# Supplementary material for: A two-lane mechanism for selective biological ammonium transport
Source: eLife. 2020 Jul 14;9:e57183. doi: 10.7554/eLife.57183 (PMC7447429; doi:10.7554/eLife.57183)
Supplement: Figure 1—source data 1. [file elife-57183-fig1-data1.xlsx]

## Sheet: NeRh50 Traces
2019-02-11-0024			2019-02-11-0015			2019-02-11-0054			2019-02-11-0040
WT NeRh50 LPR 5 NH4+ N1 M1			WT NeRh50 LPR 10 NH4+ N2 M1			WT NeRh50 Empty NH4+ N2 M2			WT NeRh50 LPR 10 K+ N1 M1
waveform	[0]		waveform	[0]		waveform	[0]		waveform	[0]
t0	00:43:57.612000		t0	00:49:55.100000		t0	2018-10-01 14:53:48		t0	00:57:16.639000
delta t	0.001		delta t	0.001		delta t	0.001		delta t	0.001
time	Y[0]		time	Y[0]		time	Y[0]		time	Y[0]
0.008	2.7733e-05		0	4.10987e-05		0	7.86916e-06		0	-0.0436321
0.009	0.00019973		0.001	0.000270438		0.001	5.64653e-05		0.001	-0.04335
0.01	0.000694036		0.002	0.000913651		0.002	0.000204393		0.002	-0.0425899
0.011	0.00161544		0.003	0.00217879		0.003	0.000512781		0.003	-0.0412157
0.012	0.00295844		0.004	0.00419128		0.004	0.00102876		0.004	-0.0392698
0.013	0.00470042		0.005	0.00699617		0.005	0.00178694		0.005	-0.0369524
0.014	0.00684533		0.006	0.0105934		0.006	0.00281166		0.006	-0.0345252
0.015	0.00938434		0.007	0.0149252		0.007	0.00411201		0.007	-0.0321657
0.016	0.0122803		0.008	0.0198561		0.008	0.00567663		0.008	-0.029962
0.017	0.0154767		0.009	0.0251943		0.009	0.0074773		0.009	-0.0279984
0.018	0.0188939		0.01	0.030744		0.01	0.00947467		0.01	-0.0263589
0.019	0.0224544		0.011	0.0363512		0.011	0.0116257		0.011	-0.0251028
0.02	0.0260996		0.012	0.0418872		0.012	0.0138959		0.012	-0.0242317
0.021	0.0297623		0.013	0.0472181		0.013	0.0162587		0.013	-0.0236667
0.022	0.0333774		0.014	0.0522197		0.014	0.0186868		0.014	-0.0233137
0.023	0.0369169		0.015	0.056792		0.015	0.0211526		0.015	-0.0231373
0.024	0.0403629		0.016	0.0608375		0.016	0.0236255		0.016	-0.0231636
0.025	0.043665		0.017	0.0642661		0.017	0.0260723		0.017	-0.0234377
0.026	0.0467694		0.018	0.0670325		0.018	0.0284685		0.018	-0.0239621
0.027	0.0496482		0.019	0.0691498		0.019	0.0308036		0.019	-0.0246665
0.028	0.0522449		0.02	0.0706813		0.02	0.0330694		0.02	-0.0254527
0.029	0.0544422		0.021	0.0717		0.021	0.0352501		0.021	-0.0262501
0.03	0.0561384		0.022	0.0722534		0.022	0.0373225		0.022	-0.0270234
0.031	0.0573256		0.023	0.0723811		0.023	0.0392594		0.023	-0.0277724
0.032	0.0580639		0.024	0.0721391		0.024	0.041035		0.024	-0.0285122
0.033	0.0584248		0.025	0.0716028		0.025	0.042632		0.025	-0.0292316
0.034	0.0584719		0.026	0.0708643		0.026	0.044044		0.026	-0.0299178
0.035	0.0582611		0.027	0.0700199		0.027	0.045274		0.027	-0.0305933
0.036	0.0578418		0.028	0.0691615		0.028	0.0463313		0.028	-0.0312484
0.037	0.0572585		0.029	0.0683542		0.029	0.0472252		0.029	-0.0318453
0.038	0.0565542		0.03	0.0676183		0.03	0.0479531		0.03	-0.0324021
0.039	0.0557719		0.031	0.0669689		0.031	0.0485068		0.031	-0.0329247
0.04	0.0549479		0.032	0.0664398		0.032	0.0488885		0.032	-0.0333311
0.041	0.0541177		0.033	0.0660469		0.033	0.0491103		0.033	-0.0335379
0.042	0.0533081		0.034	0.0657734		0.034	0.049186		0.034	-0.0335577
0.043	0.0524986		0.035	0.0655891		0.035	0.0491292		0.035	-0.0334516
0.044	0.0516302		0.036	0.0654606		0.036	0.0489524		0.036	-0.0332181
0.045	0.0506667		0.037	0.0653596		0.037	0.0486696		0.037	-0.0327902
0.046	0.0496282		0.038	0.065265		0.038	0.048298		0.038	-0.0321482
0.047	0.0485676		0.039	0.0651599		0.039	0.0478546		0.039	-0.0314083
0.048	0.0475358		0.04	0.0650292		0.04	0.0473572		0.04	-0.0307053
0.049	0.0465556		0.041	0.0648392		0.041	0.046824		0.041	-0.030039
0.05	0.0456311		0.042	0.0645451		0.042	0.0462693		0.042	-0.0293628
0.051	0.0447883		0.043	0.0641353		0.043	0.045703		0.043	-0.0286926
0.052	0.0440703		0.044	0.0636376		0.044	0.0451335		0.044	-0.0280501
0.053	0.0434901		0.045	0.0630974		0.045	0.0445731		0.045	-0.0274429
0.054	0.0430255		0.046	0.0625458		0.046	0.0440389		0.046	-0.026916
0.055	0.0426546		0.047	0.0619749		0.047	0.0435422		0.047	-0.0264816
0.056	0.0423788		0.048	0.0613794		0.048	0.0430813		0.048	-0.0260517
0.057	0.0422032		0.049	0.0608009		0.049	0.0426496		0.049	-0.02555
0.058	0.0421081		0.05	0.0603089		0.05	0.0422439		0.05	-0.0250161
0.059	0.0420651		0.051	0.0599444		0.051	0.0418616		0.051	-0.0245453
0.06	0.0420628		0.052	0.0596935		0.052	0.0414991		0.052	-0.0241777
0.061	0.0421009		0.053	0.0595314		0.053	0.0411581		0.053	-0.0238867
0.062	0.0421785		0.054	0.059452		0.054	0.0408445		0.054	-0.0236527
0.063	0.0422905		0.055	0.0594512		0.055	0.0405575		0.055	-0.0234559
0.064	0.0424336		0.056	0.0595149		0.056	0.040287		0.056	-0.0232074
0.065	0.0426055		0.057	0.0596131		0.057	0.0400301		0.057	-0.0228064
0.066	0.0428183		0.058	0.0597025		0.058	0.0397985		0.058	-0.0222217
0.067	0.0430988		0.059	0.0597408		0.059	0.0396065		0.059	-0.0214473
0.068	0.0434433		0.06	0.0597134		0.06	0.0394627		0.06	-0.020481
0.069	0.0438222		0.061	0.0596389		0.061	0.0393776		0.061	-0.0193737
0.07	0.044213		0.062	0.0595465		0.062	0.0393612		0.062	-0.0182322
0.071	0.0445875		0.063	0.0594527		0.063	0.0394093		0.063	-0.0172072
0.072	0.0449174		0.064	0.0593521		0.064	0.0395017		0.064	-0.0164404
0.073	0.0452123		0.065	0.0592439		0.065	0.0396153		0.065	-0.0159977
0.074	0.0455361		0.066	0.0591411		0.066	0.0397316		0.066	-0.0158658
0.075	0.0459579		0.067	0.0590484		0.067	0.0398341		0.067	-0.0159565
0.076	0.0465124		0.068	0.0589653		0.068	0.0399037		0.068	-0.0161684
0.077	0.0472104		0.069	0.0589049		0.069	0.0399264		0.069	-0.0164395
0.078	0.0480357		0.07	0.0588921		0.07	0.0399046		0.07	-0.0167149
0.079	0.0489608		0.071	0.0589378		0.071	0.0398482		0.071	-0.0169751
0.08	0.0499535		0.072	0.0590262		0.072	0.0397651		0.072	-0.0172281
0.081	0.0509519		0.073	0.0591421		0.073	0.0396602		0.073	-0.0174397
0.082	0.0518857		0.074	0.0592832		0.074	0.0395288		0.074	-0.0175963
0.083	0.0527083		0.075	0.0594397		0.075	0.0393565		0.075	-0.0177701
0.084	0.0533915		0.076	0.0595923		0.076	0.039133		0.076	-0.0180171
0.085	0.0539198		0.077	0.0597265		0.077	0.0388591		0.077	-0.0182833
0.086	0.0542912		0.078	0.0598306		0.078	0.0385448		0.078	-0.0184868
0.087	0.0544959		0.079	0.0598906		0.079	0.038207		0.079	-0.0185933
0.088	0.0545112		0.08	0.0599135		0.08	0.0378579		0.08	-0.0185916
0.089	0.0543334		0.081	0.0599451		0.081	0.0374977		0.081	-0.0185031
0.09	0.0539839		0.082	0.0600125		0.082	0.0371207		0.082	-0.0183899
0.091	0.0534822		0.083	0.0600733		0.083	0.0367274		0.083	-0.0183152
0.092	0.0528457		0.084	0.0600672		0.084	0.0363261		0.084	-0.0182941
0.093	0.0521102		0.085	0.0599671		0.085	0.0359238		0.085	-0.0183041
0.094	0.0513222		0.086	0.0597714		0.086	0.0355193		0.086	-0.0183325
0.095	0.0505192		0.087	0.0595147		0.087	0.0351084		0.087	-0.0183637
0.096	0.0497128		0.088	0.0592584		0.088	0.0346905		0.088	-0.0183718
0.097	0.0489004		0.089	0.0590391		0.089	0.0342735		0.089	-0.0183608
0.098	0.0480957		0.09	0.0588676		0.09	0.0338745		0.09	-0.0183521
0.099	0.0473159		0.091	0.0587434		0.091	0.0335017		0.091	-0.0183533
0.1	0.0465739		0.092	0.0586283		0.092	0.033147		0.092	-0.0183673
0.101	0.0458911		0.093	0.0584627		0.093	0.0328046		0.093	-0.0183638
0.102	0.0452812		0.094	0.0582297		0.094	0.032482		0.094	-0.0183089
0.103	0.044749		0.095	0.057965		0.095	0.032184		0.095	-0.0182426
0.104	0.0443029		0.096	0.0576989		0.096	0.0319021		0.096	-0.018217
0.105	0.0439505		0.097	0.0574322		0.097	0.0316244		0.097	-0.0182051
0.106	0.0436903		0.098	0.0571698		0.098	0.0313502		0.098	-0.0181188
0.107	0.043513		0.099	0.0569395		0.099	0.0310912		0.099	-0.0178884
0.108	0.0434273		0.1	0.0567749		0.1	0.0308595		0.1	-0.017518
0.109	0.0434514		0.101	0.0566748		0.101	0.0306617		0.101	-0.0170668
0.11	0.0435665		0.102	0.0566025		0.102	0.0305082		0.102	-0.0165989
0.111	0.0437147		0.103	0.0565333		0.103	0.0304097		0.103	-0.0161392
0.112	0.0438412		0.104	0.0564523		0.104	0.0303606		0.104	-0.0156662
0.113	0.0439257		0.105	0.0563532		0.105	0.0303457		0.105	-0.0151831
0.114	0.0439868		0.106	0.0562723		0.106	0.0303616		0.106	-0.0147707
0.115	0.0440575		0.107	0.0562546		0.107	0.0304172		0.107	-0.0144903
0.116	0.0441633		0.108	0.0563111		0.108	0.0305136		0.108	-0.0143062
0.117	0.0443233		0.109	0.0564461		0.109	0.0306374		0.109	-0.0141794
0.118	0.0445666		0.11	0.0566599		0.11	0.0307797		0.11	-0.0141252
0.119	0.0449442		0.111	0.0569256		0.111	0.0309427		0.111	-0.0141542
0.12	0.0455055		0.112	0.0572		0.112	0.0311303		0.112	-0.014225
0.121	0.0462533		0.113	0.0574468		0.113	0.0313413		0.113	-0.0142825
0.122	0.0471468		0.114	0.0576514		0.114	0.0315698		0.114	-0.0143108
0.123	0.0481397		0.115	0.0578181		0.115	0.0318099		0.115	-0.0142992
0.124	0.0491776		0.116	0.0579556		0.116	0.0320533		0.116	-0.014255
0.125	0.0501789		0.117	0.0580512		0.117	0.0322837		0.117	-0.0142631
0.126	0.0510685		0.118	0.0580703		0.118	0.0324877		0.118	-0.0144207
0.127	0.0518235		0.119	0.0579891		0.119	0.0326624		0.119	-0.0147205
0.128	0.052446		0.12	0.0577945		0.12	0.0328103		0.12	-0.0150772
0.129	0.0529085		0.121	0.0574674		0.121	0.0329279		0.121	-0.0154571
0.13	0.053177		0.122	0.0569877		0.122	0.0329973		0.122	-0.0158784
0.131	0.0532521		0.123	0.0563648		0.123	0.0329862		0.123	-0.0163409
0.132	0.0531419		0.124	0.0556584		0.124	0.032854		0.124	-0.0168504
0.133	0.0528318		0.125	0.0549475		0.125	0.0325628		0.125	-0.0173937
0.134	0.0523081		0.126	0.0543021		0.126	0.0320911		0.126	-0.0178875
0.135	0.0515912		0.127	0.0537826		0.127	0.031434		0.127	-0.0182496
0.136	0.0507317		0.128	0.0534039		0.128	0.0305967		0.128	-0.0184418
0.137	0.0497777		0.129	0.053141		0.129	0.0295927		0.129	-0.0184363
0.138	0.0487713		0.13	0.0529985		0.13	0.0284385		0.13	-0.0182195
0.139	0.0477847		0.131	0.0529966		0.131	0.0271484		0.131	-0.017786
0.14	0.0469064		0.132	0.0531191		0.132	0.0257333		0.132	-0.0171409
0.141	0.046171		0.133	0.0533203		0.133	0.0242017		0.133	-0.0163619
0.142	0.0455475		0.134	0.0535652		0.134	0.022565		0.134	-0.0156187
0.143	0.0449761		0.135	0.053858		0.135	0.0208406		0.135	-0.0150711
0.144	0.044419		0.136	0.0542045		0.136	0.0190431		0.136	-0.0147518
0.145	0.0438977		0.137	0.0545759		0.137	0.0171789		0.137	-0.0146254
0.146	0.043461		0.138	0.0549312		0.138	0.0152518		0.138	-0.0147273
0.147	0.0431435		0.139	0.0552377		0.139	0.0132747		0.139	-0.0151301
0.148	0.042948		0.14	0.0554866		0.14	0.0112711		0.14	-0.0158207
0.149	0.0428351		0.141	0.0556886		0.141	0.00926798		0.141	-0.0166856
0.15	0.0427494		0.142	0.0558563		0.142	0.00729773		0.142	-0.0175858
0.151	0.0426593		0.143	0.0559993		0.143	0.00540806		0.143	-0.0184291
0.152	0.0425624		0.144	0.0561132		0.144	0.00364757		0.144	-0.0191711
0.153	0.0424457		0.145	0.0561897		0.145	0.0020388		0.145	-0.0197866
0.154	0.0422688		0.146	0.0562374		0.146	0.00058096		0.146	-0.0202796
0.155	0.0420265		0.147	0.0562642		0.147	-0.000723352		0.147	-0.0206777
0.156	0.0417754		0.148	0.0562661		0.148	-0.00186334		0.148	-0.0209937
0.157	0.0415722		0.149	0.0562372		0.149	-0.00283135		0.149	-0.0212121
0.158	0.0414373		0.15	0.0561539		0.15	-0.0036205		0.15	-0.0213218
0.159	0.0413719		0.151	0.0559662		0.151	-0.00422887		0.151	-0.0213493
0.16	0.0413553		0.152	0.0556459		0.152	-0.00466465		0.152	-0.0213524
0.161	0.0413422		0.153	0.0552141		0.153	-0.00493533		0.153	-0.0213834
0.162	0.0412961		0.154	0.054717		0.154	-0.00504653		0.154	-0.0214234
0.163	0.0412074		0.155	0.0542197		0.155	-0.00500785		0.155	-0.021399
0.164	0.0410796		0.156	0.0537936		0.156	-0.00483339		0.156	-0.021301
0.165	0.040934		0.157	0.0534707		0.157	-0.00453838		0.157	-0.0211641
0.166	0.0408209		0.158	0.0532246		0.158	-0.00413398		0.158	-0.0209952
0.167	0.0407897		0.159	0.0530235		0.159	-0.00363306		0.159	-0.0208077
0.168	0.0408457		0.16	0.0528842		0.16	-0.00305223		0.16	-0.020638
0.169	0.0409569		0.161	0.0528307		0.161	-0.00240086		0.161	-0.0205456
0.17	0.0411014		0.162	0.0528384		0.162	-0.00168341		0.162	-0.0205707
0.171	0.0413033		0.163	0.0528637		0.163	-0.000911449		0.163	-0.0206756
0.172	0.0416326		0.164	0.0528802		0.164	-0.000100416		0.164	-0.0208068
0.173	0.0421711		0.165	0.052854		0.165	0.000742459		0.165	-0.0209607
0.174	0.0429814		0.166	0.0527413		0.166	0.00161257		0.166	-0.0211601
0.175	0.0440769		0.167	0.0525301		0.167	0.00249541		0.167	-0.0213824
0.176	0.0454122		0.168	0.0522412		0.168	0.00337722		0.168	-0.0215574
0.177	0.0469204		0.169	0.0518992		0.169	0.00425643		0.169	-0.021676
0.178	0.0485203		0.17	0.0515428		0.17	0.00513342		0.17	-0.0218158
0.179	0.0501065		0.171	0.0512327		0.171	0.00600308		0.171	-0.022034
0.18	0.0515808		0.172	0.0510148		0.172	0.00685927		0.172	-0.0223215
0.181	0.0528838		0.173	0.0509105		0.173	0.00769525		0.173	-0.0226316
0.182	0.0539745		0.174	0.0509428		0.174	0.00849615		0.174	-0.0228922
0.183	0.0547886		0.175	0.0511186		0.175	0.00924159		0.175	-0.0230657
0.184	0.0552533		0.176	0.0513902		0.176	0.00992401		0.176	-0.0231767
0.185	0.0553577		0.177	0.0516766		0.177	0.010552		0.177	-0.0232275
0.186	0.0551705		0.178	0.0519202		0.178	0.0111333		0.178	-0.0232022
0.187	0.0547677		0.179	0.0521153		0.179	0.0116675		0.179	-0.0231606
0.188	0.0542015		0.18	0.0522891		0.18	0.012152		0.18	-0.0232039
0.189	0.0535248		0.181	0.0524392		0.181	0.012586		0.181	-0.0233829
0.19	0.0527755		0.182	0.052525		0.182	0.012973		0.182	-0.0236782
0.191	0.0519596		0.183	0.0525371		0.183	0.0133198		0.183	-0.024031
0.192	0.0510806		0.184	0.0525081		0.184	0.0136362		0.184	-0.0244089
0.193	0.0501672		0.185	0.0524677		0.185	0.0139344		0.185	-0.0248324
0.194	0.0492584		0.186	0.0524367		0.186	0.0142226		0.186	-0.025313
0.195	0.0483878		0.187	0.0524235		0.187	0.0145007		0.187	-0.0258196
0.196	0.0475998		0.188	0.0524167		0.188	0.0147677		0.188	-0.0263332
0.197	0.0469235		0.189	0.052412		0.189	0.0150246		0.189	-0.0268789
0.198	0.0463321		0.19	0.0524436		0.19	0.0152716		0.19	-0.0274643
0.199	0.0457939		0.191	0.0525605		0.191	0.01551		0.191	-0.0280078
0.2	0.045307		0.192	0.0527576		0.192	0.0157446		0.192	-0.0284019
0.201	0.0448661		0.193	0.0529709		0.193	0.0159813		0.193	-0.0286374
0.202	0.0444686		0.194	0.0531417		0.194	0.0162279		0.194	-0.0287862
0.203	0.0441221		0.195	0.0532428		0.195	0.0164877		0.195	-0.0289225
0.204	0.0438337		0.196	0.0532598		0.196	0.016757		0.196	-0.0291137
0.205	0.0436235		0.197	0.0531929		0.197	0.0170374		0.197	-0.0294007
0.206	0.0435125		0.198	0.053067		0.198	0.0173354		0.198	-0.0297763
0.207	0.0434856		0.199	0.0529154		0.199	0.0176519		0.199	-0.0302142
0.208	0.0434954		0.2	0.0527672		0.2	0.0179877		0.2	-0.0306579
0.209	0.0434923		0.201	0.052647		0.201	0.0183474		0.201	-0.0310089
0.21	0.0434342		0.202	0.0525604		0.202	0.0187343		0.202	-0.0311861
0.211	0.0432875		0.203	0.0524848		0.203	0.0191482		0.203	-0.0311766
0.212	0.043043		0.204	0.0523892		0.204	0.0195857		0.204	-0.0310249
0.213	0.0427309		0.205	0.0522613		0.205	0.0200382		0.205	-0.0307846
0.214	0.0423932		0.206	0.052114		0.206	0.0204945		0.206	-0.0304889
0.215	0.0420409		0.207	0.0519622		0.207	0.0209482		0.207	-0.0301716
0.216	0.0416796		0.208	0.0518176		0.208	0.0213967		0.208	-0.0299293
0.217	0.0413499		0.209	0.0516954		0.209	0.0218361		0.209	-0.0298938
0.218	0.0410758		0.21	0.0515995		0.21	0.0222672		0.21	-0.0300972
0.219	0.0408143		0.211	0.0515226		0.211	0.0226979		0.211	-0.0304235
0.22	0.0405182		0.212	0.0514509		0.212	0.0231375		0.212	-0.0307112
0.221	0.0402163		0.213	0.0513636		0.213	0.0235904		0.213	-0.0308896
0.222	0.0399717		0.214	0.0512666		0.214	0.0240552		0.214	-0.0309851
0.223	0.0398041		0.215	0.051197		0.215	0.0245247		0.215	-0.0310725
0.224	0.03969		0.216	0.0511737		0.216	0.0249854		0.216	-0.0312811
0.225	0.0395938		0.217	0.0511787		0.217	0.0254225		0.217	-0.0317028
0.226	0.0394907		0.218	0.0511927		0.218	0.0258252		0.218	-0.0322853
0.227	0.0393825		0.219	0.0512207		0.219	0.0261858		0.219	-0.0328935
0.228	0.0393024		0.22	0.051265		0.22	0.0265015		0.22	-0.0334103
0.229	0.0392812		0.221	0.0513216		0.221	0.0267787		0.221	-0.0337461
0.23	0.0393222		0.222	0.0514207		0.222	0.0270224		0.222	-0.0338475
0.231	0.0394233		0.223	0.0515943		0.223	0.0272295		0.223	-0.0337617
0.232	0.0395835		0.224	0.0518064		0.224	0.0274009		0.224	-0.033587
0.233	0.0397862		0.225	0.0520033		0.225	0.0275475		0.225	-0.0334031
0.234	0.0400051		0.226	0.0521962		0.226	0.0276837		0.226	-0.0333166
0.235	0.0402501		0.227	0.0524165		0.227	0.0278219		0.227	-0.0333937
0.236	0.0405965		0.228	0.0526556		0.228	0.02797		0.228	-0.0335737
0.237	0.0411482		0.229	0.0528855		0.229	0.0281287		0.229	-0.0337564
0.238	0.0419783		0.23	0.0530765		0.23	0.0282933		0.23	-0.0338672
0.239	0.0431052		0.231	0.0531995		0.231	0.0284612		0.231	-0.0338626
0.24	0.0445043		0.232	0.053244		0.232	0.0286335		0.232	-0.0337683
0.241	0.0461159		0.233	0.0532184		0.233	0.0288106		0.233	-0.0336675
0.242	0.0478315		0.234	0.0531284		0.234	0.0289913		0.234	-0.0336337
0.243	0.049509		0.235	0.0529684		0.235	0.0291707		0.235	-0.0337069
0.244	0.0510321		0.236	0.0527493		0.236	0.0293382		0.236	-0.0338942
0.245	0.0523407		0.237	0.0524974		0.237	0.029487		0.237	-0.0341574
0.246	0.0533994		0.238	0.0522153		0.238	0.0296221		0.238	-0.0344359
0.247	0.0541698		0.239	0.0518849		0.239	0.0297491		0.239	-0.0346981
0.248	0.0546152		0.24	0.0515		0.24	0.0298641		0.24	-0.0349364
0.249	0.0546979		0.241	0.0510867		0.241	0.0299633		0.241	-0.0351109
0.25	0.0543958		0.242	0.0506855		0.242	0.0300477		0.242	-0.0351592
0.251	0.0537432		0.243	0.0503078		0.243	0.0301169		0.243	-0.0350599
0.252	0.0528171		0.244	0.0499462		0.244	0.0301703		0.244	-0.0348387
0.253	0.0516821		0.245	0.0496129		0.245	0.0302123		0.245	-0.0345606
0.254	0.0503677		0.246	0.049327		0.246	0.0302435		0.246	-0.0343256
0.255	0.0489115		0.247	0.0491044		0.247	0.0302501		0.247	-0.0342091
0.256	0.0473964		0.248	0.0489578		0.248	0.0302106		0.248	-0.0342303
0.257	0.0459179		0.249	0.0488632		0.249	0.0301079		0.249	-0.0343749
0.258	0.0445609		0.25	0.048775		0.25	0.0299422		0.25	-0.0346135
0.259	0.0433914		0.251	0.0486889		0.251	0.0297343		0.251	-0.034938
0.26	0.0424135		0.252	0.0486386		0.252	0.029507		0.252	-0.0353842
0.261	0.04157		0.253	0.0486564		0.253	0.0292745		0.253	-0.0359609
0.262	0.0408127		0.254	0.0487479		0.254	0.0290476		0.254	-0.0366087
0.263	0.0401606		0.255	0.0488838		0.255	0.0288352		0.255	-0.0372621
0.264	0.0396724		0.256	0.0490256		0.256	0.0286376		0.256	-0.0378481
0.265	0.0393535		0.257	0.0491521		0.257	0.0284455		0.257	-0.0382773
0.266	0.0391453		0.258	0.0492504		0.258	0.0282536		0.258	-0.0385171
0.267	0.0390071		0.259	0.0493104		0.259	0.0280724		0.259	-0.0385921
0.268	0.0389328		0.26	0.049334		0.26	0.0279168		0.26	-0.0385304
0.269	0.0389212		0.261	0.0493305		0.261	0.0277938		0.261	-0.0383705
0.27	0.0389975		0.262	0.0493072		0.262	0.0277062		0.262	-0.0381683
0.271	0.0392251		0.263	0.0492638		0.263	0.0276549		0.263	-0.0379584
0.272	0.0396646		0.264	0.0491902		0.264	0.0276343		0.264	-0.0377577
0.273	0.0403457		0.265	0.0490841		0.265	0.0276421		0.265	-0.03761
0.274	0.0412651		0.266	0.0489669		0.266	0.0276881		0.266	-0.0375479
0.275	0.0423788		0.267	0.0488633		0.267	0.0277794		0.267	-0.0375452
0.276	0.0436037		0.268	0.048785		0.268	0.0279073		0.268	-0.0375895
0.277	0.0448423		0.269	0.0487432		0.269	0.0280578		0.269	-0.037698
0.278	0.0460208		0.27	0.0487457		0.27	0.0282255		0.27	-0.0378283
0.279	0.0471086		0.271	0.0487757		0.271	0.0284106		0.271	-0.0379387
0.28	0.0480837		0.272	0.0488003		0.272	0.0286128		0.272	-0.0380719
0.281	0.0488911		0.273	0.0488026		0.273	0.0288274		0.273	-0.0382501
0.282	0.0494675		0.274	0.0488032		0.274	0.0290484		0.274	-0.0384303
0.283	0.0497858		0.275	0.0488407		0.275	0.0292774		0.275	-0.0385615
0.284	0.0498595		0.276	0.0489336		0.276	0.0295203		0.276	-0.0386144
0.285	0.0497356		0.277	0.0490796		0.277	0.0297748		0.277	-0.0386141
0.286	0.0494606		0.278	0.0492767		0.278	0.0300307		0.278	-0.0386182
0.287	0.0490294		0.279	0.0495126		0.279	0.0302777		0.279	-0.0386381
0.288	0.0484014		0.28	0.049744		0.28	0.0305128		0.28	-0.0386312
0.289	0.0475769		0.281	0.0499376		0.281	0.0307428		0.281	-0.0385932
0.29	0.0466092		0.282	0.0500939		0.282	0.0309794		0.282	-0.0385862
0.291	0.0455544		0.283	0.0502099		0.283	0.0312321		0.283	-0.038639
0.292	0.0444532		0.284	0.0502684		0.284	0.0315043		0.284	-0.0387117
0.293	0.0433384		0.285	0.0502515		0.285	0.031792		0.285	-0.0387803
0.294	0.0422334		0.286	0.0501558		0.286	0.0320882		0.286	-0.0388922
0.295	0.0411642		0.287	0.0500044		0.287	0.0323853		0.287	-0.0391231
0.296	0.0401858		0.288	0.0498242		0.288	0.032676		0.288	-0.0395232
0.297	0.039352		0.289	0.0496302		0.289	0.0329573		0.289	-0.0400763
0.298	0.0386626		0.29	0.0494406		0.29	0.0332349		0.29	-0.0406551
0.299	0.0380925		0.291	0.0492697		0.291	0.0335194		0.291	-0.0410922
0.3	0.0376505		0.292	0.0491138		0.292	0.0338186		0.292	-0.0412998
0.301	0.0373617		0.293	0.0489659		0.293	0.0341325		0.293	-0.0412798
0.302	0.0372205		0.294	0.0488359		0.294	0.0344586		0.294	-0.0410825
0.303	0.0371834		0.295	0.0487526		0.295	0.0347932		0.295	-0.0407855
0.304	0.0372122		0.296	0.0487414		0.296	0.0351239		0.296	-0.0404744
0.305	0.0373258		0.297	0.0488036		0.297	0.0354405		0.297	-0.0402277
0.306	0.0375941		0.298	0.0489093		0.298	0.0357511		0.298	-0.0401139
0.307	0.0380951		0.299	0.0490122		0.299	0.0360688		0.299	-0.0401708
0.308	0.038883		0.3	0.049088		0.3	0.0363926		0.3	-0.0403959
0.309	0.0399531		0.301	0.049146		0.301	0.0367099		0.301	-0.0407527
0.31	0.0412287		0.302	0.049197		0.302	0.0370091		0.302	-0.0411588
0.311	0.0426063		0.303	0.0492412		0.303	0.0372858		0.303	-0.0415082
0.312	0.0439979		0.304	0.0492746		0.304	0.0375374		0.304	-0.0417217
0.313	0.0453249		0.305	0.0492814		0.305	0.0377649		0.305	-0.04178
0.314	0.0465162		0.306	0.0492478		0.306	0.037974		0.306	-0.0417051
0.315	0.0475338		0.307	0.0491864		0.307	0.0381702		0.307	-0.0415434
0.316	0.048372		0.308	0.0491221		0.308	0.0383582		0.308	-0.0413809
0.317	0.0490115		0.309	0.0490598		0.309	0.0385467		0.309	-0.0413064
0.318	0.0494069		0.31	0.0489882		0.31	0.0387469		0.31	-0.0413603
0.319	0.0495348		0.311	0.0489002		0.311	0.0389645		0.311	-0.0415199
0.32	0.0494063		0.312	0.0488025		0.312	0.0391911		0.312	-0.0417183
0.321	0.0490377		0.313	0.0487006		0.313	0.0394156		0.313	-0.041897
0.322	0.0484577		0.314	0.0485633		0.314	0.0396336		0.314	-0.0420032
0.323	0.0477037		0.315	0.0483499		0.315	0.0398405		0.315	-0.041992
0.324	0.0467976		0.316	0.0480602		0.316	0.040029		0.316	-0.0418889
0.325	0.045762		0.317	0.0477017		0.317	0.0401954		0.317	-0.0417592
0.326	0.0446358		0.318	0.0472651		0.318	0.0403405		0.318	-0.0416423
0.327	0.0434583		0.319	0.0467543		0.319	0.0404678		0.319	-0.041564
0.328	0.0422622		0.32	0.0461888		0.32	0.0405766		0.32	-0.0415196
0.329	0.0410759		0.321	0.0455839		0.321	0.0406577		0.321	-0.0414775
0.33	0.0399223		0.322	0.0449537		0.322	0.0407033		0.322	-0.0414325
0.331	0.0388218		0.323	0.0443023		0.323	0.0407203		0.323	-0.0413758
0.332	0.0377967		0.324	0.0436071		0.324	0.0407211		0.324	-0.0412762
0.333	0.0368764		0.325	0.042848		0.325	0.0407083		0.325	-0.0411436
0.334	0.0360846		0.326	0.0420425		0.326	0.0406743		0.326	-0.0410204
0.335	0.0353859		0.327	0.041232		0.327	0.040617		0.327	-0.0409509
0.336	0.0346718		0.328	0.0404325		0.328	0.0405569		0.328	-0.0410455
0.337	0.0338494		0.329	0.0396066		0.329	0.0405472		0.329	-0.0415067
0.338	0.032882		0.33	0.0386988		0.33	0.0406634		0.33	-0.0425222
0.339	0.0317616		0.331	0.0376908		0.331	0.0409716		0.331	-0.04414
0.34	0.0305579		0.332	0.0366187		0.332	0.0415036		0.332	-0.046265
0.341	0.0294847		0.333	0.035597		0.333	0.042262		0.333	-0.0487346
0.342	0.0288633		0.334	0.0348719		0.334	0.0432317		0.334	-0.0513547
0.343	0.0290249		0.335	0.0348144		0.335	0.044385		0.335	-0.0539467
0.344	0.0302592		0.336	0.0358204		0.336	0.0456843		0.336	-0.0564145
0.345	0.032882		0.337	0.0382491		0.337	0.046156		0.337	-0.0587479
0.346	0.0373499		0.338	0.0424713		0.338	0.0411616		0.338	-0.0610143
0.347	0.0442747		0.339	0.0489254		0.339	0.0211379		0.339	-0.0633704
0.348	0.0543467		0.34	0.0581254		0.34	-0.0248183		0.34	-0.0660249
0.349	0.0682206		0.341	0.0706101		0.341	-0.103991		0.341	-0.0691754
0.35	0.0863515		0.342	0.0868147		0.342	-0.218241		0.342	-0.0729513
0.351	0.108894		0.343	0.106957		0.343	-0.365082		0.343	-0.0774345
0.352	0.135708		0.344	0.131006		0.344	-0.539597		0.344	-0.0828033
0.353	0.166379		0.345	0.158696		0.345	-0.736064		0.345	-0.0894128
0.354	0.200266		0.346	0.189569		0.346	-0.949209		0.346	-0.0977149
0.355	0.236624		0.347	0.223016		0.347	-1.17527		0.347	-0.108116
0.356	0.274685		0.348	0.258307		0.348	-1.41273		0.348	-0.120794
0.357	0.313716		0.349	0.29461		0.349	-1.66215		0.349	-0.135598
0.358	0.353067		0.35	0.331001		0.35	-1.92501		0.35	-0.152191
0.359	0.392176		0.351	0.366459		0.351	-2.20191		0.351	-0.170167
0.36	0.430532		0.352	0.399899		0.352	-2.49127		0.352	-0.188982
0.361	0.467642		0.353	0.430233		0.353	-2.7889		0.353	-0.207816
0.362	0.502996		0.354	0.45642		0.354	-3.08843		0.354	-0.2256
0.363	0.536059		0.355	0.477505		0.355	-3.38219		0.355	-0.241228
0.364	0.566317		0.356	0.492688		0.356	-3.6623		0.356	-0.253761
0.365	0.593345		0.357	0.50141		0.357	-3.9214		0.357	-0.262608
0.366	0.616846		0.358	0.503412		0.358	-4.1532		0.358	-0.267571
0.367	0.636624		0.359	0.498745		0.359	-4.35268		0.359	-0.268606
0.368	0.652539		0.36	0.487718		0.36	-4.51612		0.36	-0.26581
0.369	0.664472		0.361	0.470834		0.361	-4.6411		0.361	-0.259743
0.37	0.672305		0.362	0.448766		0.362	-4.72643		0.362	-0.25147
0.371	0.675891		0.363	0.422319		0.363	-4.77198		0.363	-0.242282
0.372	0.675011		0.364	0.392351		0.364	-4.77858		0.364	-0.233471
0.373	0.669345		0.365	0.359678		0.365	-4.74786		0.365	-0.226255
0.374	0.658471		0.366	0.325		0.366	-4.68222		0.366	-0.221627
0.375	0.641883		0.367	0.288918		0.367	-4.58459		0.367	-0.220164
0.376	0.61906		0.368	0.251945		0.368	-4.45829		0.368	-0.221999
0.377	0.589573		0.369	0.214464		0.369	-4.30686		0.369	-0.226859
0.378	0.553165		0.37	0.176759		0.37	-4.13401		0.37	-0.23416
0.379	0.509835		0.371	0.139094		0.371	-3.94348		0.371	-0.24316
0.38	0.459893		0.372	0.10175		0.372	-3.73897		0.372	-0.252954
0.381	0.403969		0.373	0.0649765		0.373	-3.52406		0.373	-0.26245
0.382	0.342992		0.374	0.0289378		0.374	-3.30223		0.374	-0.270541
0.383	0.278122		0.375	-0.00625932		0.375	-3.07671		0.375	-0.276295
0.384	0.210627		0.376	-0.0404966		0.376	-2.85056		0.376	-0.278996
0.385	0.141763		0.377	-0.0735912		0.377	-2.62655		0.377	-0.278226
0.386	0.0726986		0.378	-0.105277		0.378	-2.40717		0.378	-0.273981
0.387	0.00450828		0.379	-0.135218		0.379	-2.19461		0.379	-0.266679
0.388	-0.0618306		0.38	-0.163008		0.38	-1.99074		0.38	-0.257026
0.389	-0.125436		0.381	-0.188153		0.381	-1.79712		0.381	-0.245843
0.39	-0.185515		0.382	-0.210088		0.382	-1.61495		0.382	-0.233854
0.391	-0.241396		0.383	-0.228266		0.383	-1.44516		0.383	-0.221565
0.392	-0.292542		0.384	-0.24222		0.384	-1.28841		0.384	-0.20937
0.393	-0.33855		0.385	-0.251529		0.385	-1.14507		0.385	-0.197568
0.394	-0.379174		0.386	-0.255848		0.386	-1.01531		0.386	-0.18626
0.395	-0.414325		0.387	-0.254982		0.387	-0.899063		0.387	-0.175425
0.396	-0.44405		0.388	-0.248938		0.388	-0.796076		0.388	-0.165084
0.397	-0.468493		0.389	-0.237939		0.389	-0.705916		0.389	-0.155279
0.398	-0.487846		0.39	-0.222385		0.39	-0.628013		0.39	-0.14598
0.399	-0.50225		0.391	-0.2028		0.391	-0.561651		0.391	-0.137067
0.4	-0.511777		0.392	-0.179806		0.392	-0.506015		0.392	-0.128407
0.401	-0.516532		0.393	-0.154093		0.393	-0.460233		0.393	-0.119938
0.402	-0.516751		0.394	-0.126383		0.394	-0.4234		0.394	-0.111663
0.403	-0.512805		0.395	-0.0974175		0.395	-0.394576		0.395	-0.10358
0.404	-0.505167		0.396	-0.0679446		0.396	-0.37281		0.396	-0.095608
0.405	-0.49439		0.397	-0.0386524		0.397	-0.35715		0.397	-0.0876181
0.406	-0.481074		0.398	-0.0101339		0.398	-0.346671		0.398	-0.0795253
0.407	-0.46581		0.399	0.0170897		0.399	-0.340487		0.399	-0.0713016
0.408	-0.449112		0.4	0.0425585		0.4	-0.337771		0.4	-0.0630278
0.409	-0.431384		0.401	0.0659118		0.401	-0.337767		0.401	-0.0549214
0.41	-0.412964		0.402	0.0869187		0.402	-0.339786		0.402	-0.04721
0.411	-0.394143		0.403	0.105447		0.403	-0.343201		0.403	-0.0400387
0.412	-0.375139		0.404	0.121412		0.404	-0.347453		0.404	-0.0334711
0.413	-0.356099		0.405	0.134772		0.405	-0.352049		0.405	-0.0275067
0.414	-0.337128		0.406	0.145518		0.406	-0.356555		0.406	-0.0221098
0.415	-0.318319		0.407	0.15364		0.407	-0.360592		0.407	-0.0172032
0.416	-0.299768		0.408	0.159215		0.408	-0.363848		0.408	-0.0126639
0.417	-0.281542		0.409	0.162563		0.409	-0.366077		0.409	-0.0084013
0.418	-0.263586		0.41	0.164243		0.41	-0.367089		0.41	-0.00438232
0.419	-0.245736		0.411	0.164778		0.411	-0.366734		0.411	-0.0005926
0.42	-0.227843		0.412	0.164384		0.412	-0.364931		0.412	0.00296291
0.421	-0.209906		0.413	0.162933		0.413	-0.361653		0.413	0.00625652
0.422	-0.19208		0.414	0.160133		0.414	-0.356903		0.414	0.00927122
0.423	-0.174621		0.415	0.155668		0.415	-0.350712		0.415	0.012034
0.424	-0.157842		0.416	0.149202		0.416	-0.343137		0.416	0.0145605
0.425	-0.142057		0.417	0.140331		0.417	-0.334272		0.417	0.0167916
0.426	-0.127506		0.418	0.128601		0.418	-0.324238		0.418	0.0186417
0.427	-0.114327		0.419	0.113644		0.419	-0.313176		0.419	0.0200309
0.428	-0.102543		0.42	0.0953024		0.42	-0.301247		0.42	0.020899
0.429	-0.0920906		0.421	0.0736646		0.421	-0.288624		0.421	0.021273
0.43	-0.0828754		0.422	0.0490701		0.422	-0.27548		0.422	0.0212271
0.431	-0.0747971		0.423	0.022024		0.423	-0.261981		0.423	0.0207737
0.432	-0.0677251		0.424	-0.00692963		0.424	-0.248287		0.424	0.0199219
0.433	-0.0615152		0.425	-0.0372438		0.425	-0.234562		0.425	0.0187408
0.434	-0.0560421		0.426	-0.0683505		0.426	-0.220966		0.426	0.0172724
0.435	-0.0511897		0.427	-0.0996684		0.427	-0.207635		0.427	0.0155215
0.436	-0.04683		0.428	-0.130656		0.428	-0.194683		0.428	0.0135563
0.437	-0.0428492		0.429	-0.160875		0.429	-0.182212		0.429	0.0115245
0.438	-0.0391599		0.43	-0.189989		0.43	-0.170317		0.43	0.00956437
0.439	-0.0356612		0.431	-0.217707		0.431	-0.159078		0.431	0.00773562
0.44	-0.032226		0.432	-0.243762		0.432	-0.148554		0.432	0.00603729
0.441	-0.0287506		0.433	-0.267913		0.433	-0.138792		0.433	0.00447044
0.442	-0.0252096		0.434	-0.289872		0.434	-0.129824		0.434	0.00304683
0.443	-0.0216708		0.435	-0.30927		0.435	-0.121681		0.435	0.00174581
0.444	-0.0182385		0.436	-0.325725		0.436	-0.114388		0.436	0.000514635
0.445	-0.0149654		0.437	-0.338898		0.437	-0.107953		0.437	-0.00071471
0.446	-0.0118417		0.438	-0.348512		0.438	-0.102358		0.438	-0.00199447
0.447	-0.00884568		0.439	-0.354356		0.439	-0.0975732		0.439	-0.0032975
0.448	-0.00597106		0.44	-0.35632		0.44	-0.0935728		0.44	-0.00458895
0.449	-0.00324246		0.441	-0.35443		0.441	-0.0903231		0.441	-0.00594191
0.45	-0.000692649		0.442	-0.348855		0.442	-0.0877809		0.442	-0.00747189
0.451	0.00167486		0.443	-0.339842		0.443	-0.0859017		0.443	-0.00921245
0.452	0.00386363		0.444	-0.327653		0.444	-0.0846373		0.444	-0.0111016
0.453	0.00587749		0.445	-0.312586		0.445	-0.0839273		0.445	-0.0130499
0.454	0.00773814		0.446	-0.295036		0.446	-0.0837068		0.446	-0.0149696
0.455	0.00946406		0.447	-0.275539		0.447	-0.0839119		0.447	-0.0167788
0.456	0.011073		0.448	-0.254767		0.448	-0.0844811		0.448	-0.0184365
0.457	0.0126174		0.449	-0.233489		0.449	-0.0853627		0.449	-0.0199545
0.458	0.0141702		0.45	-0.21254		0.45	-0.0865062		0.45	-0.0213708
0.459	0.015766		0.451	-0.192749		0.451	-0.0878554		0.451	-0.0227067
0.46	0.0173885		0.452	-0.17483		0.452	-0.0893584		0.452	-0.0239295
0.461	0.0190082		0.453	-0.159318		0.453	-0.0909635		0.453	-0.024992
0.462	0.0205956		0.454	-0.14655		0.454	-0.0926192		0.454	-0.0259251
0.463	0.0221292		0.455	-0.136651		0.455	-0.0942886		0.455	-0.0267947
0.464	0.0236106		0.456	-0.129489		0.456	-0.0959416		0.456	-0.0275744
0.465	0.025058		0.457	-0.124675		0.457	-0.0975421		0.457	-0.0281555
0.466	0.0264894		0.458	-0.121648		0.458	-0.0990613		0.458	-0.0284659
0.467	0.0279009		0.459	-0.119788		0.459	-0.100483		0.459	-0.028524
0.468	0.0292492		0.46	-0.11848		0.46	-0.101791		0.46	-0.0284075
0.469	0.0304831		0.461	-0.11715		0.461	-0.102968		0.461	-0.0282264
0.47	0.0315988		0.462	-0.115354		0.462	-0.104007		0.462	-0.0280577
0.471	0.0326335		0.463	-0.112834		0.463	-0.104908		0.463	-0.0278781
0.472	0.0335998		0.464	-0.109499		0.464	-0.105673		0.464	-0.0276384
0.473	0.0344638		0.465	-0.105376		0.465	-0.106297		0.465	-0.0273501
0.474	0.0351954		0.466	-0.100573		0.466	-0.106779		0.466	-0.0270269
0.475	0.0358011		0.467	-0.0952444		0.467	-0.107124		0.467	-0.0266608
0.476	0.0363061		0.468	-0.0895536		0.468	-0.107339		0.468	-0.0263133
0.477	0.0367386		0.469	-0.0836485		0.469	-0.107429		0.469	-0.026128
0.478	0.0371179		0.47	-0.0776237		0.47	-0.107404		0.47	-0.0262303
0.479	0.0374774		0.471	-0.071515		0.471	-0.107275		0.471	-0.0266235
0.48	0.0379597		0.472	-0.0653242		0.472	-0.107054		0.472	-0.0271909
0.481	0.0388238		0.473	-0.0590422		0.473	-0.106751		0.473	-0.0278079
0.482	0.0403085		0.474	-0.052668		0.474	-0.106377		0.474	-0.028402
0.483	0.042525		0.475	-0.0462527		0.475	-0.10593		0.475	-0.028924
0.484	0.0454256		0.476	-0.0399157		0.476	-0.10541		0.476	-0.0293397
0.485	0.0488131		0.477	-0.0338092		0.477	-0.104824		0.477	-0.0296357
0.486	0.0524108		0.478	-0.0280908		0.478	-0.104176		0.478	-0.0298029
0.487	0.0559353		0.479	-0.0229142		0.479	-0.103466		0.479	-0.029828
0.488	0.0591287		0.48	-0.0184359		0.48	-0.102699		0.48	-0.0297316
0.489	0.0617776		0.481	-0.0148145		0.481	-0.101878		0.481	-0.0296245
0.49	0.0637293		0.482	-0.0121908		0.482	-0.100998		0.482	-0.0296102
0.491	0.0649013		0.483	-0.0106763		0.483	-0.100056		0.483	-0.0296855
0.492	0.0652877		0.484	-0.010317		0.484	-0.0990543		0.484	-0.0298441
0.493	0.0649197		0.485	-0.0110168		0.485	-0.0980037		0.485	-0.0300842
0.494	0.0638318		0.486	-0.0125135		0.486	-0.0969143		0.486	-0.0303258
0.495	0.0621133		0.487	-0.0144271		0.487	-0.0957915		0.487	-0.0305111
0.496	0.059923		0.488	-0.0163542		0.488	-0.0946359		0.488	-0.0306883
0.497	0.0574124		0.489	-0.0179816		0.489	-0.093456		0.489	-0.0309115
0.498	0.0546726		0.49	-0.0191693		0.49	-0.0922653		0.49	-0.0311705
0.499	0.0517606		0.491	-0.0199758		0.491	-0.0910682		0.491	-0.0314304
0.5	0.0487336		0.492	-0.0205768		0.492	-0.0898678		0.492	-0.0316556
0.501	0.0456523		0.493	-0.0211337		0.493	-0.0886728		0.493	-0.0318283
0.502	0.0425937		0.494	-0.0217372		0.494	-0.087489		0.494	-0.0319845
0.503	0.0396622		0.495	-0.0223933		0.495	-0.08632		0.495	-0.0321829
0.504	0.0369537		0.496	-0.0230205		0.496	-0.0851724		0.496	-0.0324404
0.505	0.0345169		0.497	-0.0235009		0.497	-0.0840515		0.497	-0.0327375
0.506	0.032363		0.498	-0.0237491		0.498	-0.08296		0.498	-0.0330756
0.507	0.0304726		0.499	-0.0236991		0.499	-0.0818998		0.499	-0.0334732
0.508	0.028781		0.5	-0.0232784		0.5	-0.0808756		0.5	-0.0338975
0.509	0.0271991		0.501	-0.0224508		0.501	-0.0798971		0.501	-0.0342747
0.51	0.0256528		0.502	-0.0212377		0.502	-0.0789671		0.502	-0.0345469
0.511	0.0240896		0.503	-0.0196679		0.503	-0.078077		0.503	-0.0346779
0.512	0.0224655		0.504	-0.0177449		0.504	-0.0772289		0.504	-0.0346683
0.513	0.0207504		0.505	-0.0154534		0.505	-0.0764418		0.505	-0.0345653
0.514	0.0189544		0.506	-0.0127774		0.506	-0.0757299		0.506	-0.0344402
0.515	0.0171151		0.507	-0.00974715		0.507	-0.075095		0.507	-0.0343611
0.516	0.0152639		0.508	-0.00645751		0.508	-0.0745315		0.508	-0.0343818
0.517	0.0134191		0.509	-0.00302452		0.509	-0.0740283		0.509	-0.03453
0.518	0.0115808		0.51	0.000442332		0.51	-0.0735801		0.51	-0.0347684
0.519	0.00975288		0.511	0.00381284		0.511	-0.0732036		0.511	-0.0350207
0.52	0.00797349		0.512	0.00689254		0.512	-0.0729293		0.512	-0.0352534
0.521	0.00627593		0.513	0.00944481		0.513	-0.0727782		0.513	-0.0354717
0.522	0.00466032		0.514	0.0112668		0.514	-0.0727561		0.514	-0.035679
0.523	0.00314187		0.515	0.0122574		0.515	-0.0728554		0.515	-0.0358664
0.524	0.00175181		0.516	0.0125003		0.516	-0.0730629		0.516	-0.0360052
0.525	0.000481815		0.517	0.0122796		0.517	-0.0733673		0.517	-0.0360763
0.526	-0.000706463		0.518	0.0119229		0.518	-0.0737534		0.518	-0.0361009
0.527	-0.00185064		0.519	0.0116259		0.519	-0.0742013		0.519	-0.0361089
0.528	-0.00298149		0.52	0.0114221		0.52	-0.0746915		0.52	-0.0360832
0.529	-0.00411277		0.521	0.011229		0.521	-0.0752029		0.521	-0.0359441
0.53	-0.00526625		0.522	0.0109209		0.522	-0.0757176		0.522	-0.0356179
0.531	-0.00646431		0.523	0.0104099		0.523	-0.076217		0.523	-0.035113
0.532	-0.00767298		0.524	0.00966909		0.524	-0.0766776		0.524	-0.0344843
0.533	-0.00884377		0.525	0.00872352		0.525	-0.0770819		0.525	-0.0337905
0.534	-0.00999073		0.526	0.00766439		0.526	-0.077428		0.526	-0.0331154
0.535	-0.0111541		0.527	0.00663514		0.527	-0.077717		0.527	-0.0325388
0.536	-0.0123218		0.528	0.00578895		0.528	-0.077943		0.528	-0.0320868
0.537	-0.0134486		0.529	0.00527962		0.529	-0.0781006		0.529	-0.031776
0.538	-0.0145281		0.53	0.00523651		0.53	-0.0781917		0.53	-0.0316423
0.539	-0.0155835		0.531	0.00569643		0.531	-0.0782228		0.531	-0.0316692
0.54	-0.0166147		0.532	0.00658595		0.532	-0.0782029		0.532	-0.0317851
0.541	-0.0175959		0.533	0.0077489		0.533	-0.0781378		0.533	-0.0319372
0.542	-0.01852		0.534	0.0089458		0.534	-0.0780277		0.534	-0.0321
0.543	-0.0194221		0.535	0.00989873		0.535	-0.0778732		0.535	-0.0322622
0.544	-0.020359		0.536	0.0104122		0.536	-0.0776764		0.536	-0.0324584
0.545	-0.0213972		0.537	0.0104143		0.537	-0.0774398		0.537	-0.0327532
0.546	-0.022609		0.538	0.00988794		0.538	-0.0771718		0.538	-0.0331757
0.547	-0.0240542		0.539	0.00884363		0.539	-0.0768869		0.539	-0.0337291
0.548	-0.0257668		0.54	0.00735471		0.54	-0.0765928		0.54	-0.0344289
0.549	-0.0277482		0.541	0.00557887		0.541	-0.0762885		0.541	-0.0352789
0.55	-0.029964		0.542	0.00376968		0.542	-0.0759716		0.542	-0.0362465
0.551	-0.032367		0.543	0.00225826		0.543	-0.075638		0.543	-0.0372874
0.552	-0.0349229		0.544	0.00134344		0.544	-0.075284		0.544	-0.0383272
0.553	-0.0376069		0.545	0.00114364		0.545	-0.0749146		0.545	-0.0392527
0.554	-0.0403929		0.546	0.0015761		0.546	-0.0745416		0.546	-0.0399955
0.555	-0.0432561		0.547	0.0024952		0.547	-0.0741738		0.547	-0.04056
0.556	-0.0461652		0.548	0.0038051		0.548	-0.073813		0.548	-0.0409688
0.557	-0.0490765		0.549	0.00549089		0.549	-0.0734571		0.549	-0.041236
0.558	-0.0519515		0.55	0.00761332		0.55	-0.0731008		0.55	-0.0413804
0.559	-0.0547649		0.551	0.0102114		0.551	-0.0727416		0.551	-0.0414268
0.56	-0.0575016		0.552	0.0131983		0.552	-0.0723867		0.552	-0.0413804
0.561	-0.0601595		0.553	0.0163646		0.553	-0.0720376		0.553	-0.0412223
0.562	-0.0627305		0.554	0.0194434		0.554	-0.0716807		0.554	-0.0409504
0.563	-0.0651978		0.555	0.0222004		0.555	-0.0713068		0.555	-0.0406014
0.564	-0.0675651		0.556	0.0244632		0.556	-0.0709242		0.556	-0.0402414
0.565	-0.0698521		0.557	0.0260578		0.557	-0.0705463		0.557	-0.0399429
0.566	-0.0720679		0.558	0.026792		0.558	-0.0701805		0.558	-0.0397597
0.567	-0.0741958		0.559	0.0265569		0.559	-0.0698331		0.559	-0.039689
0.568	-0.0762166		0.56	0.0254536		0.56	-0.0695092		0.56	-0.039638
0.569	-0.0781353		0.561	0.0238253		0.561	-0.0692077		0.561	-0.0395025
0.57	-0.079949		0.562	0.0221655		0.562	-0.0689236		0.562	-0.0392766
0.571	-0.0816162		0.563	0.0209597		0.563	-0.0686551		0.563	-0.0390392
0.572	-0.0830672		0.564	0.0205292		0.564	-0.0684044		0.564	-0.0388504
0.573	-0.0842262		0.565	0.0209575		0.565	-0.0681682		0.565	-0.0386754
0.574	-0.0850431		0.566	0.0221628		0.566	-0.0679372		0.566	-0.0384148
0.575	-0.0855162		0.567	0.0240224		0.567	-0.0677067		0.567	-0.0379909
0.576	-0.085686		0.568	0.0264237		0.568	-0.0674764		0.568	-0.0373774
0.577	-0.0856178		0.569	0.0291973		0.569	-0.0672441		0.569	-0.0365854
0.578	-0.0853836		0.57	0.0320222		0.57	-0.0670069		0.57	-0.0356819
0.579	-0.085046		0.571	0.0344771		0.571	-0.066759		0.571	-0.0347603
0.58	-0.0846495		0.572	0.0362034		0.572	-0.0664983		0.572	-0.0338796
0.581	-0.0842389		0.573	0.0370412		0.573	-0.0662313		0.573	-0.0330769
0.582	-0.0838677		0.574	0.0370824		0.574	-0.0659635		0.574	-0.0323798
0.583	-0.0835743		0.575	0.0366082		0.575	-0.0656872		0.575	-0.0318106
0.584	-0.0833759		0.576	0.0359411		0.576	-0.065387		0.576	-0.0313846
0.585	-0.0832623		0.577	0.0352663		0.577	-0.0650594		0.577	-0.0310855
0.586	-0.0832001		0.578	0.0345381		0.578	-0.0647105		0.578	-0.0308947
0.587	-0.0831352		0.579	0.0335599		0.579	-0.0643407		0.579	-0.0308197
0.588	-0.0829386		0.58	0.0321135		0.58	-0.0639465		0.58	-0.0308839
0.589	-0.0824321		0.581	0.0300289		0.581	-0.0635254		0.581	-0.0311108
0.59	-0.0815382		0.582	0.0271954		0.582	-0.063076		0.582	-0.0314599
0.591	-0.0803435		0.583	0.0235779		0.583	-0.0626044		0.583	-0.0318095
0.592	-0.0790274		0.584	0.0192661		0.584	-0.0621203		0.584	-0.032081
0.593	-0.0777868		0.585	0.0145005		0.585	-0.061624		0.585	-0.0323015
0.594	-0.0768039		0.586	0.00964884		0.586	-0.0611102		0.586	-0.0325167
0.595	-0.0762078		0.587	0.00513062		0.587	-0.0605777		0.587	-0.032741
0.596	-0.0760385		0.588	0.00132456		0.588	-0.0600347		0.588	-0.032987
0.597	-0.0762716		0.589	-0.00150004		0.589	-0.0594968		0.589	-0.0333004
0.598	-0.0768807		0.59	-0.00319636		0.59	-0.0589789		0.59	-0.0337227
0.599	-0.0778541		0.591	-0.00368132		0.591	-0.0584877		0.591	-0.0342127
0.6	-0.0791662		0.592	-0.00290299		0.592	-0.0580207		0.592	-0.0347056
0.601	-0.0807486		0.593	-0.000903121		0.593	-0.0575705		0.593	-0.035196
0.602	-0.0825117		0.594	0.00210799		0.594	-0.0571258		0.594	-0.0356717
0.603	-0.0843972		0.595	0.00576085		0.595	-0.0566737		0.595	-0.0360747
0.604	-0.0863825		0.596	0.00961454		0.596	-0.05621		0.596	-0.0363765
0.605	-0.0884566		0.597	0.0132484		0.597	-0.0557437		0.597	-0.0365445
0.606	-0.0905992		0.598	0.0163348		0.598	-0.0552854		0.598	-0.0364906
0.607	-0.0927641		0.599	0.0187351		0.599	-0.0548345		0.599	-0.036225
0.608	-0.0949003		0.6	0.0205398		0.6	-0.054383		0.6	-0.0358653
0.609	-0.0969688		0.601	0.0219494		0.601	-0.053925		0.601	-0.0354637
0.61	-0.098933		0.602	0.0231122		0.602	-0.0534573		0.602	-0.0350297
0.611	-0.10075		0.603	0.0240516		0.603	-0.0529789		0.603	-0.0346105
0.612	-0.102359		0.604	0.0246798		0.604	-0.052496		0.604	-0.0342426
0.613	-0.10369		0.605	0.0248865		0.605	-0.0520202		0.605	-0.0338936
0.614	-0.104671		0.606	0.0246915		0.606	-0.0515503		0.606	-0.0334962
0.615	-0.10527		0.607	0.0243372		0.607	-0.0510679		0.607	-0.0330361
0.616	-0.105495		0.608	0.0241996		0.608	-0.0505553		0.608	-0.0325395
0.617	-0.10535		0.609	0.0245917		0.609	-0.0500051		0.609	-0.0320035
0.618	-0.104829		0.61	0.0255987		0.61	-0.0494158		0.61	-0.0314313
0.619	-0.103949		0.611	0.0270306		0.611	-0.048789		0.611	-0.0308651
0.62	-0.102768		0.612	0.0285226		0.612	-0.0481288		0.612	-0.0303156
0.621	-0.101368		0.613	0.0296918		0.613	-0.0474407		0.613	-0.0296992
0.622	-0.099791		0.614	0.0302161		0.614	-0.046735		0.614	-0.028919
0.623	-0.0980199		0.615	0.029868		0.615	-0.0460293		0.615	-0.02801
0.624	-0.0960345		0.616	0.0285408		0.616	-0.0453421		0.616	-0.0271213
0.625	-0.0938582		0.617	0.0262411		0.617	-0.0446799		0.617	-0.0263836
0.626	-0.0915602		0.618	0.0231052		0.618	-0.0440353		0.618	-0.0258426
0.627	-0.0892239		0.619	0.0194312		0.619	-0.0434063		0.619	-0.0254959
0.628	-0.0868985		0.62	0.0156354		0.62	-0.042809		0.62	-0.0253407
0.629	-0.0846094		0.621	0.0121653		0.621	-0.0422622		0.621	-0.0253717
0.63	-0.0823958		0.622	0.00942021		0.622	-0.0417674		0.622	-0.0255657
0.631	-0.0803076		0.623	0.00766811		0.623	-0.0413173		0.623	-0.0259063
0.632	-0.0783819		0.624	0.00701262		0.624	-0.0409101		0.624	-0.0264234
0.633	-0.076636		0.625	0.00747372		0.625	-0.0405463		0.625	-0.0271488
0.634	-0.0750663		0.626	0.00908868		0.626	-0.0402268		0.626	-0.0280085
0.635	-0.0736413		0.627	0.0119079		0.627	-0.0399472		0.627	-0.0288086
0.636	-0.0723243		0.628	0.0158963		0.628	-0.0396958		0.628	-0.0293581
0.637	-0.0710888		0.629	0.0208582		0.629	-0.0394703		0.629	-0.0296057
0.638	-0.0699061		0.63	0.0264695		0.63	-0.0392805		0.63	-0.0296202
0.639	-0.0687526		0.631	0.032369		0.631	-0.0391312		0.631	-0.0294488
0.64	-0.067631		0.632	0.0382231		0.632	-0.0390179		0.632	-0.0291329
0.641	-0.0665849		0.633	0.0437561		0.633	-0.0389321		0.633	-0.0288061
0.642	-0.0656781		0.634	0.0487313		0.634	-0.0388652		0.634	-0.0285967
0.643	-0.0649558		0.635	0.0529038		0.635	-0.0388147		0.635	-0.0285212
0.644	-0.0644375		0.636	0.0560187		0.636	-0.0387822		0.636	-0.0285408
0.645	-0.0641145		0.637	0.0578972		0.637	-0.0387606		0.637	-0.0286087
0.646	-0.0639501		0.638	0.0585464		0.638	-0.038737		0.638	-0.0286991
0.647	-0.0639016		0.639	0.0581536		0.639	-0.0387113		0.639	-0.0288156
0.648	-0.0639368		0.64	0.0570016		0.64	-0.0386884		0.64	-0.0289388
0.649	-0.0640448		0.641	0.0554494		0.641	-0.0386648		0.641	-0.0290327
0.65	-0.0642437		0.642	0.0538903		0.642	-0.0386372		0.642	-0.0290928
0.651	-0.0645639		0.643	0.0526314		0.643	-0.0386035		0.643	-0.0291586
0.652	-0.0650343		0.644	0.0518672		0.644	-0.0385524		0.644	-0.029258
0.653	-0.0656878		0.645	0.051735		0.645	-0.0384656		0.645	-0.0293382
0.654	-0.0665347		0.646	0.0522994		0.646	-0.0383335		0.646	-0.0293477
0.655	-0.0675371		0.647	0.0535034		0.647	-0.0381615		0.647	-0.0293369
0.656	-0.068651		0.648	0.0551475		0.648	-0.0379607		0.648	-0.0293594
0.657	-0.0698818		0.649	0.056889		0.649	-0.037735		0.649	-0.0293835
0.658	-0.0712634		0.65	0.0582959		0.65	-0.0374885		0.65	-0.0293582
0.659	-0.0728065		0.651	0.0589379		0.651	-0.0372328		0.651	-0.02926
0.66	-0.0744864		0.652	0.0584686		0.652	-0.0369763		0.652	-0.0290885
0.661	-0.0762483		0.653	0.0567219		0.653	-0.0367212		0.653	-0.0288664
0.662	-0.0780334		0.654	0.053756		0.654	-0.0364722		0.654	-0.028631
0.663	-0.0798184		0.655	0.049803		0.655	-0.0362354		0.655	-0.0284312
0.664	-0.0816077		0.656	0.0452325		0.656	-0.0360196		0.656	-0.0282894
0.665	-0.0833841		0.657	0.0405016		0.657	-0.0358313		0.657	-0.0281889
0.666	-0.0851046		0.658	0.0360165		0.658	-0.0356652		0.658	-0.0281361
0.667	-0.086734		0.659	0.032007		0.659	-0.0355126		0.659	-0.028166
0.668	-0.0882477		0.66	0.0285647		0.66	-0.0353736		0.66	-0.0283003
0.669	-0.0896314		0.661	0.0257747		0.661	-0.0352556		0.661	-0.0285
0.67	-0.0908847		0.662	0.0237371		0.662	-0.0351682		0.662	-0.0286479
0.671	-0.0920023		0.663	0.0225423		0.663	-0.0351133		0.663	-0.0286464
0.672	-0.0929865		0.664	0.0222969		0.664	-0.0350795		0.664	-0.0285135
0.673	-0.0938505		0.665	0.0230912		0.665	-0.0350511		0.665	-0.0283168
0.674	-0.0945699		0.666	0.0249412		0.666	-0.03502		0.666	-0.0280976
0.675	-0.0950936		0.667	0.0277896		0.667	-0.0349865		0.667	-0.0279067
0.676	-0.0954063		0.668	0.0315018		0.668	-0.0349523		0.668	-0.0277862
0.677	-0.0955202		0.669	0.0358598		0.669	-0.034921		0.669	-0.027728
0.678	-0.0954328		0.67	0.0406098		0.67	-0.0348965		0.67	-0.0276968
0.679	-0.095139		0.671	0.0455309		0.671	-0.0348725		0.671	-0.0276355
0.68	-0.0946613		0.672	0.0504638		0.672	-0.034842		0.672	-0.0274771
0.681	-0.0940395		0.673	0.0552854		0.673	-0.0348158		0.673	-0.0272061
0.682	-0.0933197		0.674	0.0598923		0.674	-0.0348082		0.674	-0.0268895
0.683	-0.0925476		0.675	0.0642108		0.675	-0.0348161		0.675	-0.0266188
0.684	-0.0917447		0.676	0.0681796		0.676	-0.0348314		0.676	-0.0264538
0.685	-0.0909063		0.677	0.0717196		0.677	-0.0348527		0.677	-0.0264031
0.686	-0.0900286		0.678	0.0746801		0.678	-0.0348709		0.678	-0.0264052
0.687	-0.0891278		0.679	0.0768056		0.679	-0.0348682		0.679	-0.0263778
0.688	-0.0882347		0.68	0.077851		0.68	-0.0348369		0.68	-0.0263003
0.689	-0.0874017		0.681	0.0777052		0.681	-0.0347793		0.681	-0.0262218
0.69	-0.086698		0.682	0.076366		0.682	-0.0346999		0.682	-0.0262443
0.691	-0.0861455		0.683	0.0739176		0.683	-0.0346067		0.683	-0.0264616
0.692	-0.0856852		0.684	0.0705438		0.684	-0.0345063		0.684	-0.0268516
0.693	-0.085248		0.685	0.0664942		0.685	-0.0343953		0.685	-0.0273128
0.694	-0.0848218		0.686	0.0620417		0.686	-0.0342686		0.686	-0.0277897
0.695	-0.0844256		0.687	0.0574736		0.687	-0.0341261		0.687	-0.0282856
0.696	-0.0840804		0.688	0.0530733		0.688	-0.0339688		0.688	-0.02879
0.697	-0.0838244		0.689	0.0490616		0.689	-0.0337966		0.689	-0.0292217
0.698	-0.0836972		0.69	0.0455899		0.69	-0.033608		0.69	-0.0294894
0.699	-0.0837104		0.691	0.0427809		0.691	-0.0334001		0.691	-0.0296083
0.7	-0.0838605		0.692	0.0407241		0.692	-0.0331787		0.692	-0.0296869
0.701	-0.0841293		0.693	0.0394541		0.693	-0.0329562		0.693	-0.0297959
0.702	-0.0844936		0.694	0.0389495		0.694	-0.0327414		0.694	-0.0299365
0.703	-0.0849486		0.695	0.039141		0.695	-0.0325395		0.695	-0.0301113
0.704	-0.0854889		0.696	0.0399222		0.696	-0.0323491		0.696	-0.0302759
0.705	-0.0860912		0.697	0.0411431		0.697	-0.0321595		0.697	-0.0303028
0.706	-0.0867373		0.698	0.0426159		0.698	-0.0319593		0.698	-0.0301034
0.707	-0.0874351		0.699	0.0441626		0.699	-0.031743		0.699	-0.0297208
0.708	-0.0882049		0.7	0.0456681		0.7	-0.0315092		0.7	-0.0292709
0.709	-0.0890467		0.701	0.0470821		0.701	-0.0312611		0.701	-0.0288199
0.71	-0.0899313		0.702	0.0483797		0.702	-0.0310019		0.702	-0.0283749
0.711	-0.0908348		0.703	0.0495327		0.703	-0.0307364		0.703	-0.0279529
0.712	-0.0917615		0.704	0.0504973		0.704	-0.0304784		0.704	-0.0275807
0.713	-0.0926919		0.705	0.0512401		0.705	-0.0302413		0.705	-0.0272708
0.714	-0.0935608		0.706	0.0517686		0.706	-0.0300248		0.706	-0.0270156
0.715	-0.0943211		0.707	0.0521018		0.707	-0.0298214		0.707	-0.0267932
0.716	-0.0949604		0.708	0.0522543		0.708	-0.0296304		0.708	-0.0266331
0.717	-0.0954582		0.709	0.0522451		0.709	-0.0294559		0.709	-0.0266092
0.718	-0.0957816		0.71	0.0520781		0.71	-0.0292965		0.71	-0.0267208
0.719	-0.0959027		0.711	0.0517483		0.711	-0.0291431		0.711	-0.0268969
0.72	-0.0958078		0.712	0.0512542		0.712	-0.0289862		0.712	-0.0270905
0.721	-0.095501		0.713	0.0505989		0.713	-0.0288255		0.713	-0.0272699
0.722	-0.0949766		0.714	0.0497972		0.714	-0.0286685		0.714	-0.0273919
0.723	-0.0942004		0.715	0.0488685		0.715	-0.0285168		0.715	-0.0274551
0.724	-0.0931408		0.716	0.0478285		0.716	-0.028365		0.716	-0.0274614
0.725	-0.0917856		0.717	0.0467066		0.717	-0.0282114		0.717	-0.0273382
0.726	-0.0901515		0.718	0.0455486		0.718	-0.0280593		0.718	-0.0270303
0.727	-0.0883051		0.719	0.0443938		0.719	-0.0279136		0.719	-0.0265827
0.728	-0.0863296		0.72	0.0432585		0.72	-0.0277747		0.72	-0.0260966
0.729	-0.0842639		0.721	0.0421402		0.721	-0.0276387		0.721	-0.0256608
0.73	-0.0821011		0.722	0.0410356		0.722	-0.027509		0.722	-0.025302
0.731	-0.0798437		0.723	0.0399601		0.723	-0.027395		0.723	-0.0250172
0.732	-0.077538		0.724	0.0389359		0.724	-0.0272953		0.724	-0.0248185
0.733	-0.0752427		0.725	0.0379597		0.725	-0.0271955		0.725	-0.0247013
0.734	-0.0729849		0.726	0.0370203		0.726	-0.0270883		0.726	-0.0246311
0.735	-0.0707711		0.727	0.0361106		0.727	-0.0269797		0.727	-0.0245551
0.736	-0.0686175		0.728	0.0352024		0.728	-0.0268765		0.728	-0.0244073
0.737	-0.066536		0.729	0.0342804		0.729	-0.0267867		0.729	-0.0241601
0.738	-0.0645162		0.73	0.0333785		0.73	-0.0267212		0.73	-0.0238844
0.739	-0.0625537		0.731	0.0325371		0.731	-0.0266837		0.731	-0.0237279
0.74	-0.0606781		0.732	0.0317648		0.732	-0.0266661		0.732	-0.0237972
0.741	-0.0589322		0.733	0.0310518		0.733	-0.0266551		0.733	-0.0240452
0.742	-0.0573255		0.734	0.0303929		0.734	-0.026644		0.734	-0.0243264
0.743	-0.055839		0.735	0.0297693		0.735	-0.0266326		0.735	-0.0245451
0.744	-0.0544852		0.736	0.0291248		0.736	-0.0266172		0.736	-0.0247052
0.745	-0.0533192		0.737	0.0284134		0.737	-0.0265911		0.737	-0.0248428
0.746	-0.0523843		0.738	0.0276424		0.738	-0.026545		0.738	-0.0249565
0.747	-0.0517017		0.739	0.0268387		0.739	-0.0264656		0.739	-0.0250313
0.748	-0.0512959		0.74	0.0260058		0.74	-0.0263449		0.74	-0.0250758
0.749	-0.0511855		0.741	0.0251355		0.741	-0.0261887		0.741	-0.0251068
0.75	-0.0513789		0.742	0.024245		0.742	-0.0260104		0.742	-0.025125
0.751	-0.051877		0.743	0.023372		0.743	-0.0258189		0.743	-0.0251452
0.752	-0.0526568		0.744	0.0225346		0.744	-0.0256183		0.744	-0.0252169
0.753	-0.0536787		0.745	0.0217212		0.745	-0.0254167		0.745	-0.0253707
0.754	-0.0549274		0.746	0.0209162		0.746	-0.0252182		0.746	-0.0255751
0.755	-0.0564227		0.747	0.0201319		0.747	-0.0250128		0.747	-0.0257205
0.756	-0.058169		0.748	0.0194304		0.748	-0.0247913		0.748	-0.0257126
0.757	-0.0601197		0.749	0.0188851		0.749	-0.0245616		0.749	-0.0255866
0.758	-0.0621955		0.75	0.0185144		0.75	-0.0243457		0.75	-0.0254245
0.759	-0.0643108		0.751	0.0182922		0.751	-0.0241643		0.751	-0.0252581
0.76	-0.0663876		0.752	0.0181701		0.752	-0.024017		0.752	-0.0250886
0.761	-0.0683664		0.753	0.01807		0.753	-0.0238864		0.753	-0.0249227
0.762	-0.0702037		0.754	0.0179216		0.754	-0.0237558		0.754	-0.0247767
0.763	-0.071869		0.755	0.0177123		0.755	-0.02362		0.755	-0.0246599
0.764	-0.0733607		0.756	0.0174506		0.756	-0.0234876		0.756	-0.0246128
0.765	-0.0747013		0.757	0.017112		0.757	-0.0233768		0.757	-0.0246988
0.766	-0.0759134		0.758	0.0166743		0.758	-0.0233034		0.758	-0.0249222
0.767	-0.0769934		0.759	0.0161482		0.759	-0.02327		0.759	-0.0252581
0.768	-0.0779021		0.76	0.0155569		0.76	-0.0232694		0.76	-0.025659
0.769	-0.0786134		0.761	0.0149554		0.761	-0.0232959		0.761	-0.0260172
0.77	-0.0791542		0.762	0.014422		0.762	-0.0233412		0.762	-0.0262652
0.771	-0.0795742		0.763	0.0139843		0.763	-0.0233903		0.763	-0.0264263
0.772	-0.0799095		0.764	0.0136212		0.764	-0.0234349		0.764	-0.026528
0.773	-0.0801663		0.765	0.0133193		0.765	-0.0234778		0.765	-0.0265742
0.774	-0.080325		0.766	0.0130705		0.766	-0.0235229		0.766	-0.0265511
0.775	-0.0803628		0.767	0.0128551		0.767	-0.0235731		0.767	-0.0264077
0.776	-0.0802731		0.768	0.0126457		0.768	-0.0236344		0.768	-0.0261106
0.777	-0.0800502		0.769	0.0124098		0.769	-0.0237134		0.769	-0.0257028
0.778	-0.0796581		0.77	0.0121265		0.77	-0.0238103		0.77	-0.0252556
0.779	-0.0790543		0.771	0.0117953		0.771	-0.0239188		0.771	-0.0248153
0.78	-0.0782251		0.772	0.0114329		0.772	-0.0240317		0.772	-0.0244212
0.781	-0.0771935		0.773	0.0110626		0.773	-0.0241403		0.773	-0.0241434
0.782	-0.076022		0.774	0.010703		0.774	-0.0242351		0.774	-0.0240635
0.783	-0.0747765		0.775	0.0103698		0.775	-0.0243107		0.775	-0.0241926
0.784	-0.0734879		0.776	0.0100637		0.776	-0.0243611		0.776	-0.0244317
0.785	-0.0721591		0.777	0.00976641		0.777	-0.024374		0.777	-0.0246653
0.786	-0.0707947		0.778	0.00945874		0.778	-0.0243364		0.778	-0.0248512
0.787	-0.0694245		0.779	0.00911103		0.779	-0.0242439		0.779	-0.024969
0.788	-0.0680974		0.78	0.00869647		0.78	-0.0241006		0.78	-0.0249684
0.789	-0.0668358		0.781	0.00821348		0.781	-0.02391		0.781	-0.0248198
0.79	-0.0656069		0.782	0.00766751		0.782	-0.0236728		0.782	-0.024557
0.791	-0.0643637		0.783	0.00705646		0.783	-0.0233903		0.783	-0.0242322
0.792	-0.0630969		0.784	0.0063717		0.784	-0.0230637		0.784	-0.0238577
0.793	-0.0618442		0.785	0.00561976		0.785	-0.0226994		0.785	-0.0234371
0.794	-0.0606832		0.786	0.00485143		0.786	-0.0223094		0.786	-0.0230177
0.795	-0.0596826		0.787	0.00416022		0.787	-0.0219011		0.787	-0.0226526
0.796	-0.0588396		0.788	0.00362756		0.788	-0.0214767		0.788	-0.0223752
0.797	-0.0581082		0.789	0.00325343		0.789	-0.0210455		0.789	-0.0222215
0.798	-0.0574689		0.79	0.00297215		0.79	-0.0206236		0.79	-0.0222348
0.799	-0.0569315		0.791	0.00272879		0.791	-0.020225		0.791	-0.0224484
0.8	-0.0565029		0.792	0.00250542		0.792	-0.019864		0.792	-0.0228333
0.801	-0.0561811		0.793	0.00230236		0.793	-0.0195518		0.793	-0.0232995
0.802	-0.0559698		0.794	0.00213315		0.794	-0.019291		0.794	-0.0237591
0.803	-0.0558786		0.795	0.00201415		0.795	-0.0190809		0.795	-0.024137
0.804	-0.0559179		0.796	0.00194016		0.796	-0.0189158		0.796	-0.0243751
0.805	-0.0560995		0.797	0.00187341		0.797	-0.0187787		0.797	-0.0244614
0.806	-0.0564262		0.798	0.0017541		0.798	-0.0186506		0.798	-0.0244561
0.807	-0.056897		0.799	0.00155289		0.799	-0.018521		0.799	-0.024446
0.808	-0.057519		0.8	0.00130532		0.8	-0.0183894		0.8	-0.0244616
0.809	-0.0582639		0.801	0.00105311		0.801	-0.0182582		0.801	-0.0245024
0.81	-0.059061		0.802	0.000785545		0.802	-0.0181246		0.802	-0.0246044
0.811	-0.0598562		0.803	0.000491409		0.803	-0.0179859		0.803	-0.024802
0.812	-0.060609		0.804	0.000216944		0.804	-0.0178457		0.804	-0.0250499
0.813	-0.061263		0.805	2.63553e-05		0.805	-0.0177086		0.805	-0.0252596
0.814	-0.0617673		0.806	-4.0005e-05		0.806	-0.0175768		0.806	-0.0253717
0.815	-0.0620935		0.807	1.83975e-05		0.807	-0.0174538		0.807	-0.0253538
0.816	-0.0622259		0.808	0.000168726		0.808	-0.0173412		0.808	-0.0251937
0.817	-0.0621531		0.809	0.000410961		0.809	-0.0172365		0.809	-0.0248895
0.818	-0.0618598		0.81	0.00080003		0.81	-0.0171332		0.81	-0.0244443
0.819	-0.0613326		0.811	0.00140056		0.811	-0.0170192		0.811	-0.0238948
0.82	-0.0605687		0.812	0.00226652		0.812	-0.0168803		0.812	-0.0233333
0.821	-0.0595561		0.813	0.00342488		0.813	-0.0167063		0.813	-0.0228533
0.822	-0.058277		0.814	0.00488189		0.814	-0.0164987		0.814	-0.0224362
0.823	-0.0567474		0.815	0.00665958		0.815	-0.0162739		0.815	-0.0219847
0.824	-0.0550341		0.816	0.00875304		0.816	-0.0160479		0.816	-0.021453
0.825	-0.0532108		0.817	0.0110866		0.817	-0.0158273		0.817	-0.0208749
0.826	-0.0513132		0.818	0.0135766		0.818	-0.0156169		0.818	-0.0203175
0.827	-0.0493772		0.819	0.0161774		0.819	-0.0154176		0.819	-0.0198028
0.828	-0.0474668		0.82	0.0188621		0.82	-0.0152197		0.82	-0.0193301
0.829	-0.0456016		0.821	0.0215836		0.821	-0.0150155		0.821	-0.0189634
0.83	-0.0437234		0.822	0.0242528		0.822	-0.0148083		0.822	-0.0187753
0.831	-0.0417929		0.823	0.0267819		0.823	-0.0145979		0.823	-0.0187829
0.832	-0.0398345		0.824	0.0291265		0.824	-0.0143765		0.824	-0.0189688
0.833	-0.0378718		0.825	0.0312642		0.825	-0.014144		0.825	-0.0192897
0.834	-0.0359218		0.826	0.0331855		0.826	-0.01391		0.826	-0.0196693
0.835	-0.0340222		0.827	0.0349122		0.827	-0.0136755		0.827	-0.0200116
0.836	-0.0322058		0.828	0.0364766		0.828	-0.013434		0.828	-0.0202237
0.837	-0.0304766		0.829	0.0378993		0.829	-0.0131909		0.829	-0.0201821
0.838	-0.0288365		0.83	0.0392062		0.83	-0.0129667		0.83	-0.01974
0.839	-0.0273216		0.831	0.0404382		0.831	-0.0127762		0.831	-0.0188871
0.84	-0.0259764		0.832	0.0416423		0.832	-0.0126162		0.832	-0.0178168
0.841	-0.0248251		0.833	0.0428746		0.833	-0.0124814		0.833	-0.0167785
0.842	-0.0238782		0.834	0.0441956		0.834	-0.0123756		0.834	-0.015991
0.843	-0.0231113		0.835	0.0456407		0.835	-0.012295		0.835	-0.0156311
0.844	-0.0224754		0.836	0.0472268		0.836	-0.0122205		0.836	-0.0157211
0.845	-0.0219633		0.837	0.0489971		0.837	-0.0121335		0.837	-0.0161126
0.846	-0.0216069		0.838	0.0510115		0.838	-0.0120316		0.838	-0.0166379
0.847	-0.0214088		0.839	0.0532817		0.839	-0.0119211		0.839	-0.0172073
0.848	-0.0213345		0.84	0.0557698		0.84	-0.0118041		0.84	-0.0178368
0.849	-0.0213672		0.841	0.0584485		0.841	-0.0116853		0.841	-0.0185826
0.85	-0.0215121		0.842	0.0613155		0.842	-0.0115772		0.842	-0.0194027
0.851	-0.0217543		0.843	0.0643717		0.843	-0.0114888		0.843	-0.0201848
0.852	-0.0220767		0.844	0.0676007		0.844	-0.0114237		0.844	-0.020847
0.853	-0.022478		0.845	0.0709688		0.845	-0.0113843		0.845	-0.0213447
0.854	-0.0229348		0.846	0.0744353		0.846	-0.0113695		0.846	-0.0216775
0.855	-0.0234191		0.847	0.0779381		0.847	-0.011368		0.847	-0.0219117
0.856	-0.0239304		0.848	0.0814017		0.848	-0.011359		0.848	-0.0221678
0.857	-0.0244633		0.849	0.0847651		0.849	-0.0113278		0.849	-0.0225564
0.858	-0.0250018		0.85	0.0879964		0.85	-0.0112728		0.85	-0.0230672
0.859	-0.0255495		0.851	0.0910926		0.851	-0.0111997		0.851	-0.0235646
0.86	-0.026115		0.852	0.0940597		0.852	-0.0111182		0.852	-0.0239761
0.861	-0.0266982		0.853	0.0968926		0.853	-0.0110401		0.853	-0.0243594
0.862	-0.0273181		0.854	0.0995509		0.854	-0.0109785		0.854	-0.024738
0.863	-0.0280079		0.855	0.101958		0.855	-0.0109403		0.855	-0.0250649
0.864	-0.0287683		0.856	0.104057		0.856	-0.0109241		0.856	-0.0253106
0.865	-0.0295462		0.857	0.105817		0.857	-0.0109299		0.857	-0.0254461
0.866	-0.0302668		0.858	0.107195		0.858	-0.0109595		0.858	-0.0254329
0.867	-0.0308816		0.859	0.108149		0.859	-0.011006		0.859	-0.0252724
0.868	-0.0313805		0.86	0.108649		0.86	-0.0110541		0.86	-0.0249983
0.869	-0.0317725		0.861	0.108652		0.861	-0.0110888		0.861	-0.024641
0.87	-0.0320644		0.862	0.108123		0.862	-0.0111063		0.862	-0.0242416
0.871	-0.0322503		0.863	0.107095		0.863	-0.0111153		0.863	-0.0238444
0.872	-0.0323366		0.864	0.105651		0.864	-0.0111237		0.864	-0.0234449
0.873	-0.0323561		0.865	0.103819		0.865	-0.011133		0.865	-0.023017
0.874	-0.0323346		0.866	0.101565		0.866	-0.011143		0.866	-0.0225829
0.875	-0.0322766		0.867	0.0988452		0.867	-0.0111569		0.867	-0.0222149
0.876	-0.0321747		0.868	0.0956276		0.868	-0.0111796		0.868	-0.0219882
0.877	-0.0320067		0.869	0.091988		0.869	-0.0112136		0.869	-0.0219013
0.878	-0.031752		0.87	0.088172		0.87	-0.0112567		0.87	-0.0218221
0.879	-0.0314297		0.871	0.0844364		0.871	-0.0113038		0.871	-0.0215979
0.88	-0.0310736		0.872	0.0808602		0.872	-0.0113512		0.872	-0.0212297
0.881	-0.0306778		0.873	0.0773192		0.873	-0.0113923		0.873	-0.0208657
0.882	-0.0302185		0.874	0.0735148		0.874	-0.0114172		0.874	-0.02065
0.883	-0.0297232		0.875	0.069025		0.875	-0.0114237		0.875	-0.0206148
0.884	-0.0292654		0.876	0.0633752		0.876	-0.0114173		0.876	-0.020713
0.885	-0.0288851		0.877	0.0561146		0.877	-0.0114035		0.877	-0.0208882
0.886	-0.0285658		0.878	0.0469061		0.878	-0.0113791		0.878	-0.0210924
0.887	-0.0282827		0.879	0.0355631		0.879	-0.0113311		0.879	-0.0212838
0.888	-0.0280391		0.88	0.0220329		0.88	-0.0112507		0.88	-0.0214266
0.889	-0.0278549		0.881	0.00640879		0.881	-0.0111431		0.881	-0.0214992
0.89	-0.0277406		0.882	-0.0110779		0.882	-0.0110208		0.882	-0.0214797
0.891	-0.0276958		0.883	-0.0301381		0.883	-0.0108952		0.883	-0.0213489
0.892	-0.0277118		0.884	-0.0504611		0.884	-0.0107744		0.884	-0.0211237
0.893	-0.0277821		0.885	-0.0716782		0.885	-0.010663		0.885	-0.0208386
0.894	-0.0279378		0.886	-0.0933438		0.886	-0.0105543		0.886	-0.0205174
0.895	-0.0282453		0.887	-0.114926		0.887	-0.0104375		0.887	-0.0201647
0.896	-0.0287488		0.888	-0.135848		0.888	-0.0103118		0.888	-0.0197935
0.897	-0.0294578		0.889	-0.155609		0.889	-0.0101835		0.889	-0.0194829
0.898	-0.0303879		0.89	-0.173852		0.89	-0.0100583		0.89	-0.0193421
0.899	-0.0315626		0.891	-0.190312		0.891	-0.00994255		0.891	-0.0194062
0.9	-0.0329811		0.892	-0.204745		0.892	-0.00984831		0.892	-0.0196238
0.901	-0.0346222		0.893	-0.216939		0.893	-0.00978937		0.893	-0.019942
0.902	-0.0364664		0.894	-0.226745		0.894	-0.00976969		0.894	-0.0203413
0.903	-0.0384805		0.895	-0.234073		0.895	-0.0097835		0.895	-0.0207929
0.904	-0.040594		0.896	-0.238894		0.896	-0.0098237		0.896	-0.0212271
0.905	-0.0427413		0.897	-0.241268		0.897	-0.00988929		0.897	-0.0215712
0.906	-0.0449062		0.898	-0.241331		0.898	-0.0099846		0.898	-0.0218205
0.907	-0.0471027		0.899	-0.239295		0.899	-0.01011		0.899	-0.0220292
0.908	-0.049348		0.9	-0.235422		0.9	-0.0102559		0.9	-0.0222397
0.909	-0.0516374		0.901	-0.229954		0.901	-0.0104036		0.901	-0.0224584
0.91	-0.0539302		0.902	-0.223112		0.902	-0.0105329		0.902	-0.0226492
0.911	-0.0561784		0.903	-0.215161		0.903	-0.0106316		0.903	-0.0227333
0.912	-0.0583488		0.904	-0.206444		0.904	-0.0106973		0.904	-0.0226645
0.913	-0.0604144		0.905	-0.19734		0.905	-0.0107326		0.905	-0.0224847
0.914	-0.0623298		0.906	-0.1882		0.906	-0.0107439		0.906	-0.0222963
0.915	-0.0640231		0.907	-0.179299		0.907	-0.0107441		0.907	-0.0222018
0.916	-0.0654589		0.908	-0.170805		0.908	-0.010746		0.908	-0.0222508
0.917	-0.0666827		0.909	-0.162772		0.909	-0.0107573		0.909	-0.0224436
0.918	-0.0677566		0.91	-0.155172		0.91	-0.0107806		0.91	-0.0227326
0.919	-0.0686882		0.911	-0.147964		0.911	-0.010821		0.911	-0.0230469
0.92	-0.0694542		0.912	-0.141114		0.912	-0.0108861		0.912	-0.0233658
0.921	-0.0700529		0.913	-0.134582		0.913	-0.0109753		0.913	-0.0236832
0.922	-0.0704844		0.914	-0.128351		0.914	-0.01108		0.914	-0.023937
0.923	-0.0707222		0.915	-0.122444		0.915	-0.0111952		0.915	-0.0240709
0.924	-0.070746		0.916	-0.116921		0.916	-0.0113198		0.916	-0.0240793
0.925	-0.0705601		0.917	-0.111871		0.917	-0.0114519		0.917	-0.0239757
0.926	-0.0701688		0.918	-0.107391		0.918	-0.0115881		0.918	-0.0237794
0.927	-0.0695744		0.919	-0.103544		0.919	-0.0117261		0.919	-0.023477
0.928	-0.0688014		0.92	-0.100331		0.92	-0.0118646		0.92	-0.0230532
0.929	-0.0678916		0.921	-0.0976694		0.921	-0.0119977		0.921	-0.0225667
0.93	-0.0668652		0.922	-0.0954009		0.922	-0.0121183		0.922	-0.0221109
0.931	-0.0657126		0.923	-0.093333		0.923	-0.012227		0.923	-0.0217695
0.932	-0.0644363		0.924	-0.0912991		0.924	-0.012325		0.924	-0.0216093
0.933	-0.0630719		0.925	-0.0891973		0.925	-0.0124095		0.925	-0.0216413
0.934	-0.0616555		0.926	-0.0869899		0.926	-0.0124807		0.926	-0.0218243
0.935	-0.0602099		0.927	-0.0846893		0.927	-0.012546		0.927	-0.0221213
0.936	-0.0587761		0.928	-0.0823424		0.928	-0.0126195		0.928	-0.0225233
0.937	-0.0574088		0.929	-0.0800053		0.929	-0.0127118		0.929	-0.0230188
0.938	-0.0561381		0.93	-0.077736		0.93	-0.0128148		0.93	-0.0235665
0.939	-0.0549663		0.931	-0.0756178		0.931	-0.0129129		0.931	-0.0241191
0.94	-0.0538999		0.932	-0.0737354		0.932	-0.013005		0.932	-0.0246288
0.941	-0.0529415		0.933	-0.072103		0.933	-0.0130992		0.933	-0.0250401
0.942	-0.0520786		0.934	-0.0706523		0.934	-0.0131977		0.934	-0.0253198
0.943	-0.0513309		0.935	-0.0692791		0.935	-0.0132944		0.935	-0.0254744
0.944	-0.0507565		0.936	-0.067868		0.936	-0.0133845		0.936	-0.0255409
0.945	-0.0503943		0.937	-0.0663011		0.937	-0.0134681		0.937	-0.0255422
0.946	-0.0502412		0.938	-0.0644651		0.938	-0.013546		0.938	-0.025473
0.947	-0.0502887		0.939	-0.0622711		0.939	-0.0136166		0.939	-0.0253751
0.948	-0.0505532		0.94	-0.0597097		0.94	-0.0136788		0.94	-0.025358
0.949	-0.051052		0.941	-0.0568777		0.941	-0.0137327		0.941	-0.025512
0.95	-0.0517834		0.942	-0.0539477		0.942	-0.0137801		0.942	-0.0258807
0.951	-0.0527523		0.943	-0.0511098		0.943	-0.0138258		0.943	-0.0265271
0.952	-0.053962		0.944	-0.0485254		0.944	-0.0138706		0.944	-0.027501
0.953	-0.0554014		0.945	-0.0463222		0.945	-0.0139077		0.945	-0.0287489
0.954	-0.0570689		0.946	-0.0445886		0.946	-0.0139368		0.946	-0.0301343
0.955	-0.0589515		0.947	-0.0433566		0.947	-0.0139679		0.947	-0.0314967
0.956	-0.0610198		0.948	-0.0426109		0.948	-0.014007		0.948	-0.0326874
0.957	-0.063267		0.949	-0.0422882		0.949	-0.0140576		0.949	-0.0336004
0.958	-0.0656783		0.95	-0.0422545		0.95	-0.0141327		0.95	-0.0341922
0.959	-0.0681888		0.951	-0.0423207		0.951	-0.0142432		0.951	-0.0344707
0.96	-0.0707351		0.952	-0.0423042		0.952	-0.0143834		0.952	-0.0344762
0.961	-0.0732979		0.953	-0.0420823		0.953	-0.01454		0.953	-0.0342629
0.962	-0.0758706		0.954	-0.0416181		0.954	-0.0147062		0.954	-0.0338794
0.963	-0.078441		0.955	-0.04092		0.955	-0.0148857		0.955	-0.033365
0.964	-0.0809937		0.956	-0.039995		0.956	-0.0150824		0.956	-0.0327682
0.965	-0.0835057		0.957	-0.0388961		0.957	-0.0152921		0.957	-0.0321693
0.966	-0.0859538		0.958	-0.0377478		0.958	-0.0155099		0.958	-0.0316936
0.967	-0.0883166		0.959	-0.0366838		0.959	-0.0157361		0.959	-0.0314816
0.968	-0.0905684		0.96	-0.0358122		0.96	-0.0159681		0.96	-0.0315939
0.969	-0.0926815		0.961	-0.0352037		0.961	-0.0161929		0.961	-0.0319556
0.97	-0.0946339		0.962	-0.034883		0.962	-0.0164005		0.962	-0.0324332
0.971	-0.096422		0.963	-0.0348133		0.963	-0.0165962		0.963	-0.0329195
0.972	-0.0980444		0.964	-0.0348601		0.964	-0.0167857		0.964	-0.0333343
0.973	-0.0994711		0.965	-0.0348294		0.965	-0.0169712		0.965	-0.0336088
0.974	-0.100668		0.966	-0.0345551		0.966	-0.0171625		0.966	-0.0336876
0.975	-0.101643		0.967	-0.0339225		0.967	-0.0173657		0.967	-0.0335235
0.976	-0.102423		0.968	-0.0328626		0.968	-0.01757		0.968	-0.0330797
0.977	-0.103013		0.969	-0.0313722		0.969	-0.0177568		0.969	-0.0323644
0.978	-0.103401		0.97	-0.0295355		0.97	-0.0179195		0.97	-0.0314389
0.979	-0.103564		0.971	-0.0275048		0.971	-0.0180621		0.971	-0.0303689
0.98	-0.103467		0.972	-0.0254451		0.972	-0.0181803		0.972	-0.0292151
0.981	-0.103101		0.973	-0.0234855		0.973	-0.0182584		0.973	-0.0280832
0.982	-0.102519		0.974	-0.0216967		0.974	-0.0182809		0.974	-0.0271005
0.983	-0.101809		0.975	-0.0201006		0.975	-0.0182436		0.975	-0.0263355
0.984	-0.101047		0.976	-0.018697		0.976	-0.0181493		0.976	-0.0257968
0.985	-0.100299		0.977	-0.0174704		0.977	-0.0179966		0.977	-0.0254816
0.986	-0.099619		0.978	-0.016382		0.978	-0.0177893		0.978	-0.0253603
0.987	-0.0990241		0.979	-0.0153536		0.979	-0.0175357		0.979	-0.0253365
0.988	-0.0984881		0.98	-0.0142858		0.98	-0.017237		0.98	-0.0253021
0.989	-0.0979771		0.981	-0.0131295		0.981	-0.0168994		0.981	-0.0252146
0.99	-0.0974939		0.982	-0.0119016		0.982	-0.0165439		0.982	-0.0250865
0.991	-0.0970855		0.983	-0.010637		0.983	-0.0161901		0.983	-0.0249348
0.992	-0.0968043		0.984	-0.00938404		0.984	-0.0158457		0.984	-0.024801
0.993	-0.0966798		0.985	-0.00824189		0.985	-0.015511		0.985	-0.0247761
0.994	-0.0966938		0.986	-0.00734368		0.986	-0.0151854		0.986	-0.0249224
0.995	-0.0967787		0.987	-0.00676039		0.987	-0.0148707		0.987	-0.0252241
0.996	-0.0968729		0.988	-0.0064647		0.988	-0.0145746		0.988	-0.0256321
0.997	-0.0969582		0.989	-0.00639924		0.989	-0.0143052		0.989	-0.0260891
0.998	-0.0970408		0.99	-0.00650052		0.99	-0.0140655		0.99	-0.0265105
0.999	-0.0971335		0.991	-0.0066749		0.991	-0.0138555		0.991	-0.0268259
1	-0.0972504		0.992	-0.00680769		0.992	-0.0136787		0.992	-0.027075
1.001	-0.0974274		0.993	-0.00679154		0.993	-0.0135432		0.993	-0.0273284
1.002	-0.0977358		0.994	-0.00657117		0.994	-0.0134546		0.994	-0.0275653
1.003	-0.0982222		0.995	-0.00618023		0.995	-0.0134091		0.995	-0.0277678
1.004	-0.0988624		0.996	-0.00571062		0.996	-0.013395		0.996	-0.0279355
1.005	-0.0995952		0.997	-0.00523419		0.997	-0.0134025		0.997	-0.0279915
1.006	-0.100399		0.998	-0.00479256		0.998	-0.0134262		0.998	-0.0278642
1.007	-0.101308		0.999	-0.00443971		0.999	-0.0134612		0.999	-0.0275674
1.008	-0.102338		1	-0.00423368		1	-0.0135003		1	-0.0271564
1.009	-0.103454		1.001	-0.00422405		1.001	-0.0135335		1.001	-0.0266948
1.01	-0.104602		1.002	-0.00444359		1.002	-0.0135488		1.002	-0.0262213
1.011	-0.105715		1.003	-0.00484717		1.003	-0.0135378		1.003	-0.0256893
1.012	-0.106718		1.004	-0.00528606		1.004	-0.0134988		1.004	-0.0250096
1.013	-0.10756		1.005	-0.00557187		1.005	-0.0134347		1.005	-0.024209
1.014	-0.10823		1.006	-0.00555576		1.006	-0.0133488		1.006	-0.0234678
1.015	-0.108739		1.007	-0.00519202		1.007	-0.0132388		1.007	-0.0229262
1.016	-0.109074		1.008	-0.00453777		1.008	-0.0130981		1.008	-0.0225372
1.017	-0.109183		1.009	-0.00369142		1.009	-0.0129287		1.009	-0.0221907
1.018	-0.109025		1.01	-0.00275473		1.01	-0.0127426		1.01	-0.0218486
1.019	-0.108594		1.011	-0.00181579		1.011	-0.0125491		1.011	-0.0215183
1.02	-0.107894		1.012	-0.000946615		1.012	-0.0123484		1.012	-0.02121
1.021	-0.106957		1.013	-0.000213549		1.013	-0.0121331		1.013	-0.0209036
1.022	-0.10587		1.014	0.000324579		1.014	-0.0118997		1.014	-0.0205455
1.023	-0.104743		1.015	0.000642547		1.015	-0.0116651		1.015	-0.0201021
1.024	-0.103688		1.016	0.000772015		1.016	-0.0114555		1.016	-0.0195809
1.025	-0.102813		1.017	0.000774889		1.017	-0.0112794		1.017	-0.0190105
1.026	-0.1022		1.018	0.000723005		1.018	-0.0111202		1.018	-0.0184277
1.027	-0.101893		1.019	0.000726907		1.019	-0.0109535		1.019	-0.0178709
1.028	-0.101905		1.02	0.000916236		1.02	-0.0107657		1.02	-0.0173645
1.029	-0.102217		1.021	0.00134875		1.021	-0.0105568		1.021	-0.0169025
1.03	-0.102797		1.022	0.00197572		1.022	-0.0103278		1.022	-0.0164715
1.031	-0.103596		1.023	0.00270119		1.023	-0.0100721		1.023	-0.0160961
1.032	-0.10454		1.024	0.00345506		1.024	-0.00977793		1.024	-0.0158515
1.033	-0.105587		1.025	0.00421111		1.025	-0.00943476		1.025	-0.0158729
1.034	-0.10674		1.026	0.00495147		1.026	-0.00904341		1.026	-0.0163325
1.035	-0.107998		1.027	0.00563388		1.027	-0.00862189		1.027	-0.0174256
1.036	-0.109355		1.028	0.00616736		1.028	-0.00819359		1.028	-0.0194153
1.037	-0.110829		1.029	0.00643256		1.029	-0.00777344		1.029	-0.0224994
1.038	-0.112496		1.03	0.006372		1.03	-0.00737328		1.03	-0.0266512
1.039	-0.114519		1.031	0.00602826		1.031	-0.0070092		1.031	-0.0317566
1.04	-0.117145		1.032	0.00549208		1.032	-0.00669729		1.032	-0.03777
1.041	-0.120678		1.033	0.00485377		1.033	-0.00645565		1.033	-0.0446529
1.042	-0.12544		1.034	0.00415427		1.034	-0.00630582		1.034	-0.0523092
1.043	-0.131759		1.035	0.00333279		1.035	-0.00626484		1.035	-0.060718
1.044	-0.139993		1.036	0.00223704		1.036	-0.00634674		1.036	-0.0700223
1.045	-0.15052		1.037	0.000689784		1.037	-0.00657184		1.037	-0.0803477
1.046	-0.163718		1.038	-0.00146945		1.038	-0.00696676		1.038	-0.0916793
1.047	-0.179939		1.039	-0.00440564		1.039	-0.00755366		1.039	-0.103919
1.048	-0.199445		1.04	-0.00829997		1.04	-0.00834883		1.04	-0.116882
1.049	-0.222365		1.041	-0.0133247		1.041	-0.00936856		1.041	-0.130233
1.05	-0.248644		1.042	-0.0196023		1.042	-0.0106179		1.042	-0.143539
1.051	-0.278019		1.043	-0.0271527		1.043	-0.012083		1.043	-0.156487
1.052	-0.310043		1.044	-0.0358527		1.044	-0.0137433		1.044	-0.168971
1.053	-0.344123		1.045	-0.0454229		1.045	-0.0155816		1.045	-0.180939
1.054	-0.379537		1.046	-0.0554749		1.046	-0.0175825		1.046	-0.19225
1.055	-0.415457		1.047	-0.0655378		1.047	-0.0197289		1.047	-0.202603
1.056	-0.450997		1.048	-0.0750376		1.048	-0.0219998		1.048	-0.211442
1.057	-0.485225		1.049	-0.0833973		1.049	-0.0243716		1.049	-0.218009
1.058	-0.51718		1.05	-0.0902388		1.05	-0.0268141		1.05	-0.221591
1.059	-0.5459		1.051	-0.095508		1.051	-0.029287		1.051	-0.221672
1.06	-0.570467		1.052	-0.0994559		1.052	-0.0317494		1.052	-0.21787
1.061	-0.590104		1.053	-0.102454		1.053	-0.0341693		1.053	-0.209922
1.062	-0.604228		1.054	-0.10474		1.054	-0.0365166		1.054	-0.197919
1.063	-0.612431		1.055	-0.106304		1.055	-0.0387535		1.055	-0.182474
1.064	-0.614492		1.056	-0.106959		1.056	-0.0408365		1.056	-0.164509
1.065	-0.61039		1.057	-0.106459		1.057	-0.0427246		1.057	-0.144984
1.066	-0.60029		1.058	-0.104625		1.058	-0.0443798		1.058	-0.124772
1.067	-0.584514		1.059	-0.101441		1.059	-0.0457719		1.059	-0.104559
1.068	-0.563522		1.06	-0.0970493		1.06	-0.0468824		1.06	-0.0848386
1.069	-0.537875		1.061	-0.0916776		1.061	-0.0476968		1.061	-0.0659933
1.07	-0.508227		1.062	-0.0855425		1.062	-0.0481995		1.062	-0.0482868
1.071	-0.475302		1.063	-0.0787585		1.063	-0.0483793		1.063	-0.0318249
1.072	-0.439852		1.064	-0.0712837		1.064	-0.0482351		1.064	-0.0166045
1.073	-0.402639		1.065	-0.0630067		1.065	-0.0477765		1.065	-0.00259172
1.074	-0.364388		1.066	-0.0538959		1.066	-0.0470112		1.066	0.0102283
1.075	-0.325732		1.067	-0.0440416		1.067	-0.0459369		1.067	0.0218377
1.076	-0.287239		1.068	-0.0336322		1.068	-0.0445558		1.068	0.0322096
1.077	-0.249443		1.069	-0.0229088		1.069	-0.0428774		1.069	0.0412893
1.078	-0.212844		1.07	-0.0120956		1.07	-0.0409158		1.07	0.0490131
1.079	-0.177872		1.071	-0.00137434		1.071	-0.0386973		1.071	0.0554322
1.08	-0.144861		1.072	0.009079		1.072	-0.0362618		1.072	0.0606858
1.081	-0.114054		1.073	0.0190319		1.073	-0.0336524		1.073	0.0648572
1.082	-0.0856187		1.074	0.0281602		1.074	-0.0309028		1.074	0.0680142
1.083	-0.05966		1.075	0.0360919		1.075	-0.0280345		1.075	0.070286
1.084	-0.0362317		1.076	0.0424793		1.076	-0.0250706		1.076	0.0718337
1.085	-0.0153304		1.077	0.0470559		1.077	-0.0220388		1.077	0.0728566
1.086	0.00307456		1.078	0.049681		1.078	-0.0189613		1.078	0.073598
1.087	0.0190267		1.079	0.0503436		1.079	-0.0158593		1.079	0.0743284
1.088	0.0326229		1.08	0.0491376		1.08	-0.0127606		1.08	0.0753126
1.089	0.044037		1.081	0.0462496		1.081	-0.00969308		1.081	0.0766846
1.09	0.0534698		1.082	0.0419503		1.082	-0.00668859		1.082	0.0783632
1.091	0.0610964		1.083	0.0365827		1.083	-0.00378473		1.083	0.0801288
1.092	0.0670612		1.084	0.0305244		1.084	-0.00101479		1.084	0.0817678
1.093	0.071497		1.085	0.0241306		1.085	0.00159692		1.085	0.0831565
1.094	0.0745526		1.086	0.0177359		1.086	0.00403478		1.086	0.0842123
1.095	0.0764039		1.087	0.0116544		1.087	0.00628767		1.087	0.0848156
1.096	0.0772321		1.088	0.006118		1.088	0.00834486		1.088	0.084826
1.097	0.077191		1.089	0.00127153		1.089	0.0102036		1.089	0.0841415
1.098	0.076413		1.09	-0.00280016		1.09	0.0118735		1.09	0.0827157
1.099	0.075028		1.091	-0.00606426		1.091	0.0133618		1.091	0.0805425
1.1	0.0731567		1.092	-0.00850597		1.092	0.0146585		1.092	0.0776535
1.101	0.0709238		1.093	-0.0101256		1.093	0.0157478		1.093	0.0741291
1.102	0.0684553		1.094	-0.0109587		1.094	0.016628		1.094	0.0701151
1.103	0.065824		1.095	-0.0110429		1.095	0.0173104		1.095	0.065824
1.104	0.0630384		1.096	-0.0103734		1.096	0.0178059		1.096	0.0614705
1.105	0.0601127		1.097	-0.0089156		1.097	0.0181249		1.097	0.0572008
1.106	0.0571014		1.098	-0.00665215		1.098	0.0182826		1.098	0.0531066
1.107	0.0540537		1.099	-0.00362653		1.099	0.018297		1.099	0.0492689
1.108	0.0509824		1.1	5.81674e-05		1.1	0.0181864		1.1	0.0457376
1.109	0.0478906		1.101	0.00428152		1.101	0.0179705		1.101	0.0424742
1.11	0.0447991		1.102	0.00889983		1.102	0.0176602		1.102	0.0393891
1.111	0.0417472		1.103	0.0137228		1.103	0.0172582		1.103	0.0365244
1.112	0.0387777		1.104	0.0185209		1.104	0.0167713		1.104	0.0342607
1.113	0.035915		1.105	0.0230009		1.105	0.0162101		1.105	0.0332536
1.114	0.0331689		1.106	0.0268359		1.106	0.0155882		1.106	0.0340846
1.115	0.0305709		1.107	0.0298028		1.107	0.0149243		1.107	0.0368735
1.116	0.0281888		1.108	0.0318431		1.108	0.0142244		1.108	0.0409345
1.117	0.0261078		1.109	0.0330183		1.109	0.013463		1.109	0.0445571
1.118	0.0244407		1.11	0.0334572		1.11	0.0125898		1.11	0.0455008
1.119	0.0234216		1.111	0.0333095		1.111	0.011552		1.111	0.0424919
1.12	0.0236359		1.112	0.0327233		1.112	0.0103119		1.112	0.0361751
1.121	0.0263628		1.113	0.0318308		1.113	0.008853		1.113	0.0283426
1.122	0.033766		1.114	0.0307076		1.114	0.0071804		1.114	0.0207014
1.123	0.0486559		1.115	0.0293514		1.115	0.00532361		1.115	0.0142943
1.124	0.073941		1.116	0.0277702		1.116	0.00333283		1.116	0.00936312
1.125	0.112059		1.117	0.0261396		1.117	0.00126848		1.117	0.00551793
1.126	0.164591		1.118	0.0248404		1.118	-0.000802819		1.118	0.00216542
1.127	0.232135		1.119	0.024338		1.119	-0.00280756		1.119	-0.00116125
1.128	0.314315		1.12	0.0250859		1.12	-0.00467228		1.12	-0.00475134
1.129	0.409871		1.121	0.0275427		1.121	-0.00633563		1.121	-0.00872673
1.13	0.516841		1.122	0.0322		1.122	-0.00775353		1.122	-0.0129547
1.131	0.632747		1.123	0.0395597		1.123	-0.0088953		1.123	-0.0170182
1.132	0.754746		1.124	0.0501219		1.124	-0.00973553		1.124	-0.0204556
1.133	0.879816		1.125	0.0643889		1.125	-0.0102545		1.125	-0.0233099
1.134	1.0049		1.126	0.082892		1.126	-0.01044		1.126	-0.0265233
1.135	1.12702		1.127	0.106196		1.127	-0.0102872		1.127	-0.0313713
1.136	1.24345		1.128	0.134746		1.128	-0.00980648		1.128	-0.0382313
1.137	1.3518		1.129	0.168624		1.129	-0.00902455		1.129	-0.0462037
1.138	1.45003		1.13	0.20745		1.13	-0.00797675		1.13	-0.0539486
1.139	1.53644		1.131	0.250492		1.131	-0.00669679		1.131	-0.060466
1.14	1.60972		1.132	0.296873		1.132	-0.00520795		1.132	-0.06519
1.141	1.66906		1.133	0.345779		1.133	-0.00353127		1.133	-0.0678003
1.142	1.71408		1.134	0.396547		1.134	-0.00169058		1.134	-0.0681479
1.143	1.74486		1.135	0.448568		1.135	0.000292377		1.135	-0.0664281
1.144	1.76182		1.136	0.501146		1.136	0.00238975		1.136	-0.0633185
1.145	1.76568		1.137	0.55345		1.137	0.00456385		1.137	-0.0597858
1.146	1.75742		1.138	0.604548		1.138	0.00677473		1.138	-0.0566736
1.147	1.73826		1.139	0.653547		1.139	0.00897804		1.139	-0.0543356
1.148	1.70952		1.14	0.6998		1.14	0.0111261		1.14	-0.0526143
1.149	1.67262		1.141	0.742984		1.141	0.0131746		1.141	-0.0511925
1.15	1.62892		1.142	0.782984		1.142	0.015083		1.142	-0.0498405
1.151	1.57974		1.143	0.819715		1.143	0.0168153		1.143	-0.0483141
1.152	1.52637		1.144	0.852969		1.144	0.0183418		1.144	-0.046291
1.153	1.47003		1.145	0.882354		1.145	0.0196417		1.145	-0.0435235
1.154	1.41183		1.146	0.9074		1.146	0.0207045		1.146	-0.0398966
1.155	1.35267		1.147	0.927786		1.147	0.0215284		1.147	-0.0353441
1.156	1.29333		1.148	0.94351		1.148	0.0221127		1.148	-0.0299447
1.157	1.23446		1.149	0.954881		1.149	0.0224571		1.149	-0.0241294
1.158	1.1766		1.15	0.962348		1.15	0.0225747		1.15	-0.0186634
1.159	1.12017		1.151	0.966314		1.151	0.0224924		1.151	-0.0143863
1.16	1.06551		1.152	0.967079		1.152	0.0222344		1.152	-0.0118535
1.161	1.01288		1.153	0.964887		1.153	0.0218207		1.153	-0.0111695
1.162	0.962474		1.154	0.959942		1.154	0.0212718		1.154	-0.0121195
1.163	0.914398		1.155	0.952439		1.155	0.0206008		1.155	-0.0143728
1.164	0.868677		1.156	0.942616		1.156	0.0198116		1.156	-0.0176086
1.165	0.825325		1.157	0.93072		1.157	0.0189117		1.157	-0.0214543
1.166	0.784345		1.158	0.916973		1.158	0.0179198		1.158	-0.0253446
1.167	0.745676		1.159	0.901593		1.159	0.0168643		1.159	-0.0286166
1.168	0.709191		1.16	0.884786		1.16	0.0157762		1.16	-0.0307774
1.169	0.674742		1.161	0.866722		1.161	0.014685		1.161	-0.0316163
1.17	0.642165		1.162	0.847571		1.162	0.0136187		1.162	-0.0311376
1.171	0.611287		1.163	0.827567		1.163	0.0126028		1.163	-0.0295027
1.172	0.581966		1.164	0.807018		1.164	0.0116565		1.164	-0.0269838
1.173	0.554112		1.165	0.786273		1.165	0.0107903		1.165	-0.0238868
1.174	0.527641		1.166	0.765652		1.166	0.0100115		1.166	-0.0205149
1.175	0.50245		1.167	0.745386		1.167	0.00932953		1.167	-0.0171335
1.176	0.478422		1.168	0.725593		1.168	0.00874736		1.168	-0.0139118
1.177	0.45545		1.169	0.706298		1.169	0.00825855		1.169	-0.0109637
1.178	0.433455		1.17	0.687449		1.17	0.00785504		1.17	-0.00841972
1.179	0.412362		1.171	0.66896		1.171	0.00753512		1.171	-0.00640203
1.18	0.392099		1.172	0.650735		1.172	0.00730359		1.172	-0.00496063
1.181	0.372623		1.173	0.632669		1.173	0.00715801		1.173	-0.00408712
1.182	0.353899		1.174	0.614653		1.174	0.00708741		1.174	-0.00375764
1.183	0.335875		1.175	0.596625		1.175	0.00708416		1.175	-0.00387534
1.184	0.318495		1.176	0.578627		1.176	0.00713912		1.176	-0.00423708
1.185	0.301711		1.177	0.560794		1.177	0.00723762		1.177	-0.00463809
1.186	0.285457		1.178	0.543311		1.178	0.00736943		1.178	-0.00497512
1.187	0.269668		1.179	0.526385		1.179	0.00752909		1.179	-0.00519776
1.188	0.254303		1.18	0.510189		1.18	0.00770769		1.18	-0.00523035
1.189	0.239337		1.181	0.494807		1.181	0.00789915		1.181	-0.00502611
1.19	0.224783		1.182	0.480251		1.182	0.0081073		1.182	-0.00462266
1.191	0.210679		1.183	0.466485		1.183	0.00832982		1.183	-0.00415191
1.192	0.197029		1.184	0.453419		1.184	0.00855209		1.184	-0.00381669
1.193	0.18379		1.185	0.440926		1.185	0.00876207		1.185	-0.00375315
1.194	0.170894		1.186	0.428863		1.186	0.00895179		1.186	-0.00393769
1.195	0.158225		1.187	0.417091		1.187	0.00911131		1.187	-0.00427018
1.196	0.145651		1.188	0.405521		1.188	0.00922956		1.188	-0.00467153
1.197	0.133069		1.189	0.394101		1.189	0.00929852		1.189	-0.00507184
1.198	0.120437		1.19	0.382796		1.19	0.00931935		1.19	-0.00535646
1.199	0.10777		1.191	0.371609		1.191	0.00929981		1.191	-0.00540138
1.2	0.095141		1.192	0.360596		1.192	0.00924201		1.192	-0.0051645
1.201	0.0826821		1.193	0.349878		1.193	0.00914034		1.193	-0.00470569
1.202	0.0705681		1.194	0.33962		1.194	0.0089946		1.194	-0.00411578
1.203	0.0589727		1.195	0.329987		1.195	0.00881561		1.195	-0.00345601
1.204	0.0480362		1.196	0.32108		1.196	0.00861353		1.196	-0.002804
1.205	0.0378744		1.197	0.31292		1.197	0.00838831		1.197	-0.00226125
1.206	0.0286279		1.198	0.305461		1.198	0.0081342		1.198	-0.00187595
1.207	0.0204503		1.199	0.298575		1.199	0.00784546		1.199	-0.00167251
1.208	0.0134155		1.2	0.29209		1.2	0.00752185		1.2	-0.00170323
1.209	0.00751157		1.201	0.285843		1.201	0.00717393		1.201	-0.00199317
1.21	0.00271565		1.202	0.279674		1.202	0.00681566		1.202	-0.0025048
1.211	-0.000979905		1.203	0.273399		1.203	0.00645825		1.203	-0.00313207
1.212	-0.00358073		1.204	0.266865		1.204	0.00611018		1.204	-0.00372012
1.213	-0.00513876		1.205	0.260012		1.205	0.00577421		1.205	-0.0041819
1.214	-0.00577888		1.206	0.252854		1.206	0.00545609		1.206	-0.00454571
1.215	-0.00562775		1.207	0.245446		1.207	0.0051727		1.207	-0.00483878
1.216	-0.00477047		1.208	0.237939		1.208	0.00493867		1.208	-0.00500816
1.217	-0.0032957		1.209	0.230558		1.209	0.00475719		1.209	-0.00497012
1.218	-0.00131533		1.21	0.223525		1.21	0.00462543		1.21	-0.00467572
1.219	0.0010499		1.211	0.216995		1.211	0.00454148		1.211	-0.00410521
1.22	0.0036689		1.212	0.211004		1.212	0.00450579		1.212	-0.00326161
1.221	0.00640326		1.213	0.205481		1.213	0.00451326		1.213	-0.00221396
1.222	0.00912826		1.214	0.20031		1.214	0.00455651		1.214	-0.00105821
1.223	0.0117553		1.215	0.195372		1.215	0.00464304		1.215	0.00016864
1.224	0.0142143		1.216	0.190565		1.216	0.00479217		1.216	0.00146795
1.225	0.0164328		1.217	0.185821		1.217	0.00501811		1.217	0.00283194
1.226	0.0183743		1.218	0.181066		1.218	0.00532828		1.218	0.00424935
1.227	0.0200465		1.219	0.176204		1.219	0.00572539		1.219	0.00571105
1.228	0.0214524		1.22	0.171162		1.22	0.00620707		1.22	0.00717417
1.229	0.0225744		1.221	0.165923		1.221	0.00677591		1.221	0.00853012
1.23	0.0233871		1.222	0.160532		1.222	0.00744344		1.222	0.00965057
1.231	0.0238716		1.223	0.155082		1.223	0.00821842		1.223	0.0104656
1.232	0.0240103		1.224	0.149677		1.224	0.00909695		1.224	0.0109972
1.233	0.0237806		1.225	0.144416		1.225	0.010063		1.225	0.0112995
1.234	0.0231674		1.226	0.139389		1.226	0.0110947		1.226	0.0113535
1.235	0.0221777		1.227	0.13467		1.227	0.0121695		1.227	0.0111107
1.236	0.0208445		1.228	0.130308		1.228	0.0132663		1.228	0.0106116
1.237	0.0191953		1.229	0.126306		1.229	0.0143616		1.229	0.00993102
1.238	0.0172304		1.23	0.12261		1.23	0.0154316		1.23	0.00910857
1.239	0.0149494		1.231	0.119136		1.231	0.0164671		1.231	0.00820527
1.24	0.0123612		1.232	0.115796		1.232	0.0174684		1.232	0.00730022
1.241	0.00948598		1.233	0.112522		1.233	0.0184289		1.233	0.00643637
1.242	0.00636083		1.234	0.109262		1.234	0.0193373		1.234	0.00560868
1.243	0.00303748		1.235	0.105968		1.235	0.0201793		1.235	0.00474193
1.244	-0.000405496		1.236	0.102611		1.236	0.0209358		1.236	0.00376609
1.245	-0.00388734		1.237	0.0991931		1.237	0.0215971		1.237	0.00276617
1.246	-0.00738625		1.238	0.0957395		1.238	0.0221706		1.238	0.00191537
1.247	-0.0109345		1.239	0.0922984		1.239	0.0226695		1.239	0.0012704
1.248	-0.0145635		1.24	0.0889499		1.24	0.0230997		1.24	0.00072861
1.249	-0.0182765		1.241	0.0857989		1.241	0.0234678		1.241	0.00015282
1.25	-0.0220525		1.242	0.0829292		1.242	0.0237978		1.242	-0.000469565
1.251	-0.0258652		1.243	0.0803573		1.243	0.0241251		1.243	-0.00105069
1.252	-0.0296828		1.244	0.0780378		1.244	0.0244775		1.244	-0.00155436
1.253	-0.0334574		1.245	0.0758975		1.245	0.0248685		1.245	-0.00198038
1.254	-0.0371367		1.246	0.0738621		1.246	0.0253024		1.246	-0.00229786
1.255	-0.0406652		1.247	0.0718647		1.247	0.0257733		1.247	-0.00249393
1.256	-0.0439747		1.248	0.069841		1.248	0.026265		1.248	-0.00262157
1.257	-0.0470062		1.249	0.0677409		1.249	0.0267592		1.249	-0.00276693
1.258	-0.0497286		1.25	0.0655426		1.25	0.0272365		1.25	-0.00296087
1.259	-0.0521345		1.251	0.0632553		1.251	0.027677		1.251	-0.00314782
1.26	-0.0542408		1.252	0.0609145		1.252	0.0280667		1.252	-0.00325975
1.261	-0.0560822		1.253	0.0585759		1.253	0.0284068		1.253	-0.00325873
1.262	-0.0576755		1.254	0.0563166		1.254	0.028709		1.254	-0.00313433
1.263	-0.0589953		1.255	0.0542154		1.255	0.0289808		1.255	-0.00290046
1.264	-0.0600048		1.256	0.0523289		1.256	0.0292232		1.256	-0.00252936
1.265	-0.0606923		1.257	0.0506966		1.257	0.0294381		1.257	-0.00194287
1.266	-0.0610631		1.258	0.0493256		1.258	0.0296286		1.258	-0.00111986
1.267	-0.0611394		1.259	0.0481616		1.259	0.0297992		1.259	-0.0001481
1.268	-0.0609599		1.26	0.0471147		1.26	0.0299499		1.26	0.00085732
1.269	-0.0605528		1.261	0.0461128		1.261	0.0300828		1.261	0.0018553
1.27	-0.0599395		1.262	0.0451051		1.262	0.0302236		1.262	0.00286831
1.271	-0.0591487		1.263	0.0440333		1.263	0.0304089		1.263	0.00389755
1.272	-0.0582092		1.264	0.0428092		1.264	0.030649		1.264	0.00486963
1.273	-0.0571409		1.265	0.0413325		1.265	0.0309227		1.265	0.00568448
1.274	-0.0559647		1.266	0.0395577		1.266	0.0311954		1.266	0.00631333
1.275	-0.0547083		1.267	0.0375242		1.267	0.0314378		1.267	0.00681412
1.276	-0.0533951		1.268	0.0353054		1.268	0.0316396		1.268	0.00725477
1.277	-0.0520438		1.269	0.0329611		1.269	0.0318014		1.269	0.00766367
1.278	-0.0506759		1.27	0.0305597		1.27	0.031923		1.27	0.00805637
1.279	-0.0493219		1.271	0.02821		1.271	0.0320039		1.271	0.00848217
1.28	-0.0480229		1.272	0.0260121		1.272	0.0320433		1.272	0.00897697
1.281	-0.0468318		1.273	0.0239974		1.273	0.032037		1.273	0.00948002
1.282	-0.0458057		1.274	0.0221294		1.274	0.0319738		1.274	0.00991302
1.283	-0.0449929		1.275	0.0203419		1.275	0.0318454		1.275	0.0102595
1.284	-0.0444359		1.276	0.0185955		1.276	0.0316525		1.276	0.0105292
1.285	-0.0441534		1.277	0.0168825		1.277	0.0313946		1.277	0.0107589
1.286	-0.0441219		1.278	0.0151793		1.278	0.0310717		1.278	0.0109777
1.287	-0.0443045		1.279	0.0134271		1.279	0.0306917		1.279	0.0111216
1.288	-0.0446705		1.28	0.0115519		1.28	0.0302702		1.28	0.0111062
1.289	-0.0451938		1.281	0.00951496		1.281	0.0298267		1.281	0.0109286
1.29	-0.0458554		1.282	0.0073503		1.282	0.0293713		1.282	0.0106023
1.291	-0.0466475		1.283	0.00514785		1.283	0.0289097		1.283	0.0101343
1.292	-0.0475729		1.284	0.00302379		1.284	0.0284596		1.284	0.00957312
1.293	-0.0486561		1.285	0.00109641		1.285	0.0280415		1.285	0.00896082
1.294	-0.0499421		1.286	-0.000562405		1.286	0.0276614		1.286	0.00832067
1.295	-0.0514391		1.287	-0.00195202		1.287	0.0273155		1.287	0.00771307
1.296	-0.0531026		1.288	-0.00312038		1.288	0.0269984		1.288	0.00720767
1.297	-0.0548937		1.289	-0.00414729		1.289	0.0267102		1.289	0.00681537
1.298	-0.0568018		1.29	-0.00512445		1.29	0.026463		1.29	0.00651187
1.299	-0.0588219		1.291	-0.00611917		1.291	0.0262652		1.291	0.00629776
1.3	-0.0609345		1.292	-0.00716749		1.292	0.0261076		1.292	0.0062069
1.301	-0.0630845		1.293	-0.00830127		1.293	0.0259726		1.293	0.00625201
1.302	-0.0652038		1.294	-0.00956057		1.294	0.0258482		1.294	0.00634297
1.303	-0.0672394		1.295	-0.0109605		1.295	0.0257351		1.295	0.00635517
1.304	-0.0691515		1.296	-0.0124726		1.296	0.0256467		1.296	0.0062733
1.305	-0.0709307		1.297	-0.0140651		1.297	0.025601		1.297	0.00613888
1.306	-0.0725761		1.298	-0.0157047		1.298	0.0256082		1.298	0.00596018
1.307	-0.074056		1.299	-0.0173137		1.299	0.0256724		1.299	0.0057425
1.308	-0.0753247		1.3	-0.018791		1.3	0.0258034		1.3	0.00551185
1.309	-0.0763433		1.301	-0.0200643		1.301	0.0260126		1.301	0.00532429
1.31	-0.0770783		1.302	-0.0211153		1.302	0.0262991		1.302	0.00527462
1.311	-0.0775107		1.303	-0.0219738		1.303	0.0266497		1.303	0.0054531
1.312	-0.0776403		1.304	-0.022683		1.304	0.0270436		1.304	0.00588394
1.313	-0.0774814		1.305	-0.0232889		1.305	0.0274638		1.305	0.00652862
1.314	-0.0770568		1.306	-0.023875		1.306	0.0279016		1.306	0.00731922
1.315	-0.0763795		1.307	-0.0245572		1.307	0.028345		1.307	0.00816672
1.316	-0.0754519		1.308	-0.0254119		1.308	0.0287797		1.308	0.00901692
1.317	-0.0742955		1.309	-0.0264404		1.309	0.0292013		1.309	0.00986687
1.318	-0.072974		1.31	-0.027612		1.31	0.0296116		1.31	0.0106734
1.319	-0.0715638		1.311	-0.0289098		1.311	0.0300061		1.311	0.0113819
1.32	-0.0701168		1.312	-0.0303229		1.312	0.0303745		1.312	0.0120196
1.321	-0.0686698		1.313	-0.0318046		1.313	0.0307053		1.313	0.0126415
1.322	-0.0672534		1.314	-0.0332526		1.314	0.0309838		1.314	0.0133018
1.323	-0.0658797		1.315	-0.0345436		1.315	0.0311983		1.315	0.0140438
1.324	-0.0645588		1.316	-0.0355714		1.316	0.0313478		1.316	0.0148309
1.325	-0.0633107		1.317	-0.0362633		1.317	0.0314369		1.317	0.0155732
1.326	-0.0621371		1.318	-0.0365953		1.318	0.031467		1.318	0.0162099
1.327	-0.0610076		1.319	-0.0366033		1.319	0.0314356		1.319	0.0167542
1.328	-0.05988		1.32	-0.0363756		1.32	0.0313471		1.32	0.0172591
1.329	-0.0587462		1.321	-0.0360272		1.321	0.0312175		1.321	0.0177114
1.33	-0.057658		1.322	-0.035678		1.322	0.0310588		1.322	0.0180508
1.331	-0.0566756		1.323	-0.0354325		1.323	0.0308687		1.323	0.0182673
1.332	-0.0558312		1.324	-0.0353598		1.324	0.0306405		1.324	0.0183653
1.333	-0.0551632		1.325	-0.0354995		1.325	0.0303724		1.325	0.0183166
1.334	-0.0547204		1.326	-0.0358735		1.326	0.0300687		1.326	0.0181306
1.335	-0.0545401		1.327	-0.0364722		1.327	0.0297359		1.327	0.0178834
1.336	-0.0546556		1.328	-0.03725		1.328	0.0293713		1.328	0.0176403
1.337	-0.0550786		1.329	-0.0381372		1.329	0.0289676		1.329	0.0174247
1.338	-0.0557832		1.33	-0.0390534		1.33	0.0285233		1.33	0.0172317
1.339	-0.0567478		1.331	-0.0399224		1.331	0.0280448		1.331	0.0170308
1.34	-0.0579696		1.332	-0.0406891		1.332	0.0275464		1.332	0.016802
1.341	-0.0594254		1.333	-0.0413366		1.333	0.0270439		1.333	0.016555
1.342	-0.0610833		1.334	-0.0419045		1.334	0.0265493		1.334	0.0162921
1.343	-0.0629461		1.335	-0.0424839		1.335	0.0260714		1.335	0.0160317
1.344	-0.065026		1.336	-0.0431688		1.336	0.025618		1.336	0.0158358
1.345	-0.0673074		1.337	-0.04402		1.337	0.0251963		1.337	0.0157257
1.346	-0.069766		1.338	-0.0450832		1.338	0.0248144		1.338	0.0156759
1.347	-0.0723894		1.339	-0.0463892		1.339	0.0244836		1.339	0.0156864
1.348	-0.0751821		1.34	-0.0479252		1.34	0.0242169		1.34	0.0157505
1.349	-0.0781518		1.341	-0.0496428		1.341	0.024022		1.341	0.0158468
1.35	-0.0812877		1.342	-0.0514746		1.342	0.0238988		1.342	0.0159998
1.351	-0.0845715		1.343	-0.0533277		1.343	0.0238451		1.343	0.0162408
1.352	-0.0879648		1.344	-0.0550821		1.344	0.0238633		1.344	0.0165616
1.353	-0.0913932		1.345	-0.0565988		1.345	0.0239547		1.345	0.0169509
1.354	-0.0947976		1.346	-0.0577606		1.346	0.0241164		1.346	0.0173788
1.355	-0.0981654		1.347	-0.0585382		1.347	0.0243487		1.347	0.0177735
1.356	-0.101483		1.348	-0.0590143		1.348	0.0246549		1.348	0.0180831
1.357	-0.104691		1.349	-0.059333		1.349	0.0250362		1.349	0.0183156
1.358	-0.1077		1.35	-0.0596171		1.35	0.0254909		1.35	0.018495
1.359	-0.11043		1.351	-0.0599362		1.351	0.026017		1.351	0.0186684
1.36	-0.112833		1.352	-0.0603258		1.352	0.0266056		1.352	0.018915
1.361	-0.114876		1.353	-0.0608197		1.353	0.0272413		1.353	0.0192761
1.362	-0.116541		1.354	-0.061466		1.354	0.027917		1.354	0.019759
1.363	-0.117831		1.355	-0.0622962		1.355	0.0286363		1.355	0.0203882
1.364	-0.118757		1.356	-0.0632911		1.356	0.0294		1.356	0.0212067
1.365	-0.119317		1.357	-0.064395		1.357	0.0301974		1.357	0.0222136
1.366	-0.11953		1.358	-0.0655263		1.358	0.031016		1.358	0.0233408
1.367	-0.119445		1.359	-0.0665534		1.359	0.0318496		1.359	0.0245101
1.368	-0.119096		1.36	-0.0673086		1.36	0.0326935		1.36	0.0256302
1.369	-0.118517		1.361	-0.0676794		1.361	0.033539		1.361	0.0266334
1.37	-0.11773		1.362	-0.0676819		1.362	0.0343762		1.362	0.0275259
1.371	-0.116719		1.363	-0.0674239		1.363	0.0352025		1.363	0.0283458
1.372	-0.115476		1.364	-0.0670237		1.364	0.036022		1.364	0.0291393
1.373	-0.114049		1.365	-0.066598		1.365	0.0368361		1.365	0.02992
1.374	-0.112525		1.366	-0.0662462		1.366	0.0376416		1.366	0.0306341
1.375	-0.110974		1.367	-0.066022		1.367	0.0384325		1.367	0.0312272
1.376	-0.109432		1.368	-0.0659715		1.368	0.0391978		1.368	0.031695
1.377	-0.107932		1.369	-0.0661575		1.369	0.0399182		1.369	0.032043
1.378	-0.106529		1.37	-0.0666322		1.37	0.0405729		1.37	0.0322639
1.379	-0.105283		1.371	-0.0673989		1.371	0.0411592		1.371	0.0323769
1.38	-0.104253		1.372	-0.0683846		1.372	0.0416931		1.372	0.0323929
1.381	-0.103494		1.373	-0.069478		1.373	0.0421835		1.373	0.0322862
1.382	-0.103047		1.374	-0.0705789		1.374	0.0426264		1.374	0.0320529
1.383	-0.102946		1.375	-0.071588		1.375	0.0430146		1.375	0.0317208
1.384	-0.103212		1.376	-0.0724233		1.376	0.0433376		1.376	0.031346
1.385	-0.103826		1.377	-0.0730766		1.377	0.0435893		1.377	0.0309544
1.386	-0.104803		1.378	-0.0736023		1.378	0.0437795		1.378	0.0304583
1.387	-0.106215		1.379	-0.0740616		1.379	0.0439271		1.379	0.0297611
1.388	-0.108089		1.38	-0.0745109		1.38	0.0440439		1.38	0.0288769
1.389	-0.110388		1.381	-0.075011		1.381	0.0441342		1.381	0.0278826
1.39	-0.113047		1.382	-0.0756239		1.382	0.0441984		1.382	0.0268463
1.391	-0.116012		1.383	-0.0764016		1.383	0.0442253		1.383	0.0257783
1.392	-0.119251		1.384	-0.0773638		1.384	0.0441956		1.384	0.0246061
1.393	-0.122747		1.385	-0.0784902		1.385	0.0440985		1.385	0.0232345
1.394	-0.1265		1.386	-0.0797112		1.386	0.0439355		1.386	0.0216143
1.395	-0.130528		1.387	-0.0809028		1.387	0.0437111		1.387	0.0197645
1.396	-0.134801		1.388	-0.0819537		1.388	0.043429		1.388	0.0177931
1.397	-0.139259		1.389	-0.0828207		1.389	0.0430965		1.389	0.0158343
1.398	-0.143879		1.39	-0.0835127		1.39	0.0427247		1.39	0.0139592
1.399	-0.148666		1.391	-0.0840865		1.391	0.0423212		1.391	0.0122135
1.4	-0.153571		1.392	-0.0846422		1.392	0.04189		1.392	0.0106429
1.401	-0.158486		1.393	-0.0852883		1.393	0.0414393		1.393	0.00925127
1.402	-0.163288		1.394	-0.0861163		1.394	0.0409869		1.394	0.00803397
1.403	-0.167868		1.395	-0.0871697		1.395	0.0405566		1.395	0.00705977
1.404	-0.172128		1.396	-0.088431		1.396	0.0401726		1.396	0.00644557
1.405	-0.176003		1.397	-0.0898749		1.397	0.0398515		1.397	0.00622474
1.406	-0.179455		1.398	-0.0914817		1.398	0.0395983		1.398	0.00634692
1.407	-0.182459		1.399	-0.0931814		1.399	0.0394153		1.399	0.00678787
1.408	-0.185005		1.4	-0.0948399		1.4	0.0393065		1.4	0.00755172
1.409	-0.187048		1.401	-0.0962908		1.401	0.0392677		1.401	0.00865322
1.41	-0.18849		1.402	-0.0973752		1.402	0.0392875		1.402	0.0101253
1.411	-0.189241		1.403	-0.0979919		1.403	0.0393581		1.403	0.0119639
1.412	-0.189248		1.404	-0.0981292		1.404	0.0394793		1.404	0.0141177
1.413	-0.188496		1.405	-0.0978505		1.405	0.0396487		1.405	0.0165238
1.414	-0.187		1.406	-0.0972718		1.406	0.0398608		1.406	0.0191146
1.415	-0.184799		1.407	-0.0965542		1.407	0.040111		1.407	0.0218299
1.416	-0.181946		1.408	-0.0958644		1.408	0.0403984		1.408	0.0245914
1.417	-0.178514		1.409	-0.095328		1.409	0.0407275		1.409	0.0272851
1.418	-0.174584		1.41	-0.0950237		1.41	0.0411099		1.41	0.0298433
1.419	-0.170238		1.411	-0.0949895		1.411	0.0415583		1.411	0.0322333
1.42	-0.165583		1.412	-0.095191		1.412	0.0420803		1.412	0.0343494
1.421	-0.160741		1.413	-0.0955021		1.413	0.0426801		1.413	0.0360476
1.422	-0.155836		1.414	-0.0957687		1.414	0.0433578		1.414	0.0372518
1.423	-0.150949		1.415	-0.095869		1.415	0.0441066		1.415	0.0379894
1.424	-0.146103		1.416	-0.0957162		1.416	0.0449147		1.416	0.0383764
1.425	-0.141328		1.417	-0.0952541		1.417	0.0457652		1.417	0.0385422
1.426	-0.136712		1.418	-0.0944901		1.418	0.0466403		1.418	0.0385873
1.427	-0.132336		1.419	-0.0935157		1.419	0.0475278		1.419	0.0386227
1.428	-0.128262		1.42	-0.0924562		1.42	0.0484162		1.42	0.038758
1.429	-0.124575		1.421	-0.091429		1.421	0.0492879		1.421	0.0390329
1.43	-0.121377		1.422	-0.090528		1.422	0.0501247		1.422	0.0393751
1.431	-0.1187		1.423	-0.089805		1.423	0.0509173		1.423	0.0396515
1.432	-0.116503		1.424	-0.0892869		1.424	0.051667		1.424	0.0397975
1.433	-0.114752		1.425	-0.089018		1.425	0.0523799		1.425	0.0398317
1.434	-0.113423		1.426	-0.0890528		1.426	0.0530605		1.426	0.0397562
1.435	-0.112491		1.427	-0.0893935		1.427	0.053709		1.427	0.0395404
1.436	-0.111964		1.428	-0.0899664		1.428	0.0543273		1.428	0.0392032
1.437	-0.111879		1.429	-0.0906591		1.429	0.0549243		1.429	0.0388231
1.438	-0.112233		1.43	-0.091375		1.43	0.0555079		1.43	0.0384436
1.439	-0.112965		1.431	-0.0920704		1.431	0.0560746		1.431	0.0380153
1.44	-0.113996		1.432	-0.0927507		1.432	0.0566058		1.432	0.0374655
1.441	-0.115292		1.433	-0.0934425		1.433	0.0570783		1.433	0.0368071
1.442	-0.116858		1.434	-0.094164		1.434	0.0574799		1.434	0.0360913
1.443	-0.1187		1.435	-0.0949355		1.435	0.0578133		1.435	0.035333
1.444	-0.120821		1.436	-0.095809		1.436	0.0580909		1.436	0.0345578
1.445	-0.123242		1.437	-0.0968372		1.437	0.0583289		1.437	0.0338014
1.446	-0.125982		1.438	-0.0980401		1.438	0.0585354		1.438	0.0330646
1.447	-0.129036		1.439	-0.0994253		1.439	0.0587068		1.439	0.0323051
1.448	-0.132377		1.44	-0.100987		1.44	0.0588454		1.44	0.0314766
1.449	-0.135972		1.441	-0.102677		1.441	0.0589606		1.441	0.0305794
1.45	-0.1398		1.442	-0.104373		1.442	0.0590505		1.442	0.0296159
1.451	-0.14386		1.443	-0.105885		1.443	0.059102		1.443	0.0285912
1.452	-0.148144		1.444	-0.107026		1.444	0.0591067		1.444	0.0276283
1.453	-0.152594		1.445	-0.107684		1.445	0.0590646		1.445	0.0269252
1.454	-0.157107		1.446	-0.107829		1.446	0.0589785		1.446	0.0265294
1.455	-0.161572		1.447	-0.107522		1.447	0.0588566		1.447	0.0263104
1.456	-0.165864		1.448	-0.1069		1.448	0.0587158		1.448	0.0261745
1.457	-0.169844		1.449	-0.10612		1.449	0.0585737		1.449	0.0261542
1.458	-0.173408		1.45	-0.105344		1.45	0.0584377		1.45	0.0263016
1.459	-0.17648		1.451	-0.104716		1.451	0.0583058		1.451	0.0266127
1.46	-0.178982		1.452	-0.104326		1.452	0.0581731		1.452	0.0270581
1.461	-0.18086		1.453	-0.104209		1.453	0.0580403		1.453	0.0276066
1.462	-0.182149		1.454	-0.104368		1.454	0.0579203		1.454	0.0281928
1.463	-0.182968		1.455	-0.10474		1.455	0.0578301		1.455	0.0287282
1.464	-0.183484		1.456	-0.105167		1.456	0.0577827		1.456	0.0291638
1.465	-0.183935		1.457	-0.105451		1.457	0.0577843		1.457	0.0295452
1.466	-0.184645		1.458	-0.105421		1.458	0.0578308		1.458	0.0299727
1.467	-0.185976		1.459	-0.104987		1.459	0.0579195		1.459	0.0304945
1.468	-0.188289		1.46	-0.104138		1.46	0.0580621		1.46	0.0311301
1.469	-0.191919		1.461	-0.102924		1.461	0.0582707		1.461	0.031904
1.47	-0.197143		1.462	-0.101455		1.462	0.0585469		1.462	0.0327834
1.471	-0.204166		1.463	-0.0998629		1.463	0.0588866		1.463	0.0336886
1.472	-0.213092		1.464	-0.0982727		1.464	0.0592851		1.464	0.0345415
1.473	-0.223913		1.465	-0.0967971		1.465	0.0597407		1.465	0.0352844
1.474	-0.236517		1.466	-0.0955416		1.466	0.0602561		1.466	0.0359043
1.475	-0.250661		1.467	-0.0946023		1.467	0.060833		1.467	0.0364408
1.476	-0.265986		1.468	-0.0940548		1.468	0.0614597		1.468	0.0369619
1.477	-0.282073		1.469	-0.0939274		1.469	0.0621125		1.469	0.0375177
1.478	-0.298463		1.47	-0.0941801		1.47	0.0627777		1.47	0.0381044
1.479	-0.314645		1.471	-0.0946859		1.471	0.0634602		1.471	0.0386615
1.48	-0.330088		1.472	-0.0952455		1.472	0.0641625		1.472	0.0391019
1.481	-0.344281		1.473	-0.0956534		1.473	0.0648711		1.473	0.0393458
1.482	-0.35678		1.474	-0.0957726		1.474	0.0655672		1.474	0.0393238
1.483	-0.367246		1.475	-0.0955647		1.475	0.0662407		1.475	0.0390055
1.484	-0.375468		1.476	-0.0950829		1.476	0.0668895		1.476	0.0384445
1.485	-0.381409		1.477	-0.0944485		1.477	0.0675067		1.477	0.0377314
1.486	-0.385315		1.478	-0.0938048		1.478	0.0680785		1.478	0.0369091
1.487	-0.387802		1.479	-0.0932803		1.479	0.0685902		1.479	0.0359346
1.488	-0.389778		1.48	-0.0929716		1.48	0.069028		1.48	0.0347245
1.489	-0.392195		1.481	-0.0929237		1.481	0.069379		1.481	0.0332834
1.49	-0.395861		1.482	-0.0931328		1.482	0.0696301		1.482	0.0317428
1.491	-0.401366		1.483	-0.0935625		1.483	0.0697747		1.483	0.030244
1.492	-0.409063		1.484	-0.0941376		1.484	0.0698224		1.484	0.0288598
1.493	-0.419073		1.485	-0.0947415		1.485	0.0697905		1.485	0.0276235
1.494	-0.431338		1.486	-0.0952439		1.486	0.06969		1.486	0.0265451
1.495	-0.445705		1.487	-0.095546		1.487	0.0695244		1.487	0.0256185
1.496	-0.462039		1.488	-0.0956197		1.488	0.069291		1.488	0.0248326
1.497	-0.480326		1.489	-0.0955076		1.489	0.0689882		1.489	0.0241621
1.498	-0.500641		1.49	-0.0952959		1.49	0.0686284		1.49	0.0236286
1.499	-0.522972		1.491	-0.0950972		1.491	0.0682373		1.491	0.0233059
1.5	-0.546917		1.492	-0.0950192		1.492	0.0678431		1.492	0.0231883
1.501	-0.571412		1.493	-0.0951249		1.493	0.0674685		1.493	0.0231721
1.502	-0.594717		1.494	-0.0954413		1.494	0.0671331		1.494	0.0231797
1.503	-0.614693		1.495	-0.095998		1.495	0.0668523		1.495	0.0232217
1.504	-0.6292		1.496	-0.096822		1.496	0.0666349		1.496	0.0233351
1.505	-0.636385		1.497	-0.0978969		1.497	0.0664904		1.497	0.0235126
1.506	-0.634828		1.498	-0.099137		1.498	0.0664254		1.498	0.0236932
1.507	-0.623662		1.499	-0.10038		1.499	0.0664404		1.499	0.023803
1.508	-0.602662		1.5	-0.101406		1.5	0.0665367		1.5	0.0238317
1.509	-0.572207		1.501	-0.102001		1.501	0.0667205		1.501	0.0238488
1.51	-0.533164		1.502	-0.102031		1.502	0.0670021		1.502	0.0239385
1.511	-0.48676		1.503	-0.101488		1.503	0.0673903		1.503	0.0241265
1.512	-0.434455		1.504	-0.100485		1.504	0.0678875		1.504	0.0243793
1.513	-0.377841		1.505	-0.0991766		1.505	0.0684962		1.505	0.0246551
1.514	-0.318533		1.506	-0.0977042		1.506	0.0692196		1.506	0.0249315
1.515	-0.258072		1.507	-0.0962058		1.507	0.0700531		1.507	0.0252289
1.516	-0.197908		1.508	-0.0948103		1.508	0.0709793		1.508	0.0255687
1.517	-0.139403		1.509	-0.093621		1.509	0.0719686		1.509	0.025945
1.518	-0.0837701		1.51	-0.0927141		1.51	0.0729894		1.51	0.0263798
1.519	-0.0320127		1.511	-0.0921214		1.511	0.0740167		1.511	0.0268834
1.52	0.0150688		1.512	-0.0918146		1.512	0.0750257		1.512	0.0274274
1.521	0.0568755		1.513	-0.091701		1.513	0.0759945		1.513	0.0280139
1.522	0.0930321		1.514	-0.0916347		1.514	0.0769143		1.514	0.0286336
1.523	0.12337		1.515	-0.0914644		1.515	0.0777809		1.515	0.0292391
1.524	0.147899		1.516	-0.0910904		1.516	0.0785833		1.516	0.0298277
1.525	0.16679		1.517	-0.0904874		1.517	0.0793139		1.517	0.0304405
1.526	0.180352		1.518	-0.0896821		1.518	0.0799757		1.518	0.0311076
1.527	0.188983		1.519	-0.0887263		1.519	0.080574		1.519	0.0318259
1.528	0.19311		1.52	-0.08769		1.52	0.08111		1.52	0.0325314
1.529	0.193186		1.521	-0.0866511		1.521	0.081582		1.521	0.0331312
1.53	0.189718		1.522	-0.0856974		1.522	0.0819852		1.522	0.0335873
1.531	0.183256		1.523	-0.0849165		1.523	0.0823187		1.523	0.0338918
1.532	0.17434		1.524	-0.0843549		1.524	0.0825915		1.524	0.0340005
1.533	0.163501		1.525	-0.0840309		1.525	0.082813		1.525	0.0338805
1.534	0.151235		1.526	-0.083948		1.526	0.0829801		1.526	0.0335551
1.535	0.137979		1.527	-0.0840468		1.527	0.0830849		1.527	0.0330963
1.536	0.12413		1.528	-0.0842174		1.528	0.0831277		1.528	0.0326242
1.537	0.110046		1.529	-0.0843646		1.529	0.0831148		1.529	0.0322377
1.538	0.0960376		1.53	-0.0844254		1.53	0.0830479		1.53	0.0319575
1.539	0.0823626		1.531	-0.0843726		1.531	0.0829227		1.531	0.0317866
1.54	0.0692164		1.532	-0.0842202		1.532	0.0827341		1.532	0.031701
1.541	0.056712		1.533	-0.0840199		1.533	0.0824875		1.533	0.0315955
1.542	0.0449088		1.534	-0.0838483		1.534	0.0821999		1.534	0.031386
1.543	0.0338482		1.535	-0.0837796		1.535	0.0818864		1.535	0.0310834
1.544	0.0235253		1.536	-0.0838638		1.536	0.0815585		1.536	0.0306615
1.545	0.0139		1.537	-0.0841331		1.537	0.0812247		1.537	0.0300158
1.546	0.00494007		1.538	-0.0846242		1.538	0.0808887		1.538	0.0291083
1.547	-0.00339985		1.539	-0.0853857		1.539	0.0805594		1.539	0.0279714
1.548	-0.0111881		1.54	-0.0864418		1.54	0.0802547		1.54	0.0266074
1.549	-0.018467		1.541	-0.0877359		1.541	0.0799856		1.541	0.0250264
1.55	-0.0252448		1.542	-0.0891309		1.542	0.0797463		1.542	0.0233366
1.551	-0.0315335		1.543	-0.0904509		1.543	0.0795262		1.543	0.0217085
1.552	-0.0373237		1.544	-0.0914918		1.544	0.0793245		1.544	0.0202603
1.553	-0.0425694		1.545	-0.0920418		1.545	0.07915		1.545	0.0190514
1.554	-0.0472517		1.546	-0.0919738		1.546	0.0790113		1.546	0.0181424
1.555	-0.0514044		1.547	-0.0913261		1.547	0.0789132		1.547	0.0175683
1.556	-0.0550553		1.548	-0.0902566		1.548	0.0788558		1.548	0.0173141
1.557	-0.0581915		1.549	-0.088954		1.549	0.0788407		1.549	0.0173954
1.558	-0.0608083		1.55	-0.0876012		1.55	0.0788716		1.55	0.0178659
1.559	-0.0629404		1.551	-0.0863525		1.551	0.0789488		1.551	0.0186852
1.56	-0.0646252		1.552	-0.085299		1.552	0.0790692		1.552	0.019725
1.561	-0.0658995		1.553	-0.0844827		1.553	0.0792293		1.553	0.0209004
1.562	-0.0668102		1.554	-0.0839592		1.554	0.07943		1.554	0.022198
1.563	-0.0673637		1.555	-0.0838068		1.555	0.0796722		1.555	0.023616
1.564	-0.0675173		1.556	-0.0840792		1.556	0.07995		1.556	0.0251263
1.565	-0.0672535		1.557	-0.0847542		1.557	0.0802567		1.557	0.0267
1.566	-0.0666008		1.558	-0.0857248		1.558	0.0805981		1.558	0.0282671
1.567	-0.0655985		1.559	-0.086853		1.559	0.0809865		1.559	0.0296943
1.568	-0.064301		1.56	-0.0880048		1.56	0.0814226		1.56	0.0309037
1.569	-0.0627632		1.561	-0.0890529		1.561	0.0818954		1.561	0.0318976
1.57	-0.061002		1.562	-0.0898977		1.562	0.0823885		1.562	0.0326592
1.571	-0.0590329		1.563	-0.0904909		1.563	0.0828798		1.563	0.0331639
1.572	-0.0569149		1.564	-0.0908219		1.564	0.0833516		1.564	0.0334452
1.573	-0.0547062		1.565	-0.0909035		1.565	0.0838022		1.565	0.0335595
1.574	-0.0524382		1.566	-0.0907945		1.566	0.0842396		1.566	0.0335456
1.575	-0.0501636		1.567	-0.0906002		1.567	0.0846768		1.567	0.0334639
1.576	-0.0479657		1.568	-0.0904182		1.568	0.0851213		1.568	0.033398
1.577	-0.0459174		1.569	-0.0902783		1.569	0.0855593		1.569	0.0333958
1.578	-0.0440753		1.57	-0.0901477		1.57	0.0859752		1.57	0.0334702
1.579	-0.0424973		1.571	-0.089996		1.571	0.0863795		1.571	0.0336403
1.58	-0.0412181		1.572	-0.0897956		1.572	0.0867948		1.572	0.0338864
1.581	-0.0402133		1.573	-0.0894629		1.573	0.0872243		1.573	0.0341118
1.582	-0.0394306		1.574	-0.0888837		1.574	0.0876571		1.574	0.0342111
1.583	-0.0388456		1.575	-0.0879998		1.575	0.0880836		1.575	0.0341354
1.584	-0.038464		1.576	-0.0868191		1.576	0.0884965		1.576	0.0338767
1.585	-0.0382838		1.577	-0.0853839		1.577	0.0888925		1.577	0.0334041
1.586	-0.0382898		1.578	-0.0837748		1.578	0.0892716		1.578	0.0326654
1.587	-0.0384843		1.579	-0.0820837		1.579	0.0896311		1.579	0.0316616
1.588	-0.0388891		1.58	-0.0803887		1.58	0.0899673		1.58	0.0304414
1.589	-0.0395186		1.581	-0.0787762		1.581	0.0902759		1.581	0.0290658
1.59	-0.0403688		1.582	-0.0773266		1.582	0.0905478		1.582	0.0276129
1.591	-0.0414344		1.583	-0.0760949		1.583	0.0907769		1.583	0.0261609
1.592	-0.0427174		1.584	-0.0751125		1.584	0.0909671		1.584	0.0247885
1.593	-0.0442293		1.585	-0.0743738		1.585	0.0911216		1.585	0.0235497
1.594	-0.0459851		1.586	-0.073817		1.586	0.0912282		1.586	0.0224469
1.595	-0.0479645		1.587	-0.0733286		1.587	0.0912727		1.587	0.0214423
1.596	-0.0501056		1.588	-0.0727877		1.588	0.0912473		1.588	0.0204671
1.597	-0.0523485		1.589	-0.0721121		1.589	0.0911441		1.589	0.0194734
1.598	-0.054643		1.59	-0.0712827		1.59	0.0909647		1.59	0.018493
1.599	-0.0569475		1.591	-0.0703584		1.591	0.090725		1.591	0.0175875
1.6	-0.059239		1.592	-0.0694651		1.592	0.0904396		1.592	0.0167804
1.601	-0.0614913		1.593	-0.068752		1.593	0.0901155		1.593	0.0161155
1.602	-0.0636751		1.594	-0.0683411		1.594	0.0897587		1.594	0.0156584
1.603	-0.0657791		1.595	-0.068294		1.595	0.0893776		1.595	0.0153935
1.604	-0.0677979		1.596	-0.0686096		1.596	0.0889813		1.596	0.0152465
1.605	-0.0697089		1.597	-0.0692562		1.597	0.0885829		1.597	0.0151653
1.606	-0.0714537		1.598	-0.070202		1.598	0.0882034		1.598	0.0151394
1.607	-0.0729615		1.599	-0.0713969		1.599	0.0878585		1.599	0.0152172
1.608	-0.0742083		1.6	-0.0727234		1.6	0.0875445		1.6	0.0154547
1.609	-0.0751998		1.601	-0.0739945		1.601	0.0872541		1.601	0.0158234
1.61	-0.0759174		1.602	-0.0750083		1.602	0.0869924		1.602	0.0162598
1.611	-0.0763313		1.603	-0.075598		1.603	0.0867674		1.603	0.0167532
1.612	-0.0764324		1.604	-0.0756669		1.604	0.0865802		1.604	0.0173287
1.613	-0.0762528		1.605	-0.0752137		1.605	0.0864253		1.605	0.0180195
1.614	-0.0758528		1.606	-0.0743094		1.606	0.0862952		1.606	0.0188506
1.615	-0.0752653		1.607	-0.07305		1.607	0.0861768		1.607	0.0198137
1.616	-0.0744722		1.608	-0.0715499		1.608	0.0860532		1.608	0.0208678
1.617	-0.0734309		1.609	-0.0699505		1.609	0.0859159		1.609	0.0219509
1.618	-0.072107		1.61	-0.0684025		1.61	0.0857684		1.61	0.0230378
1.619	-0.0704843		1.611	-0.0670539		1.611	0.0856211		1.611	0.0241633
1.62	-0.0685624		1.612	-0.0660305		1.612	0.0854864		1.612	0.0253329
1.621	-0.0663696		1.613	-0.065395		1.613	0.0853672		1.613	0.0264669
1.622	-0.0639671		1.614	-0.065148		1.614	0.085255		1.614	0.0274476
1.623	-0.0614229		1.615	-0.0652642		1.615	0.0851447		1.615	0.0282068
1.624	-0.0588007		1.616	-0.0656888		1.616	0.0850352		1.616	0.0287406
1.625	-0.0561702		1.617	-0.0663059		1.617	0.0849265		1.617	0.0290817
1.626	-0.0535908		1.618	-0.0669504		1.618	0.0848266		1.618	0.0293024
1.627	-0.0511122		1.619	-0.0674496		1.619	0.0847491		1.619	0.0294671
1.628	-0.0488061		1.62	-0.0676602		1.62	0.0847062		1.62	0.0295713
1.629	-0.0467343		1.621	-0.0675036		1.621	0.0847134		1.621	0.0295538
1.63	-0.0448988		1.622	-0.0669713		1.622	0.0847835		1.622	0.0293359
1.631	-0.0432736		1.623	-0.0661042		1.623	0.0849216		1.623	0.0288747
1.632	-0.0418576		1.624	-0.0649772		1.624	0.0851305		1.624	0.0281614
1.633	-0.0406741		1.625	-0.0637034		1.625	0.0854087		1.625	0.0271991
1.634	-0.0397484		1.626	-0.0624356		1.626	0.0857503		1.626	0.0260714
1.635	-0.0390895		1.627	-0.0613308		1.627	0.0861464		1.627	0.0249063
1.636	-0.0386814		1.628	-0.0604836		1.628	0.0865885		1.628	0.0237373
1.637	-0.0385004		1.629	-0.0599056		1.629	0.0870695		1.629	0.0225492
1.638	-0.0385453		1.63	-0.0595776		1.63	0.0875794		1.63	0.0213896
1.639	-0.0388361		1.631	-0.0594536		1.631	0.0881088		1.631	0.0203532
1.64	-0.0393799		1.632	-0.0594246		1.632	0.0886534		1.632	0.0195089
1.641	-0.0401793		1.633	-0.0593687		1.633	0.0892051		1.633	0.0188316
1.642	-0.0412647		1.634	-0.0592121		1.634	0.0897495		1.634	0.0182218
1.643	-0.0426666		1.635	-0.0589242		1.635	0.090276		1.635	0.0176056
1.644	-0.044374		1.636	-0.0585083		1.636	0.0907823		1.636	0.0169774
1.645	-0.0463428		1.637	-0.0580046		1.637	0.0912598		1.637	0.0163726
1.646	-0.0485376		1.638	-0.0574965		1.638	0.0916929		1.638	0.0158283
1.647	-0.0509473		1.639	-0.0570889		1.639	0.0920755		1.639	0.0153298
1.648	-0.0535637		1.64	-0.0568727		1.64	0.0924018		1.64	0.0148119
1.649	-0.0563664		1.641	-0.0569288		1.641	0.0926564		1.641	0.0142492
1.65	-0.0593145		1.642	-0.0573224		1.642	0.0928317		1.642	0.0136563
1.651	-0.0623497		1.643	-0.0580694		1.643	0.0929345		1.643	0.0130348
1.652	-0.0654023		1.644	-0.0591311		1.644	0.0929638		1.644	0.0124187
1.653	-0.0683556		1.645	-0.0604277		1.645	0.0929075		1.645	0.0118635
1.654	-0.0710473		1.646	-0.0618403		1.646	0.0927682		1.646	0.0114128
1.655	-0.0733554		1.647	-0.0632019		1.647	0.092567		1.647	0.0111413
1.656	-0.0752252		1.648	-0.0643278		1.648	0.0923198		1.648	0.0110878
1.657	-0.0766184		1.649	-0.0650703		1.649	0.0920307		1.649	0.0111782
1.658	-0.0774949		1.65	-0.0653347		1.65	0.0917088		1.65	0.0113256
1.659	-0.0778319		1.651	-0.0650905		1.651	0.0913777		1.651	0.0115117
1.66	-0.0776474		1.652	-0.0643905		1.652	0.0910621		1.652	0.0117686
1.661	-0.0769924		1.653	-0.0633709		1.653	0.0907722		1.653	0.0121573
1.662	-0.0759179		1.654	-0.0622112		1.654	0.090513		1.654	0.0126888
1.663	-0.0744677		1.655	-0.0610738		1.655	0.0902952		1.655	0.0132877
1.664	-0.0727015		1.656	-0.0600946		1.656	0.090127		1.656	0.0138777
1.665	-0.0707001		1.657	-0.0594001		1.657	0.0900108		1.657	0.0144208
1.666	-0.0685515		1.658	-0.0590842		1.658	0.089952		1.658	0.0149217
1.667	-0.0663409		1.659	-0.0591768		1.659	0.0899575		1.659	0.0154399
1.668	-0.0641218		1.66	-0.059647		1.66	0.0900298		1.66	0.0160683
1.669	-0.0619148		1.661	-0.0604293		1.661	0.0901651		1.661	0.0168805
1.67	-0.0597497		1.662	-0.0614266		1.662	0.0903546		1.662	0.0178498
1.671	-0.0576675		1.663	-0.0624867		1.663	0.0905882		1.663	0.0188723
1.672	-0.0556786		1.664	-0.0634104		1.664	0.0908561		1.664	0.0198693
1.673	-0.0537475		1.665	-0.0640182		1.665	0.0911459		1.665	0.0208067
1.674	-0.0518354		1.666	-0.0642087		1.666	0.0914408		1.666	0.0216621
1.675	-0.0499492		1.667	-0.0639604		1.667	0.0917281		1.667	0.0224442
1.676	-0.0481243		1.668	-0.063309		1.668	0.0920003		1.668	0.0232067
1.677	-0.0463879		1.669	-0.0623284		1.669	0.0922468		1.669	0.023941
1.678	-0.0447708		1.67	-0.0611237		1.67	0.0924607		1.67	0.0244981
1.679	-0.0433078		1.671	-0.0598175		1.671	0.092646		1.671	0.024723
1.68	-0.0420108		1.672	-0.0585201		1.672	0.0928043		1.672	0.0246208
1.681	-0.0408607		1.673	-0.0573069		1.673	0.0929286		1.673	0.0243126
1.682	-0.0398251		1.674	-0.0562201		1.674	0.0930149		1.674	0.0238775
1.683	-0.0388789		1.675	-0.0552757		1.675	0.0930693		1.675	0.0233036
1.684	-0.0380278		1.676	-0.0544671		1.676	0.0931071		1.676	0.0225574
1.685	-0.0373176		1.677	-0.0537616		1.677	0.0931429		1.677	0.0216432
1.686	-0.0368205		1.678	-0.0531027		1.678	0.0931811		1.678	0.0206052
1.687	-0.0366131		1.679	-0.0524387		1.679	0.0932158		1.679	0.0194986
1.688	-0.0367543		1.68	-0.051737		1.68	0.0932371		1.68	0.0183838
1.689	-0.0372631		1.681	-0.0509958		1.681	0.0932435		1.681	0.0173366
1.69	-0.0381163		1.682	-0.0502762		1.682	0.0932342		1.682	0.0164052
1.691	-0.0392624		1.683	-0.0496819		1.683	0.0931987		1.683	0.0156062
1.692	-0.0406306		1.684	-0.049288		1.684	0.0931286		1.684	0.0149808
1.693	-0.0421648		1.685	-0.0491283		1.685	0.0930241		1.685	0.0145566
1.694	-0.0438414		1.686	-0.0492472		1.686	0.0928865		1.686	0.0142609
1.695	-0.0456189		1.687	-0.049716		1.687	0.0927153		1.687	0.0139726
1.696	-0.0474228		1.688	-0.0505745		1.688	0.0925075		1.688	0.0136494
1.697	-0.0492021		1.689	-0.0517859		1.689	0.0922681		1.689	0.013283
1.698	-0.0509642		1.69	-0.0532669		1.69	0.0920069		1.69	0.012815
1.699	-0.0527362		1.691	-0.0549219		1.691	0.0917235		1.691	0.0122055
1.7	-0.0545042		1.692	-0.0566209		1.692	0.0914165		1.692	0.0115053
1.701	-0.0562157		1.693	-0.0581878		1.693	0.091093		1.693	0.0108383
1.702	-0.0578207		1.694	-0.0594258		1.694	0.0907591		1.694	0.0103072
1.703	-0.0592755		1.695	-0.0601554		1.695	0.0904153		1.695	0.00992732
1.704	-0.0605308		1.696	-0.060281		1.696	0.0900598		1.696	0.00966027
1.705	-0.0615642		1.697	-0.0598441		1.697	0.0896974		1.697	0.00946552
1.706	-0.0623985		1.698	-0.0589752		1.698	0.089342		1.698	0.00933282
1.707	-0.0630412		1.699	-0.0578018		1.699	0.0890056		1.699	0.00929577
1.708	-0.0634632		1.7	-0.0564406		1.7	0.0886906		1.7	0.00940087
1.709	-0.0636419		1.701	-0.0550323		1.701	0.0884039		1.701	0.00965312
1.71	-0.0635737		1.702	-0.0537233		1.702	0.0881624		1.702	0.0100146
1.711	-0.063257		1.703	-0.0526146		1.703	0.0879723		1.703	0.0104477
1.712	-0.0626871		1.704	-0.0517599		1.704	0.0878252		1.704	0.0109146
1.713	-0.06187		1.705	-0.0511926		1.705	0.0877152		1.705	0.01135
1.714	-0.0608187		1.706	-0.0509117		1.706	0.0876419		1.706	0.0116841
1.715	-0.0595369		1.707	-0.0508532		1.707	0.0876066		1.707	0.0119039
1.716	-0.0580458		1.708	-0.050903		1.708	0.0876142		1.708	0.0120719
1.717	-0.0563789		1.709	-0.0509104		1.709	0.0876631		1.709	0.0122726
1.718	-0.0545529		1.71	-0.0507034		1.71	0.0877437		1.71	0.0125546
1.719	-0.0526		1.711	-0.0501621		1.711	0.0878467		1.711	0.0129283
1.72	-0.0505791		1.712	-0.0492688		1.712	0.0879653		1.712	0.0134132
1.721	-0.0485314		1.713	-0.0480713		1.713	0.0880939		1.713	0.0140452
1.722	-0.0464688		1.714	-0.0466365		1.714	0.0882267		1.714	0.0148235
1.723	-0.0444039		1.715	-0.0450533		1.715	0.0883586		1.715	0.0156936
1.724	-0.0423827		1.716	-0.043449		1.716	0.0884911		1.716	0.0165678
1.725	-0.0404776		1.717	-0.0419608		1.717	0.0886281		1.717	0.0173622
1.726	-0.0387418		1.718	-0.0406786		1.718	0.0887657		1.718	0.0180042
1.727	-0.0372044		1.719	-0.0396406		1.719	0.0888984		1.719	0.018372
1.728	-0.0359106		1.72	-0.0388689		1.72	0.0890276		1.72	0.0183242
1.729	-0.0348991		1.721	-0.0383668		1.721	0.0891518		1.721	0.0178481
1.73	-0.0341613		1.722	-0.0381243		1.722	0.0892615		1.722	0.0170686
1.731	-0.0336709		1.723	-0.0381354		1.723	0.0893522		1.723	0.0160963
1.732	-0.0334238		1.724	-0.0383587		1.724	0.0894309		1.724	0.0149388
1.733	-0.0334333		1.725	-0.0386801		1.725	0.0895032		1.725	0.0135671
1.734	-0.0336841		1.726	-0.0389645		1.726	0.0895667		1.726	0.0120339
1.735	-0.0341269		1.727	-0.0391239		1.727	0.0896149		1.727	0.0104761
1.736	-0.034749		1.728	-0.0391222		1.728	0.0896421		1.728	0.00902637
1.737	-0.0355863		1.729	-0.0389676		1.729	0.0896427		1.729	0.00774667
1.738	-0.0366554		1.73	-0.0387263		1.73	0.0896091		1.73	0.00661577
1.739	-0.0379459		1.731	-0.0384905		1.731	0.0895315		1.731	0.00558785
1.74	-0.0394703		1.732	-0.0383329		1.732	0.089403		1.732	0.00465967
1.741	-0.0412563		1.733	-0.0383109		1.733	0.0892241		1.733	0.00384121
1.742	-0.0433009		1.734	-0.0384861		1.734	0.0889969		1.734	0.00309027
1.743	-0.0455707		1.735	-0.0389073		1.735	0.0887192		1.735	0.00235028
1.744	-0.0480343		1.736	-0.0395719		1.736	0.0883853		1.736	0.00160678
1.745	-0.0506802		1.737	-0.0404315		1.737	0.0879929		1.737	0.00082365
1.746	-0.0534888		1.738	-0.0414263		1.738	0.0875538		1.738	-8.3455e-05
1.747	-0.0563924		1.739	-0.0424656		1.739	0.0870915		1.739	-0.00115122
1.748	-0.0593015		1.74	-0.043397		1.74	0.0866208		1.74	-0.00233796
1.749	-0.0621633		1.741	-0.0440321		1.741	0.0861466		1.741	-0.00357243
1.75	-0.0649522		1.742	-0.0442159		1.742	0.0856774		1.742	-0.00478718
1.751	-0.067624		1.743	-0.0438966		1.743	0.0852185		1.743	-0.00592453
1.752	-0.0701222		1.744	-0.0431377		1.744	0.0847651		1.744	-0.00691384
1.753	-0.072387		1.745	-0.0420784		1.745	0.0843136		1.745	-0.00769238
1.754	-0.0743343		1.746	-0.0408907		1.746	0.0838619		1.746	-0.00822238
1.755	-0.0758902		1.747	-0.0397212		1.747	0.083406		1.747	-0.00844032
1.756	-0.0770442		1.748	-0.038662		1.748	0.0829475		1.748	-0.0082811
1.757	-0.0778275		1.749	-0.0377873		1.749	0.0824988		1.749	-0.00778678
1.758	-0.0782522		1.75	-0.0371728		1.75	0.0820779		1.75	-0.00709544
1.759	-0.0782714		1.751	-0.0368575		1.751	0.0816993		1.751	-0.00629915
1.76	-0.0778053		1.752	-0.036819		1.752	0.0813679		1.752	-0.00538163
1.761	-0.0768167		1.753	-0.0369794		1.753	0.0810831		1.753	-0.00425184
1.762	-0.0753258		1.754	-0.0372074		1.754	0.0808462		1.754	-0.00286445
1.763	-0.0733706		1.755	-0.0373247		1.755	0.080661		1.755	-0.00133791
1.764	-0.0709938		1.756	-0.0371436		1.756	0.0805327		1.756	0.000155195
1.765	-0.0682385		1.757	-0.0365363		1.757	0.0804679		1.757	0.0015317
1.766	-0.0651641		1.758	-0.0354845		1.758	0.0804713		1.758	0.00279209
1.767	-0.0618694		1.759	-0.0340645		1.759	0.0805411		1.759	0.00396737
1.768	-0.0584594		1.76	-0.0324072		1.76	0.0806726		1.76	0.00504901
1.769	-0.0549898		1.761	-0.030666		1.761	0.0808646		1.761	0.00595541
1.77	-0.0514741		1.762	-0.0289989		1.762	0.0811153		1.762	0.00657192
1.771	-0.0479344		1.763	-0.0275594		1.763	0.0814126		1.763	0.00682532
1.772	-0.0444093		1.764	-0.026488		1.764	0.0817361		1.764	0.00674202
1.773	-0.0409435		1.765	-0.0258984		1.765	0.0820709		1.765	0.00645892
1.774	-0.0375908		1.766	-0.0258411		1.766	0.0824195		1.766	0.00615816
1.775	-0.0343977		1.767	-0.0262757		1.767	0.0827926		1.767	0.00594599
1.776	-0.0313863		1.768	-0.027095		1.768	0.0831843		1.768	0.00583313
1.777	-0.0285596		1.769	-0.0281773		1.769	0.0835695		1.769	0.00580346
1.778	-0.0259207		1.77	-0.029387		1.77	0.0839268		1.77	0.00582493
1.779	-0.0235015		1.771	-0.03056		1.771	0.0842472		1.771	0.00583617
1.78	-0.0213708		1.772	-0.0315403		1.772	0.0845299		1.772	0.00576135
1.781	-0.0196031		1.773	-0.03222		1.773	0.0847777		1.773	0.00553837
1.782	-0.0182563		1.774	-0.0325669		1.774	0.0849882		1.774	0.00512979
1.783	-0.0173784		1.775	-0.0326264		1.775	0.0851576		1.775	0.00451878
1.784	-0.0170121		1.776	-0.0324954		1.776	0.0852915		1.776	0.00372678
1.785	-0.0171859		1.777	-0.0322823		1.777	0.0854007		1.777	0.00282272
1.786	-0.0179091		1.778	-0.032067		1.778	0.0854896		1.778	0.00188672
1.787	-0.0191851		1.779	-0.0319279		1.779	0.0855528		1.779	0.000959735
1.788	-0.0210218		1.78	-0.031977		1.78	0.0855795		1.78	3.5815e-05
1.789	-0.0233994		1.781	-0.0323065		1.781	0.0855528		1.781	-0.000917035
1.79	-0.0262634		1.782	-0.0329284		1.782	0.0854524		1.782	-0.00197294
1.791	-0.0295818		1.783	-0.0337729		1.783	0.085265		1.783	-0.00325481
1.792	-0.0333697		1.784	-0.0347143		1.784	0.0849919		1.784	-0.00482328
1.793	-0.0376432		1.785	-0.0356077		1.785	0.0846423		1.785	-0.00659311
1.794	-0.0423853		1.786	-0.0363334		1.786	0.0842208		1.786	-0.00848588
1.795	-0.0475481		1.787	-0.0368239		1.787	0.0837274		1.787	-0.010549
1.796	-0.0530625		1.788	-0.0370799		1.788	0.0831676		1.788	-0.0128327
1.797	-0.0588444		1.789	-0.0371786		1.789	0.0825501		1.789	-0.0152851
1.798	-0.0647898		1.79	-0.0372393		1.79	0.0818716		1.79	-0.017745
1.799	-0.070784		1.791	-0.0373777		1.791	0.0811265		1.791	-0.0200062
1.8	-0.0767263		1.792	-0.0376945		1.792	0.08033		1.792	-0.0219147
1.801	-0.0825005		1.793	-0.0382702		1.793	0.0795092		1.793	-0.0233567
1.802	-0.0879406		1.794	-0.0391467		1.794	0.0786825		1.794	-0.0242311
1.803	-0.0928895		1.795	-0.040303		1.795	0.0778637		1.795	-0.0245125
1.804	-0.0972571		1.796	-0.0416341		1.796	0.0770711		1.796	-0.0242647
1.805	-0.100999		1.797	-0.0429676		1.797	0.0763271		1.797	-0.0235781
1.806	-0.104091		1.798	-0.0440969		1.798	0.0756527		1.798	-0.0225356
1.807	-0.106532		1.799	-0.0447989		1.799	0.0750624		1.799	-0.0212236
1.808	-0.108345		1.8	-0.0448973		1.8	0.0745618		1.8	-0.0197606
1.809	-0.109552		1.801	-0.0443404		1.801	0.0741525		1.801	-0.0182637
1.81	-0.110142		1.802	-0.0432048		1.802	0.0738363		1.802	-0.0167701
1.811	-0.110064		1.803	-0.0416392		1.803	0.0736175		1.803	-0.0152247
1.812	-0.109273		1.804	-0.0398195		1.804	0.0734972		1.804	-0.0135468
1.813	-0.107745		1.805	-0.0379389		1.805	0.0734659		1.805	-0.0116968
1.814	-0.105484		1.806	-0.036182		1.806	0.0735164		1.806	-0.00971228
1.815	-0.102553		1.807	-0.0346919		1.807	0.0736499		1.807	-0.00768844
1.816	-0.0990508		1.808	-0.0335765		1.808	0.0738593		1.808	-0.00569124
1.817	-0.0950483		1.809	-0.0328971		1.809	0.0741277		1.809	-0.00373021
1.818	-0.0905918		1.81	-0.0326076		1.81	0.0744451		1.81	-0.00182696
1.819	-0.0857406		1.811	-0.0325585		1.811	0.0748118		1.811	-4.0455e-05
1.82	-0.0805827		1.812	-0.0325554		1.812	0.0752319		1.812	0.00157782
1.821	-0.0752454		1.813	-0.0323955		1.813	0.0757067		1.813	0.00299854
1.822	-0.0698467		1.814	-0.0319159		1.814	0.0762311		1.814	0.00421825
1.823	-0.0644427		1.815	-0.0310327		1.815	0.076792		1.815	0.00530964
1.824	-0.0590612		1.816	-0.029715		1.816	0.0773733		1.816	0.00636057
1.825	-0.053751		1.817	-0.0279702		1.817	0.0779641		1.817	0.00732882
1.826	-0.0485909		1.818	-0.0258816		1.818	0.0785595		1.818	0.00807527
1.827	-0.043674		1.819	-0.0236069		1.819	0.0791541		1.819	0.00849787
1.828	-0.0390957		1.82	-0.0213238		1.82	0.0797426		1.82	0.00857997
1.829	-0.0349672		1.821	-0.0191879		1.821	0.0803181		1.821	0.00836587
1.83	-0.0313963		1.822	-0.0173139		1.822	0.0808664		1.822	0.00789817
1.831	-0.0284259		1.823	-0.0157743		1.823	0.0813711		1.823	0.00720582
1.832	-0.0260359		1.824	-0.0146052		1.824	0.0818188		1.824	0.00634872
1.833	-0.0242112		1.825	-0.0138017		1.825	0.0821997		1.825	0.00538971
1.834	-0.0229634		1.826	-0.0133185		1.826	0.0825		1.826	0.0043779
1.835	-0.0223041		1.827	-0.0130958		1.827	0.0827088		1.827	0.00337186
1.836	-0.0222227		1.828	-0.0130864		1.828	0.0828327		1.828	0.00240683
1.837	-0.022686		1.829	-0.0132529		1.829	0.0828857		1.829	0.00147592
1.838	-0.0236672		1.83	-0.0135769		1.83	0.0828815		1.83	0.00055002
1.839	-0.0251525		1.831	-0.0140874		1.831	0.0828381		1.831	-0.000391445
1.84	-0.0271154		1.832	-0.014832		1.832	0.0827685		1.832	-0.0013484
1.841	-0.0295059		1.833	-0.0158359		1.833	0.082672		1.833	-0.00230762
1.842	-0.0322516		1.834	-0.0171119		1.834	0.0825399		1.834	-0.00325429
1.843	-0.0352742		1.835	-0.0186492		1.835	0.0823614		1.835	-0.00420828
1.844	-0.0385084		1.836	-0.0203965		1.836	0.082128		1.836	-0.0052272
1.845	-0.0418864		1.837	-0.0222952		1.837	0.0818349		1.837	-0.00634627
1.846	-0.04533		1.838	-0.0242967		1.838	0.0814838		1.838	-0.00753554
1.847	-0.0487773		1.839	-0.0263381		1.839	0.08108		1.839	-0.00872727
1.848	-0.0521902		1.84	-0.02832		1.84	0.0806269		1.84	-0.00989809
1.849	-0.055537		1.841	-0.0300836		1.841	0.0801318		1.841	-0.011098
1.85	-0.058798		1.842	-0.0314289		1.842	0.0796106		1.842	-0.0123311
1.851	-0.0619595		1.843	-0.0321965		1.843	0.0790836		1.843	-0.0134871
1.852	-0.0649806		1.844	-0.032317		1.844	0.0785692		1.844	-0.0144798
1.853	-0.0677921		1.845	-0.0318171		1.845	0.0780837		1.845	-0.0153271
1.854	-0.0703204		1.846	-0.0308356		1.846	0.0776406		1.846	-0.0160272
1.855	-0.0725027		1.847	-0.0296001		1.847	0.0772444		1.847	-0.0164942
1.856	-0.0743057		1.848	-0.0283628		1.848	0.0768912		1.848	-0.0166514
1.857	-0.0757252		1.849	-0.0273703		1.849	0.0765752		1.849	-0.0164646
1.858	-0.0767416		1.85	-0.0268273		1.85	0.0762945		1.85	-0.0159164
1.859	-0.0772971		1.851	-0.0268329		1.851	0.0760514		1.851	-0.0150389
1.86	-0.0773312		1.852	-0.0273546		1.852	0.0758475		1.852	-0.0139099
1.861	-0.0768229		1.853	-0.0282411		1.853	0.0756851		1.853	-0.0126053
1.862	-0.0757822		1.854	-0.0292605		1.854	0.0755701		1.854	-0.0111768
1.863	-0.074217		1.855	-0.0301391		1.855	0.0755096		1.855	-0.00966475
1.864	-0.0721354		1.856	-0.0305802		1.856	0.0755141		1.856	-0.00813524
1.865	-0.0695643		1.857	-0.0303061		1.857	0.0755951		1.857	-0.00669255
1.866	-0.0665524		1.858	-0.0291631		1.858	0.0757597		1.858	-0.00543055
1.867	-0.0631642		1.859	-0.0271761		1.859	0.0760079		1.859	-0.00438561
1.868	-0.0594723		1.86	-0.0244742		1.86	0.0763298		1.86	-0.00354252
1.869	-0.0555787		1.861	-0.0212282		1.861	0.0767191		1.861	-0.00283569
1.87	-0.0516247		1.862	-0.0176485		1.862	0.0771857		1.862	-0.00216545
1.871	-0.0477248		1.863	-0.0139565		1.863	0.077738		1.863	-0.00145245
1.872	-0.0439155		1.864	-0.0103347		1.864	0.0783618		1.864	-0.000660155
1.873	-0.0401999		1.865	-0.00692595		1.865	0.0790271		1.865	0.000205515
1.874	-0.0365848		1.866	-0.00385964		1.866	0.0797085		1.866	0.00108005
1.875	-0.0330867		1.867	-0.00124085		1.867	0.0803879		1.867	0.0018929
1.876	-0.029747		1.868	0.000852893		1.868	0.081048		1.868	0.00265137
1.877	-0.0266125		1.869	0.00238811		1.869	0.0816735		1.869	0.00335095
1.878	-0.0237126		1.87	0.00341109		1.87	0.0822497		1.87	0.00389787
1.879	-0.0210775		1.871	0.00400346		1.871	0.0827578		1.871	0.00421874
1.88	-0.0187703		1.872	0.00421543		1.872	0.0831767		1.872	0.00430677
1.881	-0.0168779		1.873	0.00406513		1.873	0.0834924		1.873	0.00418956
1.882	-0.015447		1.874	0.00356398		1.874	0.0837084		1.874	0.00389924
1.883	-0.0144498		1.875	0.00273173		1.875	0.0838405		1.875	0.00345712
1.884	-0.0138329		1.876	0.00157405		1.876	0.0838997		1.876	0.00290711
1.885	-0.0135911		1.877	5.81448e-05		1.877	0.0838871		1.877	0.00225737
1.886	-0.0137659		1.878	-0.00184361		1.878	0.0837966		1.878	0.00144295
1.887	-0.0143836		1.879	-0.00410263		1.879	0.0836136		1.879	0.00043155
1.888	-0.0154302		1.88	-0.00664781		1.88	0.0833263		1.88	-0.00074399
1.889	-0.0168749		1.881	-0.0093929		1.881	0.0829415		1.881	-0.00201497
1.89	-0.0186867		1.882	-0.0122183		1.882	0.082477		1.882	-0.00330251
1.891	-0.0208518		1.883	-0.0149664		1.883	0.0819514		1.883	-0.00459903
1.892	-0.0233749		1.884	-0.0174977		1.884	0.0813873		1.884	-0.00597445
1.893	-0.0262375		1.885	-0.0196905		1.885	0.0808013		1.885	-0.00748068
1.894	-0.0293865		1.886	-0.0213827		1.886	0.0801942		1.886	-0.00910388
1.895	-0.0327373		1.887	-0.0224241		1.887	0.0795632		1.887	-0.0107796
1.896	-0.036176		1.888	-0.0227905		1.888	0.0789165		1.888	-0.0124054
1.897	-0.0396057		1.889	-0.0225807		1.889	0.0782661		1.889	-0.0138701
1.898	-0.0429645		1.89	-0.0219418		1.89	0.0776203		1.89	-0.0151224
1.899	-0.0462048		1.891	-0.0210404		1.891	0.0769903		1.891	-0.0161735
1.9	-0.0492729		1.892	-0.020073		1.892	0.0763894		1.892	-0.0170119
1.901	-0.0520861		1.893	-0.0192683		1.893	0.0758273		1.893	-0.0175592
1.902	-0.0545535		1.894	-0.0188146		1.894	0.0753082		1.894	-0.0177451
1.903	-0.056629		1.895	-0.0187635		1.895	0.0748336		1.895	-0.0176153
1.904	-0.0583308		1.896	-0.0190635		1.896	0.0744089		1.896	-0.017295
1.905	-0.0596785		1.897	-0.0196491		1.897	0.0740452		1.897	-0.0168544
1.906	-0.0606364		1.898	-0.0204149		1.898	0.0737427		1.898	-0.0162651
1.907	-0.0611753		1.899	-0.0211558		1.899	0.0734863		1.899	-0.0154753
1.908	-0.0613163		1.9	-0.0215965		1.9	0.0732646		1.9	-0.0144938
1.909	-0.061066		1.901	-0.0214889		1.901	0.0730736		1.901	-0.0133847
1.91	-0.0603832		1.902	-0.0206934		1.902	0.0729111		1.902	-0.0122216
1.911	-0.0592318		1.903	-0.0191932		1.903	0.0727822		1.903	-0.0110684
1.912	-0.0576238		1.904	-0.0170722		1.904	0.0726978		1.904	-0.00999031
1.913	-0.0555966		1.905	-0.0144891		1.905	0.0726644		1.905	-0.009033
1.914	-0.0531968		1.906	-0.0116343		1.906	0.0726851		1.906	-0.00818245
1.915	-0.0504834		1.907	-0.00869532		1.907	0.0727675		1.907	-0.00741808
1.916	-0.0475015		1.908	-0.00584333		1.908	0.0729197		1.908	-0.00676641
1.917	-0.0442698		1.909	-0.00322189		1.909	0.0731405		1.909	-0.00623225
1.918	-0.0408159		1.91	-0.000952466		1.91	0.0734199		1.91	-0.00575377
1.919	-0.0371955		1.911	0.00086032		1.911	0.0737445		1.911	-0.00528504
1.92	-0.0334838		1.912	0.00213718		1.912	0.0740988		1.912	-0.00486288
1.921	-0.0297663		1.913	0.00285042		1.913	0.0744678		1.913	-0.00453254
1.922	-0.0261404		1.914	0.00305247		1.914	0.0748449		1.914	-0.00426168
1.923	-0.0226997		1.915	0.0028471		1.915	0.0752314		1.915	-0.00398706
1.924	-0.0195012		1.916	0.00234739		1.916	0.0756252		1.916	-0.0036985
1.925	-0.0165746		1.917	0.00168676		1.917	0.0760209		1.917	-0.0034121
1.926	-0.0139442		1.918	0.00101223		1.918	0.0764122		1.918	-0.00313352
1.927	-0.0116175		1.919	0.000429163		1.919	0.0767918		1.919	-0.00291367
1.928	-0.00959014		1.92	-2.59922e-05		1.92	0.077152		1.92	-0.00282663
1.929	-0.00787231		1.921	-0.000368546		1.921	0.0774854		1.921	-0.00290521
1.93	-0.00650861		1.922	-0.000636594		1.922	0.0777892		1.922	-0.00318884
1.931	-0.00556272		1.923	-0.000874105		1.923	0.0780645		1.923	-0.00372524
1.932	-0.00506004		1.924	-0.00113567		1.924	0.0783018		1.924	-0.00448404
1.933	-0.00497528		1.925	-0.00149065		1.925	0.0784788		1.925	-0.00540336
1.934	-0.00529121		1.926	-0.00201942		1.926	0.0785779		1.926	-0.00649781
1.935	-0.00601261		1.927	-0.00277683		1.927	0.0785947		1.927	-0.00775939
1.936	-0.0071337		1.928	-0.00373163		1.928	0.0785333		1.928	-0.00906192
1.937	-0.00863508		1.929	-0.00477824		1.929	0.0784023		1.929	-0.0102859
1.938	-0.010478		1.93	-0.00580114		1.93	0.0782076		1.93	-0.0113796
1.939	-0.0126074		1.931	-0.00669451		1.931	0.0779542		1.931	-0.0123426
1.94	-0.014983		1.932	-0.00737293		1.932	0.0776488		1.932	-0.0132476
1.941	-0.017577		1.933	-0.00780222		1.933	0.0772953		1.933	-0.0141719
1.942	-0.0203497		1.934	-0.00800357		1.934	0.0768957		1.934	-0.015175
1.943	-0.0232642		1.935	-0.00805134		1.935	0.0764572		1.935	-0.0163395
1.944	-0.0263121		1.936	-0.00806104		1.936	0.0759926		1.936	-0.0176848
1.945	-0.0295013		1.937	-0.00814157		1.937	0.0755158		1.937	-0.0191359
1.946	-0.0328148		1.938	-0.00837651		1.938	0.075036		1.938	-0.0206329
1.947	-0.0362014		1.939	-0.00884254		1.939	0.0745528		1.939	-0.0221656
1.948	-0.0396045		1.94	-0.00959619		1.94	0.0740573		1.94	-0.0237124
1.949	-0.0429602		1.941	-0.0106469		1.941	0.0735438		1.941	-0.0251834
1.95	-0.0461888		1.942	-0.0119561		1.942	0.0730122		1.942	-0.0264661
1.951	-0.049215		1.943	-0.0134249		1.943	0.0724652		1.943	-0.0275223
1.952	-0.051964		1.944	-0.0148655		1.944	0.0719123		1.944	-0.028369
1.953	-0.0543595		1.945	-0.0160237		1.945	0.0713712		1.945	-0.0290018
1.954	-0.0563374		1.946	-0.0166398		1.946	0.0708571		1.946	-0.0293494
1.955	-0.0578357		1.947	-0.0165213		1.947	0.0703767		1.947	-0.0293045
1.956	-0.0588172		1.948	-0.0156165		1.948	0.0699373		1.948	-0.0288325
1.957	-0.0593069		1.949	-0.0140267		1.949	0.0695536		1.949	-0.0279856
1.958	-0.0593494		1.95	-0.0119393		1.95	0.069239		1.95	-0.0268246
1.959	-0.0589498		1.951	-0.00955641		1.951	0.0689978		1.951	-0.0253847
1.96	-0.0580876		1.952	-0.00708476		1.952	0.0688314		1.952	-0.0236744
1.961	-0.0567496		1.953	-0.00475807		1.953	0.0687426		1.953	-0.0217244
1.962	-0.0549476		1.954	-0.0028091		1.954	0.0687334		1.954	-0.0196305
1.963	-0.0527215		1.955	-0.00139948		1.955	0.068806		1.955	-0.0174784
1.964	-0.0500888		1.956	-0.000580974		1.956	0.0689607		1.956	-0.0153103
1.965	-0.0470463		1.957	-0.000296151		1.957	0.0691932		1.957	-0.0131958
1.966	-0.0436563		1.958	-0.000404965		1.958	0.0694925		1.958	-0.0112192
1.967	-0.0400365		1.959	-0.000727121		1.959	0.0698446		1.959	-0.00942104
1.968	-0.0362758		1.96	-0.00104588		1.96	0.070242		1.96	-0.00781676
1.969	-0.0324258		1.961	-0.00112108		1.961	0.0706786		1.961	-0.0064292
1.97	-0.0285316		1.962	-0.000769318		1.962	0.071145		1.962	-0.00526427
1.971	-0.0246545		1.963	8.23751e-05		1.963	0.0716365		1.963	-0.00428887
1.972	-0.0208727		1.964	0.00140026		1.964	0.0721547		1.964	-0.00344925
1.973	-0.0172356		1.965	0.00306875		1.965	0.072696		1.965	-0.00271424
1.974	-0.0137708		1.966	0.00493939		1.966	0.073245		1.966	-0.00215517
1.975	-0.0105326		1.967	0.00687251		1.967	0.0737813		1.967	-0.00190999
1.976	-0.00759133		1.968	0.00875269		1.968	0.0742862		1.968	-0.00198778
1.977	-0.00499211		1.969	0.0104781		1.969	0.0747461		1.969	-0.0022502
1.978	-0.00275494		1.97	0.0119584		1.97	0.0751568		1.97	-0.00260188
1.979	-0.00090612		1.971	0.0131542		1.971	0.0755199		1.971	-0.00305684
1.98	0.000526488		1.972	0.0140851		1.972	0.0758341		1.972	-0.00367374
1.981	0.001533		1.973	0.0147843		1.973	0.0760917		1.973	-0.00451046
1.982	0.00211168		1.974	0.0152524		1.974	0.0762871		1.974	-0.00558016
1.983	0.00226172		1.975	0.0154707		1.975	0.0764301		1.975	-0.00681883
1.984	0.00198541		1.976	0.0154583		1.976	0.0765376		1.976	-0.00811325
1.985	0.0012805		1.977	0.0152632		1.977	0.0766193		1.977	-0.00932872
1.986	0.000135247		1.978	0.0149141		1.978	0.0766806		1.978	-0.0103373
1.987	-0.00144232		1.979	0.0144062		1.979	0.0767276		1.979	-0.011103
1.988	-0.00339208		1.98	0.0137126		1.98	0.0767603		1.98	-0.0116993
1.989	-0.00564453		1.981	0.0128051		1.981	0.0767674		1.981	-0.0122149
1.99	-0.00818022		1.982	0.0116805		1.982	0.0767372		1.982	-0.0127144
1.991	-0.0109922		1.983	0.0103455		1.983	0.0766705		1.983	-0.0132707
1.992	-0.0140231		1.984	0.00877045		1.984	0.0765695		1.984	-0.0139519
1.993	-0.0171899		1.985	0.00692001		1.985	0.0764297		1.985	-0.0147783
1.994	-0.0204424		1.986	0.00483412		1.986	0.076246		1.986	-0.0157127
1.995	-0.0237393		1.987	0.00264264		1.987	0.0760158		1.987	-0.0166751
1.996	-0.0269939		1.988	0.000523193		1.988	0.0757424		1.988	-0.0175838
1.997	-0.0301165		1.989	-0.00133494		1.989	0.0754383		1.989	-0.0183816
1.998	-0.0330616		1.99	-0.0027529		1.99	0.0751177		1.99	-0.0190142
1.999	-0.0357764		1.991	-0.00359019		1.991	0.0747854		1.991	-0.0194641
2	-0.0381699		1.992	-0.003775		1.992	0.0744356		1.992	-0.019784
2.001	-0.0401772		1.993	-0.00331612		1.993	0.0740629		1.993	-0.0200084
[truncated: 1,006 more rows]
