# Supplementary material for: A two-lane mechanism for selective biological ammonium transport
Source: eLife. 2020 Jul 14;9:e57183. doi: 10.7554/eLife.57183 (PMC7447429; doi:10.7554/eLife.57183)
Supplement: Figure 2—source data 1. [file elife-57183-fig2-data1.xlsx]

## Sheet: Heavy Water Traces
2019-09-11-0017			2019-09-10-0038			2019-09-10-0013
AmtB LPR 10 200 mM NH4+ D2O sensors rinsed with H2O solutions N1M2			AmtB LPR 10 200 mM NH4+ H2O sensors H2O solutions N2M3			AmtB LPR 10 200 mM NH4+ D2O sensors D2O solutions N1M2
waveform	[0]		waveform	[0]		waveform	[0]
t0	43719.5		t0	43718.7		t0	43718.6
delta t	0.003		delta t	0.001		delta t	0.001
time	Y[0]		time	Y[0]		time	Y[0]
-0.003	-0.000107953		0	-0.000197484		0	-0.0776785
-0.002	-0.000691373		0.001	-0.00128149		0.001	-0.0779429
-0.001	-0.00223177		0.002	-0.00418997		0.002	-0.0786807
-1.13624e-16	-0.00506403		0.003	-0.00958526		0.003	-0.080101
0.001	-0.00934258		0.004	-0.0177259		0.004	-0.0823311
0.002	-0.0150441		0.005	-0.0285622		0.005	-0.0854248
0.003	-0.0219797		0.006	-0.0418269		0.006	-0.0893498
0.004	-0.0299384		0.007	-0.0571123		0.007	-0.094005
0.005	-0.0387428		0.008	-0.0739144		0.008	-0.0992567
0.006	-0.0481337		0.009	-0.0916874		0.009	-0.104973
0.007	-0.0577716		0.01	-0.1099		0.01	-0.111029
0.008	-0.0673799		0.011	-0.128051		0.011	-0.117261
0.009	-0.0767656		0.012	-0.14568		0.012	-0.123494
0.01	-0.0857532		0.013	-0.162403		0.013	-0.129595
0.011	-0.0941895		0.014	-0.177943		0.014	-0.135436
0.012	-0.101994		0.015	-0.19211		0.015	-0.140856
0.013	-0.109165		0.016	-0.204761		0.016	-0.145721
0.014	-0.115699		0.017	-0.215766		0.017	-0.149972
0.015	-0.121531		0.018	-0.225013		0.018	-0.153584
0.016	-0.126599		0.019	-0.232425		0.019	-0.156534
0.017	-0.130887		0.02	-0.238003		0.02	-0.158826
0.018	-0.134381		0.021	-0.241852		0.021	-0.160496
0.019	-0.13703		0.022	-0.244169		0.022	-0.161596
0.02	-0.138779		0.023	-0.245183		0.023	-0.162177
0.021	-0.139612		0.024	-0.245083		0.024	-0.162293
0.022	-0.139567		0.025	-0.243996		0.025	-0.161989
0.023	-0.138724		0.026	-0.242004		0.026	-0.161297
0.024	-0.137202		0.027	-0.239212		0.027	-0.16026
0.025	-0.135128		0.028	-0.235773		0.028	-0.158945
0.026	-0.13262		0.029	-0.231854		0.029	-0.157421
0.027	-0.129776		0.03	-0.227614		0.03	-0.155759
0.028	-0.126636		0.031	-0.223197		0.031	-0.154033
0.029	-0.123199		0.032	-0.218727		0.032	-0.152307
0.03	-0.119504		0.033	-0.2143		0.033	-0.150631
0.031	-0.115651		0.034	-0.209976		0.034	-0.149067
0.032	-0.1117		0.035	-0.205776		0.035	-0.147679
0.033	-0.107608		0.036	-0.20171		0.036	-0.146529
0.034	-0.103307		0.037	-0.197833		0.037	-0.145658
0.035	-0.0987874		0.038	-0.19421		0.038	-0.14506
0.036	-0.09412		0.039	-0.190844		0.039	-0.144686
0.037	-0.0894802		0.04	-0.187697		0.04	-0.144479
0.038	-0.0850243		0.041	-0.184761		0.041	-0.144404
0.039	-0.0806947		0.042	-0.182048		0.042	-0.14446
0.04	-0.0762006		0.043	-0.179539		0.043	-0.144659
0.041	-0.0711386		0.044	-0.177222		0.044	-0.144994
0.042	-0.0650997		0.045	-0.17514		0.045	-0.145431
0.043	-0.0576915		0.046	-0.173363		0.046	-0.145928
0.044	-0.0485101		0.047	-0.17192		0.047	-0.146452
0.045	-0.0371256		0.048	-0.170788		0.048	-0.146976
0.046	-0.0231154		0.049	-0.169916		0.049	-0.147462
0.047	-0.00626398		0.05	-0.169272		0.05	-0.147878
0.048	0.0130784		0.051	-0.168841		0.051	-0.14819
0.049	0.0337979		0.052	-0.168592		0.052	-0.148364
0.05	0.054212		0.053	-0.168497		0.053	-0.148379
0.051	0.0724198		0.054	-0.16856		0.054	-0.148233
0.052	0.0864985		0.055	-0.168807		0.055	-0.147908
0.053	0.0946283		0.056	-0.169256		0.056	-0.147377
0.054	0.0952667		0.057	-0.169885		0.057	-0.146661
0.055	0.0873292		0.058	-0.170644		0.058	-0.145819
0.056	0.0702402		0.059	-0.171497		0.059	-0.144934
0.057	0.0438231		0.06	-0.172461		0.06	-0.144103
0.058	0.00828568		0.061	-0.173579		0.061	-0.143397
0.059	-0.0357039		0.062	-0.174841		0.062	-0.142832
0.06	-0.087085		0.063	-0.176186		0.063	-0.142395
0.061	-0.144507		0.064	-0.177536		0.064	-0.142079
0.062	-0.206387		0.065	-0.1788		0.065	-0.141881
0.063	-0.270966		0.066	-0.179939		0.066	-0.141775
0.064	-0.336386		0.067	-0.180971		0.067	-0.141732
0.065	-0.400795		0.068	-0.181911		0.068	-0.141727
0.066	-0.462477		0.069	-0.182728		0.069	-0.141752
0.067	-0.519906		0.07	-0.183364		0.07	-0.141825
0.068	-0.571814		0.071	-0.183802		0.071	-0.141983
0.069	-0.61721		0.072	-0.184083		0.072	-0.142247
0.07	-0.655296		0.073	-0.184269		0.073	-0.142603
0.071	-0.685443		0.074	-0.184415		0.074	-0.143013
0.072	-0.707302		0.075	-0.18455		0.075	-0.143433
0.073	-0.720872		0.076	-0.184658		0.076	-0.143816
0.074	-0.726446		0.077	-0.18468		0.077	-0.144118
0.075	-0.72455		0.078	-0.184566		0.078	-0.144312
0.076	-0.715887		0.079	-0.184299		0.079	-0.144407
0.077	-0.701269		0.08	-0.183886		0.08	-0.14442
0.078	-0.681569		0.081	-0.183346		0.081	-0.144363
0.079	-0.657736		0.082	-0.182708		0.082	-0.144263
0.08	-0.630819		0.083	-0.181979		0.083	-0.144159
0.081	-0.601906		0.084	-0.181151		0.084	-0.144068
0.082	-0.572023		0.085	-0.180232		0.085	-0.143983
0.083	-0.542081		0.086	-0.179249		0.086	-0.143902
0.084	-0.512853		0.087	-0.178216		0.087	-0.143846
0.085	-0.484998		0.088	-0.177125		0.088	-0.143834
0.086	-0.459064		0.089	-0.175965		0.089	-0.14386
0.087	-0.435504		0.09	-0.174736		0.09	-0.143921
0.088	-0.414716		0.091	-0.173451		0.091	-0.144028
0.089	-0.397003		0.092	-0.172132		0.092	-0.144188
0.09	-0.382499		0.093	-0.170789		0.093	-0.144405
0.091	-0.371166		0.094	-0.169396		0.094	-0.14467
0.092	-0.362842		0.095	-0.167929		0.095	-0.14495
0.093	-0.357314		0.096	-0.166436		0.096	-0.1452
0.094	-0.354341		0.097	-0.165011		0.097	-0.1454
0.095	-0.353633		0.098	-0.163738		0.098	-0.145562
0.096	-0.354819		0.099	-0.162663		0.099	-0.145712
0.097	-0.357486		0.1	-0.161786		0.1	-0.145843
0.098	-0.361233		0.101	-0.161064		0.101	-0.145942
0.099	-0.365697		0.102	-0.160477		0.102	-0.146042
0.1	-0.370568		0.103	-0.160039		0.103	-0.146188
0.101	-0.375576		0.104	-0.159761		0.104	-0.146384
0.102	-0.38047		0.105	-0.159627		0.105	-0.146613
0.103	-0.385025		0.106	-0.159584		0.106	-0.146868
0.104	-0.389095		0.107	-0.159557		0.107	-0.147162
0.105	-0.392623		0.108	-0.159505		0.108	-0.147485
0.106	-0.395603		0.109	-0.15942		0.109	-0.147789
0.107	-0.398056		0.11	-0.159293		0.11	-0.14806
0.108	-0.399997		0.111	-0.159132		0.111	-0.148305
0.109	-0.401391		0.112	-0.158967		0.112	-0.148477
0.11	-0.402159		0.113	-0.158811		0.113	-0.148523
0.111	-0.402244		0.114	-0.158652		0.114	-0.148457
0.112	-0.401622		0.115	-0.158466		0.115	-0.14832
0.113	-0.400262		0.116	-0.158213		0.116	-0.148127
0.114	-0.39815		0.117	-0.157877		0.117	-0.147873
0.115	-0.39532		0.118	-0.157473		0.118	-0.147555
0.116	-0.391871		0.119	-0.156999		0.119	-0.147182
0.117	-0.387932		0.12	-0.156446		0.12	-0.146768
0.118	-0.383621		0.121	-0.155808		0.121	-0.146325
0.119	-0.379057		0.122	-0.15508		0.122	-0.14588
0.12	-0.374339		0.123	-0.154257		0.123	-0.145469
0.121	-0.369525		0.124	-0.153343		0.124	-0.145097
0.122	-0.364706		0.125	-0.15237		0.125	-0.144735
0.123	-0.360017		0.126	-0.151384		0.126	-0.144365
0.124	-0.355597		0.127	-0.150385		0.127	-0.144001
0.125	-0.351589		0.128	-0.149336		0.128	-0.143673
0.126	-0.348109		0.129	-0.148234		0.129	-0.143435
0.127	-0.345211		0.13	-0.1471		0.13	-0.143343
0.128	-0.342912		0.131	-0.145979		0.131	-0.143407
0.129	-0.341277		0.132	-0.144945		0.132	-0.143592
0.13	-0.340397		0.133	-0.144064		0.133	-0.143853
0.131	-0.340268		0.134	-0.143355		0.134	-0.144152
0.132	-0.340822		0.135	-0.142785		0.135	-0.144456
0.133	-0.342071		0.136	-0.142275		0.136	-0.144764
0.134	-0.344067		0.137	-0.141748		0.137	-0.145085
0.135	-0.346831		0.138	-0.141186		0.138	-0.145412
0.136	-0.350359		0.139	-0.140624		0.139	-0.145738
0.137	-0.35457		0.14	-0.140081		0.14	-0.146055
0.138	-0.359265		0.141	-0.139538		0.141	-0.146341
0.139	-0.364149		0.142	-0.13901		0.142	-0.146556
0.14	-0.368922		0.143	-0.138532		0.143	-0.14668
0.141	-0.373374		0.144	-0.138117		0.144	-0.146727
0.142	-0.377402		0.145	-0.137781		0.145	-0.146741
0.143	-0.380927		0.146	-0.137547		0.146	-0.146767
0.144	-0.383857		0.147	-0.137424		0.147	-0.146805
0.145	-0.386136		0.148	-0.137363		0.148	-0.146798
0.146	-0.387745		0.149	-0.137302		0.149	-0.14671
0.147	-0.388685		0.15	-0.137213		0.15	-0.146551
0.148	-0.388994		0.151	-0.13708		0.151	-0.146352
0.149	-0.3887		0.152	-0.136885		0.152	-0.146155
0.15	-0.387788		0.153	-0.136641		0.153	-0.14601
0.151	-0.386197		0.154	-0.136382		0.154	-0.145955
0.152	-0.383821		0.155	-0.136115		0.155	-0.145995
0.153	-0.380569		0.156	-0.135828		0.156	-0.146091
0.154	-0.376381		0.157	-0.135522		0.157	-0.146199
0.155	-0.371241		0.158	-0.135212		0.158	-0.146302
0.156	-0.365195		0.159	-0.134905		0.159	-0.146403
0.157	-0.358355		0.16	-0.134588		0.16	-0.146491
0.158	-0.350907		0.161	-0.134247		0.161	-0.146563
0.159	-0.34306		0.162	-0.133892		0.162	-0.14665
0.16	-0.334977		0.163	-0.133557		0.163	-0.146787
0.161	-0.326788		0.164	-0.133261		0.164	-0.146963
0.162	-0.318571		0.165	-0.132987		0.165	-0.147134
0.163	-0.310292		0.166	-0.132691		0.166	-0.147282
0.164	-0.30189		0.167	-0.13236		0.167	-0.147404
0.165	-0.29338		0.168	-0.132016		0.168	-0.147488
0.166	-0.284862		0.169	-0.131674		0.169	-0.14751
0.167	-0.276508		0.17	-0.131336		0.17	-0.147469
0.168	-0.268521		0.171	-0.130991		0.171	-0.147397
0.169	-0.261008		0.172	-0.130639		0.172	-0.147345
0.17	-0.253953		0.173	-0.130283		0.173	-0.147329
0.171	-0.247317		0.174	-0.129927		0.174	-0.147322
0.172	-0.241102		0.175	-0.129571		0.175	-0.147298
0.173	-0.235315		0.176	-0.129204		0.176	-0.147236
0.174	-0.229936		0.177	-0.12886		0.177	-0.147119
0.175	-0.224916		0.178	-0.128605		0.178	-0.14694
0.176	-0.220189		0.179	-0.128485		0.179	-0.146699
0.177	-0.215697		0.18	-0.12854		0.18	-0.146411
0.178	-0.211399		0.181	-0.128786		0.181	-0.146108
0.179	-0.207244		0.182	-0.129165		0.182	-0.145826
0.18	-0.203193		0.183	-0.129604		0.183	-0.145584
0.181	-0.199278		0.184	-0.130052		0.184	-0.145367
0.182	-0.195553		0.185	-0.130469		0.185	-0.145149
0.183	-0.192011		0.186	-0.130829		0.186	-0.144942
0.184	-0.188594		0.187	-0.131109		0.187	-0.144782
0.185	-0.185244		0.188	-0.131312		0.188	-0.14469
0.186	-0.181958		0.189	-0.131495		0.189	-0.144661
0.187	-0.178764		0.19	-0.131722		0.19	-0.144662
0.188	-0.175638		0.191	-0.132025		0.191	-0.144638
0.189	-0.172512		0.192	-0.132438		0.192	-0.144559
0.19	-0.169328		0.193	-0.132999		0.193	-0.144436
0.191	-0.166075		0.194	-0.13369		0.194	-0.144303
0.192	-0.162801		0.195	-0.134435		0.195	-0.144195
0.193	-0.159605		0.196	-0.13514		0.196	-0.144134
0.194	-0.156581		0.197	-0.135741		0.197	-0.144128
0.195	-0.153776		0.198	-0.136229		0.198	-0.144183
0.196	-0.151214		0.199	-0.136605		0.199	-0.144297
0.197	-0.148922		0.2	-0.13684		0.2	-0.144467
0.198	-0.146926		0.201	-0.136897		0.201	-0.14469
0.199	-0.14524		0.202	-0.136754		0.202	-0.144949
0.2	-0.143877		0.203	-0.13636		0.203	-0.145211
0.201	-0.142811		0.204	-0.135669		0.204	-0.145474
0.202	-0.14196		0.205	-0.134698		0.205	-0.145758
0.203	-0.141276		0.206	-0.133501		0.206	-0.146076
0.204	-0.140761		0.207	-0.132103		0.207	-0.146427
0.205	-0.140427		0.208	-0.130495		0.208	-0.146802
0.206	-0.140262		0.209	-0.128636		0.209	-0.14719
0.207	-0.140207		0.21	-0.126517		0.21	-0.147587
0.208	-0.140192		0.211	-0.124185		0.211	-0.147978
0.209	-0.140197		0.212	-0.121726		0.212	-0.148327
0.21	-0.140232		0.213	-0.119237		0.213	-0.148608
0.211	-0.140291		0.214	-0.116796		0.214	-0.148833
0.212	-0.140349		0.215	-0.114446		0.215	-0.149031
0.213	-0.14038		0.216	-0.112169		0.216	-0.149205
0.214	-0.140412		0.217	-0.109899		0.217	-0.149338
0.215	-0.140478		0.218	-0.107585		0.218	-0.149423
0.216	-0.140542		0.219	-0.105226		0.219	-0.149469
0.217	-0.140574		0.22	-0.102861		0.22	-0.149481
0.218	-0.140607		0.221	-0.100529		0.221	-0.149428
0.219	-0.140655		0.222	-0.0982797		0.222	-0.149257
0.22	-0.140656		0.223	-0.0961786		0.223	-0.148946
0.221	-0.140541		0.224	-0.0942576		0.224	-0.148526
0.222	-0.140307		0.225	-0.0925516		0.225	-0.148044
0.223	-0.139987		0.226	-0.0911217		0.226	-0.147539
0.224	-0.139601		0.227	-0.0900181		0.227	-0.147053
0.225	-0.139131		0.228	-0.0892576		0.228	-0.146613
0.226	-0.138565		0.229	-0.0888156		0.229	-0.146223
0.227	-0.137921		0.23	-0.0886643		0.23	-0.14589
0.228	-0.137216		0.231	-0.088809		0.231	-0.145614
0.229	-0.136496		0.232	-0.0892533		0.232	-0.145384
0.23	-0.135829		0.233	-0.0899658		0.233	-0.145196
0.231	-0.135225		0.234	-0.0909014		0.234	-0.145043
0.232	-0.134625		0.235	-0.0920156		0.235	-0.144924
0.233	-0.133988		0.236	-0.0932307		0.236	-0.144832
0.234	-0.133327		0.237	-0.0944368		0.237	-0.144753
0.235	-0.132683		0.238	-0.0955641		0.238	-0.144682
0.236	-0.132079		0.239	-0.0966247		0.239	-0.144632
0.237	-0.131522		0.24	-0.0976352		0.24	-0.144621
0.238	-0.131041		0.241	-0.0985494		0.241	-0.144656
0.239	-0.130669		0.242	-0.099348		0.242	-0.144728
0.24	-0.13037		0.243	-0.100064		0.243	-0.14483
0.241	-0.130039		0.244	-0.100688		0.244	-0.144966
0.242	-0.129625		0.245	-0.101202		0.245	-0.145131
0.243	-0.129195		0.246	-0.101656		0.246	-0.145305
0.244	-0.128847		0.247	-0.102121		0.247	-0.145493
0.245	-0.128629		0.248	-0.10263		0.248	-0.145739
0.246	-0.128569		0.249	-0.103188		0.249	-0.146068
0.247	-0.128674		0.25	-0.103791		0.25	-0.146455
0.248	-0.128896		0.251	-0.104458		0.251	-0.146825
0.249	-0.12917		0.252	-0.105232		0.252	-0.147095
0.25	-0.129474		0.253	-0.106136		0.253	-0.147216
0.251	-0.12983		0.254	-0.10717		0.254	-0.147164
0.252	-0.130269		0.255	-0.108322		0.255	-0.146943
0.253	-0.13079		0.256	-0.10957		0.256	-0.146582
0.254	-0.131304		0.257	-0.110885		0.257	-0.146127
0.255	-0.131695		0.258	-0.112238		0.258	-0.145626
0.256	-0.131943		0.259	-0.113603		0.259	-0.145138
0.257	-0.132113		0.26	-0.114948		0.26	-0.144717
0.258	-0.132162		0.261	-0.116242		0.261	-0.144392
0.259	-0.131823		0.262	-0.117483		0.262	-0.144192
0.26	-0.130631		0.263	-0.118669		0.263	-0.144141
0.261	-0.128086		0.264	-0.11976		0.264	-0.144223
0.262	-0.123817		0.265	-0.120711		0.265	-0.144405
0.263	-0.117544		0.266	-0.121507		0.266	-0.144659
0.264	-0.108887		0.267	-0.122182		0.267	-0.144938
0.265	-0.0973024		0.268	-0.12279		0.268	-0.145181
0.266	-0.0822877		0.269	-0.12333		0.269	-0.145353
0.267	-0.0637617		0.27	-0.123747		0.27	-0.145457
0.268	-0.0423116		0.271	-0.124016		0.271	-0.145501
0.269	-0.0190844		0.272	-0.124154		0.272	-0.14549
0.27	0.00453659		0.273	-0.124187		0.273	-0.145446
0.271	0.0272003		0.274	-0.124128		0.274	-0.145378
0.272	0.0477489		0.275	-0.12397		0.275	-0.145271
0.273	0.0652863		0.276	-0.123696		0.276	-0.145108
0.274	0.0791214		0.277	-0.123337		0.277	-0.144899
0.275	0.088692		0.278	-0.122949		0.278	-0.144683
0.276	0.0936051		0.279	-0.122567		0.279	-0.144491
0.277	0.0937067		0.28	-0.122191		0.28	-0.144321
0.278	0.0890739		0.281	-0.121791		0.281	-0.144151
0.279	0.0800052		0.282	-0.121322		0.282	-0.143963
0.28	0.0669943		0.283	-0.120752		0.283	-0.14377
0.281	0.050624		0.284	-0.120101		0.284	-0.143587
0.282	0.0314785		0.285	-0.119433		0.285	-0.143414
0.283	0.0101357		0.286	-0.118779		0.286	-0.143263
0.284	-0.0127901		0.287	-0.118113		0.287	-0.14317
0.285	-0.0366369		0.288	-0.117413		0.288	-0.14317
0.286	-0.0607584		0.289	-0.116673		0.289	-0.143256
0.287	-0.0845597		0.29	-0.115892		0.29	-0.143394
0.288	-0.10748		0.291	-0.115059		0.291	-0.143536
0.289	-0.129011		0.292	-0.114166		0.292	-0.14366
0.29	-0.148687		0.293	-0.113233		0.293	-0.143785
0.291	-0.166064		0.294	-0.112295		0.294	-0.143943
0.292	-0.180784		0.295	-0.111392		0.295	-0.144145
0.293	-0.192674		0.296	-0.110568		0.296	-0.144387
0.294	-0.201756		0.297	-0.10982		0.297	-0.144651
0.295	-0.208174		0.298	-0.109091		0.298	-0.144925
0.296	-0.212085		0.299	-0.108356		0.299	-0.145211
0.297	-0.213675		0.3	-0.10767		0.3	-0.145521
0.298	-0.213223		0.301	-0.107091		0.301	-0.145849
0.299	-0.211063		0.302	-0.106622		0.302	-0.14617
0.3	-0.207523		0.303	-0.106224		0.303	-0.146456
0.301	-0.202892		0.304	-0.105856		0.304	-0.146679
0.302	-0.197415		0.305	-0.105505		0.305	-0.146822
0.303	-0.191336		0.306	-0.105157		0.306	-0.146901
0.304	-0.184928		0.307	-0.104806		0.307	-0.146946
0.305	-0.178445		0.308	-0.104479		0.308	-0.146952
0.306	-0.172078		0.309	-0.104211		0.309	-0.146905
0.307	-0.165995		0.31	-0.104008		0.31	-0.146817
0.308	-0.160356		0.311	-0.103842		0.311	-0.1467
0.309	-0.155268		0.312	-0.103666		0.312	-0.146547
0.31	-0.150754		0.313	-0.103471		0.313	-0.146355
0.311	-0.146789		0.314	-0.103294		0.314	-0.146137
0.312	-0.143356		0.315	-0.103149		0.315	-0.145905
0.313	-0.140443		0.316	-0.10298		0.316	-0.145659
0.314	-0.138034		0.317	-0.1027		0.317	-0.145384
0.315	-0.136113		0.318	-0.102269		0.318	-0.145082
0.316	-0.13464		0.319	-0.101741		0.319	-0.144765
0.317	-0.133591		0.32	-0.10118		0.32	-0.144444
0.318	-0.132946		0.321	-0.100604		0.321	-0.14413
0.319	-0.132625		0.322	-0.100013		0.322	-0.143831
0.32	-0.132527		0.323	-0.0994233		0.323	-0.143557
0.321	-0.132608		0.324	-0.0988525		0.324	-0.143325
0.322	-0.132819		0.325	-0.0983006		0.325	-0.143128
0.323	-0.133043		0.326	-0.0977575		0.326	-0.142934
0.324	-0.13317		0.327	-0.0972397		0.327	-0.14273
0.325	-0.133156		0.328	-0.0967967		0.328	-0.142518
0.326	-0.132952		0.329	-0.0964815		0.329	-0.14231
0.327	-0.132518		0.33	-0.0963469		0.33	-0.142119
0.328	-0.131954		0.331	-0.0964347		0.331	-0.141963
0.329	-0.131471		0.332	-0.0967278		0.332	-0.141864
0.33	-0.131211		0.333	-0.097138		0.333	-0.141888
0.331	-0.131149		0.334	-0.0974852		0.334	-0.142116
0.332	-0.131037		0.335	-0.0973644		0.335	-0.142578
0.333	-0.130355		0.336	-0.0960191		0.336	-0.14327
0.334	-0.128386		0.337	-0.0924849		0.337	-0.144235
0.335	-0.124519		0.338	-0.0858915		0.338	-0.145553
0.336	-0.118527		0.339	-0.0756199		0.339	-0.147236
0.337	-0.110612		0.34	-0.0613117		0.34	-0.149136
0.338	-0.101322		0.341	-0.0428355		0.341	-0.150973
0.339	-0.0914696		0.342	-0.0202464		0.342	-0.152449
0.34	-0.0819831		0.343	0.00627341		0.343	-0.153378
0.341	-0.0737026		0.344	0.0364385		0.344	-0.153786
0.342	-0.0672567		0.345	0.0698499		0.345	-0.153957
0.343	-0.0630832		0.346	0.106043		0.346	-0.154408
0.344	-0.0615161		0.347	0.144506		0.347	-0.155791
0.345	-0.06281		0.348	0.184611		0.348	-0.158735
0.346	-0.0670505		0.349	0.225551		0.349	-0.163749
0.347	-0.0740858		0.35	0.266347		0.35	-0.171227
0.348	-0.0835424		0.351	0.3059		0.351	-0.181494
0.349	-0.0948431		0.352	0.343038		0.352	-0.194807
0.35	-0.107273		0.353	0.376574		0.353	-0.211347
0.351	-0.120101		0.354	0.405363		0.354	-0.231292
0.352	-0.132633		0.355	0.428318		0.355	-0.254923
0.353	-0.144222		0.356	0.444434		0.356	-0.282652
0.354	-0.154414		0.357	0.452847		0.357	-0.314904
0.355	-0.163053		0.358	0.452865		0.358	-0.351661
0.356	-0.170186		0.359	0.443992		0.359	-0.391872
0.357	-0.175978		0.36	0.425943		0.36	-0.433366
0.358	-0.180752		0.361	0.398662		0.361	-0.473354
0.359	-0.184958		0.362	0.362323		0.362	-0.509014
0.36	-0.189097		0.363	0.317277		0.363	-0.537842
0.361	-0.19374		0.364	0.26397		0.364	-0.557843
0.362	-0.199547		0.365	0.202857		0.365	-0.567676
0.363	-0.207216		0.366	0.134357		0.366	-0.566669
0.364	-0.217503		0.367	0.0588392		0.367	-0.554747
0.365	-0.231314		0.368	-0.0233659		0.368	-0.532366
0.366	-0.24971		0.369	-0.111959		0.369	-0.500392
0.367	-0.27377		0.37	-0.206625		0.37	-0.459983
0.368	-0.30439		0.371	-0.306898		0.371	-0.412518
0.369	-0.342162		0.372	-0.41204		0.372	-0.359568
0.37	-0.387251		0.373	-0.520909		0.373	-0.302815
0.371	-0.439186		0.374	-0.631781		0.374	-0.243956
0.372	-0.496823		0.375	-0.74233		0.375	-0.184634
0.373	-0.558552		0.376	-0.849866		0.376	-0.126386
0.374	-0.622596		0.377	-0.951731		0.377	-0.0705819
0.375	-0.687261		0.378	-1.04563		0.378	-0.0183937
0.376	-0.751062		0.379	-1.12978		0.379	0.0292194
0.377	-0.81278		0.38	-1.20298		0.38	0.0715271
0.378	-0.871509		0.381	-1.26462		0.381	0.108056
0.379	-0.926636		0.382	-1.31474		0.382	0.138569
0.38	-0.977828		0.383	-1.35382		0.383	0.163
0.381	-1.02502		0.384	-1.38279		0.384	0.181407
0.382	-1.06832		0.385	-1.40285		0.385	0.193958
0.383	-1.10799		0.386	-1.4154		0.386	0.200907
0.384	-1.1444		0.387	-1.42203		0.387	0.202612
0.385	-1.17807		0.388	-1.42444		0.388	0.199569
0.386	-1.20954		0.389	-1.42427		0.389	0.192379
0.387	-1.23924		0.39	-1.42256		0.39	0.181693
0.388	-1.26721		0.391	-1.41937		0.391	0.168209
0.389	-1.29285		0.392	-1.4138		0.392	0.152651
0.39	-1.31504		0.393	-1.40468		0.393	0.135726
0.391	-1.33243		0.394	-1.39117		0.394	0.118075
0.392	-1.3438		0.395	-1.37303		0.395	0.100259
0.393	-1.34831		0.396	-1.35076		0.396	0.0827608
0.394	-1.34577		0.397	-1.3254		0.397	0.0659949
0.395	-1.33656		0.398	-1.29822		0.398	0.0503184
0.396	-1.32151		0.399	-1.27047		0.399	0.0360371
0.397	-1.30179		0.4	-1.24326		0.4	0.0233931
0.398	-1.27867		0.401	-1.21746		0.401	0.0125342
0.399	-1.25339		0.402	-1.19376		0.402	0.00347751
0.4	-1.22713		0.403	-1.17262		0.403	-0.00388053
0.401	-1.20095		0.404	-1.1544		0.404	-0.00967528
0.402	-1.17578		0.405	-1.13933		0.405	-0.0140285
0.403	-1.15233		0.406	-1.12754		0.406	-0.0170816
0.404	-1.1312		0.407	-1.11895		0.407	-0.0190055
0.405	-1.11287		0.408	-1.11329		0.408	-0.0200067
0.406	-1.09761		0.409	-1.11013		0.409	-0.0203225
0.407	-1.08542		0.41	-1.10901		0.41	-0.0201663
0.408	-1.07609		0.411	-1.10957		0.411	-0.0197034
0.409	-1.06931		0.412	-1.11162		0.412	-0.0190623
0.41	-1.06471		0.413	-1.11513		0.413	-0.0183474
0.411	-1.06194		0.414	-1.12019		0.414	-0.017675
0.412	-1.06073		0.415	-1.12696		0.415	-0.0171976
0.413	-1.06095		0.416	-1.13564		0.416	-0.0170718
0.414	-1.06261		0.417	-1.14635		0.417	-0.0174243
0.415	-1.06576		0.418	-1.15902		0.418	-0.0183433
0.416	-1.0705		0.419	-1.17334		0.419	-0.0198761
0.417	-1.07697		0.42	-1.18883		0.42	-0.0220299
0.418	-1.08521		0.421	-1.20489		0.421	-0.0247554
0.419	-1.0951		0.422	-1.22095		0.422	-0.0279455
0.42	-1.10638		0.423	-1.23644		0.423	-0.0314809
0.421	-1.11869		0.424	-1.25086		0.424	-0.0352834
0.422	-1.13148		0.425	-1.26381		0.425	-0.0393235
0.423	-1.14407		0.426	-1.275		0.426	-0.0435586
0.424	-1.15583		0.427	-1.28423		0.427	-0.047904
0.425	-1.16624		0.428	-1.29143		0.428	-0.0522758
0.426	-1.17494		0.429	-1.29661		0.429	-0.0565797
0.427	-1.18167		0.43	-1.2999		0.43	-0.0606989
0.428	-1.18625		0.431	-1.30153		0.431	-0.0645423
0.429	-1.18866		0.432	-1.30168		0.432	-0.0680495
0.43	-1.18905		0.433	-1.30055		0.433	-0.0711742
0.431	-1.18766		0.434	-1.29838		0.434	-0.0738948
0.432	-1.1848		0.435	-1.29541		0.435	-0.0762165
0.433	-1.1808		0.436	-1.29189		0.436	-0.0781712
0.434	-1.17598		0.437	-1.2881		0.437	-0.079803
0.435	-1.17071		0.438	-1.28427		0.438	-0.0811315
0.436	-1.16534		0.439	-1.28054		0.439	-0.0821478
0.437	-1.16012		0.44	-1.27696		0.44	-0.082864
0.438	-1.15522		0.441	-1.27359		0.441	-0.0833225
0.439	-1.15079		0.442	-1.27045		0.442	-0.0835424
0.44	-1.14698		0.443	-1.26751		0.443	-0.0834997
0.441	-1.14388		0.444	-1.26473		0.444	-0.0831566
0.442	-1.14149		0.445	-1.26203		0.445	-0.0825086
0.443	-1.13975		0.446	-1.25929		0.446	-0.0815986
0.444	-1.13859		0.447	-1.25638		0.447	-0.0804757
0.445	-1.13794		0.448	-1.2532		0.448	-0.0791598
0.446	-1.13769		0.449	-1.24967		0.449	-0.077624
0.447	-1.13769		0.45	-1.24573		0.45	-0.0758112
0.448	-1.13775		0.451	-1.24138		0.451	-0.0736945
0.449	-1.13762		0.452	-1.23656		0.452	-0.0713202
0.45	-1.13716		0.453	-1.23123		0.453	-0.0687773
0.451	-1.13624		0.454	-1.22538		0.454	-0.0661407
0.452	-1.13474		0.455	-1.21909		0.455	-0.0634736
0.453	-1.13256		0.456	-1.21239		0.456	-0.0608532
0.454	-1.1296		0.457	-1.20533		0.457	-0.0583682
0.455	-1.12582		0.458	-1.198		0.458	-0.0561278
0.456	-1.12124		0.459	-1.19045		0.459	-0.0542367
0.457	-1.11591		0.46	-1.18268		0.46	-0.0527174
0.458	-1.10984		0.461	-1.17462		0.461	-0.0515114
0.459	-1.10306		0.462	-1.16625		0.462	-0.050558
0.46	-1.09563		0.463	-1.15758		0.463	-0.0498217
0.461	-1.08766		0.464	-1.14865		0.464	-0.049286
0.462	-1.0793		0.465	-1.13953		0.465	-0.0489761
0.463	-1.07066		0.466	-1.13025		0.466	-0.0489658
0.464	-1.06188		0.467	-1.12076		0.467	-0.0493209
0.465	-1.05304		0.468	-1.11103		0.468	-0.0500479
0.466	-1.04422		0.469	-1.10108		0.469	-0.0511139
0.467	-1.03552		0.47	-1.09095		0.47	-0.0524899
0.468	-1.02697		0.471	-1.08069		0.471	-0.0541859
0.469	-1.01859		0.472	-1.07032		0.472	-0.0562813
0.47	-1.01033		0.473	-1.05983		0.473	-0.0589102
0.471	-1.00215		0.474	-1.04922		0.474	-0.0621856
0.472	-0.993954		0.475	-1.03845		0.475	-0.0661437
0.473	-0.98559		0.476	-1.02743		0.476	-0.0707869
0.474	-0.976915		0.477	-1.01601		0.477	-0.0761681
0.475	-0.967832		0.478	-1.00411		0.478	-0.082382
0.476	-0.958302		0.479	-0.991654		0.479	-0.0894616
0.477	-0.948327		0.48	-0.978592		0.48	-0.0973206
0.478	-0.937914		0.481	-0.964863		0.481	-0.105782
0.479	-0.927088		0.482	-0.950438		0.482	-0.114623
0.48	-0.915883		0.483	-0.935308		0.483	-0.123601
0.481	-0.904294		0.484	-0.919472		0.484	-0.132421
0.482	-0.892305		0.485	-0.902949		0.485	-0.14076
0.483	-0.879934		0.486	-0.885806		0.486	-0.148393
0.484	-0.867274		0.487	-0.868126		0.487	-0.155259
0.485	-0.85448		0.488	-0.849994		0.488	-0.16139
0.486	-0.841669		0.489	-0.831491		0.489	-0.166825
0.487	-0.828847		0.49	-0.81268		0.49	-0.171587
0.488	-0.815988		0.491	-0.793597		0.491	-0.175685
0.489	-0.803102		0.492	-0.774266		0.492	-0.179103
0.49	-0.790184		0.493	-0.754678		0.493	-0.181798
0.491	-0.777181		0.494	-0.734823		0.494	-0.183731
0.492	-0.763994		0.495	-0.714711		0.495	-0.184889
0.493	-0.750468		0.496	-0.694322		0.496	-0.185286
0.494	-0.736436		0.497	-0.673603		0.497	-0.184982
0.495	-0.721833		0.498	-0.652561		0.498	-0.184101
0.496	-0.706707		0.499	-0.631309		0.499	-0.182798
0.497	-0.691168		0.5	-0.609966		0.5	-0.181179
0.498	-0.67547		0.501	-0.588587		0.501	-0.179284
0.499	-0.660052		0.502	-0.56723		0.502	-0.177133
0.5	-0.645413		0.503	-0.54597		0.503	-0.174765
0.501	-0.632025		0.504	-0.524864		0.504	-0.172228
0.502	-0.620351		0.505	-0.503955		0.505	-0.169554
0.503	-0.610825		0.506	-0.483293		0.506	-0.166773
0.504	-0.603809		0.507	-0.462925		0.507	-0.16394
0.505	-0.599533		0.508	-0.442873		0.508	-0.161138
0.506	-0.598009		0.509	-0.423119		0.509	-0.158441
0.507	-0.598986		0.51	-0.403611		0.51	-0.155885
0.508	-0.602009		0.511	-0.384288		0.511	-0.153507
0.509	-0.606548		0.512	-0.365114		0.512	-0.151343
0.51	-0.612074		0.513	-0.346107		0.513	-0.149421
0.511	-0.618003		0.514	-0.327356		0.514	-0.14779
0.512	-0.623701		0.515	-0.30901		0.515	-0.146545
0.513	-0.628594		0.516	-0.291213		0.516	-0.145786
0.514	-0.632206		0.517	-0.274039		0.517	-0.145551
0.515	-0.634183		0.518	-0.257495		0.518	-0.145823
0.516	-0.634299		0.519	-0.241575		0.519	-0.146554
0.517	-0.632447		0.52	-0.226312		0.52	-0.147673
0.518	-0.628646		0.521	-0.211809		0.521	-0.149119
0.519	-0.623044		0.522	-0.198202		0.522	-0.150852
0.52	-0.615885		0.523	-0.185617		0.523	-0.152839
0.521	-0.607485		0.524	-0.174184		0.524	-0.155037
0.522	-0.5982		0.525	-0.164014		0.525	-0.157373
0.523	-0.588386		0.526	-0.155145		0.526	-0.159746
0.524	-0.578372		0.527	-0.147585		0.527	-0.162035
0.525	-0.568459		0.528	-0.141341		0.528	-0.16412
0.526	-0.558931		0.529	-0.136388		0.529	-0.165906
0.527	-0.550025		0.53	-0.132676		0.53	-0.167352
0.528	-0.541896		0.531	-0.130137		0.531	-0.168461
0.529	-0.534627		0.532	-0.128683		0.532	-0.169238
0.53	-0.528254		0.533	-0.128243		0.533	-0.169703
0.531	-0.522797		0.534	-0.128726		0.534	-0.169881
0.532	-0.518256		0.535	-0.13		0.535	-0.169797
0.533	-0.514524		0.536	-0.131918		0.536	-0.169481
0.534	-0.511394		0.537	-0.134347		0.537	-0.168979
0.535	-0.508709		0.538	-0.137191		0.538	-0.168324
0.536	-0.506408		0.539	-0.140402		0.539	-0.167521
0.537	-0.504443		0.54	-0.143932		0.54	-0.166548
0.538	-0.502757		0.541	-0.147698		0.541	-0.165376
0.539	-0.501279		0.542	-0.151602		0.542	-0.164005
0.54	-0.499928		0.543	-0.155566		0.543	-0.162507
0.541	-0.498624		0.544	-0.159519		0.544	-0.160979
0.542	-0.497292		0.545	-0.163413		0.545	-0.159508
0.543	-0.495867		0.546	-0.167244		0.546	-0.158181
0.544	-0.494247		0.547	-0.171041		0.547	-0.157066
0.545	-0.492318		0.548	-0.174843		0.548	-0.156168
0.546	-0.490022		0.549	-0.178658		0.549	-0.155445
0.547	-0.487363		0.55	-0.182471		0.55	-0.154883
0.548	-0.484311		0.551	-0.186287		0.551	-0.154493
0.549	-0.480725		0.552	-0.19012		0.552	-0.154261
0.55	-0.476437		0.553	-0.193947		0.553	-0.154153
0.551	-0.4714		0.554	-0.197709		0.554	-0.154148
0.552	-0.465711		0.555	-0.201359		0.555	-0.154224
0.553	-0.459511		0.556	-0.2049		0.556	-0.154323
0.554	-0.452885		0.557	-0.208341		0.557	-0.15438
0.555	-0.445874		0.558	-0.211638		0.558	-0.154358
0.556	-0.438552		0.559	-0.214717		0.559	-0.154238
0.557	-0.431019		0.56	-0.217515		0.56	-0.154
0.558	-0.423351		0.561	-0.21997		0.561	-0.153615
0.559	-0.415592		0.562	-0.221999		0.562	-0.153067
0.56	-0.407766		0.563	-0.223509		0.563	-0.152333
0.561	-0.399929		0.564	-0.224438		0.564	-0.151358
0.562	-0.39223		0.565	-0.224752		0.565	-0.150075
0.563	-0.384856		0.566	-0.224458		0.566	-0.148432
0.564	-0.377957		0.567	-0.223605		0.567	-0.146396
0.565	-0.371649		0.568	-0.22225		0.568	-0.143946
0.566	-0.366007		0.569	-0.220439		0.569	-0.141067
0.567	-0.361082		0.57	-0.218253		0.57	-0.137767
0.568	-0.356938		0.571	-0.215847		0.571	-0.134082
0.569	-0.353584		0.572	-0.213382		0.572	-0.130069
0.57	-0.350906		0.573	-0.210969		0.573	-0.125849
0.571	-0.348717		0.574	-0.20867		0.574	-0.121634
0.572	-0.346842		0.575	-0.206474		0.575	-0.117711
0.573	-0.345113		0.576	-0.204351		0.576	-0.114362
0.574	-0.343389		0.577	-0.202342		0.577	-0.111817
0.575	-0.34161		0.578	-0.200543		0.578	-0.110238
0.576	-0.33976		0.579	-0.199075		0.579	-0.109725
0.577	-0.337861		0.58	-0.198049		0.58	-0.110281
0.578	-0.335982		0.581	-0.197527		0.581	-0.111842
0.579	-0.334161		0.582	-0.197504		0.582	-0.114297
0.58	-0.332393		0.583	-0.19798		0.583	-0.117492
0.581	-0.3307		0.584	-0.199004		0.584	-0.121244
0.582	-0.329151		0.585	-0.200635		0.585	-0.125349
0.583	-0.327909		0.586	-0.202899		0.586	-0.129594
0.584	-0.327246		0.587	-0.205782		0.587	-0.13379
0.585	-0.327421		0.588	-0.209223		0.588	-0.137791
0.586	-0.328553		0.589	-0.213122		0.589	-0.141495
0.587	-0.330642		0.59	-0.217366		0.59	-0.144823
0.588	-0.333616		0.591	-0.221857		0.591	-0.147684
0.589	-0.337362		0.592	-0.226572		0.592	-0.149963
0.59	-0.341721		0.593	-0.231535		0.593	-0.151555
0.591	-0.346513		0.594	-0.23674		0.594	-0.15241
0.592	-0.351562		0.595	-0.242129		0.595	-0.152561
0.593	-0.356669		0.596	-0.247594		0.596	-0.152121
0.594	-0.36162		0.597	-0.25302		0.597	-0.15124
0.595	-0.366256		0.598	-0.258332		0.598	-0.150059
0.596	-0.370526		0.599	-0.26348		0.599	-0.148693
0.597	-0.374447		0.6	-0.268401		0.6	-0.147225
0.598	-0.378003		0.601	-0.273068		0.601	-0.14572
0.599	-0.381129		0.602	-0.277501		0.602	-0.144222
0.6	-0.383735		0.603	-0.281704		0.603	-0.142787
0.601	-0.385742		0.604	-0.285634		0.604	-0.141474
0.602	-0.387114		0.605	-0.289214		0.605	-0.14031
0.603	-0.387862		0.606	-0.292394		0.606	-0.139279
0.604	-0.388027		0.607	-0.295159		0.607	-0.138339
0.605	-0.387671		0.608	-0.297464		0.608	-0.137444
0.606	-0.386868		0.609	-0.299261		0.609	-0.13656
0.607	-0.385694		0.61	-0.300551		0.61	-0.135641
0.608	-0.384232		0.611	-0.301341		0.611	-0.134639
0.609	-0.382575		0.612	-0.301597		0.612	-0.133556
0.61	-0.38079		0.613	-0.30128		0.613	-0.132426
0.611	-0.378928		0.614	-0.300397		0.614	-0.131281
0.612	-0.377037		0.615	-0.299011		0.615	-0.130157
0.613	-0.375161		0.616	-0.297201		0.616	-0.129089
0.614	-0.373358		0.617	-0.295028		0.617	-0.128109
0.615	-0.371691		0.618	-0.292552		0.618	-0.127223
0.616	-0.370207		0.619	-0.289853		0.619	-0.12642
0.617	-0.36898		0.62	-0.287024		0.62	-0.125711
0.618	-0.368085		0.621	-0.284175		0.621	-0.125112
0.619	-0.367567		0.622	-0.281434		0.622	-0.124602
0.62	-0.367428		0.623	-0.278897		0.623	-0.124151
0.621	-0.367626		0.624	-0.276617		0.624	-0.123743
0.622	-0.368134		0.625	-0.274625		0.625	-0.123383
0.623	-0.368946		0.626	-0.272943		0.626	-0.1231
0.624	-0.369985		0.627	-0.271585		0.627	-0.122928
0.625	-0.371126		0.628	-0.270547		0.628	-0.122883
0.626	-0.372285		0.629	-0.269794		0.629	-0.122943
0.627	-0.373428		0.63	-0.269323		0.63	-0.123055
0.628	-0.374536		0.631	-0.269189		0.631	-0.12317
0.629	-0.375591		0.632	-0.269443		0.632	-0.12326
0.63	-0.37663		0.633	-0.270099		0.633	-0.123313
0.631	-0.37776		0.634	-0.271133		0.634	-0.123333
0.632	-0.379114		0.635	-0.272494		0.635	-0.123341
0.633	-0.380795		0.636	-0.274139		0.636	-0.123363
0.634	-0.382822		0.637	-0.276046		0.637	-0.123425
0.635	-0.385159		0.638	-0.278219		0.638	-0.123531
0.636	-0.387775		0.639	-0.280653		0.639	-0.123683
0.637	-0.390591		0.64	-0.283319		0.64	-0.123899
0.638	-0.393517		0.641	-0.286135		0.641	-0.12419
0.639	-0.39655		0.642	-0.288979		0.642	-0.12454
0.64	-0.399692		0.643	-0.291796		0.643	-0.124934
0.641	-0.402854		0.644	-0.294599		0.644	-0.125382
0.642	-0.405934		0.645	-0.297384		0.645	-0.125906
0.643	-0.408894		0.646	-0.300103		0.646	-0.12652
0.644	-0.411744		0.647	-0.302694		0.647	-0.127229
0.645	-0.414481		0.648	-0.305113		0.648	-0.128032
0.646	-0.417049		0.649	-0.307357		0.649	-0.128907
0.647	-0.41937		0.65	-0.309438		0.65	-0.129809
0.648	-0.42138		0.651	-0.311351		0.651	-0.130677
0.649	-0.422988		0.652	-0.313076		0.652	-0.131439
0.65	-0.424062		0.653	-0.31462		0.653	-0.132052
0.651	-0.42449		0.654	-0.316014		0.654	-0.132524
0.652	-0.424228		0.655	-0.317267		0.655	-0.132885
0.653	-0.423305		0.656	-0.318322		0.656	-0.133164
0.654	-0.421784		0.657	-0.319097		0.657	-0.133387
0.655	-0.419744		0.658	-0.319597		0.658	-0.133582
0.656	-0.417266		0.659	-0.319878		0.659	-0.13379
0.657	-0.414433		0.66	-0.319927		0.66	-0.13404
0.658	-0.411323		0.661	-0.319702		0.661	-0.134336
0.659	-0.407978		0.662	-0.319196		0.662	-0.134671
0.66	-0.404436		0.663	-0.318428		0.663	-0.135043
0.661	-0.400756		0.664	-0.317422		0.664	-0.135439
0.662	-0.397007		0.665	-0.316183		0.665	-0.135816
0.663	-0.393262		0.666	-0.314682		0.666	-0.136116
0.664	-0.389595		0.667	-0.312879		0.667	-0.136297
0.665	-0.386027		0.668	-0.310757		0.668	-0.136347
0.666	-0.382532		0.669	-0.308366		0.669	-0.136271
0.667	-0.379119		0.67	-0.305785		0.67	-0.136087
0.668	-0.37589		0.671	-0.303038		0.671	-0.135812
0.669	-0.373032		0.672	-0.300077		0.672	-0.135455
0.67	-0.370724		0.673	-0.296866		0.673	-0.135017
0.671	-0.369045		0.674	-0.293436		0.674	-0.134524
0.672	-0.367982		0.675	-0.289851		0.675	-0.134009
0.673	-0.367446		0.676	-0.286153		0.676	-0.133491
0.674	-0.367277		0.677	-0.282396		0.677	-0.132984
0.675	-0.367318		0.678	-0.278655		0.678	-0.132496
0.676	-0.367482		0.679	-0.274974		0.679	-0.132041
0.677	-0.367728		0.68	-0.271348		0.68	-0.131648
0.678	-0.368017		0.681	-0.267777		0.681	-0.131361
0.679	-0.36833		0.682	-0.264271		0.682	-0.131186
0.68	-0.368674		0.683	-0.260806		0.683	-0.131097
0.681	-0.369056		0.684	-0.257358		0.684	-0.131082
0.682	-0.369469		0.685	-0.253969		0.685	-0.131176
0.683	-0.369933		0.686	-0.250734		0.686	-0.131408
0.684	-0.370482		0.687	-0.247725		0.687	-0.131773
0.685	-0.371102		0.688	-0.244943		0.688	-0.132227
0.686	-0.37173		0.689	-0.242409		0.689	-0.132696
0.687	-0.372293		0.69	-0.240204		0.69	-0.133121
0.688	-0.372767		0.691	-0.238382		0.691	-0.133478
0.689	-0.373213		0.692	-0.23692		0.692	-0.133744
0.69	-0.373693		0.693	-0.23575		0.693	-0.133894
0.691	-0.374247		0.694	-0.23482		0.694	-0.13392
0.692	-0.374934		0.695	-0.234109		0.695	-0.133823
0.693	-0.375845		0.696	-0.233607		0.696	-0.133594
0.694	-0.377065		0.697	-0.23331		0.697	-0.133238
0.695	-0.378588		0.698	-0.233197		0.698	-0.132825
0.696	-0.380324		0.699	-0.233212		0.699	-0.132441
0.697	-0.382187		0.7	-0.2333		0.7	-0.132114
0.698	-0.384123		0.701	-0.233429		0.701	-0.131833
0.699	-0.386069		0.702	-0.233567		0.702	-0.131588
0.7	-0.387934		0.703	-0.233667		0.703	-0.131348
0.701	-0.389624		0.704	-0.233674		0.704	-0.131055
0.702	-0.391065		0.705	-0.233535		0.705	-0.13069
0.703	-0.392192		0.706	-0.233208		0.706	-0.130299
0.704	-0.392954		0.707	-0.232692		0.707	-0.129951
0.705	-0.393383		0.708	-0.232003		0.708	-0.129671
0.706	-0.393521		0.709	-0.231166		0.709	-0.129445
0.707	-0.393258		0.71	-0.230226		0.71	-0.129286
0.708	-0.392407		0.711	-0.229218		0.711	-0.129232
0.709	-0.390841		0.712	-0.228128		0.712	-0.129287
0.71	-0.388471		0.713	-0.226911		0.713	-0.129424
0.711	-0.385226		0.714	-0.225504		0.714	-0.129628
0.712	-0.381132		0.715	-0.223819		0.715	-0.129908
0.713	-0.37636		0.716	-0.22179		0.716	-0.130274
0.714	-0.371177		0.717	-0.219417		0.717	-0.130712
0.715	-0.365891		0.718	-0.216738		0.718	-0.131178
0.716	-0.36076		0.719	-0.213804		0.719	-0.131598
0.717	-0.355949		0.72	-0.210681		0.72	-0.131902
0.718	-0.351567		0.721	-0.207414		0.721	-0.13206
0.719	-0.347698		0.722	-0.20401		0.722	-0.132075
0.72	-0.344385		0.723	-0.200522		0.723	-0.131966
0.721	-0.341632		0.724	-0.197088		0.724	-0.131758
0.722	-0.339402		0.725	-0.193824		0.725	-0.131469
0.723	-0.337589		0.726	-0.190767		0.726	-0.131118
0.724	-0.336095		0.727	-0.187928		0.727	-0.130725
0.725	-0.334869		0.728	-0.185341		0.728	-0.130318
0.726	-0.333857		0.729	-0.183039		0.729	-0.129923
0.727	-0.332981		0.73	-0.181048		0.73	-0.129556
0.728	-0.332169		0.731	-0.179392		0.731	-0.129211
0.729	-0.3314		0.732	-0.178065		0.732	-0.128846
0.73	-0.330713		0.733	-0.176999		0.733	-0.128411
0.731	-0.330146		0.734	-0.176113		0.734	-0.127906
0.732	-0.329704		0.735	-0.175395		0.735	-0.12737
0.733	-0.329374		0.736	-0.174874		0.736	-0.12685
0.734	-0.32919		0.737	-0.174585		0.737	-0.126377
0.735	-0.32925		0.738	-0.174584		0.738	-0.125976
0.736	-0.329623		0.739	-0.174892		0.739	-0.125669
0.737	-0.3303		0.74	-0.175456		0.74	-0.125478
0.738	-0.331223		0.741	-0.176201		0.741	-0.125427
0.739	-0.332338		0.742	-0.177076		0.742	-0.12553
0.74	-0.333592		0.743	-0.178076		0.743	-0.125789
0.741	-0.334954		0.744	-0.179214		0.744	-0.126189
0.742	-0.336474		0.745	-0.180489		0.745	-0.126714
0.743	-0.338183		0.746	-0.181878		0.746	-0.127352
0.744	-0.340009		0.747	-0.183311		0.747	-0.128084
0.745	-0.341852		0.748	-0.184712		0.748	-0.128863
0.746	-0.343619		0.749	-0.186042		0.749	-0.129626
0.747	-0.345246		0.75	-0.187284		0.75	-0.130355
0.748	-0.346722		0.751	-0.188411		0.751	-0.131062
0.749	-0.348041		0.752	-0.189407		0.752	-0.13172
0.75	-0.349149		0.753	-0.190292		0.753	-0.132285
0.751	-0.349983		0.754	-0.191089		0.754	-0.132742
0.752	-0.350473		0.755	-0.191799		0.755	-0.1331
0.753	-0.350559		0.756	-0.192437		0.756	-0.133357
0.754	-0.350219		0.757	-0.19301		0.757	-0.133503
0.755	-0.349477		0.758	-0.19346		0.758	-0.133554
0.756	-0.348358		0.759	-0.19374		0.759	-0.133551
0.757	-0.346853		0.76	-0.193866		0.76	-0.133532
0.758	-0.344954		0.761	-0.193854		0.761	-0.133511
0.759	-0.342708		0.762	-0.193693		0.762	-0.133468
0.76	-0.340198		0.763	-0.193372		0.763	-0.133365
0.761	-0.337525		0.764	-0.192889		0.764	-0.133184
0.762	-0.334789		0.765	-0.192259		0.765	-0.13295
0.763	-0.332021		0.766	-0.191509		0.766	-0.132691
0.764	-0.329202		0.767	-0.190659		0.767	-0.13244
0.765	-0.326338		0.768	-0.189731		0.768	-0.132218
0.766	-0.323434		0.769	-0.188729		0.769	-0.13202
0.767	-0.320473		0.77	-0.187646		0.77	-0.131815
0.768	-0.317471		0.771	-0.186502		0.771	-0.131583
0.769	-0.314482		0.772	-0.185323		0.772	-0.131327
0.77	-0.311545		0.773	-0.184061		0.773	-0.131071
0.771	-0.308707		0.774	-0.182616		0.774	-0.130846
0.772	-0.305996		0.775	-0.180972		0.775	-0.130676
0.773	-0.30337		0.776	-0.179218		0.776	-0.130575
0.774	-0.300776		0.777	-0.177462		0.777	-0.130518
0.775	-0.29823		0.778	-0.175746		0.778	-0.130438
0.776	-0.295803		0.779	-0.174035		0.779	-0.130293
0.777	-0.293584		0.78	-0.17229		0.78	-0.130072
0.778	-0.29165		0.781	-0.170508		0.781	-0.129763
0.779	-0.290027		0.782	-0.168717		0.782	-0.12937
0.78	-0.288701		0.783	-0.166967		0.783	-0.128955
0.781	-0.287644		0.784	-0.165286		0.784	-0.128611
0.782	-0.286825		0.785	-0.163682		0.785	-0.128392
0.783	-0.286204		0.786	-0.1622		0.786	-0.128314
0.784	-0.285703		0.787	-0.160883		0.787	-0.128367
0.785	-0.285221		0.788	-0.159753		0.788	-0.128525
0.786	-0.284712		0.789	-0.158814		0.789	-0.128759
0.787	-0.284198		0.79	-0.158076		0.79	-0.129052
0.788	-0.283736		0.791	-0.157566		0.791	-0.129387
0.789	-0.28337		0.792	-0.157289		0.792	-0.129732
0.79	-0.283092		0.793	-0.157237		0.793	-0.130058
0.791	-0.282884		0.794	-0.157412		0.794	-0.130369
0.792	-0.282776		0.795	-0.157778		0.795	-0.130705
0.793	-0.282796		0.796	-0.158276		0.796	-0.131061
0.794	-0.282899		0.797	-0.158877		0.797	-0.131396
0.795	-0.283035		0.798	-0.159573		0.798	-0.131689
0.796	-0.283196		0.799	-0.160332		0.799	-0.13196
0.797	-0.283348		0.8	-0.161083		0.8	-0.132254
0.798	-0.283451		0.801	-0.161743		0.801	-0.132609
0.799	-0.283544		0.802	-0.162236		0.802	-0.133017
0.8	-0.283673		0.803	-0.162536		0.803	-0.133454
0.801	-0.283815		0.804	-0.162675		0.804	-0.133916
0.802	-0.283943		0.805	-0.162684		0.805	-0.134399
0.803	-0.284033		0.806	-0.162549		0.806	-0.134869
0.804	-0.284035		0.807	-0.162267		0.807	-0.135251
0.805	-0.283892		0.808	-0.161876		0.808	-0.135471
0.806	-0.283562		0.809	-0.161401		0.809	-0.135512
0.807	-0.283014		0.81	-0.160828		0.81	-0.135406
0.808	-0.282198		0.811	-0.160143		0.811	-0.135175
0.809	-0.280998		0.812	-0.159386		0.812	-0.134828
0.81	-0.27928		0.813	-0.15862		0.813	-0.134391
0.811	-0.277029		0.814	-0.157857		0.814	-0.133907
0.812	-0.274368		0.815	-0.157065		0.815	-0.133411
0.813	-0.271431		0.816	-0.156215		0.816	-0.132938
0.814	-0.268305		0.817	-0.155301		0.817	-0.132505
0.815	-0.265092		0.818	-0.154339		0.818	-0.132089
0.816	-0.261933		0.819	-0.153306		0.819	-0.131675
0.817	-0.258918		0.82	-0.152121		0.82	-0.131283
0.818	-0.256059		0.821	-0.150732		0.821	-0.130929
0.819	-0.253331		0.822	-0.149169		0.822	-0.13061
0.82	-0.250684		0.823	-0.147467		0.823	-0.130325
0.821	-0.248107		0.824	-0.145602		0.824	-0.130067
0.822	-0.245685		0.825	-0.143531		0.825	-0.129817
0.823	-0.243482		0.826	-0.141265		0.826	-0.129559
0.824	-0.241482		0.827	-0.138852		0.827	-0.129303
0.825	-0.239679		0.828	-0.136354		0.828	-0.129048
0.826	-0.238083		0.829	-0.133816		0.829	-0.128774
0.827	-0.236652		0.83	-0.131252		0.83	-0.128489
0.828	-0.235368		0.831	-0.128644		0.831	-0.128216
0.829	-0.234278		0.832	-0.125971		0.832	-0.127943
0.83	-0.233389		0.833	-0.123286		0.833	-0.127646
0.831	-0.232649		0.834	-0.120718		0.834	-0.127322
0.832	-0.232031		0.835	-0.118366		0.835	-0.12698
0.833	-0.231517		0.836	-0.11628		0.836	-0.126648
0.834	-0.231069		0.837	-0.114497		0.837	-0.126382
0.835	-0.230634		0.838	-0.113024		0.838	-0.126238
0.836	-0.23017		0.839	-0.111844		0.839	-0.126241
0.837	-0.229673		0.84	-0.110971		0.84	-0.126356
0.838	-0.229236		0.841	-0.110433		0.841	-0.126528
0.839	-0.229027		0.842	-0.110229		0.842	-0.126726
0.84	-0.229148		0.843	-0.110331		0.843	-0.126948
0.841	-0.229589		0.844	-0.110704		0.844	-0.127204
0.842	-0.23029		0.845	-0.111316		0.845	-0.127513
0.843	-0.23117		0.846	-0.112122		0.846	-0.127874
0.844	-0.232172		0.847	-0.113073		0.847	-0.128239
0.845	-0.233266		0.848	-0.114146		0.848	-0.128558
0.846	-0.234393		0.849	-0.11535		0.849	-0.128821
0.847	-0.2355		0.85	-0.116653		0.85	-0.129062
0.848	-0.236603		0.851	-0.118023		0.851	-0.12932
0.849	-0.237731		0.852	-0.119462		0.852	-0.129622
0.85	-0.238893		0.853	-0.120929		0.853	-0.129957
0.851	-0.240091		0.854	-0.122345		0.854	-0.130277
0.852	-0.24126		0.855	-0.123657		0.855	-0.130546
0.853	-0.242248		0.856	-0.124842		0.856	-0.130787
0.854	-0.242921		0.857	-0.125906		0.857	-0.131027
0.855	-0.243222		0.858	-0.126877		0.858	-0.131256
0.856	-0.243142		0.859	-0.127786		0.859	-0.131452
0.857	-0.242723		0.86	-0.12864		0.86	-0.131605
0.858	-0.242037		0.861	-0.129369		0.861	-0.131738
0.859	-0.241164		0.862	-0.129887		0.862	-0.1319
0.86	-0.24016		0.863	-0.130207		0.863	-0.132128
0.861	-0.239007		0.864	-0.130387		0.864	-0.132419
0.862	-0.237681		0.865	-0.130433		0.865	-0.132747
0.863	-0.236208		0.866	-0.130321		0.866	-0.133078
0.864	-0.234616		0.867	-0.130032		0.867	-0.133386
0.865	-0.232916		0.868	-0.129565		0.868	-0.133635
0.866	-0.231108		0.869	-0.128969		0.869	-0.133797
0.867	-0.229217		0.87	-0.128322		0.87	-0.133879
0.868	-0.227276		0.871	-0.127671		0.871	-0.1339
0.869	-0.225278		0.872	-0.127023		0.872	-0.133848
0.87	-0.223206		0.873	-0.126339		0.873	-0.133707
0.871	-0.221065		0.874	-0.125533		0.874	-0.133483
0.872	-0.218838		0.875	-0.12457		0.875	-0.133185
0.873	-0.216485		0.876	-0.12351		0.876	-0.132807
0.874	-0.214016		0.877	-0.122408		0.877	-0.132352
0.875	-0.211514		0.878	-0.121268		0.878	-0.131845
0.876	-0.209084		0.879	-0.120057		0.879	-0.131319
0.877	-0.206763		0.88	-0.118746		0.88	-0.130821
0.878	-0.204517		0.881	-0.117313		0.881	-0.130406
0.879	-0.20232		0.882	-0.115749		0.882	-0.130109
0.88	-0.200188		0.883	-0.114088		0.883	-0.129937
0.881	-0.198163		0.884	-0.112411		0.884	-0.129883
0.882	-0.196305		0.885	-0.110787		0.885	-0.129927
0.883	-0.194683		0.886	-0.109242		0.886	-0.130028
0.884	-0.193324		0.887	-0.107809		0.887	-0.130128
0.885	-0.192219		0.888	-0.106521		0.888	-0.130171
0.886	-0.191316		0.889	-0.105362		0.889	-0.130141
0.887	-0.190508		0.89	-0.104322		0.89	-0.130074
0.888	-0.189755		0.891	-0.103457		0.891	-0.130025
0.889	-0.189111		0.892	-0.10285		0.892	-0.130036
0.89	-0.188603		0.893	-0.102536		0.893	-0.130132
0.891	-0.188202		0.894	-0.102483		0.894	-0.130311
0.892	-0.187907		0.895	-0.102651		0.895	-0.130547
0.893	-0.187762		0.896	-0.103025		0.896	-0.130805
0.894	-0.187834		0.897	-0.103584		0.897	-0.131066
0.895	-0.188193		0.898	-0.104275		0.898	-0.131319
0.896	-0.188873		0.899	-0.105036		0.899	-0.131548
0.897	-0.189859		0.9	-0.105844		0.9	-0.131762
0.898	-0.191105		0.901	-0.106683		0.901	-0.131994
0.899	-0.192533		0.902	-0.107491		0.902	-0.13225
0.9	-0.19403		0.903	-0.108191		0.903	-0.132499
0.901	-0.195522		0.904	-0.108746		0.904	-0.132707
0.902	-0.197001		0.905	-0.109173		0.905	-0.132846
0.903	-0.198441		0.906	-0.109499		0.906	-0.132884
0.904	-0.199755		0.907	-0.109743		0.907	-0.132808
0.905	-0.200899		0.908	-0.109942		0.908	-0.132635
0.906	-0.201927		0.909	-0.110128		0.909	-0.132385
0.907	-0.202908		0.91	-0.110281		0.91	-0.132082
0.908	-0.203823		0.911	-0.110383		0.911	-0.131738
0.909	-0.204595		0.912	-0.110442		0.912	-0.131356
0.91	-0.20516		0.913	-0.11046		0.913	-0.130943
0.911	-0.205456		0.914	-0.110421		0.914	-0.130533
0.912	-0.205428		0.915	-0.110296		0.915	-0.13016
0.913	-0.205078		0.916	-0.110051		0.916	-0.12986
0.914	-0.204453		0.917	-0.10967		0.917	-0.129658
0.915	-0.203622		0.918	-0.109138		0.918	-0.12955
0.916	-0.202676		0.919	-0.108444		0.919	-0.129507
0.917	-0.201655		0.92	-0.107593		0.92	-0.129485
0.918	-0.200523		0.921	-0.106613		0.921	-0.129438
0.919	-0.199284		0.922	-0.105531		0.922	-0.129363
0.92	-0.197974		0.923	-0.104342		0.923	-0.129285
0.921	-0.196586		0.924	-0.103004		0.924	-0.129212
0.922	-0.195138		0.925	-0.101477		0.925	-0.12913
0.923	-0.193665		0.926	-0.0997768		0.926	-0.12903
0.924	-0.192131		0.927	-0.0979778		0.927	-0.128928
0.925	-0.190495		0.928	-0.0961113		0.928	-0.128853
0.926	-0.188798		0.929	-0.0941615		0.929	-0.128829
0.927	-0.187148		0.93	-0.0921683		0.93	-0.12886
0.928	-0.185654		0.931	-0.0902143		0.931	-0.128935
0.929	-0.184402		0.932	-0.0883455		0.932	-0.129054
0.93	-0.183477		0.933	-0.0865724		0.933	-0.129226
0.931	-0.18296		0.934	-0.0848996		0.934	-0.129442
0.932	-0.18291		0.935	-0.0833353		0.935	-0.129681
0.933	-0.183339		0.936	-0.0818907		0.936	-0.129939
0.934	-0.184245		0.937	-0.0805616		0.937	-0.13021
0.935	-0.185611		0.938	-0.0793503		0.938	-0.130485
0.936	-0.187348		0.939	-0.0782897		0.939	-0.130763
0.937	-0.189331		0.94	-0.0774027		0.94	-0.131041
0.938	-0.191435		0.941	-0.0767059		0.941	-0.131308
0.939	-0.193515		0.942	-0.0762351		0.942	-0.131568
0.94	-0.195454		0.943	-0.0760133		0.943	-0.131834
0.941	-0.197171		0.944	-0.0760378		0.944	-0.132107
0.942	-0.19856		0.945	-0.0763147		0.945	-0.132354
0.943	-0.19953		0.946	-0.0768605		0.946	-0.132529
0.944	-0.200045		0.947	-0.0776595		0.947	-0.132618
0.945	-0.200098		0.948	-0.0786599		0.948	-0.132637
0.946	-0.199743		0.949	-0.0798064		0.949	-0.132606
0.947	-0.19909		0.95	-0.0810597		0.95	-0.132545
0.948	-0.198193		0.951	-0.0824048		0.951	-0.132491
0.949	-0.197029		0.952	-0.0838573		0.952	-0.132474
0.95	-0.195542		0.953	-0.0854312		0.953	-0.132497
0.951	-0.193676		0.954	-0.0870983		0.954	-0.13254
0.952	-0.191433		0.955	-0.0888028		0.955	-0.132586
0.953	-0.188889		0.956	-0.0905049		0.956	-0.132641
0.954	-0.186173		0.957	-0.0922005		0.957	-0.13271
0.955	-0.183396		0.958	-0.0938732		0.958	-0.132775
0.956	-0.180644		0.959	-0.0954416		0.959	-0.132835
0.957	-0.178024		0.96	-0.0968075		0.96	-0.132916
0.958	-0.175667		0.961	-0.0979085		0.961	-0.133022
0.959	-0.173741		0.962	-0.098702		0.962	-0.133135
0.96	-0.172421		0.963	-0.0991612		0.963	-0.133228
0.961	-0.171826		0.964	-0.0992501		0.964	-0.133262
0.962	-0.171997		0.965	-0.0988406		0.965	-0.133199
0.963	-0.172803		0.966	-0.0976746		0.966	-0.133027
0.964	-0.173862		0.967	-0.0954164		0.967	-0.132746
0.965	-0.17463		0.968	-0.0917388		0.968	-0.132378
0.966	-0.174579		0.969	-0.0864048		0.969	-0.131957
0.967	-0.173275		0.97	-0.0793262		0.97	-0.131518
0.968	-0.17037		0.971	-0.0705808		0.971	-0.131089
0.969	-0.165592		0.972	-0.0603793		0.972	-0.13069
0.97	-0.158815		0.973	-0.0490116		0.973	-0.130315
0.971	-0.15015		0.974	-0.0368216		0.974	-0.129939
0.972	-0.139911		0.975	-0.0241924		0.975	-0.129543
0.973	-0.128458		0.976	-0.0115086		0.976	-0.129122
0.974	-0.116112		0.977	0.000852565		0.977	-0.128659
0.975	-0.103239		0.978	0.0125266		0.978	-0.128147
0.976	-0.0902606		0.979	0.0231887		0.979	-0.127613
0.977	-0.0775669		0.98	0.0325454		0.98	-0.127086
0.978	-0.0654585		0.981	0.0403477		0.981	-0.126561
0.979	-0.0541709		0.982	0.0464247		0.982	-0.126049
0.98	-0.043913		0.983	0.050678		0.983	-0.12561
0.981	-0.034812		0.984	0.0530944		0.984	-0.125309
0.982	-0.0268548		0.985	0.0537252		0.985	-0.125163
0.983	-0.0199632		0.986	0.0526364		0.986	-0.125161
0.984	-0.0140874		0.987	0.0499587		0.987	-0.125289
0.985	-0.00917419		0.988	0.0459231		0.988	-0.125521
0.986	-0.00507723		0.989	0.0408003		0.989	-0.12582
0.987	-0.00157178		0.99	0.0348734		0.99	-0.126164
0.988	0.00155558		0.991	0.0284457		0.991	-0.126527
0.989	0.00448037		0.992	0.0218161		0.992	-0.126863
0.99	0.00733484		0.993	0.0152483		0.993	-0.127143
0.991	0.0101926		0.994	0.00896203		0.994	-0.127376
0.992	0.0131099		0.995	0.00313185		0.995	-0.127578
0.993	0.0161564		0.996	-0.002101		0.996	-0.127756
0.994	0.0193841		0.997	-0.00660426		0.997	-0.127898
0.995	0.0228021		0.998	-0.0102619		0.998	-0.128005
0.996	0.0263937		0.999	-0.0130025		0.999	-0.128087
0.997	0.0301461		1	-0.0147956		1	-0.128144
0.998	0.034024		1.001	-0.015624		1.001	-0.128193
0.999	0.0379524		1.002	-0.0154668		1.002	-0.128254
1	0.0418482		1.003	-0.0142891		1.003	-0.128304
1.001	0.0456228		1.004	-0.0120414		1.004	-0.128309
1.002	0.0491926		1.005	-0.00870064		1.005	-0.128276
1.003	0.0524869		1.006	-0.00433869		1.006	-0.128251
1.004	0.0554019		1.007	0.000863026		1.007	-0.128252
1.005	0.0578022		1.008	0.00669924		1.008	-0.128239
1.006	0.0595954		1.009	0.0130169		1.009	-0.128162
1.007	0.0607424		1.01	0.0196986		1.01	-0.128
1.008	0.0612023		1.011	0.0266209		1.011	-0.127744
1.009	0.0609041		1.012	0.033635		1.012	-0.127399
1.01	0.0597874		1.013	0.040587		1.013	-0.126998
1.011	0.0578636		1.014	0.0473214		1.014	-0.126582
1.012	0.0551626		1.015	0.0536795		1.015	-0.12617
1.013	0.0516611		1.016	0.0595545		1.016	-0.125771
1.014	0.0473028		1.017	0.0649044		1.017	-0.125418
1.015	0.0420475		1.018	0.069793		1.018	-0.125147
1.016	0.0359326		1.019	0.0744942		1.019	-0.12497
1.017	0.029132		1.02	0.0793765		1.02	-0.124898
1.018	0.0219586		1.021	0.0847078		1.021	-0.12494
1.019	0.0147994		1.022	0.0907052		1.022	-0.125087
1.02	0.00802825		1.023	0.0976059		1.023	-0.125328
1.021	0.00193607		1.024	0.105599		1.024	-0.125642
1.022	-0.00330387		1.025	0.114752		1.025	-0.126013
1.023	-0.00764226		1.026	0.124905		1.026	-0.12644
1.024	-0.0111479		1.027	0.135519		1.027	-0.126931
1.025	-0.0139679		1.028	0.145645		1.028	-0.127496
1.026	-0.0162735		1.029	0.154123		1.029	-0.128154
1.027	-0.0182352		1.03	0.159847		1.03	-0.128919
1.028	-0.0200121		1.031	0.161945		1.031	-0.129834
1.029	-0.0217545		1.032	0.159846		1.032	-0.130958
1.03	-0.0236284		1.033	0.153288		1.033	-0.132345
1.031	-0.0258346		1.034	0.14233		1.034	-0.134035
1.032	-0.0285912		1.035	0.127285		1.035	-0.13606
1.033	-0.0320756		1.036	0.108635		1.036	-0.138437
1.034	-0.0363624		1.037	0.0869314		1.037	-0.141158
1.035	-0.0414487		1.038	0.0627194		1.038	-0.144205
1.036	-0.0473502		1.039	0.0365544		1.039	-0.147557
1.037	-0.0541358		1.04	0.00904097		1.04	-0.151205
1.038	-0.0618745		1.041	-0.0192088		1.041	-0.155132
1.039	-0.0705809		1.042	-0.0476349		1.042	-0.159252
1.04	-0.0802242		1.043	-0.0757166		1.043	-0.163429
1.041	-0.0907492		1.044	-0.102958		1.044	-0.167513
1.042	-0.102069		1.045	-0.128947		1.045	-0.171346
1.043	-0.114052		1.046	-0.153435		1.046	-0.174778
1.044	-0.12651		1.047	-0.176336		1.047	-0.177733
1.045	-0.139191		1.048	-0.197605		1.048	-0.180183
1.046	-0.15183		1.049	-0.217159		1.049	-0.182083
1.047	-0.164237		1.05	-0.234941		1.05	-0.183369
1.048	-0.176257		1.051	-0.250979		1.051	-0.183957
1.049	-0.187678		1.052	-0.265343		1.052	-0.183753
1.05	-0.198247		1.053	-0.278077		1.053	-0.182692
1.051	-0.207755		1.054	-0.289212		1.054	-0.180766
1.052	-0.216078		1.055	-0.298826		1.055	-0.177998
1.053	-0.223179		1.056	-0.307016		1.056	-0.17442
1.054	-0.229053		1.057	-0.313813		1.057	-0.170104
1.055	-0.233757		1.058	-0.319193		1.058	-0.165186
1.056	-0.237459		1.059	-0.323149		1.059	-0.159787
1.057	-0.240441		1.06	-0.325729		1.06	-0.15399
1.058	-0.243092		1.061	-0.326992		1.061	-0.147887
1.059	-0.24583		1.062	-0.326962		1.062	-0.141574
1.06	-0.248997		1.063	-0.325625		1.063	-0.135127
1.061	-0.252862		1.064	-0.323003		1.064	-0.128634
1.062	-0.257645		1.065	-0.319179		1.065	-0.122186
1.063	-0.263492		1.066	-0.314274		1.066	-0.115833
1.064	-0.270482		1.067	-0.308396		1.067	-0.109594
1.065	-0.278565		1.068	-0.301625		1.068	-0.10351
1.066	-0.287549		1.069	-0.294031		1.069	-0.0976678
1.067	-0.297229		1.07	-0.285692		1.07	-0.0921723
1.068	-0.307459		1.071	-0.27671		1.071	-0.0871064
1.069	-0.318003		1.072	-0.267212		1.072	-0.0825366
1.07	-0.328247		1.073	-0.257323		1.073	-0.0785362
1.071	-0.337285		1.074	-0.247149		1.074	-0.0751565
1.072	-0.344349		1.075	-0.236779		1.075	-0.0723792
1.073	-0.348947		1.076	-0.226273		1.076	-0.0701464
1.074	-0.350772		1.077	-0.215712		1.077	-0.0684191
1.075	-0.349669		1.078	-0.205208		1.078	-0.0671525
1.076	-0.345418		1.079	-0.194834		1.079	-0.0662748
1.077	-0.337611		1.08	-0.184624		1.08	-0.0657313
1.078	-0.325921		1.081	-0.174668		1.081	-0.0654927
1.079	-0.310412		1.082	-0.165102		1.082	-0.0655268
1.08	-0.291564		1.083	-0.156022		1.083	-0.0657904
1.081	-0.270153		1.084	-0.147442		1.084	-0.0662395
1.082	-0.247126		1.085	-0.139356		1.085	-0.0668259
1.083	-0.223485		1.086	-0.131771		1.086	-0.0674855
1.084	-0.200195		1.087	-0.124676		1.087	-0.0681561
1.085	-0.17808		1.088	-0.118097		1.088	-0.0688023
1.086	-0.157718		1.089	-0.112155		1.089	-0.0694268
1.087	-0.139432		1.09	-0.106981		1.09	-0.0700588
1.088	-0.123396		1.091	-0.102625		1.091	-0.0707232
1.089	-0.109739		1.092	-0.0990738		1.092	-0.0714252
1.09	-0.0984941		1.093	-0.0962939		1.093	-0.0721588
1.091	-0.0896307		1.094	-0.0942493		1.094	-0.0729275
1.092	-0.0831198		1.095	-0.0929016		1.095	-0.0737539
1.093	-0.0789094		1.096	-0.092209		1.096	-0.0746734
1.094	-0.076897		1.097	-0.0921317		1.097	-0.0757196
1.095	-0.0768942		1.098	-0.0926408		1.098	-0.0768942
1.096	-0.0786114		1.099	-0.0937469		1.099	-0.0781634
1.097	-0.0817333		1.1	-0.0954322		1.1	-0.0794959
1.098	-0.0859707		1.101	-0.0975316		1.101	-0.0808817
1.099	-0.0910389		1.102	-0.0997893		1.102	-0.0823111
1.1	-0.0966503		1.103	-0.10201		1.103	-0.0837571
1.101	-0.102592		1.104	-0.104109		1.104	-0.0851886
1.102	-0.108783		1.105	-0.106055		1.105	-0.0865693
1.103	-0.115185		1.106	-0.107766		1.106	-0.087806
1.104	-0.121687		1.107	-0.109081		1.107	-0.0887095
1.105	-0.128097		1.108	-0.109697		1.108	-0.0890177
1.106	-0.134184		1.109	-0.108926		1.109	-0.0884447
1.107	-0.139677		1.11	-0.105582		1.11	-0.0867181
1.108	-0.144255		1.111	-0.098251		1.111	-0.0836253
1.109	-0.147519		1.112	-0.0855907		1.112	-0.0790471
1.11	-0.148748		1.113	-0.0661721		1.113	-0.0729453
1.111	-0.146403		1.114	-0.0379287		1.114	-0.0653629
1.112	-0.137757		1.115	0.00212356		1.115	-0.0564544
1.113	-0.119096		1.116	0.0574342		1.116	-0.0464771
1.114	-0.0863991		1.117	0.131119		1.117	-0.0357422
1.115	-0.0361402		1.118	0.225341		1.118	-0.024572
1.116	0.0341143		1.119	0.340962		1.119	-0.0132718
1.117	0.125428		1.12	0.477453		1.12	-0.00211093
1.118	0.237491		1.121	0.633071		1.121	0.00867871
1.119	0.368793		1.122	0.805151		1.122	0.0188853
1.12	0.516898		1.123	0.990374		1.123	0.0283153
1.121	0.678732		1.124	1.18505		1.124	0.0368164
1.122	0.850856		1.125	1.38539		1.125	0.0442934
1.123	1.02973		1.126	1.58769		1.126	0.0506926
1.124	1.21183		1.127	1.78844		1.127	0.0559709
1.125	1.39382		1.128	1.98435		1.128	0.0601022
1.126	1.57257		1.129	2.17245		1.129	0.0631057
1.127	1.74531		1.13	2.35014		1.13	0.0650403
1.128	1.90966		1.131	2.5152		1.131	0.065989
1.129	2.06365		1.132	2.66589		1.132	0.0660579
1.13	2.20583		1.133	2.80088		1.133	0.0653653
1.131	2.33517		1.134	2.91915		1.134	0.0640243
1.132	2.45106		1.135	3.01998		1.135	0.0621401
1.133	2.5533		1.136	3.10291		1.136	0.0598173
1.134	2.64219		1.137	3.16781		1.137	0.0571635
1.135	2.71835		1.138	3.21491		1.138	0.0543091
1.136	2.78268		1.139	3.24473		1.139	0.0514065
1.137	2.83626		1.14	3.25807		1.14	0.0485702
1.138	2.88021		1.141	3.2561		1.141	0.0458631
1.139	2.91564		1.142	3.24019		1.142	0.0433469
1.14	2.94366		1.143	3.21173		1.143	0.0410968
1.141	2.96531		1.144	3.17214		1.144	0.0391885
1.142	2.98148		1.145	3.1228		1.145	0.0376751
1.143	2.99289		1.146	3.06501		1.146	0.0365783
1.144	3		1.147	3		1.147	0.0359198
1.145	3.00307		1.148	2.92888		1.148	0.0357335
1.146	3.00223		1.149	2.85269		1.149	0.0360499
1.147	2.99757		1.15	2.77248		1.15	0.0368821
1.148	2.98913		1.151	2.68928		1.151	0.0382055
1.149	2.97685		1.152	2.60405		1.152	0.0399333
1.15	2.96058		1.153	2.51757		1.153	0.0419342
1.151	2.94018		1.154	2.43055		1.154	0.0440908
1.152	2.91556		1.155	2.34365		1.155	0.0463206
1.153	2.88661		1.156	2.2575		1.156	0.0485431
1.154	2.85323		1.157	2.17266		1.157	0.0506582
1.155	2.81536		1.158	2.0895		1.158	0.0525728
1.156	2.77304		1.159	2.00828		1.159	0.0542363
1.157	2.72643		1.16	1.92916		1.16	0.0556301
1.158	2.67574		1.161	1.85237		1.161	0.0567091
1.159	2.62125		1.162	1.77809		1.162	0.0573719
1.16	2.56327		1.163	1.70648		1.163	0.0575225
1.161	2.50222		1.164	1.63772		1.164	0.0571339
1.162	2.43855		1.165	1.57201		1.165	0.0562387
1.163	2.37276		1.166	1.50959		1.166	0.0548796
1.164	2.30529		1.167	1.45065		1.167	0.053075
1.165	2.23657		1.168	1.39535		1.168	0.0508248
1.166	2.16704		1.169	1.34375		1.169	0.0481333
1.167	2.09714		1.17	1.29588		1.17	0.0450429
1.168	2.02722		1.171	1.25168		1.171	0.0416516
1.169	1.95762		1.172	1.21102		1.172	0.038076
1.17	1.88875		1.173	1.17366		1.173	0.0343855
1.171	1.82108		1.174	1.13935		1.174	0.0305985
1.172	1.7551		1.175	1.10784		1.175	0.026732
1.173	1.6912		1.176	1.07887		1.176	0.0228079
1.174	1.62964		1.177	1.05219		1.177	0.0188493
1.175	1.57054		1.178	1.02759		1.178	0.0148882
1.176	1.51403		1.179	1.00491		1.179	0.0109278
1.177	1.46026		1.18	0.983996		1.18	0.00693993
1.178	1.40924		1.181	0.964619		1.181	0.00290497
1.179	1.3609		1.182	0.946445		1.182	-0.00119553
1.18	1.31516		1.183	0.929119		1.183	-0.00537434
1.181	1.27194		1.184	0.912472		1.184	-0.00961596
1.182	1.23113		1.185	0.896475		1.185	-0.0138887
1.183	1.19256		1.186	0.881119		1.186	-0.0181623
1.184	1.15611		1.187	0.866394		1.187	-0.0224229
1.185	1.12166		1.188	0.852278		1.188	-0.0266631
1.186	1.08901		1.189	0.838684		1.189	-0.0308455
1.187	1.05795		1.19	0.825437		1.19	-0.034916
1.188	1.02823		1.191	0.812317		1.191	-0.0388525
1.189	0.999647		1.192	0.79914		1.192	-0.0426584
1.19	0.972003		1.193	0.785837		1.193	-0.046328
1.191	0.945085		1.194	0.772438		1.194	-0.0498333
1.192	0.918665		1.195	0.759019		1.195	-0.0531277
1.193	0.892592		1.196	0.745671		1.196	-0.056187
1.194	0.866862		1.197	0.732476		1.197	-0.0590254
1.195	0.841539		1.198	0.719531		1.198	-0.0616538
1.196	0.816675		1.199	0.70694		1.199	-0.0640821
1.197	0.792369		1.2	0.694774		1.2	-0.0663575
1.198	0.768823		1.201	0.683122		1.201	-0.0685405
1.199	0.746289		1.202	0.672083		1.202	-0.0706591
1.2	0.724929		1.203	0.661712		1.203	-0.0727164
1.201	0.704753		1.204	0.65203		1.204	-0.0747012
1.202	0.685727		1.205	0.643058		1.205	-0.0765665
1.203	0.667878		1.206	0.634787		1.206	-0.078256
1.204	0.651252		1.207	0.627193		1.207	-0.0797593
1.205	0.635895		1.208	0.620238		1.208	-0.0810846
1.206	0.621844		1.209	0.61382		1.209	-0.0822125
1.207	0.609132		1.21	0.607804		1.21	-0.0831114
1.208	0.597753		1.211	0.60212		1.211	-0.0837702
1.209	0.587604		1.212	0.596795		1.212	-0.0842224
1.21	0.578488		1.213	0.591892		1.213	-0.0845347
1.211	0.57019		1.214	0.587434		1.214	-0.0847563
1.212	0.562505		1.215	0.583385		1.215	-0.0848947
1.213	0.555269		1.216	0.579706		1.216	-0.0849418
1.214	0.548381		1.217	0.576402		1.217	-0.0848979
1.215	0.54177		1.218	0.57346		1.218	-0.0847669
1.216	0.535365		1.219	0.570831		1.219	-0.0845516
1.217	0.529131		1.22	0.568491		1.22	-0.0842698
1.218	0.523096		1.221	0.566423		1.221	-0.0839604
1.219	0.51729		1.222	0.564577		1.222	-0.0836685
1.22	0.511688		1.223	0.562861		1.223	-0.0834416
1.221	0.50624		1.224	0.561189		1.224	-0.0833118
1.222	0.500896		1.225	0.559494		1.225	-0.0832669
1.223	0.495616		1.226	0.55771		1.226	-0.0832904
1.224	0.490405		1.227	0.555798		1.227	-0.0834151
1.225	0.485269		1.228	0.553752		1.228	-0.0836813
1.226	0.480216		1.229	0.551595		1.229	-0.0840802
1.227	0.475271		1.23	0.549351		1.23	-0.0845855
1.228	0.470443		1.231	0.547021		1.231	-0.0851943
1.229	0.465742		1.232	0.544592		1.232	-0.0859125
1.23	0.461211		1.233	0.542047		1.233	-0.0867364
1.231	0.456893		1.234	0.539351		1.234	-0.0876629
1.232	0.452807		1.235	0.536476		1.235	-0.0887045
1.233	0.44896		1.236	0.533421		1.236	-0.0898826
1.234	0.445344		1.237	0.530193		1.237	-0.0912092
1.235	0.441937		1.238	0.526805		1.238	-0.0926863
1.236	0.438705		1.239	0.523271		1.239	-0.0943014
1.237	0.435611		1.24	0.519583		1.24	-0.0960067
1.238	0.432604		1.241	0.515734		1.241	-0.0977256
1.239	0.429597		1.242	0.511733		1.242	-0.0993986
1.24	0.426479		1.243	0.50761		1.243	-0.101022
1.241	0.423166		1.244	0.503456		1.244	-0.10264
1.242	0.419639		1.245	0.499376		1.245	-0.10429
1.243	0.415911		1.246	0.495405		1.246	-0.105969
1.244	0.412015		1.247	0.491498		1.247	-0.10766
1.245	0.408034		1.248	0.487603		1.248	-0.109358
1.246	0.404062		1.249	0.483745		1.249	-0.111049
1.247	0.400118		1.25	0.479986		1.25	-0.112699
1.248	0.396133		1.251	0.476368		1.251	-0.114271
1.249	0.392026		1.252	0.472907		1.252	-0.115731
1.25	0.387737		1.253	0.469577		1.253	-0.117053
1.251	0.383221		1.254	0.466316		1.254	-0.118214
1.252	0.378459		1.255	0.463082		1.255	-0.119204
1.253	0.37348		1.256	0.459863		1.256	-0.120028
1.254	0.368369		1.257	0.456619		1.257	-0.12069
1.255	0.36323		1.258	0.453301		1.258	-0.121192
1.256	0.358147		1.259	0.449931		1.259	-0.121547
1.257	0.353184		1.26	0.446616		1.26	-0.121779
1.258	0.34837		1.261	0.443488		1.261	-0.121908
1.259	0.343672		1.262	0.440612		1.262	-0.121934
1.26	0.339047		1.263	0.437983		1.263	-0.121842
1.261	0.334512		1.264	0.435607		1.264	-0.121626
1.262	0.33011		1.265	0.433529		1.265	-0.121304
1.263	0.325829		1.266	0.431756		1.266	-0.120914
1.264	0.321641		1.267	0.430219		1.267	-0.120494
1.265	0.317564		1.268	0.42883		1.268	-0.120067
1.266	0.313644		1.269	0.42754		1.269	-0.119637
1.267	0.309901		1.27	0.42631		1.27	-0.119182
1.268	0.306301		1.271	0.425106		1.271	-0.118678
1.269	0.302784		1.272	0.42391		1.272	-0.118123
1.27	0.299337		1.273	0.422709		1.273	-0.11753
1.271	0.295985		1.274	0.421504		1.274	-0.116925
1.272	0.292691		1.275	0.420303		1.275	-0.116329
1.273	0.289383		1.276	0.419103		1.276	-0.115767
1.274	0.28603		1.277	0.417861		1.277	-0.115282
1.275	0.282651		1.278	0.416548		1.278	-0.114895
1.276	0.279312		1.279	0.415175		1.279	-0.114593
1.277	0.276109		1.28	0.413761		1.28	-0.114367
1.278	0.273116		1.281	0.412316		1.281	-0.11422
1.279	0.270361		1.282	0.410833		1.282	-0.114161
1.28	0.267835		1.283	0.409272		1.283	-0.114184
1.281	0.265529		1.284	0.407582		1.284	-0.114278
1.282	0.263471		1.285	0.405748		1.285	-0.114448
1.283	0.261669		1.286	0.4038		1.286	-0.114707
1.284	0.26007		1.287	0.401782		1.287	-0.115053
1.285	0.258594		1.288	0.399712		1.288	-0.11548
1.286	0.257176		1.289	0.397565		1.289	-0.115996
1.287	0.255801		1.29	0.39531		1.29	-0.116623
1.288	0.254455		1.291	0.392948		1.291	-0.11737
1.289	0.253088		1.292	0.390489		1.292	-0.118211
1.29	0.251698		1.293	0.387936		1.293	-0.119093
1.291	0.250344		1.294	0.385314		1.294	-0.119958
1.292	0.249071		1.295	0.382694		1.295	-0.120768
1.293	0.247894		1.296	0.380147		1.296	-0.1215
1.294	0.246823		1.297	0.377707		1.297	-0.122132
1.295	0.245851		1.298	0.375364		1.298	-0.122655
1.296	0.244961		1.299	0.37307		1.299	-0.123082
1.297	0.244165		1.3	0.370787		1.3	-0.123435
1.298	0.243504		1.301	0.368529		1.301	-0.123714
1.299	0.242999		1.302	0.366354		1.302	-0.123898
1.3	0.24259		1.303	0.364302		1.303	-0.123985
1.301	0.242175		1.304	0.36238		1.304	-0.124006
1.302	0.241684		1.305	0.360597		1.305	-0.123986
1.303	0.241104		1.306	0.358986		1.306	-0.123911
1.304	0.240498		1.307	0.357571		1.307	-0.123751
1.305	0.239954		1.308	0.356313		1.308	-0.1235
1.306	0.239506		1.309	0.355121		1.309	-0.123193
1.307	0.239116		1.31	0.353925		1.31	-0.122853
1.308	0.238758		1.311	0.352716		1.311	-0.122482
1.309	0.238456		1.312	0.351513		1.312	-0.122088
1.31	0.238244		1.313	0.350346		1.313	-0.121691
1.311	0.238138		1.314	0.34925		1.314	-0.121298
1.312	0.238162		1.315	0.348237		1.315	-0.120894
1.313	0.238392		1.316	0.34731		1.316	-0.120457
1.314	0.238914		1.317	0.346478		1.317	-0.11999
1.315	0.23971		1.318	0.345746		1.318	-0.119513
1.316	0.240687		1.319	0.345106		1.319	-0.119035
1.317	0.241773		1.32	0.344536		1.32	-0.11855
1.318	0.242921		1.321	0.343999		1.321	-0.118058
1.319	0.24404		1.322	0.343449		1.322	-0.117557
1.32	0.245024		1.323	0.342871		1.323	-0.117032
1.321	0.245845		1.324	0.342311		1.324	-0.116471
1.322	0.246518		1.325	0.34183		1.325	-0.115899
1.323	0.246985		1.326	0.341459		1.326	-0.11539
1.324	0.247115		1.327	0.341169		1.327	-0.115012
1.325	0.246802		1.328	0.340856		1.328	-0.1148
1.326	0.246049		1.329	0.340418		1.329	-0.114758
1.327	0.244948		1.33	0.33983		1.33	-0.114898
1.328	0.243593		1.331	0.33911		1.331	-0.115246
1.329	0.242075		1.332	0.338263		1.332	-0.115806
1.33	0.240485		1.333	0.337283		1.333	-0.11654
1.331	0.238853		1.334	0.336221		1.334	-0.11739
1.332	0.237181		1.335	0.335155		1.335	-0.118307
1.333	0.235504		1.336	0.334102		1.336	-0.119275
1.334	0.233831		1.337	0.333035		1.337	-0.120307
1.335	0.232138		1.338	0.331936		1.338	-0.121403
1.336	0.230439		1.339	0.33081		1.339	-0.122531
1.337	0.228802		1.34	0.329654		1.34	-0.123671
1.338	0.227274		1.341	0.328433		1.341	-0.124843
1.339	0.225837		1.342	0.327113		1.342	-0.126091
1.34	0.224454		1.343	0.325713		1.343	-0.127431
1.341	0.223085		1.344	0.324276		1.344	-0.128845
1.342	0.221678		1.345	0.322793		1.345	-0.130299
1.343	0.220218		1.346	0.321207		1.346	-0.131749
1.344	0.218762		1.347	0.319457		1.347	-0.133134
1.345	0.21741		1.348	0.317495		1.348	-0.1344
1.346	0.216197		1.349	0.315325		1.349	-0.135502
1.347	0.215074		1.35	0.313028		1.35	-0.136402
1.348	0.213964		1.351	0.310694		1.351	-0.137069
1.349	0.212769		1.352	0.308387		1.352	-0.137488
1.35	0.21141		1.353	0.30615		1.353	-0.137656
1.351	0.209886		1.354	0.304025		1.354	-0.137574
1.352	0.208266		1.355	0.302041		1.355	-0.137248
1.353	0.206616		1.356	0.30019		1.356	-0.136716
1.354	0.204953		1.357	0.298464		1.357	-0.136037
1.355	0.203261		1.358	0.296889		1.358	-0.135243
1.356	0.201536		1.359	0.295468		1.359	-0.134335
1.357	0.199793		1.36	0.294173		1.36	-0.133324
1.358	0.19805		1.361	0.293029		1.361	-0.132258
1.359	0.196346		1.362	0.292106		1.362	-0.131199
1.36	0.194727		1.363	0.291421		1.363	-0.130218
1.361	0.19318		1.364	0.290925		1.364	-0.129363
1.362	0.191676		1.365	0.290581		1.365	-0.128618
1.363	0.190228		1.366	0.290405		1.366	-0.127953
1.364	0.188855		1.367	0.290419		1.367	-0.127398
1.365	0.187544		1.368	0.29059		1.368	-0.127018
1.366	0.186307		1.369	0.290858		1.369	-0.126817
1.367	0.18529		1.37	0.291152		1.37	-0.126735
1.368	0.184789		1.371	0.291368		1.371	-0.126702
1.369	0.185097		1.372	0.291425		1.372	-0.126665
1.37	0.186348		1.373	0.291323		1.373	-0.126589
1.371	0.188493		1.374	0.291097		1.374	-0.126471
1.372	0.191342		1.375	0.290746		1.375	-0.126319
1.373	0.194591		1.376	0.29023		1.376	-0.126126
1.374	0.197932		1.377	0.289521		1.377	-0.125907
1.375	0.201167		1.378	0.28864		1.378	-0.125701
1.376	0.204164		1.379	0.287637		1.379	-0.125548
1.377	0.206794		1.38	0.286544		1.38	-0.125475
1.378	0.208921		1.381	0.285377		1.381	-0.125513
1.379	0.210425		1.382	0.284169		1.382	-0.125704
1.38	0.211251		1.383	0.282931		1.383	-0.126068
1.381	0.211424		1.384	0.281639		1.384	-0.1266
1.382	0.210945		1.385	0.280301		1.385	-0.127285
1.383	0.209805		1.386	0.278948		1.386	-0.128118
1.384	0.208051		1.387	0.277583		1.387	-0.129112
1.385	0.205776		1.388	0.276208		1.388	-0.130278
1.386	0.203123		1.389	0.274826		1.389	-0.131617
1.387	0.200242		1.39	0.273416		1.39	-0.133097
1.388	0.197246		1.391	0.271951		1.391	-0.134635
1.389	0.194221		1.392	0.270399		1.392	-0.136133
1.39	0.191192		1.393	0.268735		1.393	-0.137523
1.391	0.188169		1.394	0.26699		1.394	-0.138767
1.392	0.185221		1.395	0.265232		1.395	-0.139835
1.393	0.182453		1.396	0.263516		1.396	-0.140701
1.394	0.179966		1.397	0.261842		1.397	-0.141355
1.395	0.177849		1.398	0.260183		1.398	-0.141793
1.396	0.176099		1.399	0.258562		1.399	-0.141985
1.397	0.174661		1.4	0.257021		1.4	-0.141913
1.398	0.173511		1.401	0.255554		1.401	-0.141577
1.399	0.172608		1.402	0.254149		1.402	-0.140966
1.4	0.171894		1.403	0.252833		1.403	-0.140052
1.401	0.171328		1.404	0.251635		1.404	-0.138841
1.402	0.170854		1.405	0.250578		1.405	-0.137373
1.403	0.170416		1.406	0.249686		1.406	-0.135681
1.404	0.170019		1.407	0.248952		1.407	-0.13379
1.405	0.169738		1.408	0.24835		1.408	-0.131759
1.406	0.169634		1.409	0.247878		1.409	-0.12965
1.407	0.169731		1.41	0.247561		1.41	-0.127502
1.408	0.170064		1.411	0.247439		1.411	-0.125344
1.409	0.170645		1.412	0.247527		1.412	-0.123206
1.41	0.17144		1.413	0.247799		1.413	-0.121125
1.411	0.172375		1.414	0.248239		1.414	-0.119134
1.412	0.173386		1.415	0.248899		1.415	-0.117286
1.413	0.174506		1.416	0.249829		1.416	-0.115648
1.414	0.175822		1.417	0.251013		1.417	-0.114248
1.415	0.177348		1.418	0.252363		1.418	-0.113066
1.416	0.179003		1.419	0.25382		1.419	-0.112063
1.417	0.180675		1.42	0.255398		1.42	-0.111203
1.418	0.182295		1.421	0.257113		1.421	-0.110447
1.419	0.183872		1.422	0.258958		1.422	-0.109742
1.42	0.185465		1.423	0.260906		1.423	-0.10905
1.421	0.187132		1.424	0.262859		1.424	-0.108372
1.422	0.188866		1.425	0.264682		1.425	-0.107762
1.423	0.190549		1.426	0.266286		1.426	-0.107283
1.424	0.192024		1.427	0.267656		1.427	-0.10697
1.425	0.193224		1.428	0.268816		1.428	-0.106822
1.426	0.194143		1.429	0.269798		1.429	-0.106824
1.427	0.194709		1.43	0.270638		1.43	-0.106961
1.428	0.194816		1.431	0.271346		1.431	-0.107227
1.429	0.194438		1.432	0.271894		1.432	-0.107657
1.43	0.193635		1.433	0.272297		1.433	-0.108306
1.431	0.192507		1.434	0.272631		1.434	-0.109185
1.432	0.191195		1.435	0.272951		1.435	-0.110255
1.433	0.189881		1.436	0.273231		1.436	-0.111475
1.434	0.188678		1.437	0.273404		1.437	-0.112809
1.435	0.187583		1.438	0.273397		1.438	-0.114212
1.436	0.186563		1.439	0.273155		1.439	-0.115652
1.437	0.185621		1.44	0.272622		1.44	-0.117125
1.438	0.184767		1.441	0.271767		1.441	-0.118639
1.439	0.184022		1.442	0.270642		1.442	-0.120209
1.44	0.183438		1.443	0.269352		1.443	-0.121814
1.441	0.183067		1.444	0.267965		1.444	-0.12338
1.442	0.18293		1.445	0.26649		1.445	-0.124861
1.443	0.182999		1.446	0.264925		1.446	-0.126236
1.444	0.183236		1.447	0.263296		1.447	-0.127448
1.445	0.183615		1.448	0.261641		1.448	-0.12845
1.446	0.184098		1.449	0.259964		1.449	-0.129245
1.447	0.184615		1.45	0.258254		1.45	-0.12983
1.448	0.185113		1.451	0.256536		1.451	-0.130157
1.449	0.185611		1.452	0.254842		1.452	-0.130146
1.45	0.186177		1.453	0.253168		1.453	-0.129742
1.451	0.186839		1.454	0.2515		1.454	-0.128966
1.452	0.187568		1.455	0.249877		1.455	-0.127886
1.453	0.188319		1.456	0.248395		1.456	-0.126566
1.454	0.189067		1.457	0.247168		1.457	-0.125047
1.455	0.189842		1.458	0.246265		1.458	-0.123372
1.456	0.190693		1.459	0.245695		1.459	-0.121585
1.457	0.191635		1.46	0.245451		1.46	-0.119717
1.458	0.192684		1.461	0.245545		1.461	-0.117781
1.459	0.193889		1.462	0.246006		1.462	-0.115788
1.46	0.195281		1.463	0.246832		1.463	-0.113757
1.461	0.196849		1.464	0.247972		1.464	-0.111725
1.462	0.198578		1.465	0.249351		1.465	-0.109744
1.463	0.200487		1.466	0.250909		1.466	-0.107855
1.464	0.202584		1.467	0.252616		1.467	-0.106081
1.465	0.204831		1.468	0.254425		1.468	-0.104427
1.466	0.207156		1.469	0.25627		1.469	-0.102884
1.467	0.209481		1.47	0.25811		1.47	-0.101451
1.468	0.21176		1.471	0.259913		1.471	-0.100139
1.469	0.213996		1.472	0.261616		1.472	-0.0989621
1.47	0.216214		1.473	0.263167		1.473	-0.0979563
1.471	0.218408		1.474	0.264574		1.474	-0.0971607
1.472	0.220546		1.475	0.265858		1.475	-0.0965741
1.473	0.222609		1.476	0.267019		1.476	-0.0961629
1.474	0.224576		1.477	0.268073		1.477	-0.0959074
1.475	0.226413		1.478	0.269068		1.478	-0.0958088
1.476	0.228073		1.479	0.270031		1.479	-0.0958555
1.477	0.229552		1.48	0.270936		1.48	-0.0960013
1.478	0.230894		1.481	0.271742		1.481	-0.0961977
1.479	0.232094		1.482	0.272436		1.482	-0.0964492
1.48	0.233134		1.483	0.273029		1.483	-0.0968036
1.481	0.234041		1.484	0.273557		1.484	-0.0972812
1.482	0.23484		1.485	0.274052		1.485	-0.0978677
1.483	0.235527		1.486	0.274507		1.486	-0.098551
1.484	0.236118		1.487	0.274846		1.487	-0.099318
1.485	0.236618		1.488	0.274983		1.488	-0.100154
1.486	0.236995		1.489	0.274885		1.489	-0.101053
1.487	0.237245		1.49	0.274579		1.49	-0.10199
1.488	0.237458		1.491	0.2741		1.491	-0.102906
1.489	0.237743		1.492	0.273483		1.492	-0.103738
1.49	0.238102		1.493	0.272751		1.493	-0.104475
1.491	0.238433		1.494	0.271916		1.494	-0.105132
1.492	0.238644		1.495	0.270967		1.495	-0.105734
1.493	0.238714		1.496	0.26989		1.496	-0.106288
1.494	0.238683		1.497	0.268704		1.497	-0.106773
1.495	0.238622		1.498	0.267431		1.498	-0.107143
1.496	0.238587		1.499	0.266104		1.499	-0.107345
1.497	0.23857		1.5	0.264775		1.5	-0.107363
1.498	0.238522		1.501	0.263489		1.501	-0.107202
1.499	0.2384		1.502	0.262264		1.502	-0.106867
1.5	0.238175		1.503	0.261105		1.503	-0.106367
1.501	0.237876		1.504	0.26003		1.504	-0.105719
1.502	0.237597		1.505	0.259099		1.505	-0.104934
1.503	0.237428		1.506	0.258378		1.506	-0.104017
1.504	0.237418		1.507	0.257872		1.507	-0.102961
1.505	0.237575		1.508	0.257534		1.508	-0.101764
1.506	0.237913		1.509	0.257326		1.509	-0.100441
1.507	0.238456		1.51	0.257211		1.51	-0.0990052
1.508	0.239231		1.511	0.257143		1.511	-0.0974653
1.509	0.240261		1.512	0.257105		1.512	-0.0958243
1.51	0.241514		1.513	0.257165		1.513	-0.0941057
1.511	0.242914		1.514	0.25742		1.514	-0.0923556
1.512	0.244441		1.515	0.257897		1.515	-0.0906144
1.513	0.246109		1.516	0.258552		1.516	-0.0888978
1.514	0.247927		1.517	0.259338		1.517	-0.0872202
1.515	0.249912		1.518	0.260223		1.518	-0.0856202
1.516	0.252068		1.519	0.26121		1.519	-0.0841313
1.517	0.254366		1.52	0.262319		1.52	-0.0827636
1.518	0.256757		1.521	0.263565		1.521	-0.0815202
1.519	0.259191		1.522	0.264953		1.522	-0.0804086
1.52	0.261559		1.523	0.266437		1.523	-0.0794435
1.521	0.263727		1.524	0.267922		1.524	-0.0786409
1.522	0.26563		1.525	0.269332		1.525	-0.0780062
1.523	0.267253		1.526	0.270642		1.526	-0.0775248
1.524	0.268596		1.527	0.271838		1.527	-0.0771754
1.525	0.269655		1.528	0.27288		1.528	-0.0769423
1.526	0.27039		1.529	0.27371		1.529	-0.076814
1.527	0.270733		1.53	0.274291		1.53	-0.0768013
1.528	0.270602		1.531	0.274623		1.531	-0.0769215
1.529	0.269909		1.532	0.274722		1.532	-0.0771647
1.53	0.268561		1.533	0.274593		1.533	-0.0775239
1.531	0.266475		1.534	0.274261		1.534	-0.0780142
1.532	0.263563		1.535	0.273791		1.535	-0.0786476
1.533	0.259726		1.536	0.273252		1.536	-0.0794178
1.534	0.254942		1.537	0.272671		1.537	-0.080297
1.535	0.249321		1.538	0.272037		1.538	-0.0812409
1.536	0.243003		1.539	0.271349		1.539	-0.082226
1.537	0.236116		1.54	0.270629		1.54	-0.0832642
1.538	0.228852		1.541	0.269891		1.541	-0.0843521
1.539	0.221436		1.542	0.269161		1.542	-0.0854509
1.54	0.214055		1.543	0.268486		1.543	-0.0865111
1.541	0.206856		1.544	0.267887		1.544	-0.0874836
1.542	0.199977		1.545	0.267334		1.545	-0.088327
1.543	0.193565		1.546	0.266789		1.546	-0.0890004
1.544	0.187808		1.547	0.266235		1.547	-0.0894466
1.545	0.182873		1.548	0.265627		1.548	-0.0896139
1.546	0.178841		1.549	0.264903		1.549	-0.0894992
1.547	0.175726		1.55	0.26407		1.55	-0.0891474
1.548	0.173562		1.551	0.263166		1.551	-0.0885785
1.549	0.172429		1.552	0.262201		1.552	-0.0877614
1.55	0.172324		1.553	0.261205		1.553	-0.0866824
1.551	0.173115		1.554	0.260222		1.554	-0.0853654
1.552	0.174635		1.555	0.259287		1.555	-0.0838344
1.553	0.176745		1.556	0.258407		1.556	-0.0821192
1.554	0.179325		1.557	0.257547		1.557	-0.0802717
1.555	0.182243		1.558	0.256687		1.558	-0.0783527
1.556	0.185323		1.559	0.255868		1.559	-0.0764157
1.557	0.188361		1.56	0.255136		1.56	-0.0745058
1.558	0.19117		1.561	0.254522		1.561	-0.0726595
1.559	0.193595		1.562	0.254044		1.562	-0.0709095
1.56	0.195538		1.563	0.2537		1.563	-0.0692859
1.561	0.196939		1.564	0.253511		1.564	-0.0677974
1.562	0.19773		1.565	0.253538		1.565	-0.0664272
1.563	0.197869		1.566	0.253808		1.566	-0.065164
1.564	0.197372		1.567	0.254296		1.567	-0.0640146
1.565	0.196316		1.568	0.254971		1.568	-0.0629816
1.566	0.194853		1.569	0.255814		1.569	-0.0620555
1.567	0.193194		1.57	0.25681		1.57	-0.0612307
1.568	0.191606		1.571	0.257897		1.571	-0.0605076
1.569	0.190428		1.572	0.258976		1.572	-0.0598688
1.57	0.189968		1.573	0.260005		1.573	-0.0592814
1.571	0.190391		1.574	0.261005		1.574	-0.0587341
1.572	0.191779		1.575	0.262014		1.575	-0.0582341
1.573	0.194176		1.576	0.263047		1.576	-0.057784
1.574	0.197576		1.577	0.264066		1.577	-0.0573877
1.575	0.201899		1.578	0.265009		1.578	-0.0570517
1.576	0.206995		1.579	0.265836		1.579	-0.0567878
1.577	0.212673		1.58	0.266542		1.58	-0.0566307
1.578	0.218704		1.581	0.267147		1.581	-0.0566199
1.579	0.224878		1.582	0.267632		1.582	-0.0567634
1.58	0.231101		1.583	0.267937		1.583	-0.0570384
1.581	0.237313		1.584	0.268034		1.584	-0.057408
1.582	0.243387		1.585	0.26793		1.585	-0.0578402
1.583	0.249174		1.586	0.26765		1.586	-0.0583252
1.584	0.254584		1.587	0.267236		1.587	-0.0588602
1.585	0.259587		1.588	0.266707		1.588	-0.0594428
1.586	0.264161		1.589	0.266016		1.589	-0.0600923
1.587	0.268257		1.59	0.265094		1.59	-0.0608375
1.588	0.27184		1.591	0.263924		1.591	-0.0616655
1.589	0.274888		1.592	0.262568		1.592	-0.0625235
1.59	0.277335		1.593	0.261115		1.593	-0.0633803
1.591	0.279141		1.594	0.259639		1.594	-0.0642248
1.592	0.280372		1.595	0.258215		1.595	-0.0650394
1.593	0.28115		1.596	0.256892		1.596	-0.0658108
1.594	0.281571		1.597	0.255654		1.597	-0.0665092
1.595	0.281702		1.598	0.254452		1.598	-0.0670709
1.596	0.281607		1.599	0.253241		1.599	-0.0674424
1.597	0.281372		1.6	0.252006		1.6	-0.0676064
1.598	0.281093		1.601	0.250783		1.601	-0.067553
1.599	0.280827		1.602	0.249639		1.602	-0.0672754
1.6	0.280568		1.603	0.248623		1.603	-0.0667885
1.601	0.280289		1.604	0.247732		1.604	-0.0661197
1.602	0.279975		1.605	0.246912		1.605	-0.0652805
1.603	0.279649		1.606	0.246125		1.606	-0.0642635
1.604	0.279389		1.607	0.245375		1.607	-0.0630723
1.605	0.279232		1.608	0.244695		1.608	-0.0617224
1.606	0.279137		1.609	0.244122		1.609	-0.0602284
1.607	0.279066		1.61	0.243686		1.61	-0.0586103
1.608	0.27898		1.611	0.243389		1.611	-0.0568983
1.609	0.278828		1.612	0.243213		1.612	-0.0551366
1.61	0.278602		1.613	0.243146		1.613	-0.0533744
1.611	0.278346		1.614	0.243205		1.614	-0.0516358
1.612	0.278133		1.615	0.243426		1.615	-0.0499306
1.613	0.278051		1.616	0.243842		1.616	-0.0483078
1.614	0.278148		1.617	0.244464		1.617	-0.046834
1.615	0.27839		1.618	0.24528		1.618	-0.0455227
1.616	0.278723		1.619	0.246281		1.619	-0.0443625
1.617	0.279146		1.62	0.247458		1.62	-0.0433578
1.618	0.27968		1.621	0.248788		1.621	-0.0425104
1.619	0.280328		1.622	0.250228		1.622	-0.0418343
1.62	0.281075		1.623	0.251716		1.623	-0.0413597
1.621	0.281856		1.624	0.253168		1.624	-0.0411123
1.622	0.282528		1.625	0.254488		1.625	-0.0411258
1.623	0.282953		1.626	0.255588		1.626	-0.0414333
1.624	0.283076		1.627	0.256428		1.627	-0.042026
1.625	0.282874		1.628	0.257		1.628	-0.0428607
1.626	0.282335		1.629	0.25733		1.629	-0.0438938
1.627	0.281494		1.63	0.257452		1.63	-0.0450695
1.628	0.280445		1.631	0.257369		1.631	-0.046311
1.629	0.279315		1.632	0.257071		1.632	-0.0475513
1.63	0.278175		1.633	0.256587		1.633	-0.0487529
1.631	0.277005		1.634	0.255978		1.634	-0.0499015
1.632	0.275771		1.635	0.255291		1.635	-0.0509945
1.633	0.274479		1.636	0.254534		1.636	-0.0520361
1.634	0.273179		1.637	0.253688		1.637	-0.0530414
1.635	0.271926		1.638	0.252747		1.638	-0.0540279
1.636	0.270733		1.639	0.251715		1.639	-0.0549897
1.637	0.269602		1.64	0.25062		1.64	-0.0559019
1.638	0.26858		1.641	0.249535		1.641	-0.0567603
1.639	0.267731		1.642	0.248568		1.642	-0.0575726
1.64	0.267106		1.643	0.24776		1.643	-0.0583066
1.641	0.266691		1.644	0.247059		1.644	-0.0589084
1.642	0.26638		1.645	0.246399		1.645	-0.059363
1.643	0.266016		1.646	0.245758		1.646	-0.0596899
1.644	0.265499		1.647	0.245144		1.647	-0.0599061
1.645	0.26485		1.648	0.244555		1.648	-0.0600184
1.646	0.264106		1.649	0.243957		1.649	-0.0600323
1.647	0.263261		1.65	0.243317		1.65	-0.0599553
1.648	0.262325		1.651	0.242608		1.651	-0.0597945
1.649	0.261296		1.652	0.241777		1.652	-0.0595398
1.65	0.260159		1.653	0.240774		1.653	-0.0591529
1.651	0.258951		1.654	0.239617		1.654	-0.0585991
1.652	0.257765		1.655	0.2384		1.655	-0.0578788
1.653	0.256735		1.656	0.237233		1.656	-0.0570057
1.654	0.255963		1.657	0.236144		1.657	-0.055977
1.655	0.255475		1.658	0.235081		1.658	-0.0547827
1.656	0.255291		1.659	0.234007		1.659	-0.0534359
1.657	0.255447		1.66	0.232946		1.66	-0.0519819
1.658	0.255995		1.661	0.23194		1.661	-0.0504822
1.659	0.256978		1.662	0.231029		1.662	-0.0489906
1.66	0.258382		1.663	0.230242		1.663	-0.0475379
1.661	0.26018		1.664	0.229614		1.664	-0.0461419
1.662	0.262358		1.665	0.229175		1.665	-0.0448375
1.663	0.264843		1.666	0.228911		1.666	-0.0436614
1.664	0.267494		1.667	0.228814		1.667	-0.0426193
1.665	0.270189		1.668	0.228926		1.668	-0.0416974
1.666	0.272833		1.669	0.229277		1.669	-0.0408784
1.667	0.275271		1.67	0.229838		1.67	-0.0401536
1.668	0.277327		1.671	0.230552		1.671	-0.0395346
1.669	0.278895		1.672	0.231349		1.672	-0.0390437
1.67	0.279955		1.673	0.232168		1.673	-0.0387087
1.671	0.280532		1.674	0.232954		1.674	-0.0385488
1.672	0.28071		1.675	0.233661		1.675	-0.0385495
1.673	0.2806		1.676	0.234259		1.676	-0.0386776
1.674	0.280278		1.677	0.234725		1.677	-0.0389219
1.675	0.2798		1.678	0.235061		1.678	-0.039299
1.676	0.279222		1.679	0.235274		1.679	-0.0398205
1.677	0.278565		1.68	0.235378		1.68	-0.0404699
1.678	0.277795		1.681	0.235407		1.681	-0.0412116
1.679	0.276895		1.682	0.235379		1.682	-0.0420119
1.68	0.275909		1.683	0.23526		1.683	-0.0428533
1.681	0.274901		1.684	0.235017		1.684	-0.0437283
1.682	0.273918		1.685	0.234689		1.685	-0.0446242
1.683	0.273005		1.686	0.234339		1.686	-0.0455366
1.684	0.272195		1.687	0.233957		1.687	-0.0464808
1.685	0.271521		1.688	0.233479		1.688	-0.0474607
1.686	0.271001		1.689	0.232867		1.689	-0.0484469
1.687	0.2706		1.69	0.232107		1.69	-0.0494034
1.688	0.270244		1.691	0.23119		1.691	-0.0503144
1.689	0.269911		1.692	0.230113		1.692	-0.0511681
1.69	0.269654		1.693	0.228872		1.693	-0.0519472
1.691	0.269498		1.694	0.227471		1.694	-0.0526322
1.692	0.269359		1.695	0.22597		1.695	-0.0532017
1.693	0.269103		1.696	0.224456		1.696	-0.0536441
1.694	0.268601		1.697	0.222978		1.697	-0.0539716
1.695	0.267747		1.698	0.221544		1.698	-0.0542058
1.696	0.266527		1.699	0.220166		1.699	-0.0543638
1.697	0.265028		1.7	0.218864		1.7	-0.0544466
1.698	0.263311		1.701	0.217656		1.701	-0.0544183
1.699	0.261366		1.702	0.216575		1.702	-0.0542299
1.7	0.259178		1.703	0.215672		1.703	-0.0538628
1.701	0.256767		1.704	0.215019		1.704	-0.0533301
1.702	0.254184		1.705	0.214659		1.705	-0.052653
1.703	0.251502		1.706	0.214534		1.706	-0.051848
1.704	0.248806		1.707	0.214524		1.707	-0.0509258
1.705	0.246182		1.708	0.214543		1.708	-0.0498842
1.706	0.243708		1.709	0.214559		1.709	-0.0487091
1.707	0.241418		1.71	0.214576		1.71	-0.0473962
1.708	0.239339		1.711	0.214621		1.711	-0.0459504
1.709	0.237537		1.712	0.214729		1.712	-0.0443819
1.71	0.236129		1.713	0.214939		1.713	-0.0427167
1.711	0.235215		1.714	0.21526		1.714	-0.0409975
1.712	0.234777		1.715	0.215676		1.715	-0.0392909
1.713	0.234707		1.716	0.216189		1.716	-0.0376757
1.714	0.234917		1.717	0.216792		1.717	-0.0361971
1.715	0.235373		1.718	0.217435		1.718	-0.034869
1.716	0.236052		1.719	0.218046		1.719	-0.0337043
1.717	0.236937		1.72	0.218592		1.72	-0.0327144
1.718	0.238026		1.721	0.219075		1.721	-0.0319234
1.719	0.2393		1.722	0.219494		1.722	-0.0313749
1.72	0.240717		1.723	0.219826		1.723	-0.0310853
1.721	0.242212		1.724	0.220056		1.724	-0.0310265
1.722	0.243696		1.725	0.220193		1.725	-0.0311626
1.723	0.245081		1.726	0.220254		1.726	-0.0314709
1.724	0.246347		1.727	0.220232		1.727	-0.0319251
1.725	0.24752		1.728	0.220079		1.728	-0.0324769
1.726	0.248586		1.729	0.21973		1.729	-0.0330738
1.727	0.249528		1.73	0.219164		1.73	-0.0337089
1.728	0.250318		1.731	0.218411		1.731	-0.0344232
1.729	0.250894		1.732	0.217514		1.732	-0.035257
1.73	0.251239		1.733	0.216491		1.733	-0.0362291
1.731	0.2514		1.734	0.215326		1.734	-0.0373525
1.732	0.251394		1.735	0.214002		1.735	-0.0386304
1.733	0.25118		1.736	0.212556		1.736	-0.0400426
1.734	0.250741		1.737	0.211038		1.737	-0.0415645
1.735	0.250089		1.738	0.209463		1.738	-0.0431634
1.736	0.249248		1.739	0.207802		1.739	-0.0447816
1.737	0.248279		1.74	0.20603		1.74	-0.0463718
1.738	0.247283		1.741	0.204159		1.741	-0.0479096
1.739	0.246333		1.742	0.202249		1.742	-0.0493565
1.74	0.245419		1.743	0.200363		1.743	-0.050676
1.741	0.244476		1.744	0.198526		1.744	-0.0518599
1.742	0.243445		1.745	0.196746		1.745	-0.0528963
1.743	0.242248		1.746	0.195023		1.746	-0.0537575
1.744	0.240797		1.747	0.193338		1.747	-0.0544258
1.745	0.239108		1.748	0.191686		1.748	-0.0548964
1.746	0.237296		1.749	0.190092		1.749	-0.0551663
1.747	0.235462		1.75	0.188559		1.75	-0.0552488
1.748	0.233687		1.751	0.187042		1.751	-0.055187
1.749	0.231977		1.752	0.185519		1.752	-0.05502
1.75	0.230283		1.753	0.184007		1.753	-0.0547314
1.751	0.228617		1.754	0.182529		1.754	-0.0542579
1.752	0.227078		1.755	0.181121		1.755	-0.0535586
1.753	0.225783		1.756	0.179864		1.756	-0.0526541
1.754	0.224857		1.757	0.178839		1.757	-0.0515875
1.755	0.224385		1.758	0.178091		1.758	-0.0503876
1.756	0.224367		1.759	0.177662		1.759	-0.0490883
1.757	0.224731		1.76	0.177607		1.76	-0.0477489
1.758	0.225372		1.761	0.177967		1.761	-0.0464117
1.759	0.226188		1.762	0.178743		1.762	-0.0450696
1.76	0.227122		1.763	0.179885		1.763	-0.0437182
1.761	0.228127		1.764	0.18131		1.764	-0.0423866
1.762	0.229145		1.765	0.182943		1.765	-0.0411013
1.763	0.230141		1.766	0.184734		1.766	-0.0398858
1.764	0.231105		1.767	0.186628		1.767	-0.0387848
1.765	0.23206		1.768	0.188551		1.768	-0.0378565
1.766	0.233061		1.769	0.190427		1.769	-0.0371459
1.767	0.234109		1.77	0.192183		1.77	-0.0366658
1.768	0.235109		1.771	0.193736		1.771	-0.0364049
1.769	0.235975		1.772	0.194991		1.772	-0.0363391
1.77	0.236699		1.773	0.195893		1.773	-0.0364565
1.771	0.237316		1.774	0.196463		1.774	-0.0367593
1.772	0.237861		1.775	0.196739		1.775	-0.0372234
1.773	0.238346		1.776	0.196723		1.776	-0.0378127
1.774	0.238734		1.777	0.196417		1.777	-0.0385019
1.775	0.238974		1.778	0.195853		1.778	-0.0392713
1.776	0.239032		1.779	0.195089		1.779	-0.0401313
1.777	0.238939		1.78	0.194225		1.78	-0.0411169
1.778	0.238793		1.781	0.193363		1.781	-0.0422311
1.779	0.238645		1.782	0.192538		1.782	-0.0434388
1.78	0.23846		1.783	0.191727		1.783	-0.0447081
1.781	0.238189		1.784	0.190884		1.784	-0.0460422
1.782	0.237847		1.785	0.189967		1.785	-0.0474769
1.783	0.237461		1.786	0.188967		1.786	-0.0490291
1.784	0.236961		1.787	0.187897		1.787	-0.0506748
1.785	0.236209		1.788	0.186753		1.788	-0.0523747
1.786	0.23513		1.789	0.185497		1.789	-0.0540665
1.787	0.233748		1.79	0.184085		1.79	-0.0556581
1.788	0.232112		1.791	0.182482		1.791	-0.0570521
1.789	0.230256		1.792	0.180671		1.792	-0.0581503
1.79	0.228235		1.793	0.178695		1.793	-0.058878
1.791	0.226163		1.794	0.176635		1.794	-0.0592258
1.792	0.224165		1.795	0.174558		1.795	-0.0592272
1.793	0.222308		1.796	0.172478		1.796	-0.0589133
1.794	0.220568		1.797	0.170379		1.797	-0.0583122
1.795	0.218842		1.798	0.168275		1.798	-0.0574629
1.796	0.217075		1.799	0.166187		1.799	-0.0564135
1.797	0.215345		1.8	0.164116		1.8	-0.0552168
1.798	0.213761		1.801	0.162107		1.801	-0.0539115
1.799	0.212334		1.802	0.160267		1.802	-0.0524851
1.8	0.211013		1.803	0.15867		1.803	-0.0508831
1.801	0.209739		1.804	0.157339		1.804	-0.0490729
1.802	0.208474		1.805	0.15627		1.805	-0.0470681
1.803	0.207225		1.806	0.155449		1.806	-0.0448887
1.804	0.206015		1.807	0.154866		1.807	-0.0425465
1.805	0.204862		1.808	0.154518		1.808	-0.0400869
1.806	0.20379		1.809	0.154418		1.809	-0.0375908
1.807	0.202861		1.81	0.154572		1.81	-0.0351271
1.808	0.20217		1.811	0.154978		1.811	-0.0327192
1.809	0.201744		1.812	0.15565		1.812	-0.030342
1.81	0.201525		1.813	0.156612		1.813	-0.0279684
1.811	0.201469		1.814	0.15786		1.814	-0.0256292
1.812	0.201591		1.815	0.159377		1.815	-0.0233936
1.813	0.201922		1.816	0.161153		1.816	-0.0213055
1.814	0.202477		1.817	0.163129		1.817	-0.0193871
1.815	0.203244		1.818	0.165187		1.818	-0.0176573
1.816	0.204182		1.819	0.16725		1.819	-0.0161165
1.817	0.205188		1.82	0.169306		1.82	-0.0147648
1.818	0.206142		1.821	0.171356		1.821	-0.0136437
1.819	0.206994		1.822	0.173366		1.822	-0.0128167
1.82	0.207769		1.823	0.175268		1.823	-0.0123182
1.821	0.208528		1.824	0.177013		1.824	-0.012171
1.822	0.209347		1.825	0.178569		1.825	-0.0124201
1.823	0.210288		1.826	0.179897		1.826	-0.0130974
1.824	0.211358		1.827	0.180981		1.827	-0.014196
1.825	0.212508		1.828	0.181807		1.828	-0.0156911
1.826	0.213683		1.829	0.182353		1.829	-0.0175464
1.827	0.214824		1.83	0.18263		1.83	-0.0197082
1.828	0.215815		1.831	0.18268		1.831	-0.022122
1.829	0.2165		1.832	0.182511		1.832	-0.0247297
1.83	0.216795		1.833	0.182104		1.833	-0.0274465
1.831	0.216726		1.834	0.181475		1.834	-0.03019
1.832	0.216395		1.835	0.180685		1.835	-0.0329138
1.833	0.215917		1.836	0.179775		1.836	-0.0355799
1.834	0.215358		1.837	0.178751		1.837	-0.0381444
1.835	0.214757		1.838	0.177603		1.838	-0.0405739
1.836	0.214141		1.839	0.176303		1.839	-0.042843
1.837	0.213485		1.84	0.174827		1.84	-0.0449273
1.838	0.212702		1.841	0.173213		1.841	-0.0467951
1.839	0.211705		1.842	0.171542		1.842	-0.0484002
1.84	0.210499		1.843	0.169885		1.843	-0.049702
1.841	0.209191		1.844	0.168238		1.844	-0.0506774
1.842	0.207909		1.845	0.166549		1.845	-0.0513102
1.843	0.20667		1.846	0.164772		1.846	-0.0516014
1.844	0.205378		1.847	0.162889		1.847	-0.0515559
1.845	0.203967		1.848	0.160925		1.848	-0.0511635
1.846	0.202495		1.849	0.15894		1.849	-0.050429
1.847	0.201068		1.85	0.156983		1.85	-0.0493791
1.848	0.199736		1.851	0.155075		1.851	-0.0480346
1.849	0.198488		1.852	0.153256		1.852	-0.0464318
1.85	0.197284		1.853	0.15159		1.853	-0.0446443
1.851	0.196111		1.854	0.150109		1.854	-0.0427383
1.852	0.195038		1.855	0.148799		1.855	-0.0407492
1.853	0.194201		1.856	0.147674		1.856	-0.0387035
1.854	0.193698		1.857	0.146784		1.857	-0.0366376
1.855	0.193517		1.858	0.146159		1.858	-0.034598
1.856	0.193575		1.859	0.145795		1.859	-0.0326357
1.857	0.193814		1.86	0.145684		1.86	-0.0308017
1.858	0.194222		1.861	0.145843		1.861	-0.0291208
1.859	0.194796		1.862	0.146286		1.862	-0.0275797
1.86	0.19551		1.863	0.14699		1.863	-0.0261708
1.861	0.196345		1.864	0.147916		1.864	-0.0249115
1.862	0.197278		1.865	0.149025		1.865	-0.0237956
1.863	0.198237		1.866	0.150245		1.866	-0.0227874
1.864	0.199125		1.867	0.151484		1.867	-0.0218871
1.865	0.199886		1.868	0.152704		1.868	-0.0211214
1.866	0.200533		1.869	0.153927		1.869	-0.0204856
1.867	0.201139		1.87	0.155181		1.87	-0.0199684
1.868	0.20174		1.871	0.156469		1.871	-0.0195919
1.869	0.202311		1.872	0.157759		1.872	-0.0193986
1.87	0.202792		1.873	0.158975		1.873	-0.0194225
1.871	0.203101		1.874	0.160059		1.874	-0.019672
1.872	0.203211		1.875	0.161009		1.875	-0.0201378
1.873	0.203153		1.876	0.161795		1.876	-0.0208066
1.874	0.202939		1.877	0.162333		1.877	-0.0216694
1.875	0.202565		1.878	0.162589		1.878	-0.0227131
1.876	0.202043		1.879	0.162607		1.879	-0.0238967
1.877	0.201407		1.88	0.16244		1.88	-0.0251748
1.878	0.200667		1.881	0.162112		1.881	-0.026545
1.879	0.199823		1.882	0.161629		1.882	-0.0280237
1.88	0.198894		1.883	0.160977		1.883	-0.029592
1.881	0.197858		1.884	0.160142		1.884	-0.0312166
1.882	0.196658		1.885	0.159145		1.885	-0.0328831
1.883	0.195269		1.886	0.158043		1.886	-0.034576
1.884	0.193704		1.887	0.156881		1.887	-0.036291
1.885	0.192009		1.888	0.155666		1.888	-0.0380316
1.886	0.19027		1.889	0.154367		1.889	-0.0397717
1.887	0.18859		1.89	0.152966		1.89	-0.0414701
1.888	0.187031		1.891	0.151483		1.891	-0.043094
1.889	0.185534		1.892	0.149949		1.892	-0.0446171
1.89	0.183973		1.893	0.148369		1.893	-0.046022
1.891	0.182293		1.894	0.146731		1.894	-0.0472893
1.892	0.180555		1.895	0.145037		1.895	-0.0483744
1.893	0.178852		1.896	0.143307		1.896	-0.0492144
1.894	0.177231		1.897	0.141598		1.897	-0.0497689
1.895	0.175717		1.898	0.140004		1.898	-0.050043
1.896	0.174358		1.899	0.13857		1.899	-0.0500739
1.897	0.17323		1.9	0.137284		1.9	-0.0498937
1.898	0.172405		1.901	0.136166		1.901	-0.0495069
1.899	0.171923		1.902	0.135278		1.902	-0.0489125
1.9	0.171817		1.903	0.13467		1.903	-0.0481153
1.901	0.172073		1.904	0.134348		1.904	-0.0471191
1.902	0.172596		1.905	0.134311		1.905	-0.0459327
1.903	0.173248		1.906	0.134547		1.906	-0.0445617
1.904	0.173911		1.907	0.135033		1.907	-0.0430066
1.905	0.174544		1.908	0.135728		1.908	-0.0412753
1.906	0.175151		1.909	0.136568		1.909	-0.0393891
1.907	0.175723		1.91	0.137528		1.91	-0.0374096
1.908	0.176217		1.911	0.138627		1.911	-0.0354259
1.909	0.176564		1.912	0.139869		1.912	-0.0334851
1.91	0.176742		1.913	0.141204		1.913	-0.0315924
1.911	0.176811		1.914	0.14257		1.914	-0.0297666
1.912	0.17683		1.915	0.143949		1.915	-0.0280561
1.913	0.176856		1.916	0.145376		1.916	-0.026516
1.914	0.176957		1.917	0.146847		1.917	-0.0251698
1.915	0.177143		1.918	0.148323		1.918	-0.0240025
1.916	0.177346		1.919	0.149811		1.919	-0.02301
1.917	0.177497		1.92	0.151318		1.92	-0.0222299
1.918	0.177565		1.921	0.152764		1.921	-0.0217123
1.919	0.177541		1.922	0.15405		1.922	-0.021494
1.92	0.177401		1.923	0.155129		1.923	-0.0215978
1.921	0.177108		1.924	0.155988		1.924	-0.0220323
1.922	0.176639		1.925	0.156619		1.925	-0.0228019
1.923	0.175992		1.926	0.157006		1.926	-0.0239211
1.924	0.175177		1.927	0.157144		1.927	-0.0253873
1.925	0.174178		1.928	0.157044		1.928	-0.0271539
1.926	0.172927		1.929	0.156723		1.929	-0.0291677
1.927	0.17132		1.93	0.156206		1.93	-0.0313926
1.928	0.16927		1.931	0.155497		1.931	-0.0337824
1.929	0.166652		1.932	0.15457		1.932	-0.0362728
1.93	0.163246		1.933	0.153433		1.933	-0.0388073
1.931	0.1589		1.934	0.152164		1.934	-0.0413538
1.932	0.153635		1.935	0.150829		1.935	-0.0438937
1.933	0.147517		1.936	0.149455		1.936	-0.0464232
1.934	0.140585		1.937	0.148053		1.937	-0.0489489
1.935	0.13287		1.938	0.146618		1.938	-0.0514571
1.936	0.124393		1.939	0.145149		1.939	-0.053912
1.937	0.115202		1.94	0.14368		1.94	-0.0562756
1.938	0.105434		1.941	0.142249		1.941	-0.0585174
1.939	0.0953289		1.942	0.140851		1.942	-0.06061
1.94	0.0851978		1.943	0.139426		1.943	-0.0625177
1.941	0.0753868		1.944	0.137902		1.944	-0.0641885
1.942	0.0662023		1.945	0.136258		1.945	-0.0655476
1.943	0.057877		1.946	0.134569		1.946	-0.0665398
1.944	0.0505922		1.947	0.132922		1.947	-0.0671779
1.945	0.0444797		1.948	0.131331		1.948	-0.0675074
1.946	0.03963		1.949	0.129782		1.949	-0.0675371
1.947	0.0361355		1.95	0.128298		1.95	-0.0672386
1.948	0.0340988		1.951	0.12693		1.951	-0.0665888
1.949	0.0335992		1.952	0.125731		1.952	-0.065588
1.95	0.0346965		1.953	0.124756		1.953	-0.0642728
1.951	0.0374471		1.954	0.124039		1.954	-0.0626903
1.952	0.0418724		1.955	0.123593		1.955	-0.0608622
1.953	0.047942		1.956	0.123426		1.956	-0.0588088
1.954	0.055573		1.957	0.123548		1.957	-0.0565555
1.955	0.0646045		1.958	0.123945		1.958	-0.0541233
1.956	0.0747816		1.959	0.124574		1.959	-0.0515788
1.957	0.0857675		1.96	0.12537		1.96	-0.0490362
1.958	0.0972108		1.961	0.126292		1.961	-0.046571
1.959	0.108811		1.962	0.127351		1.962	-0.0441991
1.96	0.120312		1.963	0.128567		1.963	-0.0419465
1.961	0.13149		1.964	0.129916		1.964	-0.0398759
1.962	0.142142		1.965	0.13134		1.965	-0.0380487
1.963	0.152053		1.966	0.132759		1.966	-0.0365142
1.964	0.160982		1.967	0.134121		1.967	-0.0353107
1.965	0.168695		1.968	0.135425		1.968	-0.0344303
1.966	0.175054		1.969	0.136701		1.969	-0.033823
1.967	0.180076		1.97	0.137974		1.97	-0.0334488
1.968	0.183852		1.971	0.139198		1.971	-0.0332872
1.969	0.186446		1.972	0.140253		1.972	-0.0333262
1.97	0.187926		1.973	0.141051		1.973	-0.0335702
1.971	0.18843		1.974	0.141557		1.974	-0.0340458
1.972	0.188084		1.975	0.141723		1.975	-0.0347779
1.973	0.186967		1.976	0.141508		1.976	-0.0357399
1.974	0.185166		1.977	0.140967		1.977	-0.0368811
1.975	0.182782		1.978	0.140222		1.978	-0.0381885
1.976	0.179921		1.979	0.139362		1.979	-0.0396649
1.977	0.176674		1.98	0.138416		1.98	-0.0412974
1.978	0.173172		1.981	0.137377		1.981	-0.0430688
1.979	0.169605		1.982	0.136221		1.982	-0.0449718
1.98	0.166116		1.983	0.134919		1.983	-0.0470013
1.981	0.16278		1.984	0.133479		1.984	-0.0491282
1.982	0.159692		1.985	0.131929		1.985	-0.0512918
1.983	0.156944		1.986	0.130298		1.986	-0.0534418
1.984	0.15456		1.987	0.128627		1.987	-0.0555672
1.985	0.152512		1.988	0.126931		1.988	-0.0576455
1.986	0.150789		1.989	0.125194		1.989	-0.0596095
1.987	0.149416		1.99	0.123429		1.99	-0.0613926
1.988	0.148389		1.991	0.1217		1.991	-0.0629564
1.989	0.147618		1.992	0.120091		1.992	-0.0642792
1.99	0.146987		1.993	0.118651		1.993	-0.0653558
[truncated: 1,006 more rows]
