# Supplementary material for: A two-lane mechanism for selective biological ammonium transport
Source: eLife. 2020 Jul 14;9:e57183. doi: 10.7554/eLife.57183 (PMC7447429; doi:10.7554/eLife.57183)
Supplement: Figure 3—source data 1. [file elife-57183-fig3-data1.xlsx]

## Sheet: Proton Gradient Figure
2018-10-30-003			2018-11-0014			2018-12-06-0006
LPR 10 AmtB 200 mM NH4+ Static pH 7 N1 M1			LPR 10 AmtB 200 mM NH4+ Inward pH gradient (5>8) N3 M2			LPR 10 AmtB H+ only Inward pH gradient (5>8) N1 M3
waveform	[0]		waveform	[0]		waveform	[0]
t0	43403.4		t0	43433.5		t0	43440.4
delta t	0.001		delta t	0.001		delta t	0.001
time	Y		time	Y [Normalised]		time	Y [Normalised]
0	0		0	-0.187274		0	0.0310372
0.001	8.03103e-06		0.001	-0.187264		0.001	0.0310624
0.002	3.11001e-05		0.002	-0.187237		0.002	0.0311355
0.003	7.80875e-05		0.003	-0.187182		0.003	0.0312827
0.004	0.000157649		0.004	-0.187089		0.004	0.0315246
0.005	0.000277352		0.005	-0.186951		0.005	0.0318756
0.006	0.000441832		0.006	-0.186759		0.006	0.0323449
0.007	0.000653198		0.007	-0.186507		0.007	0.0329347
0.008	0.000913276		0.008	-0.186191		0.008	0.0336404
0.009	0.00122422		0.009	-0.185805		0.009	0.0344513
0.01	0.00158771		0.01	-0.185346		0.01	0.0353541
0.011	0.00200506		0.011	-0.184814		0.011	0.0363386
0.012	0.00247695		0.012	-0.184209		0.012	0.0374037
0.013	0.00300244		0.013	-0.183531		0.013	0.0385611
0.014	0.00357966		0.014	-0.182781		0.014	0.0398346
0.015	0.00420749		0.015	-0.18196		0.015	0.0412574
0.016	0.00488512		0.016	-0.181071		0.016	0.042869
0.017	0.00561064		0.017	-0.180115		0.017	0.0447111
0.018	0.00638145		0.018	-0.179096		0.018	0.0468248
0.019	0.00719536		0.019	-0.17802		0.019	0.0492483
0.02	0.00805061		0.02	-0.176902		0.02	0.0520151
0.021	0.00894522		0.021	-0.175761		0.021	0.0551528
0.022	0.00987672		0.022	-0.174627		0.022	0.0586831
0.023	0.0108422		0.023	-0.173532		0.023	0.0626239
0.024	0.0118384		0.024	-0.172506		0.024	0.0669902
0.025	0.0128624		0.025	-0.171576		0.025	0.0717932
0.026	0.0139111		0.026	-0.170767		0.026	0.0770404
0.027	0.0149818		0.027	-0.1701		0.027	0.0827357
0.028	0.0160715		0.028	-0.16959		0.028	0.088881
0.029	0.0171765		0.029	-0.169249		0.029	0.0954765
0.03	0.0182934		0.03	-0.169086		0.03	0.102521
0.031	0.0194193		0.031	-0.169107		0.031	0.110014
0.032	0.0205514		0.032	-0.169312		0.032	0.117953
0.033	0.0216873		0.033	-0.169697		0.033	0.126336
0.034	0.0228235		0.034	-0.170255		0.034	0.135162
0.035	0.0239562		0.035	-0.170974		0.035	0.144426
0.036	0.0250815		0.036	-0.171844		0.036	0.154124
0.037	0.0261959		0.037	-0.172848		0.037	0.16425
0.038	0.0272958		0.038	-0.173971		0.038	0.174794
0.039	0.0283786		0.039	-0.175193		0.039	0.185747
0.04	0.0294425		0.04	-0.176495		0.04	0.197094
0.041	0.0304861		0.041	-0.177854		0.041	0.20882
0.042	0.0315074		0.042	-0.17925		0.042	0.22091
0.043	0.0325042		0.043	-0.180658		0.043	0.233343
0.044	0.0334741		0.044	-0.182057		0.044	0.246102
0.045	0.0344146		0.045	-0.183424		0.045	0.259161
0.046	0.0353234		0.046	-0.184736		0.046	0.272496
0.047	0.0362005		0.047	-0.185971		0.047	0.286077
0.048	0.0370465		0.048	-0.187106		0.048	0.299872
0.049	0.0378617		0.049	-0.188118		0.049	0.313847
0.05	0.0386457		0.05	-0.188989		0.05	0.327961
0.051	0.0393976		0.051	-0.1897		0.051	0.342175
0.052	0.0401163		0.052	-0.190235		0.052	0.356444
0.053	0.0408004		0.053	-0.19058		0.053	0.370721
0.054	0.0414493		0.054	-0.190722		0.054	0.384958
0.055	0.0420623		0.055	-0.190651		0.055	0.399108
0.056	0.0426376		0.056	-0.190359		0.056	0.413125
0.057	0.0431736		0.057	-0.189841		0.057	0.42696
0.058	0.0436699		0.058	-0.189095		0.058	0.44057
0.059	0.0441269		0.059	-0.188122		0.059	0.453909
0.06	0.0445467		0.06	-0.186926		0.06	0.466933
0.061	0.0449321		0.061	-0.185513		0.061	0.479603
0.062	0.0452852		0.062	-0.183888		0.062	0.491877
0.063	0.0456076		0.063	-0.182064		0.063	0.503719
0.064	0.0459009		0.064	-0.180051		0.064	0.515095
0.065	0.0461662		0.065	-0.177861		0.065	0.525971
0.066	0.0464043		0.066	-0.175507		0.066	0.53632
0.067	0.0466154		0.067	-0.173		0.067	0.546112
0.068	0.0468002		0.068	-0.170356		0.068	0.555322
0.069	0.0469604		0.069	-0.167591		0.069	0.563924
0.07	0.0470976		0.07	-0.164721		0.07	0.571898
0.071	0.047213		0.071	-0.161764		0.071	0.579224
0.072	0.0473075		0.072	-0.158737		0.072	0.585888
0.073	0.0473819		0.073	-0.155657		0.073	0.591873
0.074	0.0474358		0.074	-0.15254		0.074	0.59717
0.075	0.0474693		0.075	-0.149403		0.075	0.60177
0.076	0.0474823		0.076	-0.146264		0.076	0.605666
0.077	0.0474751		0.077	-0.143142		0.077	0.608854
0.078	0.0474486		0.078	-0.140051		0.078	0.611332
0.079	0.0474039		0.079	-0.137009		0.079	0.613099
0.08	0.0473413		0.08	-0.13403		0.08	0.614159
0.081	0.0472619		0.081	-0.131131		0.081	0.614517
0.082	0.0471679		0.082	-0.128328		0.082	0.614182
0.083	0.0470627		0.083	-0.125641		0.083	0.613162
0.084	0.046949		0.084	-0.123087		0.084	0.611472
0.085	0.0468282		0.085	-0.120684		0.085	0.609126
0.086	0.0467009		0.086	-0.118448		0.086	0.606139
0.087	0.0465681		0.087	-0.116396		0.087	0.602529
0.088	0.046432		0.088	-0.114544		0.088	0.598316
0.089	0.0462953		0.089	-0.112909		0.089	0.59352
0.09	0.0461603		0.09	-0.111508		0.09	0.588165
0.091	0.0460287		0.091	-0.11036		0.091	0.582275
0.092	0.0459008		0.092	-0.10948		0.092	0.575872
0.093	0.045776		0.093	-0.108884		0.093	0.568981
0.094	0.0456541		0.094	-0.108586		0.094	0.561629
0.095	0.045535		0.095	-0.108601		0.095	0.553839
0.096	0.0454184		0.096	-0.108941		0.096	0.54564
0.097	0.0453041		0.097	-0.109616		0.097	0.537056
0.098	0.045193		0.098	-0.110638		0.098	0.528114
0.099	0.0450857		0.099	-0.112014		0.099	0.518841
0.1	0.0449821		0.1	-0.113752		0.1	0.509264
0.101	0.044882		0.101	-0.115858		0.101	0.499409
0.102	0.044786		0.102	-0.118334		0.102	0.489306
0.103	0.0446945		0.103	-0.12118		0.103	0.47898
0.104	0.0446071		0.104	-0.124391		0.104	0.468457
0.105	0.0445237		0.105	-0.127966		0.105	0.457763
0.106	0.0444437		0.106	-0.1319		0.106	0.446923
0.107	0.0443663		0.107	-0.136188		0.107	0.43596
0.108	0.0442909		0.108	-0.140821		0.108	0.424899
0.109	0.0442172		0.109	-0.145791		0.109	0.413762
0.11	0.0441456		0.11	-0.151084		0.11	0.402573
0.111	0.0440764		0.111	-0.156689		0.111	0.39135
0.112	0.0440101		0.112	-0.162593		0.112	0.380114
0.113	0.0439475		0.113	-0.16878		0.113	0.368887
0.114	0.0438892		0.114	-0.175232		0.114	0.357689
0.115	0.0438353		0.115	-0.181926		0.115	0.346538
0.116	0.0437856		0.116	-0.188839		0.116	0.335454
0.117	0.0437398		0.117	-0.195948		0.117	0.324453
0.118	0.0436975		0.118	-0.203227		0.118	0.313551
0.119	0.0436581		0.119	-0.21065		0.119	0.302764
0.12	0.0436215		0.12	-0.21819		0.12	0.292106
0.121	0.0435881		0.121	-0.225816		0.121	0.281592
0.122	0.0435578		0.122	-0.2335		0.122	0.271233
0.123	0.0435299		0.123	-0.241213		0.123	0.261039
0.124	0.0435048		0.124	-0.248924		0.124	0.251022
0.125	0.0434834		0.125	-0.256601		0.125	0.241191
0.126	0.0434662		0.126	-0.264213		0.126	0.231556
0.127	0.0434532		0.127	-0.271726		0.127	0.222123
0.128	0.0434441		0.128	-0.27911		0.128	0.212902
0.129	0.0434389		0.129	-0.286333		0.129	0.203897
0.13	0.0434382		0.13	-0.293364		0.13	0.195114
0.131	0.0434422		0.131	-0.300174		0.131	0.186558
0.132	0.0434507		0.132	-0.306735		0.132	0.178234
0.133	0.0434639		0.133	-0.313019		0.133	0.170145
0.134	0.0434818		0.134	-0.319		0.134	0.162294
0.135	0.0435043		0.135	-0.324655		0.135	0.154683
0.136	0.0435308		0.136	-0.329961		0.136	0.147315
0.137	0.0435604		0.137	-0.334898		0.137	0.14019
0.138	0.0435922		0.138	-0.339448		0.138	0.133308
0.139	0.0436262		0.139	-0.343592		0.139	0.126669
0.14	0.0436629		0.14	-0.347317		0.14	0.120273
0.141	0.0437024		0.141	-0.350606		0.141	0.11412
0.142	0.043743		0.142	-0.353448		0.142	0.108207
0.143	0.0437831		0.143	-0.355832		0.143	0.102531
0.144	0.0438225		0.144	-0.357748		0.144	0.0970893
0.145	0.0438619		0.145	-0.35919		0.145	0.0918788
0.146	0.043902		0.146	-0.360153		0.146	0.0868956
0.147	0.0439428		0.147	-0.360635		0.147	0.0821342
0.148	0.0439833		0.148	-0.360635		0.148	0.0775891
0.149	0.0440226		0.149	-0.360154		0.149	0.0732548
0.15	0.044061		0.15	-0.359196		0.15	0.0691255
0.151	0.0440993		0.151	-0.357764		0.151	0.0651949
0.152	0.0441383		0.152	-0.355866		0.152	0.0614578
0.153	0.0441782		0.153	-0.353511		0.153	0.0579094
0.154	0.0442183		0.154	-0.350708		0.154	0.0545453
0.155	0.0442578		0.155	-0.347467		0.155	0.0513598
0.156	0.0442964		0.156	-0.343798		0.156	0.0483474
0.157	0.044334		0.157	-0.339715		0.157	0.0455032
0.158	0.0443701		0.158	-0.335231		0.158	0.0428226
0.159	0.0444043		0.159	-0.33036		0.159	0.0403007
0.16	0.0444369		0.16	-0.325118		0.16	0.037931
0.161	0.0444691		0.161	-0.319522		0.161	0.0357058
0.162	0.0445019		0.162	-0.313589		0.162	0.0336177
0.163	0.0445358		0.163	-0.307338		0.163	0.0316603
0.164	0.0445702		0.164	-0.300788		0.164	0.0298277
0.165	0.0446038		0.165	-0.293956		0.165	0.028114
0.166	0.0446355		0.166	-0.286862		0.166	0.0265132
0.167	0.0446649		0.167	-0.279527		0.167	0.0250187
0.168	0.0446924		0.168	-0.271971		0.168	0.0236239
0.169	0.0447182		0.169	-0.264213		0.169	0.0223232
0.17	0.0447417		0.17	-0.256275		0.17	0.0211113
0.171	0.0447627		0.171	-0.248178		0.171	0.0199825
0.172	0.0447816		0.172	-0.239942		0.172	0.0189313
0.173	0.0447997		0.173	-0.23159		0.173	0.0179522
0.174	0.0448177		0.174	-0.22314		0.174	0.0170398
0.175	0.0448364		0.175	-0.214611		0.175	0.0161889
0.176	0.0448565		0.176	-0.206023		0.176	0.0153956
0.177	0.0448775		0.177	-0.197395		0.177	0.0146575
0.178	0.0448981		0.178	-0.188748		0.178	0.0139715
0.179	0.0449173		0.179	-0.1801		0.179	0.0133332
0.18	0.0449349		0.18	-0.171471		0.18	0.0127378
0.181	0.0449519		0.181	-0.16288		0.181	0.0121811
0.182	0.04497		0.182	-0.154345		0.182	0.0116584
0.183	0.044991		0.183	-0.145885		0.183	0.0111656
0.184	0.0450157		0.184	-0.137515		0.184	0.0106994
0.185	0.0450438		0.185	-0.129252		0.185	0.0102577
0.186	0.0450744		0.186	-0.121111		0.186	0.00983809
0.187	0.0451062		0.187	-0.113107		0.187	0.0094378
0.188	0.045138		0.188	-0.105255		0.188	0.00905414
0.189	0.0451691		0.189	-0.0975697		0.189	0.00868544
0.19	0.0451993		0.19	-0.0900665		0.19	0.00833094
0.191	0.0452289		0.191	-0.0827578		0.191	0.00798972
0.192	0.0452585		0.192	-0.0756545		0.192	0.00766053
0.193	0.0452892		0.193	-0.0687667		0.193	0.00734256
0.194	0.045322		0.194	-0.0621047		0.194	0.00703531
0.195	0.0453578		0.195	-0.0556791		0.195	0.00673767
0.196	0.0453969		0.196	-0.0494994		0.196	0.00644833
0.197	0.0454391		0.197	-0.0435741		0.197	0.00616664
0.198	0.0454835		0.198	-0.0379107		0.198	0.00589183
0.199	0.0455284		0.199	-0.0325148		0.199	0.00562305
0.2	0.0455731		0.2	-0.027391		0.2	0.0053601
0.201	0.0456172		0.201	-0.0225436		0.201	0.00510286
0.202	0.0456608		0.202	-0.0179769		0.202	0.00485117
0.203	0.0457035		0.203	-0.0136931		0.203	0.00460548
0.204	0.0457443		0.204	-0.00969279		0.204	0.00436651
0.205	0.0457824		0.205	-0.00597657		0.205	0.00413469
0.206	0.0458176		0.206	-0.002545		0.206	0.00391002
0.207	0.0458506		0.207	0.000603011		0.207	0.00369195
0.208	0.0458816		0.208	0.00347085		0.208	0.00347968
0.209	0.0459104		0.209	0.00606235		0.209	0.0032729
0.21	0.0459359		0.21	0.00838087		0.21	0.00307201
0.211	0.0459564		0.211	0.01043		0.211	0.00287704
0.212	0.0459709		0.212	0.0122143		0.212	0.00268737
0.213	0.0459805		0.213	0.0137394		0.213	0.00250291
0.214	0.0459858		0.214	0.015012		0.214	0.00232494
0.215	0.0459864		0.215	0.0160392		0.215	0.00215478
0.216	0.045982		0.216	0.0168284		0.216	0.00199276
0.217	0.0459723		0.217	0.0173869		0.217	0.00183857
0.218	0.045957		0.218	0.0177212		0.218	0.00169188
0.219	0.0459359		0.219	0.0178381		0.219	0.00155268
0.22	0.0459088		0.22	0.0177449		0.22	0.0014213
0.221	0.0458752		0.221	0.0174501		0.221	0.00129802
0.222	0.045835		0.222	0.0169626		0.222	0.001183
0.223	0.0457878		0.223	0.0162917		0.223	0.00107644
0.224	0.0457328		0.224	0.0154467		0.224	0.000978123
0.225	0.0456704		0.225	0.0144385		0.225	0.000887796
0.226	0.0456023		0.226	0.0132786		0.226	0.000805273
0.227	0.0455303		0.227	0.0119774		0.227	0.000730789
0.228	0.0454543		0.228	0.0105429		0.228	0.000665518
0.229	0.0453735		0.229	0.00898405		0.229	0.000610638
0.23	0.0452877		0.23	0.00731118		0.23	0.000566191
0.231	0.0451978		0.231	0.00553367		0.231	0.000531392
0.232	0.0451055		0.232	0.00365977		0.232	0.000505255
0.233	0.0450117		0.233	0.00169717		0.233	0.000487062
0.234	0.0449167		0.234	-0.000345221		0.234	0.000476628
0.235	0.04482		0.235	-0.00245889		0.235	0.000474079
0.236	0.0447209		0.236	-0.00463618		0.236	0.000479215
0.237	0.044619		0.237	-0.00686999		0.237	0.000491464
0.238	0.0445151		0.238	-0.00915375		0.238	0.000510237
0.239	0.0444114		0.239	-0.011481		0.239	0.00053472
0.24	0.0443094		0.24	-0.0138452		0.24	0.000564141
0.241	0.0442094		0.241	-0.0162403		0.241	0.000598132
0.242	0.0441109		0.242	-0.0186603		0.242	0.000636193
0.243	0.044014		0.243	-0.0210991		0.243	0.000677451
0.244	0.0439195		0.244	-0.0235509		0.244	0.000721339
0.245	0.0438281		0.245	-0.0260111		0.245	0.000767579
0.246	0.0437409		0.246	-0.0284754		0.246	0.000815744
0.247	0.043659		0.247	-0.0309397		0.247	0.000865253
0.248	0.0435836		0.248	-0.0334005		0.248	0.000915505
0.249	0.0435147		0.249	-0.0358545		0.249	0.000965617
0.25	0.043452		0.25	-0.0382974		0.25	0.0010146
0.251	0.0433959		0.251	-0.040725		0.251	0.00106169
0.252	0.0433469		0.252	-0.0431329		0.252	0.00110604
0.253	0.0433045		0.253	-0.0455177		0.253	0.00114713
0.254	0.0432679		0.254	-0.047876		0.254	0.00118482
0.255	0.0432367		0.255	-0.0502046		0.255	0.00121848
0.256	0.0432116		0.256	-0.0525005		0.256	0.0012471
0.257	0.0431918		0.257	-0.0547605		0.257	0.00127
0.258	0.0431755		0.258	-0.0569823		0.258	0.00128735
0.259	0.0431615		0.259	-0.0591632		0.259	0.0013001
0.26	0.0431496		0.26	-0.0613004		0.26	0.00130945
0.261	0.0431394		0.261	-0.0633908		0.261	0.00131654
0.262	0.0431304		0.262	-0.0654321		0.262	0.00132176
0.263	0.0431223		0.263	-0.0674222		0.263	0.00132445
0.264	0.0431157		0.264	-0.0693586		0.264	0.00132398
0.265	0.0431105		0.265	-0.0712387		0.265	0.00132049
0.266	0.0431078		0.266	-0.0730604		0.266	0.00131416
0.267	0.0431089		0.267	-0.074823		0.267	0.00130493
0.268	0.0431137		0.268	-0.0765254		0.268	0.00129313
0.269	0.043122		0.269	-0.0781668		0.269	0.00127943
0.27	0.043134		0.27	-0.0797459		0.27	0.00126394
0.271	0.0431498		0.271	-0.0812626		0.271	0.00124607
0.272	0.043169		0.272	-0.0827178		0.272	0.00122557
0.273	0.0431909		0.273	-0.0841121		0.273	0.00120317
0.274	0.043215		0.274	-0.0854452		0.274	0.00117988
0.275	0.0432416		0.275	-0.0867172		0.275	0.0011561
0.276	0.0432711		0.276	-0.0879284		0.276	0.00113196
0.277	0.0433043		0.277	-0.0890798		0.277	0.00110784
0.278	0.0433423		0.278	-0.0901722		0.278	0.00108422
0.279	0.0433851		0.279	-0.091207		0.279	0.00106163
0.28	0.0434316		0.28	-0.0921851		0.28	0.00104044
0.281	0.0434805		0.281	-0.0931075		0.281	0.00102056
0.282	0.0435309		0.282	-0.0939756		0.282	0.00100173
0.283	0.0435825		0.283	-0.0947901		0.283	0.000983648
0.284	0.0436347		0.284	-0.0955515		0.284	0.000966432
0.285	0.0436866		0.285	-0.096261		0.285	0.000951119
0.286	0.0437371		0.286	-0.096922		0.286	0.000939003
0.287	0.0437854		0.287	-0.0975392		0.287	0.000931317
0.288	0.0438314		0.288	-0.0981155		0.288	0.000929355
0.289	0.0438749		0.289	-0.0986532		0.289	0.000934006
0.29	0.0439158		0.29	-0.0991541		0.29	0.000945623
0.291	0.0439542		0.291	-0.0996204		0.291	0.000965058
0.292	0.0439905		0.292	-0.100054		0.292	0.000993575
0.293	0.0440252		0.293	-0.100457		0.293	0.00103183
0.294	0.0440577		0.294	-0.100833		0.294	0.00107937
0.295	0.044087		0.295	-0.101183		0.295	0.00113542
0.296	0.0441125		0.296	-0.101512		0.296	0.00120012
0.297	0.0441348		0.297	-0.101821		0.297	0.00127435
0.298	0.0441551		0.298	-0.102112		0.298	0.0013585
0.299	0.0441744		0.299	-0.10239		0.299	0.00145275
0.3	0.0441928		0.3	-0.102658		0.3	0.00155744
0.301	0.0442096		0.301	-0.102919		0.301	0.00167216
0.302	0.0442243		0.302	-0.103178		0.302	0.00179548
0.303	0.0442373		0.303	-0.103441		0.303	0.00192602
0.304	0.0442493		0.304	-0.103712		0.304	0.00206313
0.305	0.0442596		0.305	-0.103996		0.305	0.00220645
0.306	0.0442664		0.306	-0.1043		0.306	0.00235489
0.307	0.044268		0.307	-0.104631		0.307	0.00250585
0.308	0.0442637		0.308	-0.104998		0.308	0.00265477
0.309	0.0442538		0.309	-0.10541		0.309	0.0027943
0.31	0.0442396		0.31	-0.105876		0.31	0.00291245
0.311	0.0442221		0.311	-0.106406		0.311	0.00298863
0.312	0.0442012		0.312	-0.107011		0.312	0.00298501
0.313	0.0441764		0.313	-0.1077		0.313	0.00283063
0.314	0.0441475		0.314	-0.108488		0.314	0.00240284
0.315	0.0441155		0.315	-0.109384		0.315	0.00152174
0.316	0.0440821		0.316	-0.110402		0.316	-3.87383e-05
0.317	0.0440484		0.317	-0.111551		0.317	-0.00253729
0.318	0.0440142		0.318	-0.112842		0.318	-0.00626457
0.319	0.0439788		0.319	-0.114283		0.319	-0.0116466
0.32	0.0439411		0.32	-0.115877		0.32	-0.0194309
0.321	0.0439002		0.321	-0.117624		0.321	-0.0306332
0.322	0.0438556		0.322	-0.119521		0.322	-0.0462088
0.323	0.0438071		0.323	-0.121564		0.323	-0.0668122
0.324	0.0437548		0.324	-0.123744		0.324	-0.0927685
0.325	0.0436991		0.325	-0.126049		0.325	-0.124145
0.326	0.0436404		0.326	-0.128464		0.326	-0.160825
0.327	0.0435795		0.327	-0.130969		0.327	-0.202568
0.328	0.0435171		0.328	-0.133545		0.328	-0.249037
0.329	0.0434532		0.329	-0.136172		0.329	-0.299835
0.33	0.0433866		0.33	-0.138828		0.33	-0.354517
0.331	0.043316		0.331	-0.141491		0.331	-0.412609
0.332	0.0432439		0.332	-0.144137		0.332	-0.47362
0.333	0.0431785		0.333	-0.146739		0.333	-0.53705
0.334	0.0431331		0.334	-0.149272		0.334	-0.602402
0.335	0.0431232		0.335	-0.151705		0.335	-0.669184
0.336	0.0431664		0.336	-0.154009		0.336	-0.736917
0.337	0.0432817		0.337	-0.156144		0.337	-0.805133
0.338	0.043489		0.338	-0.158056		0.338	-0.873377
0.339	0.0438081		0.339	-0.159665		0.339	-0.941217
0.34	0.0442606		0.34	-0.160866		0.34	-1.00825
0.341	0.0448703		0.341	-0.161534		0.341	-1.07409
0.342	0.0456625		0.342	-0.161534		0.342	-1.13839
0.343	0.0466622		0.343	-0.160729		0.343	-1.20083
0.344	0.0478934		0.344	-0.158983		0.344	-1.26111
0.345	0.0493785		0.345	-0.156163		0.345	-1.31893
0.346	0.0511374		0.346	-0.152146		0.346	-1.37403
0.347	0.0531855		0.347	-0.146811		0.347	-1.42613
0.348	0.0555334		0.348	-0.140043		0.348	-1.47499
0.349	0.0581876		0.349	-0.131731		0.349	-1.52037
0.35	0.0611525		0.35	-0.121772		0.35	-1.56205
0.351	0.0644316		0.351	-0.110066		0.351	-1.59981
0.352	0.0680234		0.352	-0.0965257		0.352	-1.63346
0.353	0.0719215		0.353	-0.0810673		0.353	-1.66286
0.354	0.0761178		0.354	-0.0636157		0.354	-1.68786
0.355	0.080604		0.355	-0.0441021		0.355	-1.70838
0.356	0.0853683		0.356	-0.0224672		0.356	-1.72436
0.357	0.0903929		0.357	0.0013375		0.357	-1.73578
0.358	0.0956554		0.358	0.0273482		0.358	-1.74264
0.359	0.101128		0.359	0.0555877		0.359	-1.74498
0.36	0.106776		0.36	0.0860648		0.36	-1.7429
0.361	0.112556		0.361	0.118772		0.361	-1.73648
0.362	0.118422		0.362	0.153683		0.362	-1.72588
0.363	0.124321		0.363	0.190754		0.363	-1.71124
0.364	0.130197		0.364	0.229923		0.364	-1.69272
0.365	0.13599		0.365	0.271107		0.365	-1.6705
0.366	0.141634		0.366	0.31421		0.366	-1.64475
0.367	0.147057		0.367	0.359112		0.367	-1.61568
0.368	0.152187		0.368	0.405683		0.368	-1.58348
0.369	0.156951		0.369	0.453778		0.369	-1.5484
0.37	0.161277		0.37	0.503244		0.37	-1.51065
0.371	0.165099		0.371	0.553923		0.371	-1.47048
0.372	0.168354		0.372	0.605651		0.372	-1.42814
0.373	0.170988		0.373	0.658263		0.373	-1.38389
0.374	0.172957		0.374	0.711592		0.374	-1.33797
0.375	0.174227		0.375	0.765465		0.375	-1.29061
0.376	0.174768		0.376	0.819714		0.376	-1.24205
0.377	0.174557		0.377	0.874166		0.377	-1.19248
0.378	0.173576		0.378	0.928651		0.378	-1.14211
0.379	0.171817		0.379	0.982996		0.379	-1.09114
0.38	0.169275		0.38	1.03703		0.38	-1.03976
0.381	0.165955		0.381	1.0906		0.381	-0.98814
0.382	0.161866		0.382	1.14353		0.382	-0.936455
0.383	0.157022		0.383	1.19568		0.383	-0.884868
0.384	0.151445		0.384	1.24688		0.384	-0.833533
0.385	0.145158		0.385	1.29701		0.385	-0.782601
0.386	0.13819		0.386	1.34592		0.386	-0.732212
0.387	0.130571		0.387	1.39348		0.387	-0.682502
0.388	0.122335		0.388	1.43958		0.388	-0.633597
0.389	0.113519		0.389	1.4841		0.389	-0.585615
0.39	0.104163		0.39	1.52696		0.39	-0.538669
0.391	0.0943069		0.391	1.56807		0.391	-0.492857
0.392	0.0839989		0.392	1.60736		0.392	-0.448271
0.393	0.0732888		0.393	1.6448		0.393	-0.404987
0.394	0.062227		0.394	1.68033		0.394	-0.363073
0.395	0.0508604		0.395	1.71392		0.395	-0.322584
0.396	0.0392283		0.396	1.74553		0.396	-0.283565
0.397	0.0273608		0.397	1.77512		0.397	-0.246057
0.398	0.0152827		0.398	1.80267		0.398	-0.210092
0.399	0.00302023		0.399	1.82815		0.399	-0.175698
0.4	-0.00939206		0.4	1.85155		0.4	-0.142898
0.401	-0.0219097		0.401	1.87284		0.401	-0.111717
0.402	-0.0344815		0.402	1.89201		0.402	-0.082188
0.403	-0.0470545		0.403	1.90906		0.403	-0.0543473
0.404	-0.0595771		0.404	1.924		0.404	-0.0282175
0.405	-0.0720008		0.405	1.93683		0.405	-0.00380184
0.406	-0.084281		0.406	1.94759		0.406	0.0189141
0.407	-0.0963775		0.407	1.95629		0.407	0.0399585
0.408	-0.108253		0.408	1.96298		0.408	0.0593695
0.409	-0.119873		0.409	1.9677		0.409	0.077192
0.41	-0.131206		0.41	1.97049		0.41	0.0934761
0.411	-0.142223		0.411	1.97142		0.411	0.108276
0.412	-0.152897		0.412	1.97052		0.412	0.121652
0.413	-0.163206		0.413	1.96787		0.413	0.133665
0.414	-0.173132		0.414	1.96351		0.414	0.144381
0.415	-0.182656		0.415	1.9575		0.415	0.153868
0.416	-0.191761		0.416	1.94989		0.416	0.162192
0.417	-0.200422		0.417	1.94075		0.417	0.169419
0.418	-0.208611		0.418	1.93013		0.418	0.175613
0.419	-0.2163		0.419	1.91809		0.419	0.180832
0.42	-0.223464		0.42	1.9047		0.42	0.185135
0.421	-0.230077		0.421	1.89002		0.421	0.188581
0.422	-0.236121		0.422	1.87412		0.422	0.191227
0.423	-0.241577		0.423	1.85708		0.423	0.193122
0.424	-0.246428		0.424	1.83896		0.424	0.194315
0.425	-0.250661		0.425	1.81985		0.425	0.194852
0.426	-0.254266		0.426	1.79981		0.426	0.194784
0.427	-0.257236		0.427	1.77893		0.427	0.194172
0.428	-0.259569		0.428	1.75726		0.428	0.193078
0.429	-0.261268		0.429	1.73488		0.429	0.191568
0.43	-0.262338		0.43	1.71187		0.43	0.189709
0.431	-0.26279		0.431	1.68828		0.431	0.187563
0.432	-0.262637		0.432	1.66418		0.432	0.185195
0.433	-0.261893		0.433	1.63963		0.433	0.182665
0.434	-0.260572		0.434	1.61469		0.434	0.18003
0.435	-0.25869		0.435	1.58941		0.435	0.177346
0.436	-0.256266		0.436	1.56384		0.436	0.174665
0.437	-0.253319		0.437	1.53803		0.437	0.172034
0.438	-0.249871		0.438	1.51202		0.438	0.169495
0.439	-0.245944		0.439	1.48585		0.439	0.167084
0.44	-0.241558		0.44	1.45956		0.44	0.164835
0.441	-0.236732		0.441	1.43318		0.441	0.162773
0.442	-0.231485		0.442	1.40675		0.442	0.160915
0.443	-0.225836		0.443	1.3803		0.443	0.159273
0.444	-0.219801		0.444	1.35387		0.444	0.157855
0.445	-0.213398		0.445	1.32748		0.445	0.156661
0.446	-0.206645		0.446	1.30118		0.446	0.155689
0.447	-0.199562		0.447	1.275		0.447	0.154932
0.448	-0.192173		0.448	1.24896		0.448	0.154377
0.449	-0.184498		0.449	1.22309		0.449	0.154014
0.45	-0.176561		0.45	1.19743		0.45	0.153831
0.451	-0.168383		0.451	1.17201		0.451	0.153822
0.452	-0.159989		0.452	1.14684		0.452	0.153979
0.453	-0.151403		0.453	1.12197		0.453	0.154298
0.454	-0.14265		0.454	1.0974		0.454	0.154773
0.455	-0.133754		0.455	1.07317		0.455	0.155395
0.456	-0.124734		0.456	1.0493		0.456	0.156157
0.457	-0.11561		0.457	1.02581		0.457	0.157048
0.458	-0.106401		0.458	1.00271		0.458	0.15805
0.459	-0.0971266		0.459	0.98004		0.459	0.159142
0.46	-0.087813		0.46	0.957807		0.46	0.1603
0.461	-0.0784893		0.461	0.936034		0.461	0.1615
0.462	-0.0691919		0.462	0.914739		0.462	0.162721
0.463	-0.0599673		0.463	0.89394		0.463	0.163944
0.464	-0.050872		0.464	0.873655		0.464	0.165151
0.465	-0.0419659		0.465	0.853901		0.465	0.16633
0.466	-0.0333087		0.466	0.834689		0.466	0.167475
0.467	-0.024955		0.467	0.816036		0.467	0.168586
0.468	-0.0169507		0.468	0.797953		0.468	0.169667
0.469	-0.0093321		0.469	0.780452		0.469	0.170722
0.47	-0.00213025		0.47	0.763541		0.47	0.171759
0.471	0.00462743		0.471	0.747232		0.471	0.172786
0.472	0.010917		0.472	0.73153		0.472	0.173809
0.473	0.016719		0.473	0.716439		0.473	0.174835
0.474	0.022018		0.474	0.701965		0.474	0.175869
0.475	0.0268023		0.475	0.688109		0.475	0.176916
0.476	0.0310626		0.476	0.674873		0.476	0.177978
0.477	0.0347926		0.477	0.662259		0.477	0.179061
0.478	0.037988		0.478	0.650263		0.478	0.180167
0.479	0.0406473		0.479	0.638881		0.479	0.181299
0.48	0.0427718		0.48	0.628103		0.48	0.182459
0.481	0.0443651		0.481	0.617922		0.481	0.183644
0.482	0.045431		0.482	0.608326		0.482	0.184852
0.483	0.0459734		0.483	0.599304		0.483	0.186083
0.484	0.0459964		0.484	0.590842		0.484	0.187333
0.485	0.0455058		0.485	0.582929		0.485	0.1886
0.486	0.0445092		0.486	0.57555		0.486	0.189881
0.487	0.0430194		0.487	0.56869		0.487	0.191172
0.488	0.0410564		0.488	0.56233		0.488	0.192467
0.489	0.0386463		0.489	0.556453		0.489	0.193759
0.49	0.0358191		0.49	0.551043		0.49	0.195044
0.491	0.0326072		0.491	0.546083		0.491	0.196313
0.492	0.0290431		0.492	0.541557		0.492	0.19756
0.493	0.0251585		0.493	0.537447		0.493	0.198779
0.494	0.0209835		0.494	0.533736		0.494	0.199964
0.495	0.0165468		0.495	0.530407		0.495	0.201111
0.496	0.0118758		0.496	0.527442		0.496	0.202214
0.497	0.00699661		0.497	0.524825		0.497	0.203268
0.498	0.0019345		0.498	0.522538		0.498	0.204268
0.499	-0.00328581		0.499	0.52056		0.499	0.205212
0.5	-0.00864041		0.5	0.518875		0.5	0.206098
0.501	-0.0141061		0.501	0.517465		0.501	0.206923
0.502	-0.0196599		0.502	0.516311		0.502	0.207686
0.503	-0.0252792		0.503	0.515395		0.503	0.208387
0.504	-0.0309428		0.504	0.514698		0.504	0.209022
0.505	-0.0366308		0.505	0.514202		0.505	0.209589
0.506	-0.0423244		0.506	0.513891		0.506	0.210085
0.507	-0.0480056		0.507	0.51375		0.507	0.210513
0.508	-0.0536583		0.508	0.513761		0.508	0.210872
0.509	-0.0592668		0.509	0.513908		0.509	0.211168
0.51	-0.0648144		0.51	0.514175		0.51	0.2114
0.511	-0.0702849		0.511	0.514546		0.511	0.211571
0.512	-0.0756638		0.512	0.515005		0.512	0.21168
0.513	-0.0809375		0.513	0.515536		0.513	0.21173
0.514	-0.0860917		0.514	0.516125		0.514	0.211721
0.515	-0.091111		0.515	0.516758		0.515	0.211657
0.516	-0.0959789		0.516	0.517422		0.516	0.211539
0.517	-0.100678		0.517	0.518106		0.517	0.21137
0.518	-0.105193		0.518	0.518799		0.518	0.211152
0.519	-0.109508		0.519	0.51949		0.519	0.210885
0.52	-0.113609		0.52	0.520169		0.52	0.210571
0.521	-0.117486		0.521	0.520827		0.521	0.21021
0.522	-0.121133		0.522	0.521452		0.522	0.209804
0.523	-0.124544		0.523	0.522036		0.523	0.209354
0.524	-0.127715		0.524	0.52257		0.524	0.208861
0.525	-0.130646		0.525	0.523044		0.525	0.208326
0.526	-0.133338		0.526	0.523452		0.526	0.20775
0.527	-0.135798		0.527	0.523788		0.527	0.207136
0.528	-0.138031		0.528	0.524048		0.528	0.206482
0.529	-0.140048		0.529	0.524228		0.529	0.205788
0.53	-0.141858		0.53	0.524328		0.53	0.205056
0.531	-0.143474		0.531	0.524341		0.531	0.204287
0.532	-0.14491		0.532	0.524266		0.532	0.203482
0.533	-0.146181		0.533	0.524097		0.533	0.202645
0.534	-0.147303		0.534	0.52383		0.534	0.201779
0.535	-0.148291		0.535	0.523461		0.535	0.200885
0.536	-0.149157		0.536	0.522988		0.536	0.199967
0.537	-0.149914		0.537	0.522407		0.537	0.199026
0.538	-0.150568		0.538	0.521715		0.538	0.198065
0.539	-0.151126		0.539	0.520907		0.539	0.197084
0.54	-0.151591		0.54	0.519978		0.54	0.196084
0.541	-0.151965		0.541	0.518923		0.541	0.195065
0.542	-0.152254		0.542	0.517738		0.542	0.194031
0.543	-0.152464		0.543	0.516419		0.543	0.192981
0.544	-0.152603		0.544	0.514962		0.544	0.19192
0.545	-0.152678		0.545	0.513362		0.545	0.190849
0.546	-0.152698		0.546	0.511618		0.546	0.18977
0.547	-0.152669		0.547	0.509726		0.547	0.188685
0.548	-0.152602		0.548	0.507685		0.548	0.187596
0.549	-0.152506		0.549	0.505493		0.549	0.186507
0.55	-0.15239		0.55	0.503147		0.55	0.185418
0.551	-0.152261		0.551	0.500649		0.551	0.184332
0.552	-0.152124		0.552	0.497998		0.552	0.18325
0.553	-0.151981		0.553	0.495193		0.553	0.182175
0.554	-0.151833		0.554	0.492232		0.554	0.18111
0.555	-0.151683		0.555	0.489115		0.555	0.180056
0.556	-0.151529		0.556	0.485844		0.556	0.179016
0.557	-0.15137		0.557	0.482419		0.557	0.177991
0.558	-0.151197		0.558	0.478842		0.558	0.176981
0.559	-0.151004		0.559	0.475116		0.559	0.175988
0.56	-0.15078		0.56	0.471243		0.56	0.175011
0.561	-0.150513		0.561	0.467227		0.561	0.174052
0.562	-0.15019		0.562	0.463073		0.562	0.17311
0.563	-0.149797		0.563	0.458787		0.563	0.172185
0.564	-0.149322		0.564	0.454374		0.564	0.171279
0.565	-0.148751		0.565	0.449838		0.565	0.170391
0.566	-0.148071		0.566	0.445184		0.566	0.169521
0.567	-0.147271		0.567	0.440416		0.567	0.168666
0.568	-0.146342		0.568	0.43554		0.568	0.167826
0.569	-0.145274		0.569	0.430563		0.569	0.167002
0.57	-0.144062		0.57	0.425492		0.57	0.166192
0.571	-0.142705		0.571	0.420332		0.571	0.165398
0.572	-0.141202		0.572	0.415091		0.572	0.164619
0.573	-0.139557		0.573	0.409777		0.573	0.163854
0.574	-0.13777		0.574	0.404395		0.574	0.163101
0.575	-0.135844		0.575	0.398952		0.575	0.16236
0.576	-0.133782		0.576	0.393452		0.576	0.161629
0.577	-0.131588		0.577	0.387904		0.577	0.160908
0.578	-0.129268		0.578	0.382311		0.578	0.160194
0.579	-0.126827		0.579	0.376678		0.579	0.159485
0.58	-0.12427		0.58	0.371007		0.58	0.158782
0.581	-0.121606		0.581	0.365302		0.581	0.158082
0.582	-0.118844		0.582	0.359565		0.582	0.157386
0.583	-0.115991		0.583	0.3538		0.583	0.156691
0.584	-0.113059		0.584	0.348009		0.584	0.155999
0.585	-0.110056		0.585	0.342196		0.585	0.15531
0.586	-0.106992		0.586	0.336362		0.586	0.154624
0.587	-0.103876		0.587	0.330509		0.587	0.153943
0.588	-0.100719		0.588	0.32464		0.588	0.153268
0.589	-0.097533		0.589	0.318757		0.589	0.152597
0.59	-0.0943296		0.59	0.312863		0.59	0.15193
0.591	-0.0911214		0.591	0.306958		0.591	0.151266
0.592	-0.0879226		0.592	0.301044		0.592	0.150603
0.593	-0.0847493		0.593	0.295122		0.593	0.149944
0.594	-0.0816186		0.594	0.289196		0.594	0.149287
0.595	-0.0785478		0.595	0.283267		0.595	0.148633
0.596	-0.0755543		0.596	0.27734		0.596	0.14798
0.597	-0.0726559		0.597	0.271415		0.597	0.147326
0.598	-0.0698679		0.598	0.265497		0.598	0.146671
0.599	-0.0671992		0.599	0.259587		0.599	0.146013
0.6	-0.0646534		0.6	0.253689		0.6	0.145352
0.601	-0.0622327		0.601	0.247807		0.601	0.144688
0.602	-0.0599393		0.602	0.241943		0.602	0.144018
0.603	-0.0577763		0.603	0.236105		0.603	0.143341
0.604	-0.055747		0.604	0.230295		0.604	0.142656
0.605	-0.0538541		0.605	0.22452		0.605	0.141962
0.606	-0.0520999		0.606	0.218786		0.606	0.141258
0.607	-0.0504866		0.607	0.213098		0.607	0.140547
0.608	-0.0490159		0.608	0.207464		0.608	0.139829
0.609	-0.0476881		0.609	0.201888		0.609	0.139103
0.61	-0.0465014		0.61	0.196375		0.61	0.138369
0.611	-0.0454527		0.611	0.190931		0.611	0.137627
0.612	-0.044538		0.612	0.185564		0.612	0.136878
0.613	-0.0437525		0.613	0.180277		0.613	0.136123
0.614	-0.0430914		0.614	0.175076		0.614	0.135359
0.615	-0.0425496		0.615	0.169964		0.615	0.134587
0.616	-0.0421218		0.616	0.164945		0.616	0.133806
0.617	-0.0418019		0.617	0.160024		0.617	0.133016
0.618	-0.0415824		0.618	0.155203		0.618	0.132219
0.619	-0.0414548		0.619	0.150486		0.619	0.131414
0.62	-0.0414102		0.62	0.145874		0.62	0.130604
0.621	-0.0414392		0.621	0.141366		0.621	0.129788
0.622	-0.0415319		0.622	0.136964		0.622	0.128968
0.623	-0.0416781		0.623	0.132669		0.623	0.128144
0.624	-0.0418692		0.624	0.12848		0.624	0.127314
0.625	-0.0420978		0.625	0.124397		0.625	0.126479
0.626	-0.0423564		0.626	0.120418		0.626	0.12564
0.627	-0.0426379		0.627	0.116541		0.627	0.124799
0.628	-0.0429365		0.628	0.112764		0.628	0.123957
0.629	-0.0432474		0.629	0.109086		0.629	0.123115
0.63	-0.0435669		0.63	0.105503		0.63	0.122272
0.631	-0.0438925		0.631	0.102012		0.631	0.121427
0.632	-0.0442235		0.632	0.0986119		0.632	0.120579
0.633	-0.0445609		0.633	0.0953005		0.633	0.119728
0.634	-0.0449078		0.634	0.0920752		0.634	0.118876
0.635	-0.04527		0.635	0.0889324		0.635	0.118024
0.636	-0.045654		0.636	0.085869		0.636	0.117175
0.637	-0.0460659		0.637	0.0828817		0.637	0.116328
0.638	-0.0465111		0.638	0.0799676		0.638	0.115481
0.639	-0.0469931		0.639	0.0771253		0.639	0.114637
0.64	-0.0475117		0.64	0.0743535		0.64	0.113796
0.641	-0.0480642		0.641	0.0716506		0.641	0.112958
0.642	-0.0486458		0.642	0.0690146		0.642	0.112122
0.643	-0.0492502		0.643	0.0664434		0.643	0.11129
0.644	-0.0498682		0.644	0.0639361		0.644	0.110462
0.645	-0.0504889		0.645	0.0614916		0.645	0.109638
0.646	-0.0510994		0.646	0.0591102		0.646	0.108818
0.647	-0.0516873		0.647	0.0567928		0.647	0.108002
0.648	-0.0522405		0.648	0.0545405		0.648	0.107189
0.649	-0.0527476		0.649	0.0523545		0.649	0.10638
0.65	-0.0531981		0.65	0.0502359		0.65	0.105574
0.651	-0.0535821		0.651	0.0481872		0.651	0.104774
0.652	-0.0538918		0.652	0.0462115		0.652	0.103982
0.653	-0.0541204		0.653	0.0443113		0.653	0.103196
0.654	-0.0542606		0.654	0.0424892		0.654	0.102416
0.655	-0.0543045		0.655	0.0407488		0.655	0.101644
0.656	-0.0542443		0.656	0.0390935		0.656	0.100878
0.657	-0.0540744		0.657	0.037528		0.657	0.100119
0.658	-0.0537927		0.658	0.0360571		0.658	0.0993678
0.659	-0.0534006		0.659	0.0346871		0.659	0.0986254
0.66	-0.0529023		0.66	0.0334234		0.66	0.0978916
0.661	-0.0523046		0.661	0.0322702		0.661	0.0971665
0.662	-0.0516147		0.662	0.0312316		0.662	0.09645
0.663	-0.0508407		0.663	0.0303115		0.663	0.0957419
0.664	-0.0499915		0.664	0.0295143		0.664	0.0950423
0.665	-0.0490754		0.665	0.0288446		0.665	0.0943517
0.666	-0.048101		0.666	0.0283057		0.666	0.0936706
0.667	-0.047076		0.667	0.0278995		0.667	0.0929996
0.668	-0.0460074		0.668	0.027627		0.668	0.0923394
0.669	-0.0449026		0.669	0.0274879		0.669	0.0916906
0.67	-0.0437692		0.67	0.027482		0.67	0.0910544
0.671	-0.0426141		0.671	0.0276095		0.671	0.090432
0.672	-0.0414444		0.672	0.0278701		0.672	0.0898237
0.673	-0.0402674		0.673	0.0282624		0.673	0.0892297
0.674	-0.0390903		0.674	0.0287836		0.674	0.0886501
0.675	-0.0379197		0.675	0.0294302		0.675	0.0880846
0.676	-0.036762		0.676	0.0301992		0.676	0.0875329
0.677	-0.0356231		0.677	0.0310871		0.677	0.0869947
0.678	-0.0345083		0.678	0.0320898		0.678	0.08647
0.679	-0.0334226		0.679	0.0332018		0.679	0.0859588
0.68	-0.0323706		0.68	0.0344157		0.68	0.0854605
0.681	-0.0313565		0.681	0.0357234		0.681	0.0849742
0.682	-0.0303841		0.682	0.0371169		0.682	0.0844998
0.683	-0.0294555		0.683	0.0385878		0.683	0.0840377
0.684	-0.0285719		0.684	0.0401263		0.684	0.0835873
0.685	-0.0277347		0.685	0.0417227		0.685	0.083147
0.686	-0.0269458		0.686	0.0433671		0.686	0.0827149
0.687	-0.0262068		0.687	0.0450494		0.687	0.082289
0.688	-0.0255191		0.688	0.0467596		0.688	0.0818693
0.689	-0.024884		0.689	0.0484876		0.689	0.0814563
0.69	-0.024302		0.69	0.0502242		0.69	0.0810492
0.691	-0.0237734		0.691	0.0519592		0.691	0.0806473
0.692	-0.0232984		0.692	0.0536826		0.692	0.0802499
0.693	-0.0228756		0.693	0.0553847		0.693	0.079857
0.694	-0.022503		0.694	0.0570559		0.694	0.0794682
0.695	-0.0221786		0.695	0.0586864		0.695	0.0790824
0.696	-0.0219009		0.696	0.0602673		0.696	0.0786981
0.697	-0.0216682		0.697	0.0617905		0.697	0.0783138
0.698	-0.0214782		0.698	0.0632492		0.698	0.0779297
0.699	-0.0213274		0.699	0.0646386		0.699	0.077546
0.7	-0.0212116		0.7	0.0659546		0.7	0.0771627
0.701	-0.0211269		0.701	0.0671932		0.701	0.0767791
0.702	-0.0210691		0.702	0.0683505		0.702	0.0763939
0.703	-0.0210332		0.703	0.0694227		0.703	0.0760053
0.704	-0.0210126		0.704	0.070407		0.704	0.0756116
0.705	-0.0210007		0.705	0.0713023		0.705	0.0752115
0.706	-0.0209914		0.706	0.0721082		0.706	0.0748043
0.707	-0.02098		0.707	0.0728247		0.707	0.0743904
0.708	-0.0209645		0.708	0.0734528		0.708	0.0739695
0.709	-0.0209455		0.709	0.0739946		0.709	0.0735409
0.71	-0.0209247		0.71	0.0744521		0.71	0.0731044
0.711	-0.0209052		0.711	0.0748281		0.711	0.0726602
0.712	-0.020891		0.712	0.0751258		0.712	0.0722084
0.713	-0.0208865		0.713	0.0753486		0.713	0.0717475
0.714	-0.0208971		0.714	0.075501		0.714	0.071276
0.715	-0.020929		0.715	0.075588		0.715	0.0707924
0.716	-0.0209888		0.716	0.0756145		0.716	0.0702975
0.717	-0.0210838		0.717	0.0755858		0.717	0.0697936
0.718	-0.0212207		0.718	0.0755076		0.718	0.0692828
0.719	-0.0214056		0.719	0.0753856		0.719	0.0687658
0.72	-0.0216435		0.72	0.0752262		0.72	0.068242
0.721	-0.0219398		0.721	0.0750351		0.721	0.0677112
0.722	-0.0223006		0.722	0.0748176		0.722	0.0671732
0.723	-0.0227324		0.723	0.0745782		0.723	0.0666282
0.724	-0.0232407		0.724	0.0743206		0.724	0.0660768
0.725	-0.0238294		0.725	0.0740485		0.725	0.0655204
0.726	-0.0245016		0.726	0.0737639		0.726	0.0649602
0.727	-0.0252602		0.727	0.0734687		0.727	0.0643968
0.728	-0.0261076		0.728	0.0731644		0.728	0.0638298
0.729	-0.0270456		0.729	0.0728535		0.729	0.0632593
0.73	-0.0280743		0.73	0.0725385		0.73	0.062685
0.731	-0.0291936		0.731	0.0722197		0.731	0.0621057
0.732	-0.0304034		0.732	0.0718961		0.732	0.0615207
0.733	-0.0317034		0.733	0.0715672		0.733	0.0609296
0.734	-0.0330926		0.734	0.0712338		0.734	0.0603329
0.735	-0.0345696		0.735	0.0708963		0.735	0.0597307
0.736	-0.0361324		0.736	0.0705545		0.736	0.0591233
0.737	-0.0377788		0.737	0.0702078		0.737	0.0585113
0.738	-0.0395046		0.738	0.0698558		0.738	0.0578957
0.739	-0.0413024		0.739	0.0694965		0.739	0.0572775
0.74	-0.0431623		0.74	0.0691273		0.74	0.0566572
0.741	-0.0450732		0.741	0.0687449		0.741	0.056035
0.742	-0.047022		0.742	0.0683464		0.742	0.0554111
0.743	-0.0489942		0.743	0.0679302		0.743	0.0547856
0.744	-0.0509749		0.744	0.0674953		0.744	0.0541585
0.745	-0.0529501		0.745	0.0670404		0.745	0.0535306
0.746	-0.0549053		0.746	0.0665643		0.746	0.0529034
0.747	-0.0568264		0.747	0.0660651		0.747	0.0522785
0.748	-0.0587003		0.748	0.0655413		0.748	0.0516572
0.749	-0.0605151		0.749	0.0649916		0.749	0.0510407
0.75	-0.0622587		0.75	0.0644149		0.75	0.0504299
0.751	-0.0639191		0.751	0.0638103		0.751	0.0498259
0.752	-0.0654851		0.752	0.0631767		0.752	0.0492295
0.753	-0.066946		0.753	0.0625142		0.753	0.0486409
0.754	-0.0682919		0.754	0.0618237		0.754	0.0480596
0.755	-0.0695156		0.755	0.0611059		0.755	0.0474842
0.756	-0.0706118		0.756	0.0603607		0.756	0.0469131
0.757	-0.0715773		0.757	0.0595882		0.757	0.0463456
0.758	-0.0724096		0.758	0.0587898		0.758	0.0457823
0.759	-0.0731062		0.759	0.0579673		0.759	0.045224
0.76	-0.0736665		0.76	0.0571222		0.76	0.0446713
0.761	-0.0740913		0.761	0.0562561		0.761	0.044125
0.762	-0.0743824		0.762	0.0553703		0.762	0.0435854
0.763	-0.0745418		0.763	0.054467		0.763	0.0430535
0.764	-0.0745724		0.764	0.0535481		0.764	0.0425304
0.765	-0.0744782		0.765	0.0526165		0.765	0.0420168
0.766	-0.0742636		0.766	0.0516756		0.766	0.0415124
0.767	-0.0739334		0.767	0.0507285		0.767	0.0410169
0.768	-0.0734936		0.768	0.0497772		0.768	0.0405302
0.769	-0.0729503		0.769	0.048823		0.769	0.0400527
0.77	-0.0723087		0.77	0.0478668		0.77	0.0395843
0.771	-0.071575		0.771	0.0469098		0.771	0.0391244
0.772	-0.070756		0.772	0.0459532		0.772	0.0386729
0.773	-0.0698589		0.773	0.0449993		0.773	0.0382301
0.774	-0.0688909		0.774	0.0440498		0.774	0.0377965
0.775	-0.0678584		0.775	0.0431056		0.775	0.037372
0.776	-0.0667675		0.776	0.0421673		0.776	0.0369558
0.777	-0.0656249		0.777	0.0412356		0.777	0.0365473
0.778	-0.0644372		0.778	0.0403113		0.778	0.0361459
0.779	-0.0632098		0.779	0.0393941		0.779	0.0357516
0.78	-0.0619462		0.78	0.0384837		0.78	0.0353651
0.781	-0.0606493		0.781	0.0375793		0.781	0.0349868
0.782	-0.0593231		0.782	0.0366792		0.782	0.0346161
0.783	-0.0579728		0.783	0.0357817		0.783	0.0342525
0.784	-0.0566035		0.784	0.0348863		0.784	0.0338953
0.785	-0.0552193		0.785	0.0339926		0.785	0.0335442
0.786	-0.0538244		0.786	0.0331002		0.786	0.0331995
0.787	-0.0524231		0.787	0.032209		0.787	0.0328615
0.788	-0.0510197		0.788	0.031318		0.788	0.0325299
0.789	-0.0496184		0.789	0.0304248		0.789	0.0322036
0.79	-0.048224		0.79	0.0295273		0.79	0.0318823
0.791	-0.0468411		0.791	0.0286245		0.791	0.0315659
0.792	-0.0454736		0.792	0.0277156		0.792	0.0312559
0.793	-0.0441246		0.793	0.0268002		0.793	0.0309537
0.794	-0.0427966		0.794	0.0258785		0.794	0.03066
0.795	-0.041492		0.795	0.0249511		0.795	0.0303747
0.796	-0.0402129		0.796	0.024019		0.796	0.0300973
0.797	-0.0389605		0.797	0.0230834		0.797	0.0298269
0.798	-0.037736		0.798	0.0221448		0.798	0.0295634
0.799	-0.0365407		0.799	0.0212035		0.799	0.0293075
0.8	-0.0353734		0.8	0.0202614		0.8	0.02906
0.801	-0.0342302		0.801	0.0193214		0.801	0.028822
0.802	-0.0331053		0.802	0.0183863		0.802	0.0285935
0.803	-0.0319923		0.803	0.0174583		0.803	0.0283741
0.804	-0.030885		0.804	0.0165389		0.804	0.0281633
0.805	-0.0297777		0.805	0.0156291		0.805	0.0279604
0.806	-0.0286647		0.806	0.0147306		0.806	0.027765
0.807	-0.0275407		0.807	0.0138458		0.807	0.0275763
0.808	-0.0264021		0.808	0.0129778		0.808	0.0273931
0.809	-0.0252487		0.809	0.0121296		0.809	0.0272143
0.81	-0.0240837		0.81	0.0113037		0.81	0.0270395
0.811	-0.022912		0.811	0.0105028		0.811	0.026868
0.812	-0.0217403		0.812	0.00973095		0.812	0.0266999
0.813	-0.0205763		0.813	0.00899243		0.813	0.0265355
0.814	-0.0194277		0.814	0.00829079		0.814	0.0263753
0.815	-0.0183028		0.815	0.00762823		0.815	0.0262193
0.816	-0.01721		0.816	0.00700602		0.816	0.026067
0.817	-0.0161565		0.817	0.00642518		0.817	0.0259189
0.818	-0.0151481		0.818	0.00588696		0.818	0.025776
0.819	-0.0141911		0.819	0.00539274		0.819	0.0256387
0.82	-0.0132928		0.82	0.0049435		0.82	0.025507
0.821	-0.0124597		0.821	0.00454003		0.821	0.0253808
0.822	-0.0116975		0.822	0.00418256		0.822	0.0252605
0.823	-0.0110104		0.823	0.00387021		0.823	0.0251466
0.824	-0.0104028		0.824	0.0036012		0.824	0.0250393
0.825	-0.00987841		0.825	0.0033732		0.825	0.0249376
0.826	-0.00943968		0.826	0.00318341		0.826	0.0248402
0.827	-0.00908942		0.827	0.00302925		0.827	0.024747
0.828	-0.00883069		0.828	0.0029086		0.828	0.0246579
0.829	-0.00866562		0.829	0.00281969		0.829	0.0245726
0.83	-0.00859448		0.83	0.00276047		0.83	0.0244911
0.831	-0.00861567		0.831	0.00272777		0.831	0.0244133
0.832	-0.00872625		0.832	0.00271756		0.832	0.0243384
0.833	-0.00892298		0.833	0.00272594		0.833	0.0242669
0.834	-0.00920293		0.834	0.00274901		0.834	0.0242006
0.835	-0.00956317		0.835	0.00278222		0.835	0.0241407
0.836	-0.0099998		0.836	0.00282028		0.836	0.0240863
0.837	-0.010508		0.837	0.00285783		0.837	0.0240355
0.838	-0.0110838		0.838	0.00289031		0.838	0.0239869
0.839	-0.0117243		0.839	0.00291389		0.839	0.0239394
0.84	-0.0124253		0.84	0.00292543		0.84	0.0238926
0.841	-0.0131811		0.841	0.00292146		0.841	0.0238456
0.842	-0.0139828		0.842	0.00289809		0.842	0.0237979
0.843	-0.0148198		0.843	0.00285114		0.843	0.0237497
0.844	-0.015685		0.844	0.0027773		0.844	0.0237016
0.845	-0.0165753		0.845	0.00267465		0.845	0.0236542
0.846	-0.0174899		0.846	0.00254231		0.846	0.0236084
0.847	-0.0184282		0.847	0.0023789		0.847	0.023565
0.848	-0.0193883		0.848	0.00218235		0.848	0.0235245
0.849	-0.0203662		0.849	0.00195148		0.849	0.0234863
0.85	-0.0213567		0.85	0.00168512		0.85	0.0234497
0.851	-0.0223553		0.851	0.00138202		0.851	0.0234145
0.852	-0.0233584		0.852	0.00104153		0.852	0.0233801
0.853	-0.0243635		0.853	0.000665027		0.853	0.0233452
0.854	-0.0253675		0.854	0.000255461		0.854	0.0233083
0.855	-0.0263661		0.855	-0.000185113		0.855	0.0232678
0.856	-0.0273539		0.856	-0.000655372		0.856	0.023224
0.857	-0.0283244		0.857	-0.00115355		0.857	0.0231779
0.858	-0.029271		0.858	-0.00167605		0.858	0.0231299
0.859	-0.0301877		0.859	-0.00221876		0.859	0.0230806
0.86	-0.0310686		0.86	-0.00277793		0.86	0.0230312
0.861	-0.0319081		0.861	-0.0033501		0.861	0.0229827
0.862	-0.0327007		0.862	-0.00393175		0.862	0.0229365
0.863	-0.0334417		0.863	-0.00451921		0.863	0.0228938
0.864	-0.0341278		0.864	-0.00510813		0.864	0.0228552
0.865	-0.0347572		0.865	-0.00569331		0.865	0.0228204
0.866	-0.035328		0.866	-0.00626953		0.866	0.0227899
0.867	-0.0358382		0.867	-0.00683303		0.867	0.0227642
0.868	-0.0362861		0.868	-0.00738051		0.868	0.0227435
0.869	-0.0366709		0.869	-0.00790808		0.869	0.022728
0.87	-0.0369929		0.87	-0.00841119		0.87	0.0227177
0.871	-0.0372538		0.871	-0.00888593		0.871	0.0227123
0.872	-0.0374569		0.872	-0.00932951		0.872	0.0227123
0.873	-0.0376068		0.873	-0.00974003		0.873	0.022718
0.874	-0.0377086		0.874	-0.0101155		0.874	0.0227295
0.875	-0.0377668		0.875	-0.0104534		0.875	0.0227468
0.876	-0.0377858		0.876	-0.0107511		0.876	0.0227702
0.877	-0.0377701		0.877	-0.0110071		0.877	0.0228
0.878	-0.0377239		0.878	-0.0112194		0.878	0.0228364
0.879	-0.0376504		0.879	-0.0113856		0.879	0.0228788
0.88	-0.0375527		0.88	-0.011504		0.88	0.0229262
0.881	-0.0374344		0.881	-0.0115742		0.881	0.0229775
0.882	-0.037299		0.882	-0.0115984		0.882	0.0230312
0.883	-0.0371494		0.883	-0.0115804		0.883	0.0230861
0.884	-0.0369881		0.884	-0.0115239		0.884	0.0231417
0.885	-0.0368168		0.885	-0.0114308		0.885	0.0231982
0.886	-0.0366368		0.886	-0.0113031		0.886	0.0232558
0.887	-0.0364489		0.887	-0.0111432		0.887	0.0233142
0.888	-0.0362544		0.888	-0.0109551		0.888	0.0233735
0.889	-0.0360549		0.889	-0.0107426		0.889	0.0234352
0.89	-0.0358515		0.89	-0.0105099		0.89	0.0235012
0.891	-0.0356443		0.891	-0.0102606		0.891	0.0235728
0.892	-0.0354327		0.892	-0.00999868		0.892	0.0236507
0.893	-0.035217		0.893	-0.00972865		0.893	0.0237346
0.894	-0.0349981		0.894	-0.00945501		0.894	0.023823
0.895	-0.034777		0.895	-0.00918219		0.895	0.023914
0.896	-0.034554		0.896	-0.0089148		0.896	0.0240061
0.897	-0.0343293		0.897	-0.00865793		0.897	0.0240976
0.898	-0.0341027		0.898	-0.00841677		0.898	0.0241872
0.899	-0.0338742		0.899	-0.00819516		0.899	0.0242743
0.9	-0.0336432		0.9	-0.0079956		0.9	0.0243587
0.901	-0.0334084		0.901	-0.00782042		0.901	0.0244401
0.902	-0.0331688		0.902	-0.00767185		0.902	0.0245196
0.903	-0.0329238		0.903	-0.00755098		0.903	0.0245982
0.904	-0.0326727		0.904	-0.00745906		0.904	0.0246769
0.905	-0.0324163		0.905	-0.00739778		0.905	0.0247565
0.906	-0.0321565		0.906	-0.00736802		0.906	0.0248373
0.907	-0.0318944		0.907	-0.00737008		0.907	0.0249191
0.908	-0.0316299		0.908	-0.00740432		0.908	0.025001
0.909	-0.0313642		0.909	-0.00747037		0.909	0.0250825
0.91	-0.0310997		0.91	-0.0075659		0.91	0.0251629
0.911	-0.0308402		0.911	-0.00768743		0.911	0.0252407
0.912	-0.0305896		0.912	-0.00783167		0.912	0.0253142
0.913	-0.030352		0.913	-0.00799633		0.913	0.0253829
0.914	-0.0301307		0.914	-0.008179		0.914	0.0254474
0.915	-0.0299298		0.915	-0.00837753		0.915	0.0255079
0.916	-0.0297544		0.916	-0.00858952		0.916	0.025564
0.917	-0.0296096		0.917	-0.00881179		0.917	0.0256156
0.918	-0.0294998		0.918	-0.00904155		0.918	0.0256633
0.919	-0.0294295		0.919	-0.00927639		0.919	0.0257081
0.92	-0.0294028		0.92	-0.00951299		0.92	0.0257506
0.921	-0.0294234		0.921	-0.00974856		0.921	0.0257904
0.922	-0.0294947		0.922	-0.00998097		0.922	0.0258273
0.923	-0.0296185		0.923	-0.0102078		0.923	0.0258608
0.924	-0.0297956		0.924	-0.0104271		0.924	0.0258904
0.925	-0.0300262		0.925	-0.0106383		0.925	0.0259158
0.926	-0.0303106		0.926	-0.0108417		0.926	0.0259368
0.927	-0.0306493		0.927	-0.0110366		0.927	0.0259537
0.928	-0.0310428		0.928	-0.0112221		0.928	0.0259667
0.929	-0.0314914		0.929	-0.0113973		0.929	0.0259759
0.93	-0.0319928		0.93	-0.0115615		0.93	0.0259816
0.931	-0.032543		0.931	-0.011715		0.931	0.0259843
0.932	-0.0331377		0.932	-0.0118594		0.932	0.0259852
0.933	-0.033774		0.933	-0.0119962		0.933	0.0259858
0.934	-0.0344483		0.934	-0.012127		0.934	0.0259871
0.935	-0.0351558		0.935	-0.0122537		0.935	0.0259889
0.936	-0.035892		0.936	-0.0123785		0.936	0.0259905
0.937	-0.0366545		0.937	-0.0125037		0.937	0.0259909
0.938	-0.0374415		0.938	-0.0126324		0.938	0.0259896
0.939	-0.038251		0.939	-0.0127685		0.939	0.0259858
0.94	-0.0390802		0.94	-0.012916		0.94	0.0259794
0.941	-0.0399274		0.941	-0.0130789		0.941	0.0259706
0.942	-0.0407907		0.942	-0.0132614		0.942	0.0259591
0.943	-0.0416678		0.943	-0.0134677		0.943	0.025944
0.944	-0.0425567		0.944	-0.0137013		0.944	0.0259258
0.945	-0.0434574		0.945	-0.0139648		0.945	0.025906
0.946	-0.0443712		0.946	-0.0142607		0.946	0.0258863
0.947	-0.0452986		0.947	-0.014591		0.947	0.0258674
0.948	-0.0462384		0.948	-0.0149581		0.948	0.0258495
0.949	-0.0471892		0.949	-0.0153636		0.949	0.0258326
0.95	-0.0481496		0.95	-0.0158092		0.95	0.0258163
0.951	-0.0491182		0.951	-0.016295		0.951	0.0257993
0.952	-0.0500926		0.952	-0.01682		0.952	0.02578
0.953	-0.0510709		0.953	-0.0173826		0.953	0.0257565
0.954	-0.0520518		0.954	-0.017981		0.954	0.0257271
0.955	-0.0530343		0.955	-0.0186137		0.955	0.0256909
0.956	-0.0540169		0.956	-0.0192787		0.956	0.0256472
0.957	-0.0549973		0.957	-0.0199729		0.957	0.0255948
0.958	-0.0559732		0.958	-0.0206936		0.958	0.0255333
0.959	-0.0569426		0.959	-0.0214386		0.959	0.0254634
0.96	-0.0579034		0.96	-0.0222045		0.96	0.0253868
0.961	-0.0588535		0.961	-0.0229869		0.961	0.0253038
0.962	-0.0597908		0.962	-0.0237812		0.962	0.0252147
0.963	-0.0607131		0.963	-0.024584		0.963	0.0251204
0.964	-0.0616182		0.964	-0.0253924		0.964	0.0250214
0.965	-0.0625043		0.965	-0.026202		0.965	0.024918
0.966	-0.0633694		0.966	-0.0270068		0.966	0.0248101
0.967	-0.0642116		0.967	-0.0278013		0.967	0.0246978
0.968	-0.0650291		0.968	-0.0285821		0.968	0.0245805
0.969	-0.0658202		0.969	-0.0293466		0.969	0.024458
0.97	-0.0665834		0.97	-0.0300919		0.97	0.0243308
0.971	-0.0673171		0.971	-0.0308147		0.971	0.0241993
0.972	-0.0680192		0.972	-0.0315119		0.972	0.0240644
0.973	-0.0686858		0.973	-0.0321804		0.973	0.0239274
0.974	-0.0693127		0.974	-0.0328175		0.974	0.0237902
0.975	-0.0698966		0.975	-0.033422		0.975	0.0236539
0.976	-0.0704345		0.976	-0.0339935		0.976	0.0235196
0.977	-0.0709235		0.977	-0.0345315		0.977	0.0233884
0.978	-0.0713615		0.978	-0.0350365		0.978	0.0232604
0.979	-0.0717469		0.979	-0.0355092		0.979	0.0231348
0.98	-0.0720779		0.98	-0.0359502		0.98	0.0230109
0.981	-0.0723527		0.981	-0.03636		0.981	0.0228877
0.982	-0.0725701		0.982	-0.0367391		0.982	0.0227639
0.983	-0.0727296		0.983	-0.0370884		0.983	0.0226384
0.984	-0.0728306		0.984	-0.0374087		0.984	0.0225113
0.985	-0.0728721		0.985	-0.0377017		0.985	0.0223833
0.986	-0.0728535		0.986	-0.0379686		0.986	0.0222549
0.987	-0.0727755		0.987	-0.0382109		0.987	0.0221262
0.988	-0.0726397		0.988	-0.0384309		0.988	0.0219975
0.989	-0.0724463		0.989	-0.0386318		0.989	0.0218693
0.99	-0.0721945		0.99	-0.0388172		0.99	0.021742
0.991	-0.0718834		0.991	-0.0389894		0.991	0.021616
0.992	-0.0715117		0.992	-0.0391505		0.992	0.0214916
0.993	-0.0710771		0.993	-0.0393017		0.993	0.0213682
0.994	-0.0705761		0.994	-0.0394439		0.994	0.0212456
0.995	-0.0700048		0.995	-0.0395778		0.995	0.0211237
0.996	-0.0693586		0.996	-0.0397037		0.996	0.0210022
0.997	-0.0686334		0.997	-0.0398217		0.997	0.0208808
0.998	-0.0678266		0.998	-0.0399318		0.998	0.0207593
0.999	-0.066936		0.999	-0.0400344		0.999	0.0206382
1	-0.0659605		1	-0.0401297		1	0.0205182
1.001	-0.0648999		1.001	-0.0402162		1.001	0.0204004
1.002	-0.0637547		1.002	-0.040291		1.002	0.0202852
1.003	-0.0625249		1.003	-0.0403513		1.003	0.0201724
1.004	-0.0612112		1.004	-0.0403961		1.004	0.0200613
1.005	-0.0598151		1.005	-0.0404252		1.005	0.0199503
1.006	-0.0583402		1.006	-0.0404393		1.006	0.0198371
1.007	-0.0567919		1.007	-0.0404382		1.007	0.0197206
1.008	-0.0551766		1.008	-0.0404219		1.008	0.0196002
1.009	-0.0535012		1.009	-0.0403905		1.009	0.0194759
1.01	-0.0517718		1.01	-0.0403436		1.01	0.019348
1.011	-0.0499942		1.011	-0.0402804		1.011	0.0192175
1.012	-0.0481748		1.012	-0.0402001		1.012	0.019086
1.013	-0.0463205		1.013	-0.0401021		1.013	0.0189551
1.014	-0.0444371		1.014	-0.0399867		1.014	0.0188257
1.015	-0.0425294		1.015	-0.0398545		1.015	0.0186988
1.016	-0.0406029		1.016	-0.039706		1.016	0.0185761
1.017	-0.0386642		1.017	-0.0395418		1.017	0.0184596
1.018	-0.0367192		1.018	-0.0393629		1.018	0.0183506
1.019	-0.034773		1.019	-0.0391707		1.019	0.01825
1.02	-0.0328313		1.02	-0.0389668		1.02	0.0181588
1.021	-0.0309005		1.021	-0.0387527		1.021	0.0180775
1.022	-0.0289877		1.022	-0.0385295		1.022	0.0180057
1.023	-0.0270995		1.023	-0.0382985		1.023	0.0179426
1.024	-0.025242		1.024	-0.038062		1.024	0.0178888
1.025	-0.0234206		1.025	-0.0378217		1.025	0.0178451
1.026	-0.0216407		1.026	-0.037581		1.026	0.0178115
1.027	-0.0199083		1.027	-0.0373445		1.027	0.0177878
1.028	-0.0182297		1.028	-0.0371169		1.028	0.0177743
1.029	-0.0166116		1.029	-0.0369021		1.029	0.0177713
1.03	-0.0150613		1.03	-0.0367033		1.03	0.0177784
1.031	-0.0135866		1.031	-0.0365235		1.031	0.0177946
1.032	-0.0121951		1.032	-0.0363667		1.032	0.0178191
1.033	-0.0108932		1.033	-0.0362379		1.033	0.0178511
1.034	-0.00968629		1.034	-0.036142		1.034	0.0178898
1.035	-0.00857963		1.035	-0.0360832		1.035	0.017934
1.036	-0.00757814		1.036	-0.0360653		1.036	0.0179821
1.037	-0.00668649		1.037	-0.0360922		1.037	0.0180334
1.038	-0.00590801		1.038	-0.0361681		1.038	0.0180878
1.039	-0.00524465		1.039	-0.0362963		1.039	0.0181455
1.04	-0.00469769		1.04	-0.0364808		1.04	0.0182059
1.041	-0.00426719		1.041	-0.0367249		1.041	0.0182679
1.042	-0.00395078		1.042	-0.0370311		1.042	0.018332
1.043	-0.00374405		1.043	-0.0373998		1.043	0.018399
1.044	-0.00364163		1.044	-0.0378301		1.044	0.0184693
1.045	-0.00363678		1.045	-0.0383196		1.045	0.0185428
1.046	-0.00372047		1.046	-0.0388645		1.046	0.0186192
1.047	-0.00388095		1.047	-0.0394591		1.047	0.0186981
1.048	-0.00410409		1.048	-0.0400965		1.048	0.0187784
1.049	-0.00437445		1.049	-0.0407682		1.049	0.0188592
1.05	-0.00467599		1.05	-0.0414644		1.05	0.0189388
1.051	-0.00499241		1.051	-0.0421739		1.051	0.019016
1.052	-0.00530799		1.052	-0.0428838		1.052	0.0190904
1.053	-0.00560869		1.053	-0.0435789		1.053	0.0191625
1.054	-0.00588265		1.054	-0.0442428		1.054	0.0192324
1.055	-0.00611896		1.055	-0.0448595		1.055	0.0193
1.056	-0.0063057		1.056	-0.0454139		1.056	0.0193662
1.057	-0.00643056		1.057	-0.0458928		1.057	0.0194315
1.058	-0.00648394		1.058	-0.0462827		1.058	0.0194966
1.059	-0.00646001		1.059	-0.04657		1.059	0.0195627
1.06	-0.00635537		1.06	-0.0467423		1.06	0.0196304
1.061	-0.00616825		1.061	-0.0467883		1.061	0.0196999
1.062	-0.00589799		1.062	-0.0466978		1.062	0.0197714
1.063	-0.0055447		1.063	-0.046463		1.063	0.0198445
1.064	-0.00510885		1.064	-0.0460778		1.064	0.0199189
1.065	-0.00459063		1.065	-0.0455377		1.065	0.0199937
1.066	-0.00399073		1.066	-0.0448396		1.066	0.0200692
1.067	-0.00331166		1.067	-0.043981		1.067	0.0201467
1.068	-0.00255765		1.068	-0.0429609		1.068	0.0202271
1.069	-0.00173332		1.069	-0.0417792		1.069	0.0203104
1.07	-0.000843482		1.07	-0.0404377		1.07	0.0203982
1.071	0.000106312		1.071	-0.0389386		1.071	0.0204924
1.072	0.00110982		1.072	-0.0372852		1.072	0.0205944
1.073	0.00216079		1.073	-0.0354816		1.073	0.0207054
1.074	0.00325342		1.074	-0.0335329		1.074	0.0208266
1.075	0.00438177		1.075	-0.0314456		1.075	0.0209592
1.076	0.00553949		1.076	-0.0292267		1.076	0.0211035
1.077	0.00672013		1.077	-0.026884		1.077	0.0212592
1.078	0.00791697		1.078	-0.0244255		1.078	0.0214262
1.079	0.0091233		1.079	-0.0218582		1.079	0.0216044
1.08	0.010333		1.08	-0.0191884		1.08	0.0217938
1.081	0.0115413		1.081	-0.0164236		1.081	0.0219943
1.082	0.0127438		1.082	-0.0135711		1.082	0.0222058
1.083	0.0139359		1.083	-0.010638		1.083	0.022429
1.084	0.0151124		1.084	-0.00763063		1.084	0.0226649
1.085	0.0162688		1.085	-0.00455455		1.085	0.0229143
1.086	0.0174014		1.086	-0.0014144		1.086	0.0231779
1.087	0.0185065		1.087	0.00178571		1.087	0.0234566
1.088	0.019581		1.088	0.00504108		1.088	0.0237509
1.089	0.0206235		1.089	0.00834589		1.089	0.0240611
1.09	0.0216338		1.09	0.0116944		1.09	0.0243874
1.091	0.0226147		1.091	0.0150815		1.091	0.0247283
1.092	0.0235714		1.092	0.0185041		1.092	0.0250818
1.093	0.0245116		1.093	0.0219598		1.093	0.0254457
1.094	0.0254443		1.094	0.0254457		1.094	0.0258186
1.095	0.0263797		1.095	0.0289579		1.095	0.0261993
1.096	0.0273276		1.096	0.0324932		1.096	0.026587
1.097	0.0282963		1.097	0.0360486		1.097	0.0269812
1.098	0.029291		1.098	0.0396207		1.098	0.027381
1.099	0.0303152		1.099	0.0432057		1.099	0.0277856
1.1	0.0313729		1.1	0.0468003		1.1	0.0281941
1.101	0.0324701		1.101	0.0504007		1.101	0.028606
1.102	0.033615		1.102	0.0540029		1.102	0.029021
1.103	0.0348168		1.103	0.0576035		1.103	0.0294378
1.104	0.0360839		1.104	0.0611999		1.104	0.0298543
1.105	0.037423		1.105	0.0647899		1.105	0.0302687
1.106	0.0388382		1.106	0.0683714		1.106	0.0306803
1.107	0.0403361		1.107	0.0719429		1.107	0.0310893
1.108	0.0419357		1.108	0.0755046		1.108	0.0314959
1.109	0.0436796		1.109	0.0790619		1.109	0.0319004
1.11	0.0456378		1.11	0.082626		1.11	0.0323022
1.111	0.047901		1.111	0.0862129		1.111	0.0326998
1.112	0.050572		1.112	0.0898452		1.112	0.0330917
1.113	0.0537584		1.113	0.0935572		1.113	0.0334762
1.114	0.057567		1.114	0.0973995		1.114	0.0338518
1.115	0.0620996		1.115	0.101439		1.115	0.0342181
1.116	0.0674484		1.116	0.105758		1.116	0.0345755
1.117	0.0736952		1.117	0.110444		1.117	0.0349242
1.118	0.0809119		1.118	0.115588		1.118	0.0352638
1.119	0.0891589		1.119	0.12128		1.119	0.0355937
1.12	0.0984844		1.12	0.127605		1.12	0.035913
1.121	0.108925		1.121	0.13464		1.121	0.0362206
1.122	0.120506		1.122	0.142452		1.122	0.0365159
1.123	0.133242		1.123	0.151099		1.123	0.0367992
1.124	0.147137		1.124	0.160626		1.124	0.0370714
1.125	0.162185		1.125	0.171072		1.125	0.037334
1.126	0.178371		1.126	0.182465		1.126	0.0375894
1.127	0.195668		1.127	0.194822		1.127	0.0378398
1.128	0.214042		1.128	0.208148		1.128	0.0380864
1.129	0.233452		1.129	0.222439		1.129	0.0383289
1.13	0.253848		1.13	0.23768		1.13	0.0385676
1.131	0.275174		1.131	0.253847		1.131	0.0388038
1.132	0.297368		1.132	0.270909		1.132	0.0390401
1.133	0.320359		1.133	0.288826		1.133	0.0392782
1.134	0.344073		1.134	0.307549		1.134	0.0395194
1.135	0.368427		1.135	0.327024		1.135	0.0397646
1.136	0.393338		1.136	0.347187		1.136	0.0400158
1.137	0.418719		1.137	0.367975		1.137	0.0402755
1.138	0.444484		1.138	0.389318		1.138	0.0405457
1.139	0.470544		1.139	0.411145		1.139	0.0408286
1.14	0.496807		1.14	0.433379		1.14	0.0411256
1.141	0.523184		1.141	0.455945		1.141	0.0414384
1.142	0.549583		1.142	0.478764		1.142	0.0417687
1.143	0.575915		1.143	0.501757		1.143	0.0421182
1.144	0.602089		1.144	0.524841		1.144	0.042488
1.145	0.628014		1.145	0.547935		1.145	0.0428782
1.146	0.653604		1.146	0.570957		1.146	0.043289
1.147	0.678774		1.147	0.593826		1.147	0.0437209
1.148	0.703444		1.148	0.616464		1.148	0.0441741
1.149	0.727535		1.149	0.638789		1.149	0.0446485
1.15	0.750969		1.15	0.660727		1.15	0.0451431
1.151	0.773675		1.151	0.682203		1.151	0.0456557
1.152	0.795581		1.152	0.703145		1.152	0.0461828
1.153	0.81662		1.153	0.723485		1.153	0.0467213
1.154	0.83673		1.154	0.743162		1.154	0.047269
1.155	0.855852		1.155	0.762116		1.155	0.0478243
1.156	0.873933		1.156	0.780295		1.156	0.0483848
1.157	0.890925		1.157	0.797645		1.157	0.0489475
1.158	0.906784		1.158	0.814122		1.158	0.0495093
1.159	0.92147		1.159	0.829684		1.159	0.0500681
1.16	0.934951		1.16	0.844296		1.16	0.0506214
1.161	0.947197		1.161	0.857924		1.161	0.0511671
1.162	0.958185		1.162	0.870544		1.162	0.0517036
1.163	0.9679		1.163	0.882133		1.163	0.0522274
1.164	0.976331		1.164	0.892676		1.164	0.0527349
1.165	0.983472		1.165	0.902158		1.165	0.053224
1.166	0.989323		1.166	0.910574		1.166	0.0536926
1.167	0.99389		1.167	0.917921		1.167	0.054137
1.168	0.997181		1.168	0.924199		1.168	0.0545532
1.169	0.999212		1.169	0.92941		1.169	0.0549383
1.17	1		1.17	0.933563		1.17	0.0552901
1.171	0.999565		1.171	0.936669		1.171	0.0556074
1.172	0.997935		1.172	0.938741		1.172	0.0558893
1.173	0.995138		1.173	0.939799		1.173	0.0561347
1.174	0.991208		1.174	0.939866		1.174	0.0563433
1.175	0.986181		1.175	0.938964		1.175	0.0565156
1.176	0.980096		1.176	0.937122		1.176	0.0566515
1.177	0.972994		1.177	0.934369		1.177	0.0567504
1.178	0.96492		1.178	0.930737		1.178	0.0568111
1.179	0.955919		1.179	0.926259		1.179	0.0568334
1.18	0.946037		1.18	0.920967		1.18	0.0568178
1.181	0.935323		1.181	0.914898		1.181	0.0567643
1.182	0.923825		1.182	0.908088		1.182	0.0566722
1.183	0.911597		1.183	0.900577		1.183	0.0565407
1.184	0.898689		1.184	0.892405		1.184	0.056371
1.185	0.885155		1.185	0.883609		1.185	0.0561649
1.186	0.871045		1.186	0.87423		1.186	0.0559243
1.187	0.856414		1.187	0.864306		1.187	0.0556508
1.188	0.841313		1.188	0.853877		1.188	0.0553463
1.189	0.825794		1.189	0.842982		1.189	0.0550128
1.19	0.809911		1.19	0.831662		1.19	0.0546525
1.191	0.793714		1.191	0.819955		1.191	0.0542676
1.192	0.777251		1.192	0.807896		1.192	0.0538594
1.193	0.76057		1.193	0.795525		1.193	0.053429
1.194	0.743717		1.194	0.782876		1.194	0.0529774
1.195	0.726736		1.195	0.769984		1.195	0.0525053
1.196	0.709671		1.196	0.756884		1.196	0.052013
1.197	0.692563		1.197	0.743608		1.197	0.0515009
1.198	0.675456		1.198	0.730186		1.198	0.0509694
1.199	0.658389		1.199	0.716654		1.199	0.0504198
1.2	0.641398		1.2	0.703041		1.2	0.0498536
1.201	0.62452		1.201	0.689382		1.201	0.049272
1.202	0.607786		1.202	0.675704		1.202	0.0486766
1.203	0.591229		1.203	0.66204		1.203	0.0480694
1.204	0.57488		1.204	0.648417		1.204	0.0474531
1.205	0.558769		1.205	0.634859		1.205	0.04683
1.206	0.542922		1.206	0.621392		1.206	0.0462026
1.207	0.527365		1.207	0.60804		1.207	0.045573
1.208	0.51212		1.208	0.594826		1.208	0.044943
1.209	0.49721		1.209	0.581772		1.209	0.0443138
1.21	0.482654		1.21	0.568898		1.21	0.043687
1.211	0.468469		1.211	0.556221		1.211	0.0430639
1.212	0.45467		1.212	0.543762		1.212	0.0424458
1.213	0.441273		1.213	0.531537		1.213	0.0418339
1.214	0.428289		1.214	0.519562		1.214	0.0412297
1.215	0.415729		1.215	0.507852		1.215	0.0406339
1.216	0.403601		1.216	0.49642		1.216	0.0400482
1.217	0.391909		1.217	0.485277		1.217	0.0394738
1.218	0.380658		1.218	0.474433		1.218	0.0389116
1.219	0.369851		1.219	0.463893		1.219	0.0383626
1.22	0.359491		1.22	0.453665		1.22	0.0378281
1.221	0.349578		1.221	0.443755		1.221	0.0373091
1.222	0.34011		1.222	0.434166		1.222	0.0368065
1.223	0.331085		1.223	0.424901		1.223	0.0363211
1.224	0.322499		1.224	0.415964		1.224	0.0358536
1.225	0.314349		1.225	0.407355		1.225	0.0354044
1.226	0.306631		1.226	0.399075		1.226	0.0349743
1.227	0.299339		1.227	0.391122		1.227	0.0345643
1.228	0.292464		1.228	0.383495		1.228	0.0341744
1.229	0.285997		1.229	0.376191		1.229	0.0338043
1.23	0.279928		1.23	0.369208		1.23	0.0334543
1.231	0.274246		1.231	0.362541		1.231	0.033125
1.232	0.268939		1.232	0.356189		1.232	0.0328168
1.233	0.263996		1.233	0.350146		1.233	0.0325294
1.234	0.259405		1.234	0.344409		1.234	0.0322619
1.235	0.255154		1.235	0.33897		1.235	0.0320131
1.236	0.25123		1.236	0.333822		1.236	0.0317825
1.237	0.247623		1.237	0.328957		1.237	0.0315697
1.238	0.244317		1.238	0.324367		1.238	0.0313745
1.239	0.2413		1.239	0.320043		1.239	0.0311963
1.24	0.238556		1.24	0.315976		1.24	0.0310349
1.241	0.236073		1.241	0.312157		1.241	0.0308905
1.242	0.233839		1.242	0.308577		1.242	0.0307626
1.243	0.231838		1.243	0.305229		1.243	0.0306506
1.244	0.230056		1.244	0.302104		1.244	0.0305543
1.245	0.22848		1.245	0.299194		1.245	0.0304733
1.246	0.227099		1.246	0.296489		1.246	0.0304076
1.247	0.225899		1.247	0.293977		1.247	0.030357
1.248	0.224869		1.248	0.291649		1.248	0.0303212
1.249	0.223995		1.249	0.289496		1.249	0.0302995
1.25	0.223265		1.25	0.287508		1.25	0.0302925
1.251	0.22267		1.251	0.285676		1.251	0.0303009
1.252	0.222197		1.252	0.283992		1.252	0.0303245
1.253	0.221835		1.253	0.282445		1.253	0.0303617
1.254	0.221575		1.254	0.281025		1.254	0.0304114
1.255	0.221404		1.255	0.279722		1.255	0.0304728
1.256	0.221313		1.256	0.278527		1.256	0.0305451
1.257	0.221294		1.257	0.27743		1.257	0.0306272
1.258	0.221338		1.258	0.276425		1.258	0.0307181
1.259	0.221435		1.259	0.275501		1.259	0.0308171
1.26	0.221578		1.26	0.274649		1.26	0.0309236
1.261	0.221755		1.261	0.273862		1.261	0.0310371
1.262	0.221957		1.262	0.273134		1.262	0.0311574
1.263	0.222178		1.263	0.272457		1.263	0.0312844
1.264	0.222411		1.264	0.271824		1.264	0.0314181
1.265	0.222651		1.265	0.271229		1.265	0.0315572
1.266	0.222892		1.266	0.270664		1.266	0.0316992
1.267	0.22313		1.267	0.270125		1.267	0.0318422
1.268	0.223359		1.268	0.269605		1.268	0.0319853
1.269	0.223575		1.269	0.269101		1.269	0.0321276
1.27	0.223771		1.27	0.268607		1.27	0.0322684
1.271	0.223943		1.271	0.268118		1.271	0.0324072
1.272	0.224087		1.272	0.26763		1.272	0.0325437
1.273	0.224202		1.273	0.267137		1.273	0.0326773
1.274	0.224283		1.274	0.266635		1.274	0.0328077
1.275	0.22433		1.275	0.266119		1.275	0.0329348
1.276	0.224341		1.276	0.265586		1.276	0.0330583
1.277	0.224313		1.277	0.265032		1.277	0.0331773
1.278	0.224245		1.278	0.264456		1.278	0.0332911
1.279	0.224137		1.279	0.263854		1.279	0.0333988
1.28	0.223988		1.28	0.263224		1.28	0.0334998
1.281	0.223796		1.281	0.262565		1.281	0.0335936
1.282	0.22356		1.282	0.261874		1.282	0.0336793
1.283	0.223279		1.283	0.26115		1.283	0.0337562
1.284	0.222955		1.284	0.260391		1.284	0.0338234
1.285	0.222587		1.285	0.259595		1.285	0.0338795
1.286	0.222175		1.286	0.258763		1.286	0.0339228
1.287	0.22172		1.287	0.257894		1.287	0.0339528
1.288	0.221223		1.288	0.25699		1.288	0.0339696
1.289	0.220684		1.289	0.256049		1.289	0.0339742
1.29	0.220105		1.29	0.25507		1.29	0.033968
1.291	0.219484		1.291	0.254055		1.291	0.0339517
1.292	0.218822		1.292	0.253004		1.292	0.0339252
1.293	0.21812		1.293	0.251916		1.293	0.0338886
1.294	0.217381		1.294	0.250792		1.294	0.0338423
1.295	0.216604		1.295	0.24963		1.295	0.033787
1.296	0.21579		1.296	0.248434		1.296	0.0337237
1.297	0.214941		1.297	0.247205		1.297	0.0336522
1.298	0.214059		1.298	0.245943		1.298	0.0335729
1.299	0.213147		1.299	0.24465		1.299	0.0334859
1.3	0.212209		1.3	0.243326		1.3	0.0333918
1.301	0.211248		1.301	0.24197		1.301	0.0332907
1.302	0.210266		1.302	0.240585		1.302	0.0331828
1.303	0.209265		1.303	0.239171		1.303	0.0330683
1.304	0.208249		1.304	0.237732		1.304	0.0329485
1.305	0.207218		1.305	0.236269		1.305	0.0328254
1.306	0.206175		1.306	0.234784		1.306	0.032701
1.307	0.205121		1.307	0.233279		1.307	0.0325762
1.308	0.20406		1.308	0.231753		1.308	0.0324514
1.309	0.202994		1.309	0.23021		1.309	0.032327
1.31	0.201926		1.31	0.228652		1.31	0.032204
1.311	0.200857		1.311	0.227081		1.311	0.0320845
1.312	0.199789		1.312	0.225499		1.312	0.0319703
1.313	0.198723		1.313	0.223909		1.313	0.0318613
1.314	0.197661		1.314	0.222311		1.314	0.0317564
1.315	0.196603		1.315	0.22071		1.315	0.0316551
1.316	0.195551		1.316	0.219104		1.316	0.0315577
1.317	0.194506		1.317	0.217495		1.317	0.0314646
1.318	0.193468		1.318	0.215887		1.318	0.0313763
1.319	0.192439		1.319	0.214282		1.319	0.0312927
1.32	0.19142		1.32	0.212684		1.32	0.0312142
1.321	0.19041		1.321	0.211096		1.321	0.0311414
1.322	0.189409		1.322	0.20952		1.322	0.0310751
1.323	0.188419		1.323	0.207959		1.323	0.031015
1.324	0.187438		1.324	0.206416		1.324	0.030961
1.325	0.186465		1.325	0.20489		1.325	0.030914
1.326	0.185501		1.326	0.203386		1.326	0.0308752
1.327	0.184547		1.327	0.201903		1.327	0.0308456
1.328	0.183604		1.328	0.200442		1.328	0.0308252
1.329	0.182673		1.329	0.199005		1.329	0.0308138
1.33	0.181754		1.33	0.197594		1.33	0.0308115
1.331	0.180848		1.331	0.196211		1.331	0.0308187
1.332	0.179954		1.332	0.194857		1.332	0.0308357
1.333	0.179072		1.333	0.193531		1.333	0.0308622
1.334	0.178201		1.334	0.192235		1.334	0.0308984
1.335	0.17734		1.335	0.190968		1.335	0.0309445
1.336	0.176489		1.336	0.189731		1.336	0.0310014
1.337	0.175647		1.337	0.188522		1.337	0.0310694
1.338	0.174815		1.338	0.187339		1.338	0.0311477
1.339	0.173991		1.339	0.186181		1.339	0.0312356
1.34	0.173175		1.34	0.185048		1.34	0.0313317
1.341	0.172367		1.341	0.183941		1.341	0.0314347
1.342	0.171567		1.342	0.182859		1.342	0.0315439
1.343	0.170775		1.343	0.181802		1.343	0.0316592
1.344	0.16999		1.344	0.180767		1.344	0.0317793
1.345	0.169211		1.345	0.179754		1.345	0.0319028
1.346	0.168441		1.346	0.178764		1.346	0.032028
1.347	0.167679		1.347	0.177795		1.347	0.0321536
1.348	0.166927		1.348	0.176846		1.348	0.0322788
1.349	0.166183		1.349	0.175917		1.349	0.032403
1.35	0.165447		1.35	0.175007		1.35	0.0325256
1.351	0.16472		1.351	0.174114		1.351	0.0326453
1.352	0.164001		1.352	0.173238		1.352	0.032761
1.353	0.163291		1.353	0.172379		1.353	0.0328724
1.354	0.162589		1.354	0.171536		1.354	0.0329794
1.355	0.161895		1.355	0.170707		1.355	0.0330823
1.356	0.161209		1.356	0.169892		1.356	0.0331825
1.357	0.160533		1.357	0.169088		1.357	0.0332808
1.358	0.159866		1.358	0.168293		1.358	0.0333777
1.359	0.159208		1.359	0.167504		1.359	0.0334732
1.36	0.158558		1.36	0.166722		1.36	0.0335665
1.361	0.157916		1.361	0.165943		1.361	0.0336571
1.362	0.157281		1.362	0.165166		1.362	0.0337441
1.363	0.156654		1.363	0.16439		1.363	0.0338269
1.364	0.156036		1.364	0.163612		1.364	0.0339058
1.365	0.155427		1.365	0.162831		1.365	0.0339813
1.366	0.154827		1.366	0.162046		1.366	0.0340543
1.367	0.154236		1.367	0.161256		1.367	0.034125
1.368	0.153652		1.368	0.160463		1.368	0.0341934
1.369	0.153075		1.369	0.159665		1.369	0.0342589
1.37	0.152505		1.37	0.158861		1.37	0.0343208
1.371	0.151943		1.371	0.158051		1.371	0.0343786
1.372	0.151387		1.372	0.157233		1.372	0.0344319
1.373	0.150838		1.373	0.156406		1.373	0.0344799
1.374	0.150294		1.374	0.155567		1.374	0.0345219
1.375	0.149757		1.375	0.154716		1.375	0.034557
1.376	0.149224		1.376	0.153854		1.376	0.034585
1.377	0.148694		1.377	0.152982		1.377	0.034607
1.378	0.148164		1.378	0.1521		1.378	0.0346245
1.379	0.147634		1.379	0.151209		1.379	0.0346387
1.38	0.147103		1.38	0.150308		1.38	0.0346496
1.381	0.146571		1.381	0.149396		1.381	0.0346571
1.382	0.146037		1.382	0.148471		1.382	0.0346609
1.383	0.1455		1.383	0.147533		1.383	0.0346605
1.384	0.144959		1.384	0.146582		1.384	0.0346551
1.385	0.144416		1.385	0.145622		1.385	0.0346451
1.386	0.143868		1.386	0.144653		1.386	0.0346314
1.387	0.143317		1.387	0.143676		1.387	0.0346142
1.388	0.142764		1.388	0.142691		1.388	0.0345932
1.389	0.142207		1.389	0.1417		1.389	0.0345683
1.39	0.141648		1.39	0.140702		1.39	0.0345402
1.391	0.141086		1.391	0.139701		1.391	0.0345096
1.392	0.140522		1.392	0.138695		1.392	0.0344776
1.393	0.139957		1.393	0.137688		1.393	0.0344448
1.394	0.13939		1.394	0.136681		1.394	0.0344121
1.395	0.138824		1.395	0.135677		1.395	0.0343793
1.396	0.138259		1.396	0.134675		1.396	0.0343459
1.397	0.137696		1.397	0.133677		1.397	0.0343118
1.398	0.137136		1.398	0.132684		1.398	0.0342769
1.399	0.13658		1.399	0.131699		1.399	0.0342408
1.4	0.136028		1.4	0.130724		1.4	0.0342039
1.401	0.135483		1.401	0.129759		1.401	0.0341666
1.402	0.134945		1.402	0.128806		1.402	0.0341288
1.403	0.134415		1.403	0.127867		1.403	0.0340901
1.404	0.133892		1.404	0.126943		1.404	0.0340505
1.405	0.133378		1.405	0.126034		1.405	0.0340097
1.406	0.132874		1.406	0.125143		1.406	0.0339678
1.407	0.132381		1.407	0.124271		1.407	0.0339259
1.408	0.131903		1.408	0.12342		1.408	0.0338854
1.409	0.131438		1.409	0.122593		1.409	0.0338479
1.41	0.130988		1.41	0.121792		1.41	0.0338135
1.411	0.13055		1.411	0.121018		1.411	0.0337811
1.412	0.130125		1.412	0.12027		1.412	0.033749
1.413	0.129713		1.413	0.119549		1.413	0.0337162
1.414	0.129314		1.414	0.118854		1.414	0.0336824
1.415	0.128931		1.415	0.118183		1.415	0.0336474
1.416	0.128564		1.416	0.117538		1.416	0.0336099
1.417	0.128213		1.417	0.116919		1.417	0.0335689
1.418	0.127877		1.418	0.116323		1.418	0.0335238
1.419	0.127559		1.419	0.115752		1.419	0.0334742
1.42	0.127255		1.42	0.115204		1.42	0.0334199
1.421	0.126966		1.421	0.114679		1.421	0.0333616
1.422	0.12669		1.422	0.114176		1.422	0.0333
1.423	0.126424		1.423	0.113693		1.423	0.0332357
1.424	0.126169		1.424	0.113229		1.424	0.0331693
1.425	0.125922		1.425	0.112783		1.425	0.0331014
1.426	0.12568		1.426	0.112353		1.426	0.0330327
1.427	0.125442		1.427	0.111938		1.427	0.0329643
1.428	0.125208		1.428	0.111538		1.428	0.032897
1.429	0.124978		1.429	0.111151		1.429	0.0328308
1.43	0.124751		1.43	0.110776		1.43	0.0327653
1.431	0.124525		1.431	0.110412		1.431	0.0327007
1.432	0.124299		1.432	0.110057		1.432	0.0326377
1.433	0.124071		1.433	0.109712		1.433	0.0325762
1.434	0.123841		1.434	0.109376		1.434	0.0325162
1.435	0.123606		1.435	0.109049		1.435	0.0324585
1.436	0.123366		1.436	0.108729		1.436	0.0324046
1.437	0.12312		1.437	0.108412		1.437	0.0323557
1.438	0.122867		1.438	0.108097		1.438	0.0323124
1.439	0.122608		1.439	0.107781		1.439	0.0322757
1.44	0.122341		1.44	0.107461		1.44	0.0322462
1.441	0.122068		1.441	0.107135		1.441	0.032223
1.442	0.121789		1.442	0.106799		1.442	0.0322051
1.443	0.121503		1.443	0.10645		1.443	0.0321918
1.444	0.121211		1.444	0.106085		1.444	0.0321822
1.445	0.120914		1.445	0.105706		1.445	0.0321752
1.446	0.120611		1.446	0.105311		1.446	0.0321699
1.447	0.120302		1.447	0.104901		1.447	0.0321663
1.448	0.119987		1.448	0.104476		1.448	0.0321645
1.449	0.119669		1.449	0.104035		1.449	0.0321652
1.45	0.119347		1.45	0.10358		1.45	0.0321698
1.451	0.119021		1.451	0.103109		1.451	0.03218
1.452	0.118691		1.452	0.102623		1.452	0.032197
1.453	0.118359		1.453	0.102121		1.453	0.0322209
1.454	0.118026		1.454	0.101604		1.454	0.0322515
1.455	0.117696		1.455	0.101073		1.455	0.0322889
1.456	0.117371		1.456	0.10053		1.456	0.0323332
1.457	0.11705		1.457	0.0999779		1.457	0.0323846
1.458	0.116735		1.458	0.0994181		1.458	0.0324427
1.459	0.116425		1.459	0.0988526		1.459	0.0325064
1.46	0.116118		1.46	0.0982833		1.46	0.0325745
1.461	0.115817		1.461	0.0977116		1.461	0.0326468
1.462	0.11552		1.462	0.0971393		1.462	0.0327229
1.463	0.115232		1.463	0.096568		1.463	0.0328013
1.464	0.114952		1.464	0.0959996		1.464	0.0328812
1.465	0.11468		1.465	0.0954357		1.465	0.0329626
1.466	0.114415		1.466	0.0948775		1.466	0.0330459
1.467	0.114153		1.467	0.0943262		1.467	0.0331311
1.468	0.113895		1.468	0.0937833		1.468	0.0332185
1.469	0.113641		1.469	0.0932502		1.469	0.0333087
1.47	0.113394		1.47	0.0927284		1.47	0.0334025
1.471	0.113155		1.471	0.0922201		1.471	0.0335008
1.472	0.112924		1.472	0.0917271		1.472	0.033605
1.473	0.112702		1.473	0.0912506		1.473	0.0337158
1.474	0.112488		1.474	0.0907912		1.474	0.0338335
1.475	0.112285		1.475	0.0903497		1.475	0.0339584
1.476	0.112092		1.476	0.0899263		1.476	0.0340894
1.477	0.111912		1.477	0.0895203		1.477	0.0342256
1.478	0.111741		1.478	0.0891317		1.478	0.0343667
1.479	0.11158		1.479	0.088761		1.479	0.0345139
1.48	0.111425		1.48	0.0884095		1.48	0.0346687
1.481	0.111277		1.481	0.0880783		1.481	0.0348317
1.482	0.111134		1.482	0.0877684		1.482	0.0350035
1.483	0.110996		1.483	0.087479		1.483	0.0351843
1.484	0.110862		1.484	0.0872075		1.484	0.0353733
1.485	0.110732		1.485	0.0869522		1.485	0.0355694
1.486	0.110605		1.486	0.0867128		1.486	0.0357721
1.487	0.110479		1.487	0.0864896		1.487	0.0359812
1.488	0.110354		1.488	0.0862816		1.488	0.036196
1.489	0.110229		1.489	0.0860872		1.489	0.036416
1.49	0.110105		1.49	0.085905		1.49	0.0366408
1.491	0.109982		1.491	0.0857331		1.491	0.0368702
1.492	0.109858		1.492	0.0855703		1.492	0.0371037
1.493	0.109734		1.493	0.0854151		1.493	0.0373409
1.494	0.109608		1.494	0.0852663		1.494	0.037582
1.495	0.109481		1.495	0.0851226		1.495	0.0378266
1.496	0.109351		1.496	0.0849827		1.496	0.0380747
1.497	0.10922		1.497	0.0848453		1.497	0.0383255
1.498	0.109088		1.498	0.0847096		1.498	0.0385779
1.499	0.108955		1.499	0.0845751		1.499	0.0388316
1.5	0.108822		1.5	0.0844415		1.5	0.0390866
1.501	0.10869		1.501	0.0843085		1.501	0.0393428
1.502	0.108561		1.502	0.0841771		1.502	0.0396003
1.503	0.108435		1.503	0.0840479		1.503	0.0398595
1.504	0.108311		1.504	0.0839218		1.504	0.0401205
1.505	0.10819		1.505	0.0837996		1.505	0.0403833
1.506	0.108072		1.506	0.0836829		1.506	0.0406474
1.507	0.107956		1.507	0.0835738		1.507	0.0409119
1.508	0.107842		1.508	0.0834746		1.508	0.0411768
1.509	0.10773		1.509	0.0833876		1.509	0.041443
1.51	0.10762		1.51	0.0833136		1.51	0.0417117
1.511	0.107513		1.511	0.0832531		1.511	0.041985
1.512	0.10741		1.512	0.0832052		1.512	0.042265
1.513	0.10731		1.513	0.0831694		1.513	0.042553
1.514	0.107214		1.514	0.0831465		1.514	0.0428486
1.515	0.107123		1.515	0.0831383		1.515	0.0431505
1.516	0.107036		1.516	0.0831468		1.516	0.0434569
1.517	0.106955		1.517	0.0831735		1.517	0.0437669
1.518	0.106878		1.518	0.0832193		1.518	0.0440805
1.519	0.106805		1.519	0.0832852		1.519	0.0443984
1.52	0.106736		1.52	0.0833716		1.52	0.0447209
1.521	0.10667		1.521	0.0834787		1.521	0.0450478
1.522	0.106606		1.522	0.0836075		1.522	0.0453784
1.523	0.106544		1.523	0.083759		1.523	0.0457117
1.524	0.106482		1.524	0.083934		1.524	0.0460468
1.525	0.10642		1.525	0.0841334		1.525	0.0463829
1.526	0.106357		1.526	0.0843581		1.526	0.0467194
1.527	0.106294		1.527	0.0846066		1.527	0.047055
1.528	0.106233		1.528	0.0848765		1.528	0.0473877
1.529	0.106174		1.529	0.0851661		1.529	0.0477145
1.53	0.106117		1.53	0.0854749		1.53	0.0480319
1.531	0.106063		1.531	0.0858003		1.531	0.0483366
1.532	0.106008		1.532	0.0861389		1.532	0.0486258
1.533	0.105951		1.533	0.0864877		1.533	0.0488976
1.534	0.105892		1.534	0.0868435		1.534	0.0491505
1.535	0.105831		1.535	0.0872031		1.535	0.0493841
1.536	0.105767		1.536	0.0875631		1.536	0.0495991
1.537	0.1057		1.537	0.0879203		1.537	0.0497977
1.538	0.105629		1.538	0.0882723		1.538	0.0499826
1.539	0.105555		1.539	0.0886157		1.539	0.0501564
1.54	0.105477		1.54	0.0889471		1.54	0.0503203
1.541	0.105395		1.541	0.0892637		1.541	0.0504736
1.542	0.105306		1.542	0.0895633		1.542	0.0506143
1.543	0.105212		1.543	0.0898422		1.543	0.0507398
1.544	0.105111		1.544	0.0900975		1.544	0.0508485
1.545	0.105006		1.545	0.0903272		1.545	0.0509392
1.546	0.104898		1.546	0.0905304		1.546	0.0510111
1.547	0.104787		1.547	0.0907058		1.547	0.0510641
1.548	0.104674		1.548	0.0908509		1.548	0.0510989
1.549	0.104558		1.549	0.0909635		1.549	0.0511156
1.55	0.104442		1.55	0.0910424		1.55	0.0511137
1.551	0.104325		1.551	0.091087		1.551	0.0510923
1.552	0.10421		1.552	0.0910975		1.552	0.0510514
1.553	0.104098		1.553	0.0910748		1.553	0.0509923
1.554	0.103989		1.554	0.0910206		1.554	0.0509178
1.555	0.103884		1.555	0.0909372		1.555	0.0508311
1.556	0.103785		1.556	0.0908268		1.556	0.0507341
1.557	0.103691		1.557	0.0906918		1.557	0.0506265
1.558	0.103603		1.558	0.0905342		1.558	0.0505065
1.559	0.10352		1.559	0.0903555		1.559	0.0503733
1.56	0.103441		1.56	0.0901577		1.56	0.0502272
1.561	0.103365		1.561	0.0899437		1.561	0.0500688
1.562	0.103294		1.562	0.0897161		1.562	0.0498989
1.563	0.103228		1.563	0.0894779		1.563	0.0497182
1.564	0.103169		1.564	0.0892322		1.564	0.0495271
1.565	0.103117		1.565	0.0889818		1.565	0.0493261
1.566	0.103073		1.566	0.088729		1.566	0.0491164
1.567	0.103034		1.567	0.0884756		1.567	0.0488994
1.568	0.103001		1.568	0.0882243		1.568	0.0486754
1.569	0.102972		1.569	0.0879786		1.569	0.048444
1.57	0.102947		1.57	0.0877422		1.57	0.0482051
1.571	0.102928		1.571	0.0875176		1.571	0.0479584
1.572	0.102915		1.572	0.0873064		1.572	0.0477024
1.573	0.102907		1.573	0.0871104		1.573	0.0474344
1.574	0.102903		1.574	0.0869311		1.574	0.0471502
1.575	0.102903		1.575	0.0867695		1.575	0.046844
1.576	0.102907		1.576	0.0866264		1.576	0.0465076
1.577	0.102912		1.577	0.0865018		1.577	0.0461336
1.578	0.10292		1.578	0.0863945		1.578	0.0457186
1.579	0.102928		1.579	0.0863029		1.579	0.0452645
1.58	0.102937		1.58	0.0862252		1.58	0.0447766
1.581	0.102945		1.581	0.0861603		1.581	0.0442614
1.582	0.102952		1.582	0.0861065		1.582	0.0437267
1.583	0.102958		1.583	0.0860618		1.583	0.04318
1.584	0.102962		1.584	0.0860245		1.584	0.0426262
1.585	0.102961		1.585	0.0859941		1.585	0.0420689
1.586	0.102956		1.586	0.0859701		1.586	0.0415124
1.587	0.102948		1.587	0.0859523		1.587	0.0409615
1.588	0.102938		1.588	0.0859409		1.588	0.0404208
1.589	0.102924		1.589	0.0859359		1.589	0.039894
1.59	0.102908		1.59	0.0859368		1.59	0.0393828
1.591	0.102888		1.591	0.0859422		1.591	0.0388879
1.592	0.102866		1.592	0.0859511		1.592	0.0384101
1.593	0.102839		1.593	0.0859621		1.593	0.0379507
1.594	0.102808		1.594	0.0859736		1.594	0.0375105
1.595	0.102773		1.595	0.0859842		1.595	0.0370889
1.596	0.102735		1.596	0.0859929		1.596	0.0366845
1.597	0.102695		1.597	0.0859984		1.597	0.0362944
1.598	0.102654		1.598	0.0859994		1.598	0.0359151
1.599	0.10261		1.599	0.0859949		1.599	0.0355433
1.6	0.102564		1.6	0.0859824		1.6	0.0351776
1.601	0.102517		1.601	0.0859594		1.601	0.0348184
1.602	0.10247		1.602	0.0859233		1.602	0.034467
1.603	0.102424		1.603	0.0858735		1.603	0.0341256
1.604	0.10238		1.604	0.0858116		1.604	0.0337975
1.605	0.102338		1.605	0.0857388		1.605	0.0334855
1.606	0.102299		1.606	0.0856546		1.606	0.0331924
1.607	0.102264		1.607	0.0855578		1.607	0.0329209
1.608	0.102233		1.608	0.0854477		1.608	0.032673
1.609	0.102203		1.609	0.0853231		1.609	0.0324498
1.61	0.102175		1.61	0.0851829		1.61	0.0322516
1.611	0.10215		1.611	0.085027		1.611	0.0320779
1.612	0.102127		1.612	0.0848568		1.612	0.0319261
1.613	0.102106		1.613	0.0846739		1.613	0.0317933
1.614	0.102088		1.614	0.0844795		1.614	0.0316776
1.615	0.102072		1.615	0.084274		1.615	0.0315784
1.616	0.102059		1.616	0.0840565		1.616	0.0314957
1.617	0.102045		1.617	0.083825		1.617	0.0314288
1.618	0.102031		1.618	0.0835766		1.618	0.0313764
1.619	0.102014		1.619	0.0833088		1.619	0.0313383
1.62	0.101995		1.62	0.0830186		1.62	0.0313149
1.621	0.101976		1.621	0.0827028		1.621	0.0313062
1.622	0.101957		1.622	0.08236		1.622	0.0313123
1.623	0.101937		1.623	0.0819894		1.623	0.031333
1.624	0.101918		1.624	0.0815916		1.624	0.0313682
1.625	0.1019		1.625	0.0811675		1.625	0.0314175
1.626	0.101883		1.626	0.0807177		1.626	0.0314805
1.627	0.101869		1.627	0.0802423		1.627	0.0315575
1.628	0.101857		1.628	0.0797412		1.628	0.0316487
1.629	0.101846		1.629	0.0792142		1.629	0.0317547
1.63	0.101836		1.63	0.0786624		1.63	0.0318764
1.631	0.101827		1.631	0.0780874		1.631	0.0320146
1.632	0.101818		1.632	0.0774909		1.632	0.032171
1.633	0.101809		1.633	0.0768731		1.633	0.0323467
1.634	0.101798		1.634	0.0762334		1.634	0.0325421
1.635	0.101786		1.635	0.0755721		1.635	0.0327569
1.636	0.10177		1.636	0.0748901		1.636	0.0329908
1.637	0.101751		1.637	0.0741878		1.637	0.0332432
1.638	0.101728		1.638	0.073465		1.638	0.0335134
1.639	0.101701		1.639	0.0727219		1.639	0.0337996
1.64	0.101668		1.64	0.071959		1.64	0.0340986
1.641	0.101631		1.641	0.0711765		1.641	0.0344078
1.642	0.101589		1.642	0.0703744		1.642	0.0347256
1.643	0.101543		1.643	0.0695529		1.643	0.0350508
1.644	0.101494		1.644	0.068712		1.644	0.035383
1.645	0.101442		1.645	0.0678526		1.645	0.0357225
1.646	0.101387		1.646	0.0669769		1.646	0.036069
1.647	0.10133		1.647	0.0660863		1.647	0.0364218
1.648	0.101273		1.648	0.0651817		1.648	0.0367798
1.649	0.101215		1.649	0.0642646		1.649	0.0371416
1.65	0.101159		1.65	0.0633357		1.65	0.0375057
1.651	0.101104		1.651	0.0623954		1.651	0.0378718
1.652	0.101052		1.652	0.0614447		1.652	0.0382411
1.653	0.101003		1.653	0.0604845		1.653	0.0386153
1.654	0.100957		1.654	0.0595164		1.654	0.0389951
1.655	0.100916		1.655	0.0585423		1.655	0.0393804
1.656	0.100878		1.656	0.0575632		1.656	0.039771
1.657	0.100844		1.657	0.0565789		1.657	0.0401661
1.658	0.100814		1.658	0.0555895		1.658	0.0405637
1.659	0.100788		1.659	0.0545958		1.659	0.0409607
1.66	0.100768		1.66	0.0535986		1.66	0.0413535
1.661	0.10075		1.661	0.0525989		1.661	0.0417385
1.662	0.100734		1.662	0.051598		1.662	0.0421121
1.663	0.100718		1.663	0.0505983		1.663	0.0424712
1.664	0.1007		1.664	0.0496022		1.664	0.0428129
1.665	0.100683		1.665	0.0486121		1.665	0.0431351
1.666	0.100666		1.666	0.0476299		1.666	0.0434355
1.667	0.100649		1.667	0.0466582		1.667	0.0437125
1.668	0.100632		1.668	0.0456999		1.668	0.0439652
1.669	0.100614		1.669	0.0447571		1.669	0.0441952
1.67	0.100594		1.67	0.0438304		1.67	0.0444053
1.671	0.100573		1.671	0.0429199		1.671	0.0445984
1.672	0.100547		1.672	0.042026		1.672	0.0447765
1.673	0.100518		1.673	0.0411503		1.673	0.0449416
1.674	0.100487		1.674	0.0402946		1.674	0.0450963
1.675	0.100454		1.675	0.0394597		1.675	0.0452425
1.676	0.100417		1.676	0.038646		1.676	0.0453817
1.677	0.100375		1.677	0.0378534		1.677	0.0455157
1.678	0.100327		1.678	0.0370815		1.678	0.0456458
1.679	0.100271		1.679	0.0363302		1.679	0.0457724
1.68	0.100206		1.68	0.0355998		1.68	0.0458957
1.681	0.100132		1.681	0.0348912		1.681	0.0460164
1.682	0.100047		1.682	0.0342048		1.682	0.0461343
1.683	0.0999515		1.683	0.0335414		1.683	0.0462491
1.684	0.0998453		1.684	0.0329013		1.684	0.0463613
1.685	0.0997298		1.685	0.0322842		1.685	0.0464728
1.686	0.0996048		1.686	0.0316888		1.686	0.0465861
1.687	0.0994693		1.687	0.0311143		1.687	0.0467025
1.688	0.0993242		1.688	0.0305605		1.688	0.0468216
1.689	0.099172		1.689	0.0300281		1.689	0.0469422
1.69	0.0990152		1.69	0.0295169		1.69	0.0470629
1.691	0.0988557		1.691	0.029025		1.691	0.0471842
1.692	0.0986941		1.692	0.0285484		1.692	0.0473062
1.693	0.0985304		1.693	0.0280831		1.693	0.0474276
1.694	0.0983644		1.694	0.027626		1.694	0.0475453
1.695	0.0981962		1.695	0.0271738		1.695	0.0476559
1.696	0.0980262		1.696	0.0267229		1.696	0.0477568
1.697	0.0978553		1.697	0.0262694		1.697	0.0478455
1.698	0.0976843		1.698	0.0258106		1.698	0.0479197
1.699	0.0975143		1.699	0.025343		1.699	0.047978
1.7	0.0973468		1.7	0.0248634		1.7	0.0480201
1.701	0.0971827		1.701	0.0243695		1.701	0.0480458
1.702	0.0970224		1.702	0.0238608		1.702	0.0480545
1.703	0.0968653		1.703	0.0233361		1.703	0.0480443
1.704	0.0967112		1.704	0.0227945		1.704	0.0480126
1.705	0.0965603		1.705	0.0222357		1.705	0.0479573
1.706	0.0964135		1.706	0.0216598		1.706	0.0478772
1.707	0.0962717		1.707	0.0210665		1.707	0.0477714
1.708	0.0961363		1.708	0.0204562		1.708	0.0476394
1.709	0.0960085		1.709	0.0198296		1.709	0.0474803
1.71	0.0958886		1.71	0.0191877		1.71	0.0472945
1.711	0.0957771		1.711	0.0185316		1.711	0.0470836
1.712	0.095673		1.712	0.017863		1.712	0.046849
1.713	0.0955746		1.713	0.0171837		1.713	0.0465917
1.714	0.095481		1.714	0.0164951		1.714	0.046313
1.715	0.0953917		1.715	0.0157977		1.715	0.0460153
1.716	0.0953057		1.716	0.015092		1.716	0.0457002
1.717	0.0952213		1.717	0.0143792		1.717	0.045368
1.718	0.0951374		1.718	0.0136595		1.718	0.0450193
1.719	0.0950542		1.719	0.0129333		1.719	0.0446543
1.72	0.0949711		1.72	0.0122012		1.72	0.0442728
1.721	0.0948872		1.721	0.0114639		1.721	0.0438749
1.722	0.0948012		1.722	0.0107214		1.722	0.0434615
1.723	0.0947123		1.723	0.00997336		1.723	0.043035
1.724	0.0946205		1.724	0.00921911		1.724	0.0425983
1.725	0.0945271		1.725	0.00845831		1.725	0.0421549
1.726	0.0944331		1.726	0.00769194		1.726	0.0417076
1.727	0.0943379		1.727	0.00692152		1.727	0.0412583
1.728	0.0942409		1.728	0.00614714		1.728	0.0408074
1.729	0.094142		1.729	0.00536725		1.729	0.0403547
1.73	0.0940408		1.73	0.00457978		1.73	0.0399001
1.731	0.0939368		1.731	0.00378336		1.731	0.0394429
1.732	0.093829		1.732	0.00297686		1.732	0.0389821
1.733	0.0937153		1.733	0.00215898		1.733	0.0385179
1.734	0.0935938		1.734	0.00132897		1.734	0.0380507
1.735	0.093464		1.735	0.000485887		1.735	0.0375808
1.736	0.0933261		1.736	-0.000370571		1.736	0.0371076
1.737	0.0931803		1.737	-0.00123937		1.737	0.0366304
1.738	0.0930258		1.738	-0.00211846		1.738	0.0361487
1.739	0.0928618		1.739	-0.00300593		1.739	0.0356625
1.74	0.0926883		1.74	-0.00390082		1.74	0.0351717
1.741	0.0925061		1.741	-0.00480254		1.741	0.0346754
1.742	0.0923166		1.742	-0.00571006		1.742	0.0341722
1.743	0.0921216		1.743	-0.00662207		1.743	0.033661
1.744	0.0919226		1.744	-0.00753614		1.744	0.0331418
1.745	0.0917206		1.745	-0.00844947		1.745	0.0326143
1.746	0.0915166		1.746	-0.0093592		1.746	0.0320785
1.747	0.0913119		1.747	-0.0102626		1.747	0.0315359
1.748	0.0911075		1.748	-0.0111558		1.748	0.0309903
1.749	0.090904		1.749	-0.0120342		1.749	0.0304466
1.75	0.0907013		1.75	-0.0128934		1.75	0.0299096
1.751	0.0904996		1.751	-0.013729		1.751	0.0293838
1.752	0.0902997		1.752	-0.0145362		1.752	0.0288739
1.753	0.0901033		1.753	-0.0153112		1.753	0.0283834
1.754	0.0899114		1.754	-0.0160513		1.754	0.0279139
1.755	0.0897247		1.755	-0.0167545		1.755	0.0274648
1.756	0.0895434		1.756	-0.0174185		1.756	0.0270326
1.757	0.0893685		1.757	-0.0180407		1.757	0.0266137
1.758	0.0892012		1.758	-0.0186192		1.758	0.0262053
1.759	0.0890411		1.759	-0.0191524		1.759	0.0258061
1.76	0.0888879		1.76	-0.0196388		1.76	0.0254151
1.761	0.0887417		1.761	-0.0200768		1.761	0.0250308
1.762	0.088602		1.762	-0.0204658		1.762	0.0246516
1.763	0.0884687		1.763	-0.0208062		1.763	0.0242759
1.764	0.0883423		1.764	-0.0210995		1.764	0.0239024
1.765	0.0882234		1.765	-0.0213479		1.765	0.0235299
1.766	0.0881121		1.766	-0.0215548		1.766	0.0231579
1.767	0.0880077		1.767	-0.0217235		1.767	0.0227857
1.768	0.0879087		1.768	-0.0218565		1.768	0.0224121
1.769	0.0878149		1.769	-0.0219556		1.769	0.022036
1.77	0.0877261		1.77	-0.0220233		1.77	0.0216566
1.771	0.0876413		1.771	-0.0220635		1.771	0.0212739
1.772	0.0875589		1.772	-0.0220803		1.772	0.0208884
1.773	0.0874781		1.773	-0.022077		1.773	0.0205009
1.774	0.0873987		1.774	-0.0220565		1.774	0.0201113
1.775	0.0873203		1.775	-0.0220225		1.775	0.0197204
1.776	0.0872414		1.776	-0.0219804		1.776	0.01933
1.777	0.0871608		1.777	-0.0219364		1.777	0.0189426
1.778	0.0870772		1.778	-0.021897		1.778	0.01856
1.779	0.086989		1.779	-0.0218682		1.779	0.0181825
1.78	0.0868939		1.78	-0.0218554		1.78	0.0178096
1.781	0.08679		1.781	-0.0218634		1.781	0.0174392
1.782	0.0866759		1.782	-0.0218965		1.782	0.0170684
1.783	0.0865507		1.783	-0.021959		1.783	0.016694
1.784	0.0864136		1.784	-0.0220544		1.784	0.0163133
1.785	0.0862645		1.785	-0.022187		1.785	0.0159245
1.786	0.0861037		1.786	-0.0223613		1.786	0.0155262
1.787	0.0859318		1.787	-0.0225822		1.787	0.0151175
1.788	0.0857499		1.788	-0.022853		1.788	0.0146988
1.789	0.0855591		1.789	-0.0231758		1.789	0.0142705
1.79	0.0853605		1.79	-0.0235526		1.79	0.0138331
1.791	0.0851556		1.791	-0.0239853		1.791	0.0133867
1.792	0.0849455		1.792	-0.0244765		1.792	0.0129317
1.793	0.0847316		1.793	-0.0250278		1.793	0.0124681
1.794	0.0845154		1.794	-0.025639		1.794	0.0119964
1.795	0.0842986		1.795	-0.0263099		1.795	0.0115181
1.796	0.0840825		1.796	-0.0270404		1.796	0.0110351
1.797	0.0838678		1.797	-0.0278306		1.797	0.0105508
1.798	0.0836556		1.798	-0.0286793		1.798	0.0100675
1.799	0.0834481		1.799	-0.029585		1.799	0.00958583
1.8	0.0832475		1.8	-0.0305455		1.8	0.00910587
1.801	0.0830552		1.801	-0.0315577		1.801	0.00862894
1.802	0.0828727		1.802	-0.0326178		1.802	0.00815749
1.803	0.0827011		1.803	-0.0337214		1.803	0.00769485
1.804	0.0825409		1.804	-0.0348636		1.804	0.00724439
1.805	0.0823924		1.805	-0.0360385		1.805	0.00680805
1.806	0.0822563		1.806	-0.0372389		1.806	0.00638618
1.807	0.0821339		1.807	-0.0384562		1.807	0.00597813
1.808	0.0820258		1.808	-0.0396827		1.808	0.00558298
1.809	0.0819323		1.809	-0.0409097		1.809	0.0052
1.81	0.0818535		1.81	-0.0421288		1.81	0.00482885
1.811	0.0817892		1.811	-0.0433307		1.811	0.00446965
1.812	0.081739		1.812	-0.0445068		1.812	0.00412268
1.813	0.0817029		1.813	-0.0456487		1.813	0.00378749
1.814	0.0816815		1.814	-0.0467483		1.814	0.00346317
1.815	0.081675		1.815	-0.047797		1.815	0.00314978
1.816	0.0816825		1.816	-0.0487863		1.816	0.00284925
1.817	0.0817031		1.817	-0.0497086		1.817	0.00256466
1.818	0.0817352		1.818	-0.0505567		1.818	0.00229909
1.819	0.0817772		1.819	-0.0513242		1.819	0.0020551
1.82	0.0818274		1.82	-0.0520052		1.82	0.00183421
1.821	0.0818834		1.821	-0.0525946		1.821	0.00163711
1.822	0.0819433		1.822	-0.0530866		1.822	0.00146445
1.823	0.0820061		1.823	-0.0534758		1.823	0.0013167
1.824	0.0820708		1.824	-0.0537565		1.824	0.00119355
1.825	0.0821365		1.825	-0.0539248		1.825	0.00109442
1.826	0.0822012		1.826	-0.0539771		1.826	0.0010198
1.827	0.0822632		1.827	-0.0539108		1.827	0.000971473
1.828	0.0823203		1.828	-0.0537234		1.828	0.000950708
1.829	0.0823701		1.829	-0.0534124		1.829	0.000956652
1.83	0.0824112		1.83	-0.0529761		1.83	0.000986962
1.831	0.0824425		1.831	-0.0524146		1.831	0.00103935
1.832	0.0824632		1.832	-0.0517306		1.832	0.00111268
1.833	0.0824716		1.833	-0.0509282		1.833	0.00120758
1.834	0.0824665		1.834	-0.0500121		1.834	0.00132617
1.835	0.0824469		1.835	-0.0489876		1.835	0.00147111
1.836	0.0824127		1.836	-0.0478607		1.836	0.00164485
1.837	0.0823639		1.837	-0.0466388		1.837	0.00184906
1.838	0.0823009		1.838	-0.0453306		1.838	0.00208438
1.839	0.0822238		1.839	-0.0439454		1.839	0.00235095
1.84	0.0821321		1.84	-0.0424935		1.84	0.00264862
1.841	0.0820257		1.841	-0.0409864		1.841	0.00297739
1.842	0.0819052		1.842	-0.0394353		1.842	0.00333792
1.843	0.0817714		1.843	-0.03785		1.843	0.0037305
1.844	0.0816252		1.844	-0.0362399		1.844	0.0041544
1.845	0.0814672		1.845	-0.0346141		1.845	0.00460936
1.846	0.0812982		1.846	-0.032982		1.846	0.00509617
1.847	0.0811204		1.847	-0.0313528		1.847	0.00561569
1.848	0.0809365		1.848	-0.029734		1.848	0.00616794
1.849	0.0807497		1.849	-0.0281312		1.849	0.00675175
1.85	0.080562		1.85	-0.0265482		1.85	0.00736529
1.851	0.0803745		1.851	-0.0249885		1.851	0.00800673
1.852	0.0801889		1.852	-0.0234559		1.852	0.00867388
1.853	0.0800069		1.853	-0.021954		1.853	0.00936443
1.854	0.0798296		1.854	-0.020486		1.854	0.010077
1.855	0.0796571		1.855	-0.0190537		1.855	0.0108109
1.856	0.0794889		1.856	-0.0176587		1.856	0.0115654
1.857	0.0793243		1.857	-0.0163022		1.857	0.0123393
1.858	0.0791631		1.858	-0.0149847		1.858	0.0131309
1.859	0.0790058		1.859	-0.0137073		1.859	0.0139386
1.86	0.0788537		1.86	-0.0124724		1.86	0.0147605
1.861	0.0787071		1.861	-0.0112824		1.861	0.0155944
1.862	0.0785653		1.862	-0.0101382		1.862	0.0164382
1.863	0.0784273		1.863	-0.00903994		1.863	0.0172912
1.864	0.0782934		1.864	-0.00798817		1.864	0.0181533
1.865	0.0781643		1.865	-0.00698388		1.865	0.0190235
1.866	0.0780403		1.866	-0.00602756		1.866	0.0198992
1.867	0.0779208		1.867	-0.00511871		1.867	0.0207773
1.868	0.0778044		1.868	-0.00425557		1.868	0.0216552
1.869	0.0776898		1.869	-0.00343541		1.869	0.0225295
1.87	0.0775772		1.87	-0.00265507		1.87	0.0233975
1.871	0.0774662		1.871	-0.00191155		1.871	0.0242572
1.872	0.077357		1.872	-0.00120271		1.872	0.0251071
1.873	0.0772497		1.873	-0.000527814		1.873	0.025946
1.874	0.0771454		1.874	0.000113207		1.874	0.0267734
1.875	0.077045		1.875	0.000719547		1.875	0.0275894
1.876	0.0769485		1.876	0.00128922		1.876	0.0283927
1.877	0.0768558		1.877	0.00181995		1.877	0.0291815
1.878	0.0767661		1.878	0.00230961		1.878	0.0299552
1.879	0.076678		1.879	0.00275525		1.879	0.0307142
1.88	0.0765907		1.88	0.00315321		1.88	0.0314584
1.881	0.0765036		1.881	0.0034998		1.881	0.0321873
1.882	0.0764165		1.882	0.00379144		1.882	0.0329006
1.883	0.0763289		1.883	0.00402502		1.883	0.0335976
1.884	0.0762394		1.884	0.00419733		1.884	0.0342773
1.885	0.0761458		1.885	0.00430608		1.885	0.0349384
1.886	0.0760473		1.886	0.00435024		1.886	0.0355798
1.887	0.0759443		1.887	0.00432966		1.887	0.0362
1.888	0.0758385		1.888	0.00424524		1.888	0.0367976
1.889	0.0757312		1.889	0.00409916		1.889	0.0373704
1.89	0.0756223		1.89	0.00389534		1.89	0.0379168
1.891	0.0755111		1.891	0.00363772		1.891	0.0384368
1.892	0.0753973		1.892	0.00333029		1.892	0.0389317
1.893	0.0752813		1.893	0.00297664		1.893	0.0394031
1.894	0.0751647		1.894	0.00258082		1.894	0.0398531
1.895	0.0750498		1.895	0.00214884		1.895	0.0402842
1.896	0.074938		1.896	0.00168843		1.896	0.0406995
1.897	0.0748303		1.897	0.00120729		1.897	0.0411023
1.898	0.0747276		1.898	0.00071264		1.898	0.0414955
1.899	0.0746317		1.899	0.000211888		1.899	0.0418812
1.9	0.0745435		1.9	-0.000287982		1.9	0.0422618
1.901	0.0744627		1.901	-0.000780578		1.901	0.0426398
1.902	0.0743886		1.902	-0.00125863		1.902	0.0430173
1.903	0.0743214		1.903	-0.00171404		1.903	0.0433933
1.904	0.0742612		1.904	-0.00213867		1.904	0.0437634
1.905	0.0742078		1.905	-0.00252428		1.905	0.0441214
1.906	0.0741615		1.906	-0.00286221		1.906	0.0444619
1.907	0.0741232		1.907	-0.00314414		1.907	0.044782
1.908	0.0740944		1.908	-0.00336289		1.908	0.0450791
1.909	0.074076		1.909	-0.00351227		1.909	0.0453491
1.91	0.0740688		1.91	-0.00358619		1.91	0.0455867
1.911	0.0740728		1.911	-0.00357862		1.911	0.0457869
1.912	0.0740868		1.912	-0.00348486		1.912	0.0459447
1.913	0.0741089		1.913	-0.00330263		1.913	0.0460551
1.914	0.074138		1.914	-0.00303128		1.914	0.0461153
1.915	0.0741743		1.915	-0.0026705		1.915	0.0461247
1.916	0.0742181		1.916	-0.0022203		1.916	0.0460856
1.917	0.0742695		1.917	-0.00168017		1.917	0.046002
1.918	0.0743289		1.918	-0.00105098		1.918	0.0458793
1.919	0.0743963		1.919	-0.000334934		1.919	0.0457222
1.92	0.074471		1.92	0.00046524		1.92	0.0455361
1.921	0.0745514		1.921	0.00134712		1.921	0.0453263
1.922	0.0746359		1.922	0.00230755		1.922	0.045099
1.923	0.0747235		1.923	0.00334153		1.923	0.0448613
1.924	0.074814		1.924	0.00444209		1.924	0.0446191
1.925	0.0749074		1.925	0.00560046		1.925	0.0443758
1.926	0.0750032		1.926	0.00680771		1.926	0.044131
1.927	0.0750997		1.927	0.00805411		1.927	0.0438805
1.928	0.0751952		1.928	0.00932837		1.928	0.043615
1.929	0.075289		1.929	0.0106182		1.929	0.0433228
1.93	0.0753806		1.93	0.0119107		1.93	0.0429944
1.931	0.0754683		1.931	0.0131931		1.931	0.0426263
1.932	0.0755503		1.932	0.0144526		1.932	0.04222
1.933	0.0756263		1.933	0.0156769		1.933	0.0417811
1.934	0.0756965		1.934	0.016854		1.934	0.0413169
1.935	0.0757611		1.935	0.0179728		1.935	0.0408343
1.936	0.0758196		1.936	0.0190233		1.936	0.040339
1.937	0.0758712		1.937	0.0199963		1.937	0.0398346
1.938	0.0759153		1.938	0.0208827		1.938	0.0393232
1.939	0.0759513		1.939	0.0216732		1.939	0.0388055
1.94	0.0759799		1.94	0.0223591		1.94	0.0382825
1.941	0.0760014		1.941	0.0229326		1.941	0.0377549
1.942	0.0760164		1.942	0.0233884		1.942	0.0372217
1.943	0.0760264		1.943	0.0237227		1.943	0.0366813
1.944	0.076034		1.944	0.0239315		1.944	0.0361334
1.945	0.0760413		1.945	0.0240103		1.945	0.0355799
1.946	0.0760505		1.946	0.0239553		1.946	0.0350238
1.947	0.0760632		1.947	0.0237647		1.947	0.0344697
1.948	0.0760812		1.948	0.0234382		1.948	0.0339231
1.949	0.0761067		1.949	0.0229766		1.949	0.033389
1.95	0.0761417		1.95	0.02238		1.95	0.0328717
1.951	0.0761864		1.951	0.0216464		1.951	0.0323748
1.952	0.0762404		1.952	0.0207739		1.952	0.0319012
1.953	0.0763027		1.953	0.0197619		1.953	0.031452
1.954	0.0763727		1.954	0.0186108		1.954	0.031027
1.955	0.07645		1.955	0.0173205		1.955	0.030625
1.956	0.0765336		1.956	0.0158885		1.956	0.0302451
1.957	0.0766226		1.957	0.0143156		1.957	0.029885
1.958	0.0767164		1.958	0.0126195		1.958	0.0295419
1.959	0.0768138		1.959	0.010841		1.959	0.029213
1.96	0.0769132		1.96	0.00903137		1.96	0.0288959
1.961	0.0770125		1.961	0.00723895		1.961	0.0285899
1.962	0.0771096		1.962	0.00550296		1.962	0.0282963
1.963	0.0772035		1.963	0.00385294		1.963	0.0280172
1.964	0.0772952		1.964	0.00231042		1.964	0.0277551
1.965	0.0773857		1.965	0.000890457		1.965	0.0275128
1.966	0.0774743		1.966	-0.000396362		1.966	0.0272925
1.967	0.0775598		1.967	-0.00154291		1.967	0.0270948
1.968	0.0776416		1.968	-0.00254486		1.968	0.0269189
1.969	0.0777187		1.969	-0.00340007		1.969	0.0267632
1.97	0.0777894		1.97	-0.00410861		1.97	0.0266262
1.971	0.0778517		1.971	-0.00467212		1.971	0.0265068
1.972	0.0779049		1.972	-0.005093		1.972	0.0264042
1.973	0.0779492		1.973	-0.00537412		1.973	0.0263186
1.974	0.0779853		1.974	-0.0055199		1.974	0.0262494
1.975	0.0780136		1.975	-0.00553673		1.975	0.0261936
1.976	0.0780334		1.976	-0.00543239		1.976	0.0261481
1.977	0.0780441		1.977	-0.00521482		1.977	0.0261108
1.978	0.0780448		1.978	-0.00489189		1.978	0.0260812
1.979	0.0780352		1.979	-0.00447211		1.979	0.026059
1.98	0.0780151		1.98	-0.00396518		1.98	0.0260434
1.981	0.0779841		1.981	-0.00338067		1.981	0.0260337
1.982	0.0779421		1.982	-0.00272752		1.982	0.0260313
1.983	0.0778897		1.983	-0.00201449		1.983	0.0260387
1.984	0.0778275		1.984	-0.00125032		1.984	0.0260581
1.985	0.0777559		1.985	-0.00044302		1.985	0.0260911
1.986	0.0776756		1.986	0.000400212		1.986	0.0261399
1.987	0.0775883		1.987	0.00127284		1.987	0.0262075
1.988	0.0774947		1.988	0.00216963		1.988	0.0262955
1.989	0.0773955		1.989	0.0030862		1.989	0.0264042
1.99	0.0772916		1.99	0.00401937		1.99	0.0265336
1.991	0.0771842		1.991	0.00496635		1.991	0.0266848
1.992	0.0770752		1.992	0.0059256		1.992	0.0268584
1.993	0.0769662		1.993	0.00689691		1.993	0.0270531
[truncated: 1,006 more rows]
