# Supplementary material for: A two-lane mechanism for selective biological ammonium transport
Source: eLife. 2020 Jul 14;9:e57183. doi: 10.7554/eLife.57183 (PMC7447429; doi:10.7554/eLife.57183)
Supplement: Figure 4—source data 1. [file elife-57183-fig4-data1.xlsx]

## Sheet: Sheet1
Figure 4A								Figure 4B
	Maximum Amplitude								WT NH4 LPR 10:1		D160A NH4 LPR 10:1		D160E NH4 LPR 10:1
Variant	Average	St. dev						Concentration (mM)	Mean	St. Dev	Mean	St. Dev	Mean	St. Dev
WT	3	0.497647						200	1	0	1	0.024841	1	0.0143603
D160A	0.874752	0.140473						100	1	0.05	0.731947	0.037551	0.686619	0.0551567
D160E	1.56142	0.10583						50	1	0.0784314	0.522819	0.010976	0.263055	0.00848564
								25	0.960784	0.0457516	0.38937	0.013865	0.151762	0.0146867
								12.5	0.823529	0.0718954	0.255921	0.006355	0.0969321	0.00424282
								6.25	0.787582	0.00326797	0.160601	0.013865	0.084204	0.0166449
								3.13	0.614379	0	0.083189	0	0.0939948	0.00261097
								1.56	0.421569	0.00980392
								0.78	0.424837	0.00653595
								0.39	0.372549	0.00653595
								0.19	0.313725	0.0196078
