# Supplementary material for: A two-lane mechanism for selective biological ammonium transport
Source: eLife. 2020 Jul 14;9:e57183. doi: 10.7554/eLife.57183 (PMC7447429; doi:10.7554/eLife.57183)
Supplement: Figure 5—source data 1. [file elife-57183-fig5-data1.xlsx]

## Sheet: Amplitudes (Panels A and B)
200 mM Ammonium							200 mM Potassium
	Maximum Amplitude							Maximum Amplitude
Variant	Average	St. dev					Variant	Average	St. dev
WT	3	0.497647					WT	NM	NM
H168A	4.492	0.904849					H168A	0.562596	0.108397
H318A	1.84781	0.129081					H318A	0.353172	0.0125991
H168AH318A	0.222841	0.0170708					H168AH318A	NM	NM

## Sheet: Kinetics (Panel C)
	H168A NH4+ [Norm]		H318A NH4+ [Norm]					H168A K [Norm]		H318A K [Norm]
	Mean	St. Dev	Mean	St. Dev				Mean	St. Dev	Mean	St. Dev
200	1	0.070026	1	0.108295			200	1	0.12446	1	0.14359
100	0.538312	0.07298	0.609518	0.112864			100	0.465835	0.07689	0.535273	0.05017
50	0.336243	0.030126	0.363344	0.046589			50	0.2782	0.006058	0.262545	0.012794
25	0.254446	0.03915	0.190096	0.060546			25	0.150759	0.000691	0.145455	0.007842
12.5			0.108167	0.02819

## Sheet: D2O (Panel D)
2019-09-18-0037			2019-09-18-0038								2019-10-16-18				2019-10-16-17
H168A LPR 10 200 mM NH4+ D2O N3M1			H168A LPR 10 200 mM NH4+ H2O N3M2								AmtB H318A polar/popc 2/1 200 mM NH4 pH7 H2O n3:2				AmtB H318A polar/popc 2/1 (D2O made) 200 mM NH4 pH7 D2O n3:1
waveform	[0]		waveform	[0]							waveform	[0]			waveform	[0]
t0	43726.4		t0	43726.4							t0	43754.5			t0	43754.5
delta t	0.001		delta t	0.001							delta t	0.001			delta t	0.001
time	Y[0]		time	Y[0]							time	Y[0]			time	Y[0]
0.001	0.0229781		0	-5.49293e-05							0	-0.000117049			0	-2.34189e-05
0.002	0.0227797		0.001	-0.000358826							0.001	-0.000755893			0.001	-0.000164357
0.003	0.0222677		0.002	-0.00118438							0.002	-0.00245147			0.002	-0.000555207
0.004	0.0213438		0.003	-0.00273944							0.003	-0.00555272			0.003	-0.00125354
0.005	0.019963		0.004	-0.00512288							0.004	-0.0101803			0.004	-0.0022171
0.006	0.0181088		0.005	-0.0083462							0.005	-0.0163186			0.005	-0.00338311
0.007	0.0158036		0.006	-0.012355							0.006	-0.0238565			0.006	-0.0047301
0.008	0.0131228		0.007	-0.0170385							0.007	-0.0326046			0.007	-0.0062676
0.009	0.0101625		0.008	-0.0222644							0.008	-0.0423139			0.008	-0.0079887
0.01	0.00700914		0.009	-0.0279193							0.009	-0.0527097			0.009	-0.00985353
0.011	0.00375817		0.01	-0.0338782							0.01	-0.0635016			0.01	-0.0118003
0.012	0.000513357		0.011	-0.0399901							0.011	-0.0743866			0.011	-0.0137534
0.013	-0.00263633		0.012	-0.0461191							0.012	-0.0850886			0.012	-0.0156457
0.014	-0.00560857		0.013	-0.0521651							0.013	-0.0953702			0.013	-0.0174372
0.015	-0.00833263		0.014	-0.0580495							0.014	-0.105011			0.014	-0.0191014
0.016	-0.0107818		0.015	-0.0636967							0.015	-0.113828			0.015	-0.0206163
0.017	-0.012962		0.016	-0.0690359							0.016	-0.121721			0.016	-0.0219801
0.018	-0.0148752		0.017	-0.074011							0.017	-0.128655			0.017	-0.0232143
0.019	-0.016507		0.018	-0.0785839							0.018	-0.134637			0.018	-0.0243459
0.02	-0.0178305		0.019	-0.0827368							0.019	-0.139672			0.019	-0.0253894
0.021	-0.0188323		0.02	-0.086469							0.02	-0.143747			0.02	-0.0263431
0.022	-0.0195269		0.021	-0.0897926							0.021	-0.146867			0.021	-0.027202
0.023	-0.0199447		0.022	-0.0927237							0.022	-0.149102			0.022	-0.0279684
0.024	-0.020136		0.023	-0.0952749							0.023	-0.150585			0.023	-0.0286431
0.025	-0.02016		0.024	-0.0974526							0.024	-0.151451			0.024	-0.0292272
0.026	-0.0200556		0.025	-0.0992701							0.025	-0.151785			0.025	-0.0297216
0.027	-0.0198538		0.026	-0.100765							0.026	-0.151634			0.026	-0.0300981
0.028	-0.0195914		0.027	-0.101992							0.027	-0.151051			0.027	-0.0303083
0.029	-0.0192875		0.028	-0.103013							0.028	-0.150123			0.028	-0.0303332
0.03	-0.0189487		0.029	-0.103874							0.029	-0.148952			0.029	-0.0301758
0.031	-0.0186001		0.03	-0.104618							0.03	-0.147614			0.03	-0.0298361
0.032	-0.0182657		0.031	-0.105278							0.031	-0.146137			0.031	-0.0293404
0.033	-0.0179412		0.032	-0.105864							0.032	-0.144554			0.032	-0.028741
0.034	-0.0176091		0.033	-0.106363							0.033	-0.142913			0.033	-0.0280763
0.035	-0.017256		0.034	-0.106779							0.034	-0.141252			0.034	-0.0273857
0.036	-0.0168885		0.035	-0.107136							0.035	-0.139592			0.035	-0.0267229
0.037	-0.0165328		0.036	-0.107441							0.036	-0.137952			0.036	-0.0261274
0.038	-0.0162258		0.037	-0.107687							0.037	-0.136322			0.037	-0.0256293
0.039	-0.0160041		0.038	-0.107882							0.038	-0.134697			0.038	-0.0252448
0.04	-0.0158784		0.039	-0.108057							0.039	-0.133109			0.039	-0.0249504
0.041	-0.0158293		0.04	-0.108236							0.04	-0.13159			0.04	-0.0247202
0.042	-0.0158278		0.041	-0.108423							0.041	-0.130136			0.041	-0.0245589
0.043	-0.0158492		0.042	-0.108612							0.042	-0.128736			0.042	-0.0244644
0.044	-0.0158828		0.043	-0.108793							0.043	-0.127395			0.043	-0.0244153
0.045	-0.0159288		0.044	-0.108955							0.044	-0.126116			0.044	-0.0243996
0.046	-0.0159808		0.045	-0.109079							0.045	-0.124884			0.045	-0.0244139
0.047	-0.0160261		0.046	-0.109145							0.046	-0.123708			0.046	-0.024445
0.048	-0.0160658		0.047	-0.109164							0.047	-0.122623			0.047	-0.0244751
0.049	-0.0161045		0.048	-0.109171							0.048	-0.121631			0.048	-0.0244903
0.05	-0.0161365		0.049	-0.1092							0.049	-0.120703			0.049	-0.0244582
0.051	-0.0161667		0.05	-0.109274							0.05	-0.119806			0.05	-0.0243451
0.052	-0.0162129		0.051	-0.10941							0.051	-0.118921			0.051	-0.0241719
0.053	-0.0162856		0.052	-0.109611							0.052	-0.118043			0.052	-0.0240026
0.054	-0.0163725		0.053	-0.109886							0.053	-0.117146			0.053	-0.0238876
0.055	-0.0164535		0.054	-0.110223							0.054	-0.116196			0.054	-0.0238306
0.056	-0.0165278		0.055	-0.110594							0.055	-0.115186			0.055	-0.0237916
0.057	-0.0166091		0.056	-0.110973							0.056	-0.114148			0.056	-0.0237365
0.058	-0.0167091		0.057	-0.111336							0.057	-0.113123			0.057	-0.0236717
0.059	-0.0168345		0.058	-0.111668							0.058	-0.112136			0.058	-0.0236068
0.06	-0.0169895		0.059	-0.111964							0.059	-0.111215			0.059	-0.023542
0.061	-0.017184		0.06	-0.112227							0.06	-0.110379			0.06	-0.023497
0.062	-0.0174203		0.061	-0.112451							0.061	-0.109626			0.061	-0.0234921
0.063	-0.0176763		0.062	-0.112612							0.062	-0.108961			0.062	-0.0235238
0.064	-0.0179098		0.063	-0.112674							0.063	-0.108406			0.063	-0.0235758
0.065	-0.0180772		0.064	-0.112595							0.064	-0.107962			0.064	-0.0236413
0.066	-0.0181584		0.065	-0.112336							0.065	-0.107605			0.065	-0.0237338
0.067	-0.0181627		0.066	-0.111876							0.066	-0.107286			0.066	-0.0238715
0.068	-0.0181157		0.067	-0.111229							0.067	-0.106967			0.067	-0.0240618
0.069	-0.0180428		0.068	-0.110427							0.068	-0.106656			0.068	-0.0242916
0.07	-0.017953		0.069	-0.109504							0.069	-0.106396			0.069	-0.0245289
0.071	-0.0178468		0.07	-0.108471							0.07	-0.106224			0.07	-0.0247477
0.072	-0.0177247		0.071	-0.107325							0.071	-0.106161			0.071	-0.024945
0.073	-0.0175803		0.072	-0.106073							0.072	-0.106239			0.072	-0.0251347
0.074	-0.0174237		0.073	-0.104726							0.073	-0.106502			0.073	-0.0253209
0.075	-0.0172907		0.074	-0.103281							0.074	-0.106986			0.074	-0.025486
0.076	-0.0172075		0.075	-0.101744							0.075	-0.107704			0.075	-0.0256168
0.077	-0.0171727		0.076	-0.100127							0.076	-0.108653			0.076	-0.0257077
0.078	-0.0171607		0.077	-0.0984518							0.077	-0.109806			0.077	-0.0257483
0.079	-0.0171358		0.078	-0.0967503							0.078	-0.111091			0.078	-0.0257442
0.08	-0.0170779		0.079	-0.095055							0.079	-0.112402			0.079	-0.025722
0.081	-0.0169922		0.08	-0.0933828							0.08	-0.113626			0.08	-0.0256967
0.082	-0.0169039		0.081	-0.0917545							0.081	-0.114671			0.081	-0.0256572
0.083	-0.0168421		0.082	-0.09019							0.082	-0.115485			0.082	-0.0255734
0.084	-0.0168262		0.083	-0.0886921							0.083	-0.116038			0.083	-0.0254174
0.085	-0.0168657		0.084	-0.0872639							0.084	-0.116321			0.084	-0.025197
0.086	-0.0169729		0.085	-0.0859109							0.085	-0.116315			0.085	-0.0249602
0.087	-0.0171677		0.086	-0.0846325							0.086	-0.11598			0.086	-0.0247555
0.088	-0.0174459		0.087	-0.0834302							0.087	-0.115321			0.087	-0.0246005
0.089	-0.0177636		0.088	-0.0823081							0.088	-0.114409			0.088	-0.02448
0.09	-0.0180705		0.089	-0.0812725							0.089	-0.11334			0.089	-0.0243606
0.091	-0.0183414		0.09	-0.080335							0.09	-0.112169			0.09	-0.0242342
0.092	-0.0185778		0.091	-0.0795081							0.091	-0.110898			0.091	-0.0241316
0.093	-0.0187968		0.092	-0.0787971							0.092	-0.109512			0.092	-0.0240817
0.094	-0.0190202		0.093	-0.0781705							0.093	-0.108004			0.093	-0.0240938
0.095	-0.0192685		0.094	-0.0775547							0.094	-0.106402			0.094	-0.024166
0.096	-0.0195544		0.095	-0.0769078							0.095	-0.104764			0.095	-0.0242853
0.097	-0.0198759		0.096	-0.076276							0.096	-0.103146			0.096	-0.0244331
0.098	-0.0202284		0.097	-0.0757558							0.097	-0.101586			0.097	-0.0245897
0.099	-0.0206059		0.098	-0.0754346							0.098	-0.100095			0.098	-0.0247303
0.1	-0.0209866		0.099	-0.0753492							0.099	-0.0986645			0.099	-0.0248455
0.101	-0.0213429		0.1	-0.0754585							0.1	-0.097274			0.1	-0.0249651
0.102	-0.0216497		0.101	-0.0756583							0.101	-0.0959124			0.101	-0.0251168
0.103	-0.021888		0.102	-0.0758142							0.102	-0.0945885			0.102	-0.0252868
0.104	-0.0220563		0.103	-0.0757734							0.103	-0.0933384			0.103	-0.02544
0.105	-0.0221603		0.104	-0.075391							0.104	-0.0921979			0.104	-0.0255519
0.106	-0.0221879		0.105	-0.0745856							0.105	-0.0911631			0.105	-0.0256129
0.107	-0.0221197		0.106	-0.0733516							0.106	-0.0901999			0.106	-0.0256108
0.108	-0.0219599		0.107	-0.0717135							0.107	-0.0892866			0.107	-0.0255299
0.109	-0.0217365		0.108	-0.0696958							0.108	-0.0884363			0.108	-0.0253784
0.11	-0.0214776		0.109	-0.0673499							0.109	-0.0876772			0.109	-0.0251736
0.111	-0.0211941		0.11	-0.0647657							0.11	-0.087004			0.11	-0.0249073
0.112	-0.0208762		0.111	-0.0620511							0.111	-0.0863783			0.111	-0.0245827
0.113	-0.02052		0.112	-0.0593341							0.112	-0.0857604			0.112	-0.0242435
0.114	-0.0201524		0.113	-0.0567431							0.113	-0.0851225			0.113	-0.0239282
0.115	-0.0198057		0.114	-0.0543716							0.114	-0.0844638			0.114	-0.0236517
0.116	-0.0194899		0.115	-0.052305							0.115	-0.0838014			0.115	-0.0234255
0.117	-0.0192081		0.116	-0.0506408							0.116	-0.0831424			0.116	-0.0232624
0.118	-0.018971		0.117	-0.0494481							0.117	-0.0824892			0.117	-0.0231872
0.119	-0.0187706		0.118	-0.0487423							0.118	-0.0818392			0.118	-0.0232274
0.12	-0.0185652		0.119	-0.048505							0.119	-0.081169			0.119	-0.0233757
0.121	-0.0183238		0.12	-0.0487084							0.12	-0.0804739			0.12	-0.0235918
0.122	-0.0180567		0.121	-0.0493163							0.121	-0.0797983			0.121	-0.0238294
0.123	-0.0177891		0.122	-0.0502807							0.122	-0.079171			0.122	-0.0240587
0.124	-0.0175351		0.123	-0.0515607							0.123	-0.0785578			0.123	-0.0242816
0.125	-0.0173014		0.124	-0.0531127							0.124	-0.0779109			0.124	-0.0245039
0.126	-0.0171075		0.125	-0.0548629							0.125	-0.07722			0.125	-0.0247131
0.127	-0.0169795		0.126	-0.0567395							0.126	-0.0764968			0.126	-0.0249051
0.128	-0.0169211		0.127	-0.0586934							0.127	-0.0757487			0.127	-0.0250782
0.129	-0.016914		0.128	-0.060673							0.128	-0.0749745			0.128	-0.0252074
0.13	-0.0169375		0.129	-0.0626429							0.129	-0.0741798			0.129	-0.0252641
0.131	-0.0169732		0.13	-0.0645985							0.13	-0.0734047			0.13	-0.0252332
0.132	-0.0170115		0.131	-0.0665357							0.131	-0.0727152			0.131	-0.0251088
0.133	-0.0170624		0.132	-0.0684327							0.132	-0.0721639			0.132	-0.0248926
0.134	-0.0171413		0.133	-0.070246							0.133	-0.0717612			0.133	-0.0245965
0.135	-0.0172528		0.134	-0.0719162							0.134	-0.0714532			0.134	-0.0242465
0.136	-0.0173884		0.135	-0.0733974							0.135	-0.0711524			0.135	-0.0238646
0.137	-0.0175374		0.136	-0.0746843							0.136	-0.0708141			0.136	-0.023443
0.138	-0.0177033		0.137	-0.0758032							0.137	-0.0704481			0.137	-0.0229767
0.139	-0.0179002		0.138	-0.0767905							0.138	-0.0700697			0.138	-0.0225018
0.14	-0.0181303		0.139	-0.0776711							0.139	-0.0696846			0.139	-0.0220563
0.141	-0.0183826		0.14	-0.0784457							0.14	-0.0693062			0.14	-0.0216504
0.142	-0.0186438		0.141	-0.0791044							0.141	-0.0689417			0.141	-0.0213018
0.143	-0.0188953		0.142	-0.0796478							0.142	-0.068563			0.142	-0.0210494
0.144	-0.0191116		0.143	-0.0800815							0.143	-0.0681099			0.143	-0.0209147
0.145	-0.0192877		0.144	-0.0803902							0.144	-0.0675157			0.144	-0.0208765
0.146	-0.0194488		0.145	-0.0805384							0.145	-0.0667503			0.145	-0.020899
0.147	-0.0196074		0.146	-0.0805053							0.146	-0.0658389			0.146	-0.0209626
0.148	-0.0197453		0.147	-0.0802839							0.147	-0.0648106			0.147	-0.0210629
0.149	-0.0198461		0.148	-0.0798522							0.148	-0.0636664			0.148	-0.0212093
0.15	-0.0199179		0.149	-0.0791902							0.149	-0.0624107			0.149	-0.0214108
0.151	-0.0199923		0.15	-0.0783055							0.15	-0.0610479			0.15	-0.0216651
0.152	-0.0200941		0.151	-0.0772098							0.151	-0.0595628			0.151	-0.0219612
0.153	-0.0202179		0.152	-0.0759037							0.152	-0.0579281			0.152	-0.0222817
0.154	-0.0203579		0.153	-0.0743986							0.153	-0.0560651			0.153	-0.0226189
0.155	-0.0205324		0.154	-0.0727296							0.154	-0.0538041			0.154	-0.0229658
0.156	-0.0207712		0.155	-0.0709473							0.155	-0.0509291			0.155	-0.0233031
0.157	-0.0210876		0.156	-0.0691115							0.156	-0.0472314			0.156	-0.0236399
0.158	-0.0214686		0.157	-0.0672911							0.157	-0.0425295			0.157	-0.0240166
0.159	-0.0218959		0.158	-0.0655636							0.158	-0.0367064			0.158	-0.0244373
0.16	-0.0223515		0.159	-0.0639948							0.159	-0.0297419			0.159	-0.0248596
0.161	-0.022811		0.16	-0.0626078							0.16	-0.0217064			0.16	-0.0252513
0.162	-0.0232465		0.161	-0.0613903							0.161	-0.0127526			0.161	-0.0256004
0.163	-0.0236309		0.162	-0.0603286							0.162	-0.00310465			0.162	-0.0258887
0.164	-0.023938		0.163	-0.0594036							0.163	0.00697456			0.163	-0.0260908
0.165	-0.0241363		0.164	-0.0585784							0.164	0.0172132			0.164	-0.0261967
0.166	-0.0242128		0.165	-0.0578292							0.165	0.0273375			0.165	-0.0262236
0.167	-0.0241909		0.166	-0.0571527							0.166	0.0370784			0.166	-0.026211
0.168	-0.0240992		0.167	-0.0565408							0.167	0.0462035			0.167	-0.026201
0.169	-0.0239506		0.168	-0.0559781							0.168	0.0545321			0.168	-0.0262249
0.17	-0.023758		0.169	-0.0554461							0.169	0.0619343			0.169	-0.0262895
0.171	-0.0235451		0.17	-0.0549166							0.17	0.0683395			0.17	-0.0263673
0.172	-0.0233311		0.171	-0.054356							0.171	0.0737155			0.171	-0.0264334
0.173	-0.0231281		0.172	-0.0537428							0.172	0.0780362			0.172	-0.0264935
0.174	-0.0229656		0.173	-0.0530843							0.173	0.0812692			0.173	-0.0265534
0.175	-0.022883		0.174	-0.0524019							0.174	0.0833674			0.174	-0.0265989
0.176	-0.0228882		0.175	-0.0517103							0.175	0.084285			0.175	-0.0266177
0.177	-0.0229535		0.176	-0.051012							0.176	0.0840266			0.176	-0.0266093
0.178	-0.0230598		0.177	-0.0502983							0.177	0.0826574			0.177	-0.0265825
0.179	-0.0232202		0.178	-0.0495697							0.178	0.0802644			0.178	-0.0265615
0.18	-0.0234617		0.179	-0.0488334							0.179	0.0769449			0.179	-0.0265776
0.181	-0.0237981		0.18	-0.0480865							0.18	0.0728051			0.18	-0.0266418
0.182	-0.0242204		0.181	-0.0473409							0.181	0.067955			0.181	-0.0267375
0.183	-0.0247035		0.182	-0.0466167							0.182	0.0625249			0.182	-0.0268435
0.184	-0.0252324		0.183	-0.0459041							0.183	0.0566553			0.183	-0.0269423
0.185	-0.0258079		0.184	-0.0451915							0.184	0.0504586			0.184	-0.0270136
0.186	-0.0264214		0.185	-0.044507							0.185	0.0440207			0.185	-0.0270502
0.187	-0.0270509		0.186	-0.0438931							0.186	0.0374371			0.186	-0.0270794
0.188	-0.0276649		0.187	-0.0433581							0.187	0.0308177			0.187	-0.0271344
0.189	-0.028217		0.188	-0.0428717							0.188	0.0242583			0.188	-0.0271991
0.19	-0.0286626		0.189	-0.0424017							0.189	0.0178452			0.189	-0.0272264
0.191	-0.0289947		0.19	-0.0419254							0.19	0.0116812			0.19	-0.0272137
0.192	-0.0292481		0.191	-0.0414191							0.191	0.00586664			0.191	-0.0272001
0.193	-0.0294531		0.192	-0.0408733							0.192	0.000469432			0.192	-0.0271925
0.194	-0.0296048		0.193	-0.0403002							0.193	-0.00443853			0.193	-0.0271557
0.195	-0.029684		0.194	-0.0397139							0.194	-0.00876178			0.194	-0.0270658
0.196	-0.0296818		0.195	-0.0391157							0.195	-0.0124361			0.195	-0.0269184
0.197	-0.0295979		0.196	-0.0384918							0.196	-0.015446			0.196	-0.026716
0.198	-0.0294367		0.197	-0.0378339							0.197	-0.0177958			0.197	-0.0264758
0.199	-0.0292141		0.198	-0.0371481							0.198	-0.0194955			0.198	-0.0262128
0.2	-0.0289604		0.199	-0.0364334							0.199	-0.0205565			0.199	-0.0259275
0.201	-0.0287008		0.2	-0.0356805							0.2	-0.0209887			0.2	-0.0256215
0.202	-0.0284386		0.201	-0.0348878							0.201	-0.0208026			0.201	-0.0253063
0.203	-0.0281766		0.202	-0.0340638							0.202	-0.0200353			0.202	-0.0250021
0.204	-0.0279324		0.203	-0.0332185							0.203	-0.0187595			0.203	-0.0247314
0.205	-0.0277101		0.204	-0.032353							0.204	-0.0170481			0.204	-0.0245034
0.206	-0.0274982		0.205	-0.0314589							0.205	-0.0149693			0.205	-0.0243023
0.207	-0.027303		0.206	-0.030531							0.206	-0.0125988			0.206	-0.0241075
0.208	-0.027145		0.207	-0.0295738							0.207	-0.00999372			0.207	-0.0239369
0.209	-0.0270356		0.208	-0.0285939							0.208	-0.00716373			0.208	-0.0238358
0.21	-0.0269727		0.209	-0.0275837							0.209	-0.00410524			0.209	-0.0238135
0.211	-0.0269388		0.21	-0.0265373							0.21	-0.000855021			0.21	-0.0238342
0.212	-0.0269007		0.211	-0.0254779							0.211	0.00253018			0.211	-0.0238767
0.213	-0.02683		0.212	-0.0244442							0.212	0.00601357			0.212	-0.0239587
0.214	-0.0267276		0.213	-0.0234603							0.213	0.00957525			0.213	-0.0241014
0.215	-0.026606		0.214	-0.0225362							0.214	0.0132008			0.214	-0.0243048
0.216	-0.0264592		0.215	-0.0216839							0.215	0.0168658			0.215	-0.0245621
0.217	-0.0262758		0.216	-0.0209103							0.216	0.0205113			0.216	-0.0248732
0.218	-0.0260612		0.217	-0.0202178							0.217	0.0240372			0.217	-0.0252234
0.219	-0.0258253		0.218	-0.0196244							0.218	0.0273281			0.218	-0.0255672
0.22	-0.0255672		0.219	-0.0191507							0.219	0.0303024			0.219	-0.0258617
0.221	-0.0252866		0.22	-0.0187925							0.22	0.0329255			0.22	-0.0260872
0.222	-0.0249927		0.221	-0.0185147							0.221	0.0351805			0.221	-0.0262219
0.223	-0.0246904		0.222	-0.0182785							0.222	0.037064			0.222	-0.0262475
0.224	-0.0243784		0.223	-0.0180682							0.223	0.0385873			0.223	-0.0261836
0.225	-0.0240604		0.224	-0.0178851							0.224	0.0397669			0.224	-0.0260642
0.226	-0.0237462		0.225	-0.0177298							0.225	0.0406146			0.225	-0.0258937
0.227	-0.0234416		0.226	-0.0175986							0.226	0.0411218			0.226	-0.0256571
0.228	-0.0231545		0.227	-0.0174906							0.227	0.0412834			0.227	-0.0253491
0.229	-0.0229034		0.228	-0.0174021							0.228	0.0411324			0.228	-0.0249937
0.23	-0.0226955		0.229	-0.0173274							0.229	0.0407158			0.229	-0.024639
0.231	-0.0225219		0.23	-0.0172636							0.23	0.0400728			0.23	-0.024314
0.232	-0.0223783		0.231	-0.0172032							0.231	0.0392376			0.231	-0.0240243
0.233	-0.0222582		0.232	-0.0171334							0.232	0.0382448			0.232	-0.0237902
0.234	-0.0221598		0.233	-0.0170517							0.233	0.0371327			0.233	-0.0236526
0.235	-0.0221156		0.234	-0.0169696							0.234	0.0359243			0.234	-0.0236565
0.236	-0.0221652		0.235	-0.0169102							0.235	0.034636			0.235	-0.0238171
0.237	-0.0223113		0.236	-0.0168951							0.236	0.0333073			0.236	-0.0240925
0.238	-0.0225224		0.237	-0.0169342							0.237	0.0319813			0.237	-0.024418
0.239	-0.0227594		0.238	-0.0170254							0.238	0.0306632			0.238	-0.0247406
0.24	-0.0229828		0.239	-0.0171457							0.239	0.0293258			0.239	-0.0250246
0.241	-0.0231436		0.24	-0.0172576							0.24	0.0279498			0.24	-0.0252725
0.242	-0.0232017		0.241	-0.0173447							0.241	0.0265384			0.241	-0.0255039
0.243	-0.0231433		0.242	-0.0174097							0.242	0.0251005			0.242	-0.0257137
0.244	-0.0229681		0.243	-0.0174435							0.243	0.0236474			0.243	-0.0258807
0.245	-0.0226834		0.244	-0.0174327							0.244	0.0222018			0.244	-0.0259944
0.246	-0.0223153		0.245	-0.0173756							0.245	0.020792			0.245	-0.0260684
0.247	-0.0219142		0.246	-0.017286							0.246	0.0194271			0.246	-0.0261365
0.248	-0.021528		0.247	-0.0171968							0.247	0.0180875			0.247	-0.0262295
0.249	-0.0211683		0.248	-0.0171529							0.248	0.0167623			0.248	-0.0263665
0.25	-0.0208262		0.249	-0.0171874							0.249	0.0154784			0.249	-0.0265548
0.251	-0.0205008		0.25	-0.0173005							0.25	0.0142702			0.25	-0.0267721
0.252	-0.0201957		0.251	-0.0174713							0.251	0.013141			0.251	-0.0269816
0.253	-0.019914		0.252	-0.0176799							0.252	0.0120661			0.252	-0.0271793
0.254	-0.0196581		0.253	-0.0179225							0.253	0.0110301			0.253	-0.0273778
0.255	-0.0194269		0.254	-0.0182145							0.254	0.0100341			0.254	-0.0275655
0.256	-0.0192263		0.255	-0.0185726							0.255	0.00905651			0.255	-0.0277196
0.257	-0.0190809		0.256	-0.0189845							0.256	0.00805202			0.256	-0.0278348
0.258	-0.0190199		0.257	-0.0194069							0.257	0.00699857			0.257	-0.0279265
0.259	-0.0190442		0.258	-0.019811							0.258	0.00591157			0.258	-0.0279996
0.26	-0.0191285		0.259	-0.020204							0.259	0.0048163			0.259	-0.0280351
0.261	-0.0192523		0.26	-0.0205961							0.26	0.00372234			0.26	-0.0280365
0.262	-0.0193862		0.261	-0.020979							0.261	0.00264402			0.261	-0.0280424
0.263	-0.019491		0.262	-0.0213404							0.262	0.0016199			0.262	-0.0280807
0.264	-0.0195613		0.263	-0.021671							0.263	0.000666431			0.263	-0.0281364
0.265	-0.0196152		0.264	-0.0219626							0.264	-0.000245878			0.264	-0.0281621
0.266	-0.0196517		0.265	-0.0222137							0.265	-0.00113869			0.265	-0.0281106
0.267	-0.0196508		0.266	-0.0224261							0.266	-0.00200019			0.266	-0.0279577
0.268	-0.0196028		0.267	-0.0225972							0.267	-0.00280069			0.267	-0.0277102
0.269	-0.0195165		0.268	-0.0227206							0.268	-0.00351291			0.268	-0.0274088
0.27	-0.0194079		0.269	-0.0227868							0.269	-0.00413261			0.269	-0.0271113
0.271	-0.0193042		0.27	-0.0227993							0.27	-0.00465442			0.27	-0.0268598
0.272	-0.0192258		0.271	-0.0228							0.271	-0.00505283			0.271	-0.0266583
0.273	-0.0191501		0.272	-0.0228387							0.272	-0.0053176			0.272	-0.0264902
0.274	-0.0190354		0.273	-0.022923							0.273	-0.00546463			0.273	-0.0263516
0.275	-0.018872		0.274	-0.0230298							0.274	-0.00552073			0.274	-0.0262592
0.276	-0.0186875		0.275	-0.0231504							0.275	-0.00553272			0.275	-0.0262364
0.277	-0.0185087		0.276	-0.0232967							0.276	-0.00555111			0.276	-0.0262924
0.278	-0.0183241		0.277	-0.0234795							0.277	-0.0055949			0.277	-0.0264202
0.279	-0.0180976		0.278	-0.0237056							0.278	-0.00566195			0.278	-0.0266277
0.28	-0.0178089		0.279	-0.0239868							0.279	-0.00576344			0.279	-0.0269293
0.281	-0.0174562		0.28	-0.0243294							0.28	-0.00592222			0.28	-0.0273057
0.282	-0.0170535		0.281	-0.0247224							0.281	-0.00614056			0.281	-0.0277275
0.283	-0.0166372		0.282	-0.0251359							0.282	-0.00639943			0.282	-0.0281813
0.284	-0.0162494		0.283	-0.0255325							0.283	-0.00667361			0.283	-0.028656
0.285	-0.0159188		0.284	-0.025898							0.284	-0.00692827			0.284	-0.0291336
0.286	-0.0156468		0.285	-0.0262499							0.285	-0.00713327			0.285	-0.0295796
0.287	-0.0154041		0.286	-0.0266063							0.286	-0.00728227			0.286	-0.0299635
0.288	-0.0151668		0.287	-0.0269619							0.287	-0.00739938			0.287	-0.0302837
0.289	-0.014948		0.288	-0.0273005							0.288	-0.00753343			0.288	-0.0305382
0.29	-0.0147703		0.289	-0.0276181							0.289	-0.00770442			0.289	-0.0307104
0.291	-0.0146445		0.29	-0.0279264							0.29	-0.00787158			0.29	-0.0307874
0.292	-0.014581		0.291	-0.0282472							0.291	-0.00797761			0.291	-0.0307603
0.293	-0.0145765		0.292	-0.028608							0.292	-0.00798016			0.292	-0.0306266
0.294	-0.0146146		0.293	-0.0290228							0.293	-0.00786026			0.293	-0.0304064
0.295	-0.0147048		0.294	-0.0294731							0.294	-0.00763437			0.294	-0.0301221
0.296	-0.014866		0.295	-0.0299214							0.295	-0.00732776			0.295	-0.0297774
0.297	-0.0150854		0.296	-0.0303362							0.296	-0.00695056			0.296	-0.029382
0.298	-0.0153351		0.297	-0.0307149							0.297	-0.00653263			0.297	-0.0289676
0.299	-0.0155956		0.298	-0.031092							0.298	-0.00613111			0.298	-0.0285781
0.3	-0.0158506		0.299	-0.0315034							0.299	-0.00578399			0.299	-0.0282448
0.301	-0.0160882		0.3	-0.0319503							0.3	-0.0055052			0.3	-0.0279646
0.302	-0.0163051		0.301	-0.0323942							0.301	-0.00530116			0.301	-0.027718
0.303	-0.0165111		0.302	-0.0327838							0.302	-0.00517068			0.302	-0.0275146
0.304	-0.0167115		0.303	-0.0331101							0.303	-0.00510699			0.303	-0.0273948
0.305	-0.0168793		0.304	-0.0334081							0.304	-0.00508182			0.304	-0.0273917
0.306	-0.0169772		0.305	-0.033705							0.305	-0.00505857			0.305	-0.0275147
0.307	-0.016995		0.306	-0.0340076							0.306	-0.00504			0.306	-0.0277463
0.308	-0.0169375		0.307	-0.0343119							0.307	-0.00505481			0.307	-0.0280522
0.309	-0.0167949		0.308	-0.0345945							0.308	-0.00510975			0.308	-0.0284238
0.31	-0.0165293		0.309	-0.0348134							0.309	-0.00519339			0.309	-0.0288764
0.311	-0.0160716		0.31	-0.0349409							0.31	-0.00531772			0.31	-0.0294167
0.312	-0.0153188		0.311	-0.0349705							0.311	-0.00551916			0.311	-0.0300632
0.313	-0.0141302		0.312	-0.0348684							0.312	-0.00580372			0.312	-0.0308408
0.314	-0.0123322		0.313	-0.0345215							0.313	-0.006133			0.313	-0.0317415
0.315	-0.00973297		0.314	-0.0336458							0.314	-0.00647882			0.314	-0.0327283
0.316	-0.00607767		0.315	-0.0316136							0.315	-0.00684682			0.315	-0.0337546
0.317	-0.000931361		0.316	-0.027328							0.316	-0.00724432			0.316	-0.0347504
0.318	0.00650393		0.317	-0.0192437							0.317	-0.00765977			0.317	-0.0355873
0.319	0.0176902		0.318	-0.00545976							0.318	-0.00807857			0.318	-0.0360991
0.32	0.0351182		0.319	0.0162008							0.319	-0.00850504			0.319	-0.0361464
0.321	0.0627873		0.32	0.0488131							0.32	-0.00896289			0.32	-0.0356511
0.322	0.106034		0.321	0.0973529							0.321	-0.009486			0.321	-0.0346306
0.323	0.169408		0.322	0.167357							0.322	-0.0100909			0.322	-0.0332048
0.324	0.254137		0.323	0.261645							0.323	-0.0107525			0.323	-0.0315259
0.325	0.357643		0.324	0.378814							0.324	-0.011432			0.324	-0.0297371
0.326	0.474666		0.325	0.514036							0.325	-0.0121152			0.325	-0.0279957
0.327	0.598602		0.326	0.660454							0.326	-0.0128261			0.326	-0.0264636
0.328	0.722592		0.327	0.810457							0.327	-0.0136186			0.327	-0.0252695
0.329	0.840266		0.328	0.956626							0.328	-0.0145467			0.328	-0.024507
0.33	0.946169		0.329	1.09236							0.329	-0.0156516			0.329	-0.024252
0.331	1.03601		0.33	1.21222							0.33	-0.0169545			0.33	-0.0245581
0.332	1.10674		0.331	1.31207							0.331	-0.0184616			0.331	-0.0254478
0.333	1.15655		0.332	1.38914							0.332	-0.0201852			0.332	-0.026934
0.334	1.18475		0.333	1.442							0.333	-0.0221049			0.333	-0.0290215
0.335	1.19158		0.334	1.47042							0.334	-0.0240957			0.334	-0.0316913
0.336	1.17814		0.335	1.47516							0.335	-0.0259025			0.335	-0.0349139
0.337	1.14618		0.336	1.45778							0.336	-0.0271898			0.336	-0.0386375
0.338	1.09798		0.337	1.42043							0.337	-0.0276762			0.337	-0.0427504
0.339	1.03549		0.338	1.36574							0.338	-0.0272535			0.338	-0.0470717
0.34	0.95828		0.339	1.29663							0.339	-0.0260317			0.339	-0.051364
0.341	0.862368		0.34	1.21614							0.34	-0.0243522			0.34	-0.0553532
0.342	0.740536		0.341	1.12733							0.341	-0.0227322			0.341	-0.0587595
0.343	0.581884		0.342	1.03325							0.342	-0.0217542			0.342	-0.061369
0.344	0.374956		0.343	0.936923							0.343	-0.0219522			0.343	-0.0631148
0.345	0.114612		0.344	0.841264							0.344	-0.0236998			0.344	-0.0641194
0.346	-0.194947		0.345	0.748951							0.345	-0.0272074			0.345	-0.0647053
0.347	-0.541679		0.346	0.662307							0.346	-0.0326688			0.346	-0.0653301
0.348	-0.908496		0.347	0.583174							0.347	-0.0403907			0.347	-0.0664671
0.349	-1.27661		0.348	0.512812							0.348	-0.050818			0.348	-0.0685499
0.35	-1.62875		0.349	0.451884							0.349	-0.0645141			0.349	-0.0719699
0.351	-1.95109		0.35	0.400524							0.35	-0.0820892			0.35	-0.0770872
0.352	-2.2335		0.351	0.358447							0.351	-0.104085			0.351	-0.0842317
0.353	-2.46905		0.352	0.325048							0.352	-0.130928			0.352	-0.0936787
0.354	-2.65328		0.353	0.299529							0.353	-0.162942			0.353	-0.105654
0.355	-2.78399		0.354	0.281014							0.354	-0.200343			0.354	-0.120335
0.356	-2.8611		0.355	0.268607							0.355	-0.24321			0.355	-0.137735
0.357	-2.88667		0.356	0.261386							0.356	-0.291368			0.356	-0.157498
0.358	-2.8646		0.357	0.258408							0.357	-0.344133			0.357	-0.178809
0.359	-2.80017		0.358	0.258748							0.358	-0.400217			0.358	-0.200523
0.36	-2.6995		0.359	0.261509							0.359	-0.457958			0.359	-0.221423
0.361	-2.56902		0.36	0.265808							0.36	-0.515636			0.36	-0.240429
0.362	-2.41526		0.361	0.270812							0.361	-0.57167			0.361	-0.256697
0.363	-2.24462		0.362	0.275785							0.362	-0.624724			0.362	-0.269699
0.364	-2.06317		0.363	0.280093							0.363	-0.673738			0.363	-0.279244
0.365	-1.87655		0.364	0.283178							0.364	-0.717919			0.364	-0.285445
0.366	-1.68991		0.365	0.284564							0.365	-0.756714			0.365	-0.288665
0.367	-1.50774		0.366	0.283835							0.366	-0.789806			0.366	-0.289457
0.368	-1.33385		0.367	0.280603							0.367	-0.817145			0.367	-0.288491
0.369	-1.17133		0.368	0.274523							0.368	-0.838952			0.368	-0.286498
0.37	-1.02249		0.369	0.265326							0.369	-0.855695			0.369	-0.284234
0.371	-0.888899		0.37	0.252851							0.37	-0.868032			0.37	-0.282407
0.372	-0.771471		0.371	0.237054							0.371	-0.876754			0.371	-0.281621
0.373	-0.670525		0.372	0.218005							0.372	-0.882729			0.372	-0.282338
0.374	-0.585928		0.373	0.195893							0.373	-0.886808			0.373	-0.284827
0.375	-0.517153		0.374	0.171005							0.374	-0.889741			0.374	-0.289066
0.376	-0.463273		0.375	0.143692							0.375	-0.892059			0.375	-0.294679
0.377	-0.423007		0.376	0.114346							0.376	-0.893939			0.376	-0.301025
0.378	-0.39485		0.377	0.0834025							0.377	-0.895244			0.377	-0.307416
0.379	-0.377086		0.378	0.0513596							0.378	-0.895725			0.378	-0.31328
0.38	-0.36773		0.379	0.018766							0.379	-0.895183			0.379	-0.318216
0.381	-0.364703		0.38	-0.0138192							0.38	-0.893508			0.38	-0.322006
0.382	-0.366221		0.381	-0.0458659							0.381	-0.890708			0.381	-0.324608
0.383	-0.370947		0.382	-0.0768837							0.382	-0.886908			0.382	-0.326103
0.384	-0.377865		0.383	-0.106406							0.383	-0.882261			0.383	-0.326656
0.385	-0.386116		0.384	-0.133994							0.384	-0.876875			0.384	-0.326476
0.386	-0.394937		0.385	-0.159256							0.385	-0.870811			0.385	-0.325743
0.387	-0.403647		0.386	-0.181862							0.386	-0.864077			0.386	-0.324589
0.388	-0.411662		0.387	-0.201553							0.387	-0.856633			0.387	-0.323125
0.389	-0.418492		0.388	-0.218129							0.388	-0.848424			0.388	-0.321438
0.39	-0.423734		0.389	-0.23147							0.389	-0.839412			0.389	-0.319572
0.391	-0.42706		0.39	-0.241537							0.39	-0.829594			0.39	-0.317532
0.392	-0.428209		0.391	-0.24835							0.391	-0.819015			0.391	-0.315291
0.393	-0.426991		0.392	-0.251975							0.392	-0.807728			0.392	-0.312794
0.394	-0.423298		0.393	-0.252555							0.393	-0.795766			0.393	-0.309986
0.395	-0.417149		0.394	-0.250335							0.394	-0.78316			0.394	-0.306823
0.396	-0.408657		0.395	-0.245616							0.395	-0.76994			0.395	-0.30325
0.397	-0.397982		0.396	-0.238735							0.396	-0.756116			0.396	-0.299215
0.398	-0.38533		0.397	-0.230043							0.397	-0.741655			0.397	-0.294685
0.399	-0.370962		0.398	-0.21989							0.398	-0.726508			0.398	-0.289623
0.4	-0.355164		0.399	-0.208626							0.399	-0.71068			0.399	-0.283976
0.401	-0.338226		0.4	-0.196593							0.4	-0.694222			0.4	-0.277724
0.402	-0.320437		0.401	-0.184124							0.401	-0.677182			0.401	-0.270908
0.403	-0.302086		0.402	-0.171523							0.402	-0.659588			0.402	-0.263632
0.404	-0.283451		0.403	-0.159068							0.403	-0.641471			0.403	-0.256036
0.405	-0.264795		0.404	-0.147014							0.404	-0.622872			0.404	-0.248273
0.406	-0.246363		0.405	-0.135596							0.405	-0.603819			0.405	-0.240499
0.407	-0.228404		0.406	-0.125015							0.406	-0.58432			0.406	-0.232848
0.408	-0.211154		0.407	-0.115414							0.407	-0.564396			0.407	-0.225429
0.409	-0.194804		0.408	-0.106884							0.408	-0.544141			0.408	-0.21834
0.41	-0.179495		0.409	-0.0994783							0.409	-0.523701			0.409	-0.211684
0.411	-0.165313		0.41	-0.0932046							0.41	-0.503225			0.41	-0.205545
0.412	-0.152294		0.411	-0.0880187							0.411	-0.482856			0.411	-0.19996
0.413	-0.140422		0.412	-0.0838336							0.412	-0.462715			0.412	-0.19495
0.414	-0.129666		0.413	-0.0805247							0.413	-0.442905			0.413	-0.190517
0.415	-0.11999		0.414	-0.0779551							0.414	-0.42354			0.414	-0.186628
0.416	-0.111339		0.415	-0.0760105							0.415	-0.404721			0.415	-0.183209
0.417	-0.103633		0.416	-0.0745894							0.416	-0.386529			0.416	-0.180142
0.418	-0.0967805		0.417	-0.0735851							0.417	-0.369086			0.417	-0.177307
0.419	-0.0906826		0.418	-0.0728859							0.418	-0.352535			0.418	-0.174601
0.42	-0.0852305		0.419	-0.0723699							0.419	-0.337014			0.419	-0.171878
0.421	-0.0803024		0.42	-0.0719259							0.42	-0.322661			0.42	-0.168938
0.422	-0.0757778		0.421	-0.0714849							0.421	-0.309602			0.421	-0.165613
0.423	-0.0715787		0.422	-0.071013							0.422	-0.297895			0.422	-0.16182
0.424	-0.0676729		0.423	-0.0704748							0.423	-0.287516			0.423	-0.157537
0.425	-0.0640268		0.424	-0.0698141							0.424	-0.278383			0.424	-0.152793
0.426	-0.0606043		0.425	-0.0689699							0.425	-0.270393			0.425	-0.147639
0.427	-0.0573929		0.426	-0.0679017							0.426	-0.263447			0.426	-0.142122
0.428	-0.0544024		0.427	-0.0666072							0.427	-0.257457			0.427	-0.136286
0.429	-0.0516622		0.428	-0.0651279							0.428	-0.252327			0.428	-0.130191
0.43	-0.0492005		0.429	-0.0635141							0.429	-0.247937			0.429	-0.123931
0.431	-0.0470202		0.43	-0.0618025							0.43	-0.244138			0.43	-0.117616
0.432	-0.045102		0.431	-0.0600348							0.431	-0.240768			0.431	-0.111366
0.433	-0.0433979		0.432	-0.0582523							0.432	-0.237688			0.432	-0.105296
0.434	-0.0418446		0.433	-0.0564844							0.433	-0.234797			0.433	-0.0994977
0.435	-0.0403953		0.434	-0.0547627							0.434	-0.232016			0.434	-0.0940242
0.436	-0.039007		0.435	-0.0531296							0.435	-0.229267			0.435	-0.0889125
0.437	-0.0376271		0.436	-0.051626							0.436	-0.226459			0.436	-0.0841991
0.438	-0.0362047		0.437	-0.0502789							0.437	-0.223502			0.437	-0.0799174
0.439	-0.034713		0.438	-0.0490957							0.438	-0.220346			0.438	-0.0760904
0.44	-0.0331669		0.439	-0.0480732							0.439	-0.216989			0.439	-0.072735
0.441	-0.0315882		0.44	-0.047204							0.44	-0.213419			0.44	-0.0698799
0.442	-0.0299629		0.441	-0.0464554							0.441	-0.209616			0.441	-0.067568
0.443	-0.0282504		0.442	-0.0457881							0.442	-0.205614			0.442	-0.065832
0.444	-0.0264275		0.443	-0.0452							0.443	-0.201517			0.443	-0.0646807
0.445	-0.0245215		0.444	-0.0447063							0.444	-0.197433			0.444	-0.0640963
0.446	-0.022599		0.445	-0.044309							0.445	-0.193428			0.445	-0.0640301
0.447	-0.0207246		0.446	-0.0440053							0.446	-0.189564			0.446	-0.0644368
0.448	-0.0189293		0.447	-0.0438025							0.447	-0.185923			0.447	-0.0652985
0.449	-0.0172231		0.448	-0.0437127							0.448	-0.182583			0.448	-0.0665772
0.45	-0.0156286		0.449	-0.0437328							0.449	-0.179592			0.449	-0.0681939
0.451	-0.0141857		0.45	-0.0438512							0.45	-0.176972			0.45	-0.0700576
0.452	-0.0129315		0.451	-0.0440719							0.451	-0.174742			0.451	-0.0720784
0.453	-0.0118964		0.452	-0.0444007							0.452	-0.172933			0.452	-0.0741861
0.454	-0.0111163		0.453	-0.0448284							0.453	-0.171559			0.453	-0.0763521
0.455	-0.0106273		0.454	-0.0453454							0.454	-0.170586			0.454	-0.07856
0.456	-0.0104554		0.455	-0.0459427							0.455	-0.169976			0.455	-0.0807743
0.457	-0.0106237		0.456	-0.0466024							0.456	-0.169713			0.456	-0.0829616
0.458	-0.0111488		0.457	-0.0473077							0.457	-0.16978			0.457	-0.0851225
0.459	-0.0120346		0.458	-0.0480473							0.458	-0.170159			0.458	-0.0872981
0.46	-0.0132841		0.459	-0.0488149							0.459	-0.170821			0.459	-0.0895457
0.461	-0.014893		0.46	-0.0496142							0.46	-0.171722			0.46	-0.0919029
0.462	-0.0168331		0.461	-0.0504482							0.461	-0.172812			0.461	-0.0943754
0.463	-0.0190606		0.462	-0.0513205							0.462	-0.174048			0.462	-0.0969492
0.464	-0.0215447		0.463	-0.0522522							0.463	-0.175385			0.463	-0.0995955
0.465	-0.0242967		0.464	-0.0532585							0.464	-0.176783			0.464	-0.102263
0.466	-0.027351		0.465	-0.0543294							0.465	-0.178205			0.465	-0.10488
0.467	-0.0307265		0.466	-0.0554509							0.466	-0.179638			0.466	-0.107384
0.468	-0.0344055		0.467	-0.0566106							0.467	-0.181144			0.467	-0.109748
0.469	-0.0383304		0.468	-0.0577988							0.468	-0.182869			0.468	-0.111969
0.47	-0.0424412		0.469	-0.0590193							0.469	-0.184984			0.469	-0.114049
0.471	-0.0466929		0.47	-0.0602786							0.47	-0.18766			0.47	-0.11598
0.472	-0.0510323		0.471	-0.0615725							0.471	-0.191028			0.471	-0.117724
0.473	-0.0554094		0.472	-0.0628935							0.472	-0.195149			0.472	-0.119238
0.474	-0.0597827		0.473	-0.064236							0.473	-0.200032			0.473	-0.120515
0.475	-0.064045		0.474	-0.0655939							0.474	-0.205642			0.474	-0.12154
0.476	-0.067849		0.475	-0.0669626							0.475	-0.211893			0.475	-0.122279
0.477	-0.0704895		0.476	-0.0683444							0.476	-0.218682			0.476	-0.122728
0.478	-0.0711161		0.477	-0.0697519							0.477	-0.225882			0.477	-0.122897
0.479	-0.0691252		0.478	-0.0712012							0.478	-0.233351			0.478	-0.122778
0.48	-0.064352		0.479	-0.0726872							0.479	-0.240967			0.479	-0.122349
0.481	-0.0570089		0.48	-0.0741725							0.48	-0.248643			0.48	-0.121598
0.482	-0.047514		0.481	-0.0756203							0.481	-0.256332			0.481	-0.120527
0.483	-0.0363636		0.482	-0.077031							0.482	-0.264031			0.482	-0.119164
0.484	-0.0240827		0.483	-0.078427							0.483	-0.271708			0.483	-0.117533
0.485	-0.0111959		0.484	-0.0798255							0.484	-0.279229			0.484	-0.115638
0.486	0.00178184		0.485	-0.0812479							0.485	-0.286319			0.485	-0.113512
0.487	0.0143571		0.486	-0.0827294							0.486	-0.292622			0.486	-0.111232
0.488	0.0261068		0.487	-0.084297							0.487	-0.297793			0.487	-0.108861
0.489	0.0367037		0.488	-0.0859656							0.488	-0.301541			0.488	-0.106415
0.49	0.0459031		0.489	-0.0877621							0.489	-0.303654			0.489	-0.103899
0.491	0.0535495		0.49	-0.0897198							0.49	-0.304014			0.49	-0.101334
0.492	0.0595648		0.491	-0.0918538							0.491	-0.302596			0.491	-0.0987704
0.493	0.0638917		0.492	-0.0941683							0.492	-0.299463			0.492	-0.0962869
0.494	0.0664682		0.493	-0.0966786							0.493	-0.29474			0.493	-0.0939428
0.495	0.0672665		0.494	-0.0994046							0.494	-0.288619			0.494	-0.0917521
0.496	0.0663407		0.495	-0.10235							0.495	-0.281351			0.495	-0.0897118
0.497	0.0638283		0.496	-0.105511							0.496	-0.273227			0.496	-0.0878256
0.498	0.0598998		0.497	-0.108893							0.497	-0.264577			0.497	-0.0860926
0.499	0.0547335		0.498	-0.112498							0.498	-0.255732			0.498	-0.0844856
0.5	0.0485412		0.499	-0.116294							0.499	-0.246963			0.499	-0.0829627
0.501	0.0415654		0.5	-0.120234							0.5	-0.238499			0.5	-0.0814947
0.502	0.0340229		0.501	-0.124277							0.501	-0.230553			0.501	-0.0800902
0.503	0.0260713		0.502	-0.128408							0.502	-0.223295			0.502	-0.0787947
0.504	0.0178381		0.503	-0.132614							0.503	-0.216808			0.503	-0.0776321
0.505	0.00945034		0.504	-0.136851							0.504	-0.211119			0.504	-0.0765866
0.506	0.00102551		0.505	-0.141054							0.505	-0.206238			0.505	-0.0756401
0.507	-0.00734569		0.506	-0.145147							0.506	-0.202154			0.506	-0.0747713
0.508	-0.0155964		0.507	-0.149048							0.507	-0.198824			0.507	-0.0739385
0.509	-0.0236596		0.508	-0.152678							0.508	-0.196179			0.508	-0.0730946
0.51	-0.0314394		0.509	-0.155977							0.509	-0.19411			0.509	-0.0722145
0.511	-0.0388063		0.51	-0.158891							0.51	-0.192469			0.51	-0.0712845
0.512	-0.0456485		0.511	-0.161351							0.511	-0.191122			0.511	-0.0702872
0.513	-0.0519465		0.512	-0.163282							0.512	-0.189979			0.512	-0.0692278
0.514	-0.0577893		0.513	-0.164605							0.513	-0.189006			0.513	-0.0681359
0.515	-0.063325		0.514	-0.165242							0.514	-0.188182			0.514	-0.0670272
0.516	-0.0686954		0.515	-0.165127							0.515	-0.187448			0.515	-0.0658911
0.517	-0.0739812		0.516	-0.164221							0.516	-0.186704			0.516	-0.064703
0.518	-0.0791822		0.517	-0.162533							0.517	-0.185878			0.517	-0.063438
0.519	-0.0842445		0.518	-0.160123							0.518	-0.184962			0.518	-0.0620736
0.52	-0.0891128		0.519	-0.157079							0.519	-0.183974			0.519	-0.0605823
0.521	-0.0937769		0.52	-0.153491							0.52	-0.182908			0.52	-0.0589493
0.522	-0.0982585		0.521	-0.149437							0.521	-0.181731			0.521	-0.057193
0.523	-0.102557		0.522	-0.145016							0.522	-0.180402			0.522	-0.0553614
0.524	-0.106654		0.523	-0.140371							0.523	-0.178893			0.523	-0.0535197
0.525	-0.110567		0.524	-0.135631							0.524	-0.177204			0.524	-0.0517233
0.526	-0.114368		0.525	-0.130895							0.525	-0.17536			0.525	-0.0499899
0.527	-0.11816		0.526	-0.126273							0.526	-0.173401			0.526	-0.0483094
0.528	-0.122021		0.527	-0.121892							0.527	-0.171335			0.527	-0.0466576
0.529	-0.125959		0.528	-0.117861							0.528	-0.16914			0.528	-0.0449996
0.53	-0.129921		0.529	-0.114263							0.529	-0.166831			0.529	-0.0433177
0.531	-0.133832		0.53	-0.111166							0.53	-0.164449			0.53	-0.041629
0.532	-0.137609		0.531	-0.108628							0.531	-0.162023			0.531	-0.0399736
0.533	-0.141174		0.532	-0.106658							0.532	-0.159563			0.532	-0.038398
0.534	-0.144497		0.533	-0.10522							0.533	-0.157099			0.533	-0.0369327
0.535	-0.147615		0.534	-0.104262							0.534	-0.15468			0.534	-0.0355735
0.536	-0.150606		0.535	-0.103709							0.535	-0.152354			0.535	-0.034294
0.537	-0.153561		0.536	-0.103478							0.536	-0.150144			0.536	-0.0330832
0.538	-0.156562		0.537	-0.103501							0.537	-0.148057			0.537	-0.0319596
0.539	-0.15964		0.538	-0.103714							0.538	-0.14611			0.538	-0.0309509
0.54	-0.162739		0.539	-0.104039							0.539	-0.144317			0.539	-0.0300753
0.541	-0.165739		0.54	-0.1044							0.54	-0.142671			0.54	-0.0293401
0.542	-0.16852		0.541	-0.104745							0.541	-0.141136			0.541	-0.0287372
0.543	-0.170988		0.542	-0.105035							0.542	-0.139672			0.542	-0.0282368
0.544	-0.173059		0.543	-0.105244							0.543	-0.138248			0.543	-0.0278097
0.545	-0.174676		0.544	-0.105358							0.544	-0.136843			0.544	-0.0274492
0.546	-0.175836		0.545	-0.105365							0.545	-0.135442			0.545	-0.0271532
0.547	-0.176577		0.546	-0.105273							0.546	-0.134021			0.546	-0.0269106
0.548	-0.176942		0.547	-0.105102							0.547	-0.132565			0.547	-0.0267199
0.549	-0.17694		0.548	-0.104878							0.548	-0.131093			0.548	-0.0265882
0.55	-0.176541		0.549	-0.104609							0.549	-0.129634			0.549	-0.0265009
0.551	-0.175695		0.55	-0.104289							0.55	-0.128208			0.55	-0.0264234
0.552	-0.174348		0.551	-0.103911							0.551	-0.126841			0.551	-0.026336
0.553	-0.172455		0.552	-0.103473							0.552	-0.125563			0.552	-0.0262506
0.554	-0.170008		0.553	-0.102976							0.553	-0.124375			0.553	-0.0261917
0.555	-0.167066		0.554	-0.102414							0.554	-0.123221			0.554	-0.0261733
0.556	-0.163773		0.555	-0.101764							0.555	-0.122037			0.555	-0.0262028
0.557	-0.160326		0.556	-0.101009							0.556	-0.120789			0.556	-0.0262781
0.558	-0.156919		0.557	-0.100166							0.557	-0.119479			0.557	-0.0263748
0.559	-0.153687		0.558	-0.0992713							0.558	-0.118113			0.558	-0.0264573
0.56	-0.150698		0.559	-0.0983447							0.559	-0.11668			0.559	-0.0265062
0.561	-0.147952		0.56	-0.0973698							0.56	-0.115157			0.56	-0.0265152
0.562	-0.145407		0.561	-0.0963238							0.561	-0.113523			0.561	-0.0264649
0.563	-0.14302		0.562	-0.0952037							0.562	-0.111779			0.562	-0.0263295
0.564	-0.140777		0.563	-0.0940378							0.563	-0.109951			0.563	-0.0261044
0.565	-0.138714		0.564	-0.0928638							0.564	-0.108061			0.564	-0.0258081
0.566	-0.136909		0.565	-0.0917117							0.565	-0.106106			0.565	-0.0254571
0.567	-0.135449		0.566	-0.090609							0.566	-0.104071			0.566	-0.0250576
0.568	-0.134383		0.567	-0.0895767							0.567	-0.10196			0.567	-0.0246257
0.569	-0.133691		0.568	-0.0886316							0.568	-0.0997877			0.568	-0.0241683
0.57	-0.133289		0.569	-0.0877907							0.569	-0.0975577			0.569	-0.0236587
0.571	-0.133078		0.57	-0.0870558							0.57	-0.0952709			0.57	-0.0230693
0.572	-0.132966		0.571	-0.0864015							0.571	-0.0929565			0.571	-0.0223934
0.573	-0.132862		0.572	-0.0857905							0.572	-0.090682			0.572	-0.0216397
0.574	-0.132706		0.573	-0.0852051							0.573	-0.0885261			0.573	-0.0208416
0.575	-0.132499		0.574	-0.084654							0.574	-0.0865271			0.574	-0.0200221
0.576	-0.132278		0.575	-0.0841372							0.575	-0.0846805			0.575	-0.0191549
0.577	-0.132068		0.576	-0.0836193							0.576	-0.0829818			0.576	-0.0182194
0.578	-0.131848		0.577	-0.0830613							0.577	-0.0814223			0.577	-0.0172333
0.579	-0.131555		0.578	-0.0824633							0.578	-0.0799631			0.578	-0.0162052
0.58	-0.131117		0.579	-0.0818541							0.579	-0.078565			0.579	-0.0151301
0.581	-0.130474		0.58	-0.0812568							0.58	-0.0772324			0.58	-0.0140213
0.582	-0.129571		0.581	-0.0806673							0.581	-0.0759939			0.581	-0.0128937
0.583	-0.128391		0.582	-0.0800621							0.582	-0.0748743			0.582	-0.0117405
0.584	-0.126964		0.583	-0.0794292							0.583	-0.073895			0.583	-0.0105715
0.585	-0.125362		0.584	-0.0787851							0.584	-0.0730626			0.584	-0.0094204
0.586	-0.123682		0.585	-0.0781524							0.585	-0.0723702			0.585	-0.00830551
0.587	-0.122007		0.586	-0.0775329							0.586	-0.0718032			0.586	-0.0072369
0.588	-0.120379		0.587	-0.0769258							0.587	-0.0713275			0.587	-0.00623239
0.589	-0.118801		0.588	-0.0763459							0.588	-0.070897			0.588	-0.00530705
0.59	-0.117245		0.589	-0.0758145							0.589	-0.0704698			0.589	-0.00446267
0.591	-0.11567		0.59	-0.0753544							0.59	-0.0700127			0.59	-0.0036847
0.592	-0.114049		0.591	-0.0749736							0.591	-0.0695206			0.591	-0.0029629
0.593	-0.112377		0.592	-0.0746569							0.592	-0.0690353			0.592	-0.00232223
0.594	-0.110677		0.593	-0.0743742							0.593	-0.0685935			0.593	-0.001804
0.595	-0.109039		0.594	-0.0740967							0.594	-0.0681725			0.594	-0.00141154
0.596	-0.107594		0.595	-0.0738195							0.595	-0.0677268			0.595	-0.00108676
0.597	-0.106442		0.596	-0.0735639							0.596	-0.0672347			0.596	-0.000762661
0.598	-0.105603		0.597	-0.073356							0.597	-0.0666928			0.597	-0.000435401
0.599	-0.105038		0.598	-0.0732172							0.598	-0.0661081			0.598	-0.000132082
0.6	-0.104667		0.599	-0.0731615							0.599	-0.0654882			0.599	0.000159456
0.601	-0.1044		0.6	-0.0731886							0.6	-0.064829			0.6	0.000465903
0.602	-0.104161		0.601	-0.0732858							0.601	-0.0641501			0.601	0.000781999
0.603	-0.103912		0.602	-0.0734275							0.602	-0.0635105			0.602	0.00109006
0.604	-0.10367		0.603	-0.0735722							0.603	-0.0629376			0.603	0.00137838
0.605	-0.103481		0.604	-0.073683							0.604	-0.0623908			0.604	0.00163423
0.606	-0.103379		0.605	-0.0737459							0.605	-0.0618149			0.605	0.00186356
0.607	-0.103393		0.606	-0.0737692							0.606	-0.0611872			0.606	0.00209252
0.608	-0.10353		0.607	-0.0737633							0.607	-0.0604962			0.607	0.00232347
0.609	-0.103743		0.608	-0.0737201							0.608	-0.0597251			0.608	0.00254321
0.61	-0.10394		0.609	-0.0736281							0.609	-0.0588656			0.609	0.00276307
0.611	-0.104036		0.61	-0.0734836							0.61	-0.0579014			0.61	0.00300052
0.612	-0.103971		0.611	-0.0732901							0.611	-0.0568125			0.611	0.00327193
0.613	-0.103711		0.612	-0.0730646							0.612	-0.0556168			0.612	0.00361113
0.614	-0.103245		0.613	-0.0728224							0.613	-0.0543646			0.613	0.00404652
0.615	-0.102582		0.614	-0.0725694							0.614	-0.053077			0.614	0.00456869
0.616	-0.101764		0.615	-0.0723098							0.615	-0.0517354			0.615	0.0051382
0.617	-0.100869		0.616	-0.0720414							0.616	-0.050336			0.616	0.00572633
0.618	-0.0999672		0.617	-0.0717504							0.617	-0.0489034			0.617	0.0063267
0.619	-0.0990563		0.618	-0.0714108							0.618	-0.0474523			0.618	0.00693342
0.62	-0.0980671		0.619	-0.070997							0.619	-0.0459744			0.619	0.00755884
0.621	-0.0969091		0.62	-0.0705021							0.62	-0.0444669			0.62	0.00824639
0.622	-0.0955021		0.621	-0.0699389							0.621	-0.0429346			0.621	0.00903106
0.623	-0.093801		0.622	-0.0693376							0.622	-0.0413672			0.622	0.00991943
0.624	-0.0918043		0.623	-0.0687418							0.623	-0.0397482			0.623	0.0108942
0.625	-0.0895512		0.624	-0.0681794							0.624	-0.0380773			0.624	0.0119107
0.626	-0.0871316		0.625	-0.0676484							0.625	-0.0363667			0.625	0.0129141
0.627	-0.0846664		0.626	-0.0671454							0.626	-0.0346205			0.626	0.0138788
0.628	-0.0822584		0.627	-0.0666731							0.627	-0.032849			0.627	0.0148093
0.629	-0.0799688		0.628	-0.0662193							0.628	-0.03108			0.628	0.0157137
0.63	-0.0778143		0.629	-0.0657589							0.629	-0.0293203			0.629	0.0166024
0.631	-0.0757734		0.63	-0.0652746							0.63	-0.0275486			0.63	0.0174928
0.632	-0.0738047		0.631	-0.0647666							0.631	-0.0257481			0.631	0.0183934
0.633	-0.0718796		0.632	-0.064252							0.632	-0.0239166			0.632	0.0192918
0.634	-0.070009		0.633	-0.0637505							0.633	-0.0220619			0.633	0.0201678
0.635	-0.0682493		0.634	-0.0632683							0.634	-0.0202036			0.634	0.021004
0.636	-0.0666913		0.635	-0.062819							0.635	-0.0183777			0.635	0.0217869
0.637	-0.0654222		0.636	-0.0624298							0.636	-0.016623			0.636	0.0225159
0.638	-0.0644874		0.637	-0.0621002							0.637	-0.0149736			0.637	0.0232055
0.639	-0.0638856		0.638	-0.0618021							0.638	-0.0134698			0.638	0.023869
0.64	-0.0635734		0.639	-0.0615271							0.639	-0.0121324			0.639	0.0244975
0.641	-0.0634819		0.64	-0.0612832							0.64	-0.0109394			0.64	0.0250639
0.642	-0.0635498		0.641	-0.061054							0.641	-0.00985751			0.641	0.0255432
0.643	-0.0637301		0.642	-0.0608056							0.642	-0.00886597			0.642	0.0259206
0.644	-0.063976		0.643	-0.0605235							0.643	-0.00795366			0.643	0.0261945
0.645	-0.064249		0.644	-0.0602289							0.644	-0.00712201			0.644	0.0263615
0.646	-0.0645394		0.645	-0.0599565							0.645	-0.00638137			0.645	0.0264117
0.647	-0.0648754		0.646	-0.0597212							0.646	-0.00573868			0.646	0.0263674
0.648	-0.0653154		0.647	-0.0595093							0.647	-0.00519595			0.647	0.0262837
0.649	-0.0659022		0.648	-0.0593063							0.648	-0.00474772			0.648	0.0261937
0.65	-0.0666277		0.649	-0.0591309							0.649	-0.00436046			0.649	0.0260789
0.651	-0.0674501		0.65	-0.0590166							0.65	-0.00398633			0.65	0.0259034
0.652	-0.0682923		0.651	-0.0589731							0.651	-0.00361495			0.651	0.0256537
0.653	-0.069052		0.652	-0.0589887							0.652	-0.00327145			0.652	0.0253321
0.654	-0.0696619		0.653	-0.0590472							0.653	-0.00296584			0.653	0.0249586
0.655	-0.0701172		0.654	-0.0591421							0.654	-0.00268265			0.654	0.024572
0.656	-0.0704597		0.655	-0.0592776							0.655	-0.00241831			0.655	0.0241995
0.657	-0.0707471		0.656	-0.0594492							0.656	-0.00218346			0.656	0.0238624
0.658	-0.0710323		0.657	-0.0596333							0.657	-0.0019707			0.657	0.0235856
0.659	-0.0713514		0.658	-0.0597896							0.658	-0.00176563			0.658	0.0233655
0.66	-0.0717047		0.659	-0.0598921							0.659	-0.00157174			0.659	0.0231753
0.661	-0.0720633		0.66	-0.0599609							0.66	-0.00138682			0.66	0.0229975
0.662	-0.0723866		0.661	-0.0600333							0.661	-0.00117786			0.661	0.0228356
0.663	-0.0726229		0.662	-0.0601216							0.662	-0.00091126			0.662	0.0227045
0.664	-0.0727248		0.663	-0.0602181							0.663	-0.000592334			0.663	0.0226161
0.665	-0.0726808		0.664	-0.0603262							0.664	-0.000255584			0.664	0.0225782
0.666	-0.0725278		0.665	-0.060451							0.665	7.07594e-05			0.665	0.0225835
0.667	-0.0723296		0.666	-0.0605847							0.666	0.000367793			0.666	0.0225959
0.668	-0.0721294		0.667	-0.060718							0.667	0.000616646			0.667	0.0225817
0.669	-0.0719334		0.668	-0.0608401							0.668	0.000820038			0.668	0.0225457
0.67	-0.0717316		0.669	-0.0609297							0.669	0.00100738			0.669	0.0225143
0.671	-0.0714983		0.67	-0.0609663							0.67	0.00122399			0.67	0.0225037
0.672	-0.0711964		0.671	-0.0609471							0.671	0.00152418			0.671	0.0225182
0.673	-0.0708007		0.672	-0.060881							0.672	0.00194471			0.672	0.0225509
0.674	-0.0702971		0.673	-0.0607673							0.673	0.0024932			0.673	0.0225737
0.675	-0.0696764		0.674	-0.0605998							0.674	0.00315364			0.674	0.0225573
0.676	-0.0689425		0.675	-0.0603815							0.675	0.00388819			0.675	0.0225154
0.677	-0.0681211		0.676	-0.0601168							0.676	0.00464913			0.676	0.0224996
0.678	-0.06727		0.677	-0.0598106							0.677	0.00539463			0.677	0.0225381
0.679	-0.066471		0.678	-0.059475							0.678	0.00609187			0.678	0.0226292
0.68	-0.0657788		0.679	-0.0591211							0.679	0.00670539			0.679	0.02279
0.681	-0.065157		0.68	-0.0587563							0.68	0.00720624			0.68	0.0230486
0.682	-0.0644821		0.681	-0.0583966							0.681	0.00760343			0.681	0.0233996
0.683	-0.0636428		0.682	-0.0580652							0.682	0.00793373			0.682	0.0238084
0.684	-0.0626179		0.683	-0.0577709							0.683	0.00821414			0.683	0.0242385
0.685	-0.0614533		0.684	-0.0575117							0.684	0.00842976			0.684	0.0246745
0.686	-0.0602065		0.685	-0.0572875							0.685	0.00856524			0.685	0.0251258
0.687	-0.0589419		0.686	-0.0570852							0.686	0.00862561			0.686	0.0255895
0.688	-0.057753		0.687	-0.0568749							0.687	0.00862833			0.687	0.0260471
0.689	-0.056741		0.688	-0.0566397							0.688	0.00859957			0.688	0.0264843
0.69	-0.0559593		0.689	-0.0563901							0.689	0.0085811			0.689	0.0268767
0.691	-0.0553834		0.69	-0.0561412							0.69	0.00860784			0.69	0.0271978
0.692	-0.0549295		0.691	-0.0558958							0.691	0.00868418			0.691	0.0274307
0.693	-0.0545016		0.692	-0.0556477							0.692	0.00881324			0.692	0.0275517
0.694	-0.0540325		0.693	-0.0553923							0.693	0.00901037			0.693	0.0275291
0.695	-0.053508		0.694	-0.0551391							0.694	0.00928195			0.694	0.0273393
0.696	-0.0529632		0.695	-0.0549143							0.695	0.00961908			0.695	0.0269977
0.697	-0.0524517		0.696	-0.0547508							0.696	0.00998225			0.696	0.0265537
0.698	-0.0520307		0.697	-0.0546541							0.697	0.0103249			0.697	0.0260386
0.699	-0.0517667		0.698	-0.0545998							0.698	0.0106404			0.698	0.0254566
0.7	-0.0517016		0.699	-0.0545741							0.699	0.0109408			0.699	0.0248282
0.701	-0.0518075		0.7	-0.054576							0.7	0.0112321			0.7	0.0241997
0.702	-0.0520135		0.701	-0.0546039							0.701	0.0115186			0.701	0.0235881
0.703	-0.0522549		0.702	-0.0546633							0.702	0.0117888			0.702	0.0229662
0.704	-0.0524812		0.703	-0.0547526							0.703	0.0120128			0.703	0.0223159
0.705	-0.0526582		0.704	-0.054843							0.704	0.0121777			0.704	0.0216463
0.706	-0.0527703		0.705	-0.0548934							0.705	0.0123004			0.705	0.0209893
0.707	-0.0528262		0.706	-0.0548778							0.706	0.0124095			0.706	0.0204083
0.708	-0.0528674		0.707	-0.0547996							0.707	0.012518			0.707	0.0199771
0.709	-0.0529459		0.708	-0.0546832							0.708	0.0126131			0.708	0.0197449
0.71	-0.0530992		0.709	-0.0545388							0.709	0.0126896			0.709	0.0197174
0.711	-0.0533443		0.71	-0.0543507							0.71	0.0127649			0.71	0.0198542
0.712	-0.0536696		0.711	-0.0540986							0.711	0.0128472			0.711	0.0200948
0.713	-0.0540259		0.712	-0.0537661							0.712	0.0129462			0.712	0.0203982
0.714	-0.0543484		0.713	-0.0533464							0.713	0.0131168			0.713	0.020768
0.715	-0.0545879		0.714	-0.0528585							0.714	0.0134306			0.714	0.0212277
0.716	-0.0547148		0.715	-0.0523363							0.715	0.0139165			0.715	0.0217682
0.717	-0.0547263		0.716	-0.0518046							0.716	0.0145568			0.716	0.022353
0.718	-0.0546436		0.717	-0.0512843							0.717	0.0153159			0.717	0.0229595
0.719	-0.0544968		0.718	-0.050796							0.718	0.0161654			0.718	0.0235797
0.72	-0.054337		0.719	-0.0503468							0.719	0.0170878			0.719	0.0241951
0.721	-0.0542265		0.72	-0.049933							0.72	0.0180699			0.72	0.0247793
0.722	-0.0541863		0.721	-0.0495602							0.721	0.0190943			0.721	0.0253183
0.723	-0.0541867		0.722	-0.0492385							0.722	0.0201397			0.722	0.0258197
0.724	-0.0541909		0.723	-0.0489614							0.723	0.0211865			0.723	0.0263142
0.725	-0.05417		0.724	-0.0487048							0.724	0.0222014			0.724	0.0268423
0.726	-0.0540828		0.725	-0.0484423							0.725	0.0231396			0.725	0.0274183
0.727	-0.0538869		0.726	-0.0481541							0.726	0.0239692			0.726	0.0280228
0.728	-0.0535752		0.727	-0.0478312							0.727	0.0246876			0.727	0.028635
0.729	-0.0531722		0.728	-0.0474891							0.728	0.0253087			0.728	0.0292474
0.73	-0.0527116		0.729	-0.0471567							0.729	0.0258425			0.729	0.0298619
0.731	-0.0522346		0.73	-0.0468335							0.73	0.0263093			0.73	0.030486
0.732	-0.0517698		0.731	-0.0464927							0.731	0.0267499			0.731	0.0311177
0.733	-0.0513231		0.732	-0.0461217							0.732	0.0271925			0.732	0.0317564
0.734	-0.0509037		0.733	-0.0457114							0.733	0.0276373			0.733	0.0324326
0.735	-0.0505249		0.734	-0.045253							0.734	0.0280673			0.734	0.0331735
0.736	-0.0501846		0.735	-0.0447699							0.735	0.028462			0.735	0.0339591
0.737	-0.0498724		0.736	-0.0443104							0.736	0.0288084			0.736	0.0347401
0.738	-0.0495728		0.737	-0.0439052							0.737	0.029108			0.737	0.0354771
0.739	-0.049267		0.738	-0.0435544							0.738	0.0293693			0.738	0.0361461
0.74	-0.0489388		0.739	-0.0432539							0.739	0.0295913			0.739	0.0367346
0.741	-0.0485848		0.74	-0.0430178							0.74	0.0297558			0.74	0.0372491
0.742	-0.0482307		0.741	-0.0428606							0.741	0.0298308			0.741	0.0377075
0.743	-0.0479165		0.742	-0.0427677							0.742	0.0297777			0.742	0.0381198
0.744	-0.0476542		0.743	-0.0427092							0.743	0.0295768			0.743	0.0384809
0.745	-0.0474207		0.744	-0.0426651							0.744	0.0292504			0.744	0.0387634
0.746	-0.0471858		0.745	-0.0426145							0.745	0.0288501			0.745	0.0389358
0.747	-0.0469358		0.746	-0.0425359							0.746	0.0284366			0.746	0.0389857
0.748	-0.0466678		0.747	-0.0424276							0.747	0.0280594			0.747	0.0389147
0.749	-0.0463543		0.748	-0.0423022							0.748	0.0277282			0.748	0.038716
0.75	-0.0459486		0.749	-0.0421774							0.749	0.0274167			0.749	0.0383687
0.751	-0.0454564		0.75	-0.0420815							0.75	0.0271018			0.75	0.0378741
0.752	-0.0449665		0.751	-0.0420255							0.751	0.0267771			0.751	0.0372718
0.753	-0.0445789		0.752	-0.0419724							0.752	0.0264507			0.752	0.0366007
0.754	-0.0443202		0.753	-0.0418776							0.753	0.0261638			0.753	0.0358703
0.755	-0.044155		0.754	-0.041739							0.754	0.0259768			0.754	0.0350689
0.756	-0.0440404		0.755	-0.0415848							0.755	0.0259133			0.755	0.0342016
0.757	-0.0439291		0.756	-0.0414403							0.756	0.0259514			0.756	0.0333044
0.758	-0.043776		0.757	-0.0413194							0.757	0.0260533			0.757	0.0324275
0.759	-0.0435715		0.758	-0.0412247							0.758	0.0261766			0.758	0.0316241
0.76	-0.0433424		0.759	-0.0411534							0.759	0.026284			0.759	0.0309318
0.761	-0.0431287		0.76	-0.0411163							0.76	0.0263574			0.76	0.0303655
0.762	-0.0429692		0.761	-0.0411378							0.761	0.0263947			0.761	0.0299226
0.763	-0.042896		0.762	-0.041232							0.762	0.0263942			0.762	0.0295846
0.764	-0.0429282		0.763	-0.04138							0.763	0.0263532			0.763	0.0293276
0.765	-0.0430567		0.764	-0.04154							0.764	0.0262826			0.764	0.0291201
0.766	-0.0432325		0.765	-0.0416845							0.765	0.0261793			0.765	0.0289508
0.767	-0.0433837		0.766	-0.041815							0.766	0.0260132			0.766	0.0288418
0.768	-0.0434595		0.767	-0.0419453							0.767	0.0257816			0.767	0.0288103
0.769	-0.0434545		0.768	-0.0420667							0.768	0.0255215			0.768	0.0288608
0.77	-0.0433901		0.769	-0.0421378							0.769	0.0252612			0.769	0.0289956
0.771	-0.043283		0.77	-0.0421198							0.77	0.025025			0.77	0.0292107
0.772	-0.0431437		0.771	-0.0420061							0.771	0.0248715			0.771	0.0294833
0.773	-0.042989		0.772	-0.0418201							0.772	0.0248576			0.772	0.0297781
0.774	-0.0428291		0.773	-0.041596							0.773	0.0249797			0.773	0.0300829
0.775	-0.0426592		0.774	-0.0413577							0.774	0.0251925			0.774	0.0304116
0.776	-0.0424752		0.775	-0.0411067							0.775	0.0254544			0.775	0.0307687
0.777	-0.042277		0.776	-0.0408293							0.776	0.0257395			0.776	0.031137
0.778	-0.0420488		0.777	-0.0405148							0.777	0.0260177			0.777	0.0314953
0.779	-0.0417737		0.778	-0.0401623							0.778	0.0262387			0.778	0.0318418
0.78	-0.0414675		0.779	-0.0397632							0.779	0.0263666			0.779	0.0321959
0.781	-0.041157		0.78	-0.0393042							0.78	0.0264259			0.78	0.032582
0.782	-0.0408463		0.781	-0.0388119							0.781	0.0264581			0.781	0.0330169
0.783	-0.0405346		0.782	-0.0383507							0.782	0.0264627			0.782	0.0335063
0.784	-0.0402412		0.783	-0.0379566							0.783	0.0264246			0.783	0.0340531
0.785	-0.0399919		0.784	-0.0376183							0.784	0.0263398			0.784	0.0346566
0.786	-0.0397962		0.785	-0.0373083							0.785	0.0262017			0.785	0.0352902
0.787	-0.0396484		0.786	-0.0370083							0.786	0.0260004			0.786	0.0358912
0.788	-0.0395347		0.787	-0.0367144							0.787	0.0257396			0.787	0.0363836
0.789	-0.0394398		0.788	-0.0364221							0.788	0.0254536			0.788	0.0367242
0.79	-0.0393399		0.789	-0.0361305							0.789	0.025191			0.789	0.0369216
0.791	-0.0392036		0.79	-0.0358557							0.79	0.0249844			0.79	0.0370282
0.792	-0.0390149		0.791	-0.0356128							0.791	0.0248439			0.791	0.0371133
0.793	-0.0387773		0.792	-0.0354027							0.792	0.0247592			0.792	0.0372197
0.794	-0.0385154		0.793	-0.0352274							0.793	0.0247105			0.793	0.0373541
0.795	-0.0382771		0.794	-0.0351027							0.794	0.02469			0.794	0.0375156
0.796	-0.0381068		0.795	-0.035049							0.795	0.0247028			0.795	0.0377051
0.797	-0.0380351		0.796	-0.0350771							0.796	0.0247436			0.796	0.0379113
0.798	-0.038065		0.797	-0.0351747							0.797	0.0247715			0.797	0.0381205
0.799	-0.0381538		0.798	-0.0353134							0.798	0.0247288			0.798	0.0383316
0.8	-0.0382368		0.799	-0.0354699							0.799	0.024592			0.799	0.0385345
0.801	-0.0382598		0.8	-0.0356245							0.8	0.0243737			0.8	0.0386938
0.802	-0.0381923		0.801	-0.0357553							0.801	0.02409			0.801	0.0387984
0.803	-0.0380351		0.802	-0.0358525							0.802	0.023744			0.802	0.0388913
0.804	-0.0378148		0.803	-0.0359181							0.803	0.0233286			0.803	0.0390062
0.805	-0.0375635		0.804	-0.0359524							0.804	0.0228462			0.804	0.0391223
0.806	-0.0373128		0.805	-0.0359547							0.805	0.022316			0.805	0.0391944
0.807	-0.0371072		0.806	-0.035922							0.806	0.0217708			0.806	0.0391944
0.808	-0.0369872		0.807	-0.0358504							0.807	0.021255			0.807	0.0391182
0.809	-0.0369518		0.808	-0.0357452							0.808	0.0208078			0.808	0.0389708
0.81	-0.0369678		0.809	-0.0356066							0.809	0.0204553			0.809	0.038759
0.811	-0.0369935		0.81	-0.0354193							0.81	0.0202141			0.81	0.0384905
0.812	-0.0369813		0.811	-0.0351705							0.811	0.0200718			0.811	0.0381838
0.813	-0.0369016		0.812	-0.0348624							0.812	0.0199756			0.812	0.0378661
0.814	-0.0367684		0.813	-0.0345041							0.813	0.0198789			0.813	0.0375637
0.815	-0.0366201		0.814	-0.0340987							0.814	0.0197915			0.814	0.0373048
0.816	-0.0364862		0.815	-0.0336392							0.815	0.0197548			0.815	0.0371293
0.817	-0.036384		0.816	-0.0331255							0.816	0.0197934			0.816	0.0370786
0.818	-0.0363256		0.817	-0.0325769							0.817	0.0199023			0.817	0.0371601
0.819	-0.0363088		0.818	-0.0320101							0.818	0.0200505			0.818	0.0373499
0.82	-0.0363101		0.819	-0.0314136							0.819	0.020203			0.819	0.037627
0.821	-0.0362945		0.82	-0.0307778							0.82	0.0203506			0.82	0.0379823
0.822	-0.0362401		0.821	-0.0301369							0.821	0.0205141			0.821	0.0383996
0.823	-0.0361465		0.822	-0.0295369							0.822	0.0207028			0.822	0.0388497
0.824	-0.0360063		0.823	-0.028988							0.823	0.0208936			0.823	0.0393206
0.825	-0.0357989		0.824	-0.0284909							0.824	0.0210652			0.824	0.0398289
0.826	-0.0355111		0.825	-0.0280606							0.825	0.0212157			0.825	0.0403869
0.827	-0.0351567		0.826	-0.0277058							0.826	0.0213595			0.826	0.0409802
0.828	-0.0347934		0.827	-0.0274235							0.827	0.0215126			0.827	0.041593
0.829	-0.0344907		0.828	-0.0271833							0.828	0.0216797			0.828	0.0422265
0.83	-0.0342727		0.829	-0.0269279							0.829	0.0218613			0.829	0.0428762
0.831	-0.0341191		0.83	-0.0266277							0.83	0.0220636			0.83	0.0435401
0.832	-0.0339981		0.831	-0.0263047							0.831	0.022307			0.831	0.0442193
0.833	-0.0338879		0.832	-0.0260029							0.832	0.0226028			0.832	0.0448668
0.834	-0.0337712		0.833	-0.0257614							0.833	0.0229236			0.833	0.045416
0.835	-0.0336219		0.834	-0.0256003							0.834	0.0232257			0.834	0.045863
0.836	-0.0334274		0.835	-0.0255119							0.835	0.0234707			0.835	0.046254
0.837	-0.0332012		0.836	-0.0254664							0.836	0.0236318			0.836	0.0466095
0.838	-0.0329496		0.837	-0.0254322							0.837	0.0237028			0.837	0.0469003
0.839	-0.0326661		0.838	-0.0253954							0.838	0.0236866			0.838	0.0470736
0.84	-0.032358		0.839	-0.0253506							0.839	0.0235811			0.839	0.0470975
0.841	-0.0320618		0.84	-0.025283							0.84	0.0233886			0.84	0.0469969
0.842	-0.0318248		0.841	-0.0251788							0.841	0.0231243			0.841	0.0468333
0.843	-0.031668		0.842	-0.0250498							0.842	0.0228043			0.842	0.0466419
0.844	-0.0315703		0.843	-0.0249314							0.843	0.0224309			0.843	0.0464129
0.845	-0.0314836		0.844	-0.0248581							0.844	0.0220015			0.844	0.046125
0.846	-0.0313754		0.845	-0.0248441							0.845	0.0215285			0.845	0.0457715
0.847	-0.0312478		0.846	-0.0248911							0.846	0.0210329			0.846	0.0453637
0.848	-0.0311066		0.847	-0.0249976							0.847	0.0205147			0.847	0.044929
0.849	-0.0309442		0.848	-0.0251551							0.848	0.0199594			0.848	0.0445077
0.85	-0.0307596		0.849	-0.0253544							0.849	0.0193836			0.849	0.0441224
0.851	-0.0305782		0.85	-0.0255867							0.85	0.0188238			0.85	0.0437702
0.852	-0.0304424		0.851	-0.0258411							0.851	0.0182932			0.851	0.04344
0.853	-0.0303862		0.852	-0.0260985							0.852	0.0177977			0.852	0.0431053
0.854	-0.0304269		0.853	-0.0263263							0.853	0.0173618			0.853	0.0427445
0.855	-0.0305696		0.854	-0.0264942							0.854	0.0170062			0.854	0.0423577
0.856	-0.0307936		0.855	-0.0266029							0.855	0.0167334			0.855	0.0419464
0.857	-0.0310587		0.856	-0.026686							0.856	0.0165201			0.856	0.0415092
0.858	-0.0313299		0.857	-0.0267832							0.857	0.0163151			0.857	0.0410448
0.859	-0.0315781		0.858	-0.026911							0.858	0.0160909			0.858	0.0405459
0.86	-0.0317733		0.859	-0.0270564							0.859	0.0158579			0.859	0.0399991
0.861	-0.0318821		0.86	-0.0271988							0.86	0.0156057			0.86	0.039409
0.862	-0.0318875		0.861	-0.0273326							0.861	0.0153093			0.861	0.0387985
0.863	-0.0318197		0.862	-0.0274551							0.862	0.0149811			0.862	0.0381695
0.864	-0.0317335		0.863	-0.0275438							0.863	0.0146577			0.863	0.0375244
0.865	-0.0316511		0.864	-0.0275707							0.864	0.0143572			0.864	0.036914
0.866	-0.0315558		0.865	-0.0275334							0.865	0.0140714			0.865	0.0364006
0.867	-0.0314361		0.866	-0.0274545							0.866	0.0137954			0.866	0.036005
0.868	-0.0312916		0.867	-0.0273605							0.867	0.0135404			0.867	0.0357252
0.869	-0.0311091		0.868	-0.0272664							0.868	0.0133159			0.868	0.0355751
0.87	-0.0308678		0.869	-0.027172							0.869	0.0131381			0.869	0.0355518
0.871	-0.0305597		0.87	-0.0270731							0.87	0.0130318			0.87	0.035606
0.872	-0.0302035		0.871	-0.0269642							0.871	0.0130009			0.871	0.0357027
0.873	-0.0298442		0.872	-0.0268366							0.872	0.0130209			0.872	0.0358416
0.874	-0.0295376		0.873	-0.0266935							0.873	0.0130497			0.873	0.0360087
0.875	-0.0293313		0.874	-0.0265465							0.874	0.013052			0.874	0.0361892
0.876	-0.0292487		0.875	-0.0264048							0.875	0.0130204			0.875	0.0364073
0.877	-0.0292851		0.876	-0.0262708							0.876	0.0129711			0.876	0.0366964
0.878	-0.0294082		0.877	-0.0261419							0.877	0.0129318			0.877	0.0370421
0.879	-0.0295671		0.878	-0.0260127							0.878	0.0129202			0.878	0.0373878
0.88	-0.029708		0.879	-0.0258719							0.879	0.0129217			0.879	0.0376882
0.881	-0.0297816		0.88	-0.0257082							0.88	0.0129086			0.88	0.0379236
0.882	-0.0297632		0.881	-0.0255255							0.881	0.0128681			0.881	0.0380941
0.883	-0.0296634		0.882	-0.0253485							0.882	0.0127786			0.882	0.0382123
0.884	-0.0295079		0.883	-0.0252149							0.883	0.0126009			0.883	0.0382827
0.885	-0.0293233		0.884	-0.0251568							0.884	0.0123207			0.884	0.0383062
0.886	-0.0291353		0.885	-0.0251807							0.885	0.0119745			0.885	0.0382936
0.887	-0.0289698		0.886	-0.0252678							0.886	0.0116216			0.886	0.038262
0.888	-0.0288477		0.887	-0.0253884							0.887	0.0112938			0.887	0.0382403
0.889	-0.0287676		0.888	-0.025508							0.888	0.01098			0.888	0.0382429
0.89	-0.0287078		0.889	-0.025595							0.889	0.0106462			0.889	0.0382496
0.891	-0.0286539		0.89	-0.0256366							0.89	0.0102665			0.89	0.0382406
0.892	-0.0286058		0.891	-0.0256476							0.891	0.00985804			0.891	0.0382088
0.893	-0.0285579		0.892	-0.0256516							0.892	0.00947018			0.892	0.0381403
0.894	-0.0285036		0.893	-0.0256596							0.893	0.00912772			0.893	0.0380142
0.895	-0.0284506		0.894	-0.025677							0.894	0.00882254			0.894	0.0378195
0.896	-0.0284102		0.895	-0.0257143							0.895	0.00854448			0.895	0.0375512
0.897	-0.0284083		0.896	-0.0257819							0.896	0.00828404			0.896	0.0372103
0.898	-0.0284929		0.897	-0.0258909							0.897	0.00802426			0.897	0.0368174
0.899	-0.0286905		0.898	-0.026053							0.898	0.00775153			0.898	0.0363897
0.9	-0.0289795		0.899	-0.0262647							0.899	0.00746215			0.899	0.0359208
0.901	-0.0293264		0.9	-0.0265059							0.9	0.00715868			0.9	0.0354029
0.902	-0.0296955		0.901	-0.0267624							0.901	0.00685547			0.901	0.0348505
0.903	-0.0300288		0.902	-0.0270371							0.902	0.00658511			0.902	0.0343056
0.904	-0.0302819		0.903	-0.0273293							0.903	0.00638731			0.903	0.0338171
0.905	-0.030454		0.904	-0.0276174							0.904	0.00627872			0.904	0.0334005
0.906	-0.0305579		0.905	-0.0278687							0.905	0.00624189			0.905	0.0330387
0.907	-0.0305981		0.906	-0.0280611							0.906	0.00625594			0.906	0.0327122
0.908	-0.0305878		0.907	-0.028204							0.907	0.00631713			0.907	0.0323939
0.909	-0.0305684		0.908	-0.0283314							0.908	0.00641481			0.908	0.0320482
0.91	-0.0305837		0.909	-0.0284752							0.909	0.0065138			0.909	0.03166
0.911	-0.0306329		0.91	-0.028649							0.91	0.00657588			0.91	0.0312411
0.912	-0.0306609		0.911	-0.0288239							0.911	0.00658835			0.911	0.0308038
0.913	-0.0306016		0.912	-0.028946							0.912	0.00657393			0.912	0.030354
0.914	-0.0304296		0.913	-0.0289974							0.913	0.00656998			0.913	0.0299091
0.915	-0.0301559		0.914	-0.0290035							0.914	0.00658978			0.914	0.029505
0.916	-0.0298022		0.915	-0.0289964							0.915	0.00661567			0.915	0.0291926
0.917	-0.0294058		0.916	-0.0289842							0.916	0.00663929			0.916	0.0290014
0.918	-0.0290153		0.917	-0.0289526							0.917	0.00669451			0.917	0.0289047
0.919	-0.0286776		0.918	-0.0288951							0.918	0.00681846			0.918	0.0288586
0.92	-0.028442		0.919	-0.0288102							0.919	0.00698906			0.919	0.0288521
0.921	-0.0283364		0.92	-0.0286925							0.92	0.00714966			0.92	0.0288906
0.922	-0.028341		0.921	-0.0285511							0.921	0.00727034			0.921	0.0289659
0.923	-0.0284068		0.922	-0.0284011							0.922	0.00734819			0.922	0.0290622
0.924	-0.0284747		0.923	-0.0282359							0.923	0.007379			0.923	0.029178
0.925	-0.0284965		0.924	-0.0280423							0.924	0.00735222			0.924	0.0293271
0.926	-0.0284713		0.925	-0.0278328							0.925	0.00726234			0.925	0.0295132
0.927	-0.0284394		0.926	-0.0276334							0.926	0.00711893			0.926	0.0297187
0.928	-0.0284431		0.927	-0.0274625							0.927	0.00695426			0.927	0.0299276
0.929	-0.0285059		0.928	-0.0273343							0.928	0.00680523			0.928	0.0301436
0.93	-0.028629		0.929	-0.0272532							0.929	0.00669034			0.929	0.0303727
0.931	-0.0287902		0.93	-0.0272066							0.93	0.00661172			0.93	0.0305875
0.932	-0.0289603		0.931	-0.0271716							0.931	0.00655828			0.931	0.0307235
0.933	-0.0291245		0.932	-0.0271345							0.932	0.00652211			0.932	0.0307242
0.934	-0.0292722		0.933	-0.027105							0.933	0.00648104			0.933	0.0305796
0.935	-0.0293838		0.934	-0.0271008							0.934	0.00637399			0.934	0.0303194
0.936	-0.0294505		0.935	-0.0271332							0.935	0.0061727			0.935	0.0299912
0.937	-0.0294813		0.936	-0.0272145							0.936	0.00590889			0.936	0.0296395
0.938	-0.0294979		0.937	-0.0273477							0.937	0.00560847			0.937	0.0292802
0.939	-0.029551		0.938	-0.0275126							0.938	0.00527442			0.938	0.0289032
0.94	-0.0296933		0.939	-0.0276832							0.939	0.00489398			0.939	0.0285113
0.941	-0.0299367		0.94	-0.0278486							0.94	0.00444715			0.94	0.0281315
0.942	-0.0302735		0.941	-0.028023							0.941	0.00393489			0.941	0.0277743
0.943	-0.0306883		0.942	-0.0282293							0.942	0.0033762			0.942	0.0274075
0.944	-0.0311442		0.943	-0.0284688							0.943	0.00277723			0.943	0.0269803
0.945	-0.0315952		0.944	-0.0287193							0.944	0.00211241			0.944	0.0264563
0.946	-0.0320102		0.945	-0.0289652							0.945	0.00135224			0.945	0.0258239
0.947	-0.0323968		0.946	-0.0292077							0.946	0.000504696			0.946	0.0251024
0.948	-0.0327801		0.947	-0.0294639							0.947	-0.000403303			0.947	0.024326
0.949	-0.0331494		0.948	-0.0297633							0.948	-0.00134312			0.948	0.0235087
0.95	-0.03348		0.949	-0.0301265							0.949	-0.00227291			0.949	0.0226349
0.951	-0.0337883		0.95	-0.0305463							0.95	-0.00316439			0.95	0.0216805
0.952	-0.03411		0.951	-0.0309935							0.951	-0.00401053			0.951	0.0206367
0.953	-0.0344559		0.952	-0.0314528							0.952	-0.00480264			0.952	0.0195214
0.954	-0.0348093		0.953	-0.0319391							0.953	-0.00554349			0.953	0.0183653
0.955	-0.035143		0.954	-0.0324566							0.954	-0.00624807			0.954	0.0171924
0.956	-0.0354325		0.955	-0.0329885							0.955	-0.00691799			0.955	0.0160275
0.957	-0.0356601		0.956	-0.0335345							0.956	-0.00754416			0.956	0.0149079
0.958	-0.0358261		0.957	-0.0341081							0.957	-0.00813192			0.957	0.0138747
0.959	-0.0359565		0.958	-0.0347024							0.958	-0.00869733			0.958	0.0129578
0.96	-0.0361046		0.959	-0.0352921							0.959	-0.00923599			0.959	0.0121444
0.961	-0.0363427		0.96	-0.035866							0.96	-0.00972231			0.96	0.0113874
0.962	-0.0367085		0.961	-0.0364198							0.961	-0.010139			0.961	0.0106741
0.963	-0.0371829		0.962	-0.03693							0.962	-0.0104892			0.962	0.0100258
0.964	-0.0377224		0.963	-0.0373767							0.963	-0.0107812			0.963	0.00944372
0.965	-0.0382577		0.964	-0.0377595							0.964	-0.0110054			0.964	0.00891643
0.966	-0.0387063		0.965	-0.0380705							0.965	-0.0111325			0.965	0.00844432
0.967	-0.0390281		0.966	-0.0382844							0.966	-0.0111447			0.966	0.00802807
0.968	-0.0392337		0.967	-0.0383842							0.967	-0.0110547			0.967	0.00766226
0.969	-0.0393499		0.968	-0.0383879							0.968	-0.0108917			0.968	0.00735415
0.97	-0.0394061		0.969	-0.0383334							0.969	-0.0106785			0.969	0.00713407
0.971	-0.0394434		0.97	-0.0382381							0.97	-0.0104092			0.97	0.00702914
0.972	-0.0395011		0.971	-0.0380952							0.971	-0.0100668			0.971	0.00704116
0.973	-0.039581		0.972	-0.0379045							0.972	-0.00965762			0.972	0.00716383
0.974	-0.0396552		0.973	-0.0376823							0.973	-0.00919438			0.973	0.00739265
0.975	-0.0397152		0.974	-0.0374521							0.974	-0.00867722			0.974	0.00771136
0.976	-0.0397736		0.975	-0.0372387							0.975	-0.00811889			0.975	0.00808604
0.977	-0.0398342		0.976	-0.0370517							0.976	-0.00755801			0.976	0.00847638
0.978	-0.0398813		0.977	-0.0368849							0.977	-0.00703447			0.977	0.00885507
0.979	-0.039893		0.978	-0.0367362							0.978	-0.0065663			0.978	0.00920947
0.98	-0.0398611		0.979	-0.0366054							0.979	-0.00616117			0.979	0.00952947
0.981	-0.039793		0.98	-0.036485							0.98	-0.00583821			0.98	0.00979822
0.982	-0.0397012		0.981	-0.0363713							0.981	-0.00561612			0.981	0.00999207
0.983	-0.0395988		0.982	-0.036269							0.982	-0.00549487			0.982	0.010093
0.984	-0.039498		0.983	-0.0361873							0.983	-0.00545762			0.983	0.0101007
0.985	-0.0394163		0.984	-0.0361281							0.984	-0.00547987			0.984	0.0100406
0.986	-0.0393696		0.985	-0.0360851							0.985	-0.00554134			0.985	0.00994916
0.987	-0.0393479		0.986	-0.0360611							0.986	-0.00563486			0.986	0.00984209
0.988	-0.0393189		0.987	-0.0360637							0.987	-0.00577086			0.987	0.00971556
0.989	-0.0392656		0.988	-0.0360825							0.988	-0.0059483			0.988	0.00958307
0.99	-0.0392065		0.989	-0.0360901							0.989	-0.0061235			0.989	0.00947176
0.991	-0.0391813		0.99	-0.0360734							0.99	-0.00625726			0.99	0.00937276
0.992	-0.0392277		0.991	-0.036053							0.991	-0.00635715			0.991	0.00924459
0.993	-0.0393655		0.992	-0.0360557							0.992	-0.00643729			0.992	0.00906367
0.994	-0.0395824		0.993	-0.0360874							0.993	-0.00649203			0.993	0.00884052
0.995	-0.0398381		0.994	-0.0361416							0.994	-0.00652029			0.994	0.00860951
0.996	-0.0401003		0.995	-0.036216							0.995	-0.0065387			0.995	0.00841356
0.997	-0.0403601		0.996	-0.0363186							0.996	-0.00656246			0.996	0.00827451
0.998	-0.0406188		0.997	-0.0364649							0.997	-0.00659145			0.997	0.00817381
0.999	-0.0408797		0.998	-0.0366594							0.998	-0.00662683			0.998	0.00809546
1	-0.0411437		0.999	-0.0368723							0.999	-0.00666798			0.999	0.00805373
1.001	-0.0414064		1	-0.0370481							1	-0.00669959			1	0.00803722
1.002	-0.0416686		1.001	-0.0371502							1.001	-0.00671153			1.001	0.00799649
1.003	-0.0419375		1.002	-0.0371794							1.002	-0.00671307			1.002	0.00790258
1.004	-0.0422152		1.003	-0.0371521							1.003	-0.0067221			1.003	0.00775765
1.005	-0.04249		1.004	-0.0370855							1.004	-0.0067521			1.004	0.00754923
1.006	-0.0427329		1.005	-0.0370113							1.005	-0.00681263			1.005	0.00723907
1.007	-0.0429092		1.006	-0.0369709							1.006	-0.00690315			1.006	0.0068059
1.008	-0.0429858		1.007	-0.0369898							1.007	-0.00700421			1.007	0.00627643
1.009	-0.0429385		1.008	-0.0370758							1.008	-0.00708365			1.008	0.00571095
1.01	-0.0427632		1.009	-0.0372223							1.009	-0.00709319			1.009	0.00517196
1.011	-0.0424713		1.01	-0.0374089							1.01	-0.00698258			1.01	0.0047072
1.012	-0.0420832		1.011	-0.0375975							1.011	-0.00673149			1.011	0.00434694
1.013	-0.0416511		1.012	-0.0377278							1.012	-0.00633785			1.012	0.00410556
1.014	-0.0412619		1.013	-0.0377517							1.013	-0.00580542			1.013	0.00398756
1.015	-0.0409838		1.014	-0.0376743							1.014	-0.00516949			1.014	0.00400568
1.016	-0.0408279		1.015	-0.03753							1.015	-0.00450074			1.015	0.00417264
1.017	-0.0407762		1.016	-0.0373229							1.016	-0.00386164			1.016	0.00447357
1.018	-0.0407954		1.017	-0.0370276							1.017	-0.00325984			1.017	0.0048823
1.019	-0.0408357		1.018	-0.0366426							1.018	-0.00267065			1.018	0.00537756
1.02	-0.0408669		1.019	-0.0361978							1.019	-0.00209323			1.019	0.00593965
1.021	-0.040891		1.02	-0.0357152							1.02	-0.00154895			1.02	0.00655067
1.022	-0.0409071		1.021	-0.0352041							1.021	-0.00105279			1.021	0.00717872
1.023	-0.0409063		1.022	-0.0346748							1.022	-0.000604973			1.022	0.00778991
1.024	-0.0409059		1.023	-0.0341364							1.023	-0.000209644			1.023	0.00837702
1.025	-0.0409513		1.024	-0.0335986							1.024	0.000109192			1.024	0.00893904
1.026	-0.0410728		1.025	-0.033083							1.025	0.000329177			1.025	0.00946516
1.027	-0.0412681		1.026	-0.0326166							1.026	0.000441858			1.026	0.00994873
1.028	-0.0415199		1.027	-0.0322196							1.027	0.000451074			1.027	0.0103756
1.029	-0.0418104		1.028	-0.031935							1.028	0.000366924			1.028	0.0106925
1.03	-0.042136		1.029	-0.0318359							1.029	0.000163298			1.029	0.0107965
1.031	-0.0425206		1.03	-0.0319873							1.03	-0.000238095			1.03	0.0105708
1.032	-0.0430169		1.031	-0.0324391							1.031	-0.000926415			1.031	0.00992899
1.033	-0.0436955		1.032	-0.033235							1.032	-0.00197899			1.032	0.00881782
1.034	-0.0446212		1.033	-0.034406							1.033	-0.00348394			1.033	0.00718905
1.035	-0.0458412		1.034	-0.03598							1.034	-0.00553853			1.034	0.00496892
1.036	-0.0473726		1.035	-0.0379959							1.035	-0.00820067			1.035	0.00206271
1.037	-0.0491704		1.036	-0.0404986							1.036	-0.0114938			1.036	-0.00159919
1.038	-0.0511534		1.037	-0.0435174							1.037	-0.0154515			1.037	-0.00604173
1.039	-0.0532788		1.038	-0.0470557							1.038	-0.0201099			1.038	-0.011277
1.04	-0.055556		1.039	-0.0511006							1.039	-0.0254827			1.039	-0.0173233
1.041	-0.0580152		1.04	-0.0556188							1.04	-0.0315572			1.04	-0.0241925
1.042	-0.0606858		1.041	-0.0605469							1.041	-0.0383067			1.041	-0.0318912
1.043	-0.0635865		1.042	-0.0658126							1.042	-0.0457095			1.042	-0.0404198
1.044	-0.0667066		1.043	-0.0713584							1.043	-0.0537323			1.043	-0.0497377
1.045	-0.0699959		1.044	-0.0771195							1.044	-0.0623139			1.044	-0.0597582
1.046	-0.0733818		1.045	-0.0829992							1.045	-0.0713849			1.045	-0.0703944
1.047	-0.0768137		1.046	-0.0888808							1.046	-0.0808657			1.046	-0.0815478
1.048	-0.0803451		1.047	-0.0946423							1.047	-0.0906451			1.047	-0.093051
1.049	-0.0841671		1.048	-0.100169							1.048	-0.100584			1.048	-0.104686
1.05	-0.0885118		1.049	-0.10535							1.049	-0.110532			1.049	-0.116241
1.051	-0.0935098		1.05	-0.110077							1.05	-0.120338			1.05	-0.127513
1.052	-0.0991291		1.051	-0.114242							1.051	-0.129823			1.051	-0.138285
1.053	-0.105214		1.052	-0.117762							1.052	-0.138775			1.052	-0.148332
1.054	-0.111529		1.053	-0.120577							1.053	-0.146986			1.053	-0.157452
1.055	-0.117795		1.054	-0.122655							1.054	-0.154275			1.054	-0.165451
1.056	-0.123733		1.055	-0.123961							1.055	-0.160485			1.055	-0.172152
1.057	-0.129101		1.056	-0.124443							1.056	-0.165489			1.056	-0.177404
1.058	-0.133696		1.057	-0.124059							1.057	-0.169207			1.057	-0.181081
1.059	-0.137373		1.058	-0.122807							1.058	-0.17159			1.058	-0.183068
1.06	-0.140057		1.059	-0.120713							1.059	-0.172594			1.059	-0.183297
1.061	-0.141693		1.06	-0.117806							1.06	-0.172183			1.06	-0.181776
1.062	-0.142239		1.061	-0.114131							1.061	-0.170327			1.061	-0.178568
1.063	-0.141712		1.062	-0.109744							1.062	-0.167014			1.062	-0.173751
1.064	-0.140183		1.063	-0.104704							1.063	-0.162272			1.063	-0.167398
1.065	-0.137733		1.064	-0.0990849							1.064	-0.15616			1.064	-0.159599
1.066	-0.134457		1.065	-0.0929756							1.065	-0.148759			1.065	-0.150483
1.067	-0.130451		1.066	-0.0864774							1.066	-0.140157			1.066	-0.140194
1.068	-0.125805		1.067	-0.0796857							1.067	-0.130449			1.067	-0.128887
1.069	-0.12061		1.068	-0.07268							1.068	-0.119776			1.068	-0.116762
1.07	-0.114959		1.069	-0.0655467							1.069	-0.108347			1.069	-0.104063
1.071	-0.108933		1.07	-0.0583971							1.07	-0.0963698			1.07	-0.091003
1.072	-0.102592		1.071	-0.0513439							1.071	-0.0840027			1.071	-0.0777173
1.073	-0.0959749		1.072	-0.0444718							1.072	-0.0713753			1.072	-0.0642985
1.074	-0.0891155		1.073	-0.0378349							1.073	-0.0586015			1.073	-0.0508704
1.075	-0.0820637		1.074	-0.0314756							1.074	-0.0458046			1.074	-0.0375969
1.076	-0.0748916		1.075	-0.0254536							1.075	-0.0331284			1.075	-0.0246524
1.077	-0.0676867		1.076	-0.0198417							1.076	-0.0207147			1.076	-0.012197
1.078	-0.0605405		1.077	-0.0146784							1.077	-0.00870525			1.077	-0.000352378
1.079	-0.0535459		1.078	-0.00995907							1.078	0.0027737			1.078	0.0108059
1.08	-0.0467961		1.079	-0.00566703							1.079	0.0136501			1.079	0.0212416
1.081	-0.0403724		1.08	-0.00177197							1.08	0.0238696			1.08	0.0309301
1.082	-0.0343372		1.081	0.00176998							1.081	0.0333511			1.081	0.0398262
1.083	-0.0287315		1.082	0.00498274							1.082	0.0420253			1.082	0.0478857
1.084	-0.0235699		1.083	0.00786016							1.083	0.0498718			1.083	0.0550945
1.085	-0.018848		1.084	0.0103902							1.084	0.056903			1.084	0.0614658
1.086	-0.0145706		1.085	0.0125751							1.085	0.063141			1.085	0.0670133
1.087	-0.0107602		1.086	0.0144311							1.086	0.0686088			1.086	0.0717268
1.088	-0.00742433		1.087	0.0159718							1.087	0.0733267			1.087	0.0756089
1.089	-0.00452317		1.088	0.0172014							1.088	0.0773238			1.088	0.0787152
1.09	-0.00198821		1.089	0.0181228							1.089	0.0806566			1.089	0.0811125
1.091	0.000222107		1.09	0.018752							1.09	0.083409			1.09	0.0828456
1.092	0.00210026		1.091	0.0191268							1.091	0.0856752			1.091	0.0839553
1.093	0.00362418		1.092	0.0192772							1.092	0.0875294			1.092	0.0844952
1.094	0.00479927		1.093	0.019198							1.093	0.0889998			1.093	0.0845386
1.095	0.00566818		1.094	0.0188773							1.094	0.0900723			1.094	0.0841729
1.096	0.00628723		1.095	0.0183365							1.095	0.0907061			1.095	0.0834964
1.097	0.00669306		1.096	0.0176247							1.096	0.0908567			1.096	0.0826138
1.098	0.00690028		1.097	0.0167753							1.097	0.0905048			1.097	0.0815792
1.099	0.00692479		1.098	0.0157969							1.098	0.0896667			1.098	0.0803774
1.1	0.00678971		1.099	0.0147043							1.099	0.0883871			1.099	0.0789907
1.101	0.00651369		1.1	0.0135396							1.1	0.0867239			1.1	0.0774093
1.102	0.00611479		1.101	0.0123617							1.101	0.0847342			1.101	0.0756235
1.103	0.00562365		1.102	0.0112383							1.102	0.0824892			1.102	0.0736733
1.104	0.00506852		1.103	0.0102495							1.103	0.0800612			1.103	0.0716436
1.105	0.00444614		1.104	0.00945398							1.104	0.0775002			1.104	0.0695963
1.106	0.0037364		1.105	0.00886978							1.105	0.074863			1.105	0.0675486
1.107	0.00294838		1.106	0.00848753							1.106	0.0722221			1.106	0.0655004
1.108	0.00213137		1.107	0.00826716							1.107	0.0696396			1.107	0.0634512
1.109	0.00137844		1.108	0.00816081							1.108	0.0671522			1.108	0.0613928
1.11	0.000863684		1.109	0.00815235							1.109	0.0647863			1.109	0.0593352
1.111	0.000862876		1.11	0.00828086							1.11	0.0626581			1.11	0.0574351
1.112	0.00173868		1.111	0.00867472							1.111	0.0611719			1.111	0.056179
1.113	0.00391802		1.112	0.00958167							1.112	0.0611695			1.112	0.0564618
1.114	0.00785028		1.113	0.0113694							1.113	0.0638406			1.113	0.0594612
1.115	0.0139483		1.114	0.0144979							1.114	0.0704335			1.114	0.0663725
1.116	0.0225479		1.115	0.0194444							1.115	0.0819671			1.115	0.0781534
1.117	0.0338799		1.116	0.0266203							1.116	0.0990474			1.116	0.0953531
1.118	0.0480585		1.117	0.0363311							1.117	0.121792			1.117	0.118042
1.119	0.0651106		1.118	0.0487603							1.118	0.14987			1.118	0.145857
1.12	0.0849994		1.119	0.0639871							1.119	0.182604			1.119	0.178109
1.121	0.107617		1.12	0.0820266							1.12	0.219077			1.12	0.213924
1.122	0.132803		1.121	0.102839							1.121	0.258224			1.121	0.252367
1.123	0.160378		1.122	0.126322							1.122	0.298988			1.122	0.29253
1.124	0.19013		1.123	0.152313							1.123	0.340448			1.123	0.333602
1.125	0.221805		1.124	0.180591							1.124	0.381862			1.124	0.374909
1.126	0.255099		1.125	0.210879							1.125	0.422679			1.125	0.415954
1.127	0.289651		1.126	0.242868							1.126	0.46251			1.126	0.45642
1.128	0.325076		1.127	0.276248							1.127	0.501118			1.127	0.496123
1.129	0.361032		1.128	0.31071							1.128	0.538393			1.128	0.534949
1.13	0.397222		1.129	0.345943							1.129	0.574317			1.129	0.572818
1.131	0.433368		1.13	0.381659							1.13	0.608922			1.13	0.609658
1.132	0.469216		1.131	0.4176							1.131	0.642255			1.131	0.64538
1.133	0.504561		1.132	0.453519							1.132	0.674333			1.132	0.679873
1.134	0.539257		1.133	0.489185							1.133	0.705148			1.133	0.713007
1.135	0.573188		1.134	0.524398							1.134	0.734699			1.134	0.744648
1.136	0.606232		1.135	0.558992							1.135	0.762993			1.135	0.774681
1.137	0.638301		1.136	0.592825							1.136	0.789995			1.136	0.80301
1.138	0.669357		1.137	0.625778							1.137	0.815648			1.137	0.829549
1.139	0.699366		1.138	0.657744							1.138	0.839899			1.138	0.854237
1.14	0.728285		1.139	0.68863							1.139	0.862671			1.139	0.87703
1.141	0.756046		1.14	0.718367							1.14	0.883834			1.14	0.89787
1.142	0.782559		1.141	0.746888							1.141	0.903249			1.141	0.916702
1.143	0.807746		1.142	0.77411							1.142	0.920821			1.142	0.933484
1.144	0.831545		1.143	0.799955							1.143	0.9365			1.143	0.94821
1.145	0.853916		1.144	0.824389							1.144	0.950303			1.144	0.960938
1.146	0.874832		1.145	0.847394							1.145	0.962293			1.145	0.971763
1.147	0.894269		1.146	0.868926							1.146	0.972568			1.146	0.980767
1.148	0.91218		1.147	0.888922							1.147	0.981232			1.147	0.988007
1.149	0.928514		1.148	0.907324							1.148	0.988346			1.148	0.993525
1.15	0.943222		1.149	0.92408							1.149	0.993883			1.149	0.997347
1.151	0.956259		1.15	0.939163							1.15	0.997783			1.15	0.999499
1.152	0.967599		1.151	0.952555							1.151	1			1.151	1
1.153	0.977232		1.152	0.964246							1.152	1.00049			1.152	0.998833
1.154	0.985146		1.153	0.974241							1.153	0.999238			1.153	0.99597
1.155	0.991347		1.154	0.982551							1.154	0.996237			1.154	0.991417
1.156	0.995863		1.155	0.989195							1.155	0.991484			1.155	0.985214
1.157	0.998737		1.156	0.994215							1.156	0.984968			1.156	0.977419
1.158	1		1.157	0.997662							1.157	0.976696			1.157	0.968105
1.159	0.999678		1.158	0.999582							1.158	0.966689			1.158	0.957332
1.16	0.99781		1.159	1							1.159	0.954992			1.159	0.945151
1.161	0.994476		1.16	0.998937							1.16	0.941695			1.16	0.931634
1.162	0.98978		1.161	0.996448							1.161	0.926898			1.161	0.91686
1.163	0.983819		1.162	0.992629							1.162	0.91069			1.162	0.900927
1.164	0.976672		1.163	0.987604							1.163	0.893159			1.163	0.883979
1.165	0.968444		1.164	0.981483							1.164	0.874401			1.164	0.866183
1.166	0.959256		1.165	0.974341							1.165	0.854536			1.165	0.847665
1.167	0.9492		1.166	0.966229							1.166	0.833729			1.166	0.828497
1.168	0.93835		1.167	0.957205							1.167	0.812162			1.167	0.808749
1.169	0.926784		1.168	0.947344							1.168	0.789994			1.168	0.788513
1.17	0.91457		1.169	0.936733							1.169	0.767371			1.169	0.767887
1.171	0.901764		1.17	0.925465							1.17	0.744451			1.17	0.746975
1.172	0.888426		1.171	0.913631							1.171	0.721409			1.171	0.725908
1.173	0.874633		1.172	0.901305							1.172	0.698411			1.172	0.704796
1.174	0.860475		1.173	0.888544							1.173	0.67561			1.173	0.683711
1.175	0.846036		1.174	0.875405							1.174	0.653096			1.174	0.662714
1.176	0.831361		1.175	0.861942							1.175	0.630901			1.175	0.641861
1.177	0.816481		1.176	0.848193							1.176	0.609077			1.176	0.621215
1.178	0.801453		1.177	0.834179							1.177	0.587703			1.177	0.600854
1.179	0.78635		1.178	0.819959							1.178	0.566854			1.178	0.580848
1.18	0.771225		1.179	0.805653							1.179	0.546584			1.179	0.561263
1.181	0.756093		1.18	0.791391							1.18	0.526909			1.18	0.542165
1.182	0.740961		1.181	0.77728							1.181	0.5078			1.181	0.523593
1.183	0.725858		1.182	0.763386							1.182	0.489198			1.182	0.505533
1.184	0.710803		1.183	0.749708							1.183	0.471047			1.183	0.487961
1.185	0.6958		1.184	0.736174							1.184	0.4533			1.184	0.470856
1.186	0.680865		1.185	0.722727							1.185	0.435924			1.185	0.454193
1.187	0.666032		1.186	0.709367							1.186	0.418924			1.186	0.43796
1.188	0.651336		1.187	0.696095							1.187	0.402334			1.187	0.422167
1.189	0.636799		1.188	0.68287							1.188	0.386183			1.188	0.40681
1.19	0.622418		1.189	0.669651							1.189	0.370489			1.189	0.391888
1.191	0.608167		1.19	0.656423							1.19	0.355266			1.19	0.377421
1.192	0.594029		1.191	0.643191							1.191	0.34054			1.191	0.363431
1.193	0.580017		1.192	0.629953							1.192	0.326351			1.192	0.349911
1.194	0.566161		1.193	0.616707							1.193	0.312703			1.193	0.336827
1.195	0.552483		1.194	0.603501							1.194	0.299519			1.194	0.324139
1.196	0.539001		1.195	0.590435							1.195	0.286708			1.195	0.311791
1.197	0.525738		1.196	0.57761							1.196	0.274208			1.196	0.29972
1.198	0.512722		1.197	0.565092							1.197	0.261975			1.197	0.287887
1.199	0.499995		1.198	0.552898							1.198	0.249961			1.198	0.276288
1.2	0.487598		1.199	0.541008							1.199	0.238125			1.199	0.264927
1.201	0.47556		1.2	0.529401							1.2	0.226434			1.2	0.253771
1.202	0.463892		1.201	0.518064							1.201	0.214873			1.201	0.242777
1.203	0.452598		1.202	0.506986							1.202	0.203455			1.202	0.231942
1.204	0.441678		1.203	0.496174							1.203	0.192238			1.203	0.2213
1.205	0.431126		1.204	0.485651							1.204	0.181303			1.204	0.2109
1.206	0.420935		1.205	0.475444							1.205	0.170711			1.205	0.200788
1.207	0.4111		1.206	0.465578							1.206	0.160507			1.206	0.191006
1.208	0.401643		1.207	0.45608							1.207	0.150745			1.207	0.181593
1.209	0.392619		1.208	0.446963							1.208	0.141471			1.208	0.172582
1.21	0.384075		1.209	0.438216							1.209	0.132703			1.209	0.163987
1.211	0.376013		1.21	0.429823							1.21	0.124454			1.21	0.155812
1.212	0.368405		1.211	0.421771							1.211	0.116736			1.211	0.148058
1.213	0.361207		1.212	0.414046							1.212	0.10954			1.212	0.14072
1.214	0.354371		1.213	0.406628							1.213	0.102827			1.213	0.133779
1.215	0.347865		1.214	0.399494							1.214	0.0965284			1.214	0.127198
1.216	0.341678		1.215	0.392607							1.215	0.0905749			1.215	0.120938
1.217	0.335794		1.216	0.385947							1.216	0.0849248			1.216	0.114965
1.218	0.330175		1.217	0.379507							1.217	0.0795637			1.217	0.109247
1.219	0.324776		1.218	0.373272							1.218	0.074473			1.218	0.103748
1.22	0.319556		1.219	0.367209							1.219	0.0696132			1.219	0.0984344
1.221	0.314498		1.22	0.361292							1.22	0.0649412			1.22	0.0932798
1.222	0.30962		1.221	0.355517							1.221	0.0604128			1.221	0.0882422
1.223	0.30494		1.222	0.349883							1.222	0.0559743			1.222	0.0832802
1.224	0.300452		1.223	0.344379							1.223	0.0515784			1.223	0.0783854
1.225	0.296123		1.224	0.339004							1.224	0.0472022			1.224	0.0735549
1.226	0.291914		1.225	0.333775							1.225	0.0428347			1.225	0.0687687
1.227	0.287797		1.226	0.328686							1.226	0.0384429			1.226	0.0640123
1.228	0.283765		1.227	0.323709							1.227	0.0339615			1.227	0.0592787
1.229	0.279807		1.228	0.318804							1.228	0.0293432			1.228	0.0545541
1.23	0.275906		1.229	0.313942							1.229	0.024611			1.229	0.049817
1.231	0.272039		1.23	0.30912							1.23	0.0198278			1.23	0.0450412
1.232	0.268182		1.231	0.30436							1.231	0.0150336			1.231	0.0401881
1.233	0.264315		1.232	0.299683							1.232	0.0102378			1.232	0.0352335
1.234	0.260434		1.233	0.295094							1.233	0.00546011			1.233	0.030199
1.235	0.256543		1.234	0.290592							1.234	0.000753358			1.234	0.0251113
1.236	0.252642		1.235	0.286167							1.235	-0.00385176			1.235	0.0199807
1.237	0.248721		1.236	0.281818							1.236	-0.00838833			1.236	0.0148368
1.238	0.244772		1.237	0.27755							1.237	-0.0129064			1.237	0.00970348
1.239	0.240806		1.238	0.27336							1.238	-0.0174287			1.238	0.00456482
1.24	0.236844		1.239	0.269239							1.239	-0.0219596			1.239	-0.000593064
1.241	0.232882		1.24	0.265176							1.24	-0.0265141			1.24	-0.00575813
1.242	0.228906		1.241	0.261156							1.241	-0.0311256			1.241	-0.010918
1.243	0.224917		1.242	0.257168							1.242	-0.0358231			1.242	-0.016076
1.244	0.220918		1.243	0.253211							1.243	-0.0406049			1.243	-0.0212375
1.245	0.216908		1.244	0.249288							1.244	-0.0454357			1.244	-0.0263922
1.246	0.212891		1.245	0.245403							1.245	-0.0502841			1.245	-0.0315333
1.247	0.208894		1.246	0.241555							1.246	-0.0551353			1.246	-0.0366701
1.248	0.204976		1.247	0.237744							1.247	-0.0599542			1.247	-0.0417996
1.249	0.201189		1.248	0.233983							1.248	-0.0646789			1.248	-0.0469052
1.25	0.197543		1.249	0.230304							1.249	-0.0692579			1.249	-0.0519775
1.251	0.194021		1.25	0.226728							1.25	-0.0736786			1.25	-0.0569962
1.252	0.19061		1.251	0.223248							1.251	-0.0779481			1.251	-0.0619216
1.253	0.187306		1.252	0.219844							1.252	-0.0820548			1.252	-0.0667275
1.254	0.184109		1.253	0.216508							1.253	-0.0859846			1.253	-0.0713995
1.255	0.181021		1.254	0.213252							1.254	-0.0897471			1.254	-0.0759167
1.256	0.178045		1.255	0.210101							1.255	-0.0933388			1.255	-0.0802774
1.257	0.175196		1.256	0.207062							1.256	-0.0967209			1.256	-0.084513
1.258	0.172494		1.257	0.20413							1.257	-0.0998781			1.257	-0.0886628
1.259	0.169959		1.258	0.201302							1.258	-0.102859			1.258	-0.0927436
1.26	0.167618		1.259	0.198581							1.259	-0.105736			1.259	-0.0967431
1.261	0.165495		1.26	0.195982							1.26	-0.108567			1.26	-0.100643
1.262	0.163596		1.261	0.19352							1.261	-0.111394			1.261	-0.104421
1.263	0.161914		1.262	0.19118							1.262	-0.11425			1.262	-0.108049
1.264	0.160444		1.263	0.188938							1.263	-0.117155			1.263	-0.111507
1.265	0.159173		1.264	0.186787							1.264	-0.120114			1.264	-0.114777
1.266	0.158083		1.265	0.184725							1.265	-0.123099			1.265	-0.117847
1.267	0.157154		1.266	0.182749							1.266	-0.126056			1.266	-0.120719
1.268	0.156368		1.267	0.180878							1.267	-0.128955			1.267	-0.123414
1.269	0.155706		1.268	0.179134							1.268	-0.131833			1.268	-0.125951
1.27	0.155144		1.269	0.17752							1.269	-0.134726			1.269	-0.128364
1.271	0.154659		1.27	0.176027							1.27	-0.137611			1.27	-0.1307
1.272	0.154226		1.271	0.174634							1.271	-0.140443			1.271	-0.132994
1.273	0.153822		1.272	0.173332							1.272	-0.143198			1.272	-0.135261
1.274	0.153421		1.273	0.172145							1.273	-0.145873			1.273	-0.137526
1.275	0.153006		1.274	0.171104							1.274	-0.148483			1.274	-0.139822
1.276	0.152571		1.275	0.170177							1.275	-0.151053			1.275	-0.142174
1.277	0.152116		1.276	0.169285							1.276	-0.153606			1.276	-0.14462
1.278	0.151626		1.277	0.168373							1.277	-0.156146			1.277	-0.147199
1.279	0.151084		1.278	0.167438							1.278	-0.158652			1.278	-0.149924
1.28	0.150475		1.279	0.166499							1.279	-0.161125			1.279	-0.152786
1.281	0.149768		1.28	0.165569							1.28	-0.163613			1.28	-0.155758
1.282	0.148923		1.281	0.164652							1.281	-0.166168			1.281	-0.158807
1.283	0.147941		1.282	0.163732							1.282	-0.168818			1.282	-0.161904
1.284	0.146888		1.283	0.162785							1.283	-0.171574			1.283	-0.165036
1.285	0.145832		1.284	0.161812							1.284	-0.174431			1.284	-0.168193
1.286	0.144791		1.285	0.160827							1.285	-0.177385			1.285	-0.17136
1.287	0.143729		1.286	0.159826							1.286	-0.18046			1.286	-0.174535
1.288	0.142614		1.287	0.158778							1.287	-0.183692			1.287	-0.177729
1.289	0.141445		1.288	0.157655							1.288	-0.187079			1.288	-0.18098
1.29	0.140239		1.289	0.156467							1.289	-0.190595			1.289	-0.184342
1.291	0.138998		1.29	0.15526							1.29	-0.194208			1.29	-0.187845
1.292	0.137719		1.291	0.154082							1.291	-0.19789			1.291	-0.191481
1.293	0.136425		1.292	0.152953							1.292	-0.201633			1.292	-0.195225
1.294	0.135159		1.293	0.151873							1.293	-0.205439			1.293	-0.199035
1.295	0.133952		1.294	0.150827							1.294	-0.209308			1.294	-0.202859
1.296	0.132805		1.295	0.149785							1.295	-0.213223			1.295	-0.206676
1.297	0.1317		1.296	0.148725							1.296	-0.217159			1.296	-0.21051
1.298	0.130631		1.297	0.147654							1.297	-0.221099			1.297	-0.214391
1.299	0.129604		1.298	0.146596							1.298	-0.22505			1.298	-0.218323
1.3	0.128626		1.299	0.145569							1.299	-0.22904			1.299	-0.2223
1.301	0.12771		1.3	0.14458							1.3	-0.233068			1.3	-0.226299
1.302	0.126906		1.301	0.143636							1.301	-0.237064			1.301	-0.23028
1.303	0.126267		1.302	0.142736							1.302	-0.24094			1.302	-0.234205
1.304	0.125826		1.303	0.141881							1.303	-0.244665			1.303	-0.238068
1.305	0.125618		1.304	0.141095							1.304	-0.248283			1.304	-0.241894
1.306	0.125667		1.305	0.140403							1.305	-0.251851			1.305	-0.245695
1.307	0.125957		1.306	0.139815							1.306	-0.255381			1.306	-0.249473
1.308	0.126455		1.307	0.139324							1.307	-0.258843			1.307	-0.253239
1.309	0.127144		1.308	0.138937							1.308	-0.262218			1.308	-0.25699
1.31	0.128012		1.309	0.138674							1.309	-0.265508			1.309	-0.260697
1.311	0.129035		1.31	0.138539							1.31	-0.268717			1.31	-0.264326
1.312	0.130178		1.311	0.138519							1.311	-0.271863			1.311	-0.267854
1.313	0.13138		1.312	0.13858							1.312	-0.274969			1.312	-0.271271
1.314	0.132574		1.313	0.138664							1.313	-0.278036			1.313	-0.274568
1.315	0.133713		1.314	0.138712							1.314	-0.281067			1.314	-0.277736
1.316	0.134766		1.315	0.138708							1.315	-0.284061			1.315	-0.280781
1.317	0.135716		1.316	0.138667							1.316	-0.286988			1.316	-0.283726
1.318	0.136557		1.317	0.138604							1.317	-0.289817			1.317	-0.28659
1.319	0.137287		1.318	0.138515							1.318	-0.292568			1.318	-0.289372
1.32	0.137909		1.319	0.138389							1.319	-0.295293			1.319	-0.292062
1.321	0.138449		1.32	0.138227							1.32	-0.298044			1.32	-0.294671
1.322	0.138944		1.321	0.138033							1.321	-0.300842			1.321	-0.297246
1.323	0.139416		1.322	0.137808							1.322	-0.303684			1.322	-0.299864
1.324	0.139869		1.323	0.137549							1.323	-0.306592			1.323	-0.302589
1.325	0.140283		1.324	0.137256							1.324	-0.309618			1.324	-0.305441
1.326	0.140616		1.325	0.136945							1.325	-0.312794			1.325	-0.308441
1.327	0.140817		1.326	0.136638							1.326	-0.316109			1.326	-0.311607
1.328	0.140877		1.327	0.136358							1.327	-0.31952			1.327	-0.314921
1.329	0.140808		1.328	0.136128							1.328	-0.322969			1.328	-0.318343
1.33	0.140629		1.329	0.135962							1.329	-0.32642			1.329	-0.321841
1.331	0.140358		1.33	0.135862							1.33	-0.329867			1.33	-0.325388
1.332	0.140016		1.331	0.135816							1.331	-0.333312			1.331	-0.328967
1.333	0.139618		1.332	0.135799							1.332	-0.336764			1.332	-0.332575
1.334	0.139167		1.333	0.135776							1.333	-0.340239			1.333	-0.336207
1.335	0.13866		1.334	0.13572							1.334	-0.343738			1.334	-0.339842
1.336	0.138101		1.335	0.135602							1.335	-0.347257			1.335	-0.343472
1.337	0.137486		1.336	0.135382							1.336	-0.350799			1.336	-0.347114
1.338	0.1368		1.337	0.13503							1.337	-0.35437			1.337	-0.350795
1.339	0.136036		1.338	0.134551							1.338	-0.357982			1.338	-0.354535
1.34	0.135188		1.339	0.133973							1.339	-0.361655			1.339	-0.358358
1.341	0.134235		1.34	0.133313							1.34	-0.365432			1.34	-0.362296
1.342	0.133177		1.341	0.132571							1.341	-0.369357			1.341	-0.366376
1.343	0.132061		1.342	0.131756							1.342	-0.373452			1.342	-0.370612
1.344	0.130936		1.343	0.130882							1.343	-0.377705			1.343	-0.37499
1.345	0.129821		1.344	0.129952							1.344	-0.382079			1.344	-0.379501
1.346	0.128727		1.345	0.128975							1.345	-0.386536			1.345	-0.384126
1.347	0.127692		1.346	0.127956							1.346	-0.391039			1.346	-0.388808
1.348	0.126757		1.347	0.126897							1.347	-0.39555			1.347	-0.393507
1.349	0.125943		1.348	0.125826							1.348	-0.400014			1.348	-0.398221
1.35	0.12525		1.349	0.124782							1.349	-0.404367			1.349	-0.402948
1.351	0.124664		1.35	0.12378							1.35	-0.408554			1.35	-0.407666
1.352	0.124155		1.351	0.12282							1.351	-0.412544			1.351	-0.41234
1.353	0.123683		1.352	0.121935							1.352	-0.416328			1.352	-0.416934
1.354	0.123222		1.353	0.121174							1.353	-0.419913			1.353	-0.421431
1.355	0.122767		1.354	0.120568							1.354	-0.423316			1.354	-0.425805
1.356	0.12233		1.355	0.120121							1.355	-0.426555			1.355	-0.429994
1.357	0.121961		1.356	0.119819							1.356	-0.429637			1.356	-0.433934
1.358	0.121728		1.357	0.119642							1.357	-0.432581			1.357	-0.437612
1.359	0.121667		1.358	0.119559							1.358	-0.435447			1.358	-0.441058
1.36	0.121791		1.359	0.119547							1.359	-0.438301			1.359	-0.444294
1.361	0.122109		1.36	0.119601							1.36	-0.441171			1.36	-0.447327
1.362	0.122629		1.361	0.119725							1.361	-0.444068			1.361	-0.450188
1.363	0.123345		1.362	0.119917							1.362	-0.447008			1.362	-0.452917
1.364	0.124243		1.363	0.120196							1.363	-0.449979			1.363	-0.455555
1.365	0.1253		1.364	0.1206							1.364	-0.452933			1.364	-0.458164
1.366	0.126482		1.365	0.121153							1.365	-0.455844			1.365	-0.460792
1.367	0.127723		1.366	0.121854							1.366	-0.45873			1.366	-0.463442
1.368	0.12896		1.367	0.12268							1.367	-0.461613			1.367	-0.4661
1.369	0.130163		1.368	0.123598							1.368	-0.464489			1.368	-0.468766
1.37	0.131327		1.369	0.124567							1.369	-0.467359			1.369	-0.471447
1.371	0.132465		1.37	0.125552							1.37	-0.470253			1.37	-0.474159
1.372	0.1336		1.371	0.126532							1.371	-0.473207			1.371	-0.476926
1.373	0.134729		1.372	0.127492							1.372	-0.47623			1.372	-0.479752
1.374	0.13583		1.373	0.128422							1.373	-0.479309			1.373	-0.482619
1.375	0.136858		1.374	0.129293							1.374	-0.482437			1.374	-0.485515
1.376	0.137762		1.375	0.130067							1.375	-0.485612			1.375	-0.488466
1.377	0.138521		1.376	0.130727							1.376	-0.488817			1.376	-0.491514
1.378	0.139127		1.377	0.131285							1.377	-0.492044			1.377	-0.494658
1.379	0.139576		1.378	0.131768							1.378	-0.495324			1.378	-0.49788
1.38	0.139868		1.379	0.132188							1.379	-0.498717			1.379	-0.50117
1.381	0.14001		1.38	0.132547							1.38	-0.502283			1.38	-0.504521
1.382	0.14		1.381	0.132848							1.381	-0.50606			1.381	-0.507933
1.383	0.139836		1.382	0.133077							1.382	-0.510071			1.382	-0.511435
1.384	0.139524		1.383	0.13322							1.383	-0.514312			1.383	-0.515062
1.385	0.139086		1.384	0.133269							1.384	-0.518754			1.384	-0.518832
1.386	0.138551		1.385	0.133213							1.385	-0.523341			1.385	-0.522741
1.387	0.137933		1.386	0.133036							1.386	-0.528004			1.386	-0.526769
1.388	0.13724		1.387	0.132743							1.387	-0.5327			1.387	-0.530897
1.389	0.136505		1.388	0.132354							1.388	-0.53742			1.388	-0.535114
1.39	0.135762		1.389	0.131893							1.389	-0.542151			1.389	-0.539396
1.391	0.135026		1.39	0.131373							1.39	-0.546858			1.39	-0.543725
1.392	0.13431		1.391	0.130802							1.391	-0.551497			1.391	-0.548116
1.393	0.133641		1.392	0.130197							1.392	-0.556059			1.392	-0.55258
1.394	0.133045		1.393	0.129579							1.393	-0.560569			1.393	-0.557098
1.395	0.132527		1.394	0.128977							1.394	-0.565049			1.394	-0.561639
1.396	0.132066		1.395	0.128418							1.395	-0.569498			1.395	-0.566203
1.397	0.131649		1.396	0.127939							1.396	-0.573898			1.396	-0.570773
1.398	0.1313		1.397	0.12758							1.397	-0.578217			1.397	-0.575277
1.399	0.131073		1.398	0.127353							1.398	-0.582431			1.398	-0.579628
1.4	0.131024		1.399	0.127244							1.399	-0.586509			1.399	-0.583796
1.401	0.131192		1.4	0.127232							1.4	-0.59041			1.4	-0.587798
1.402	0.131589		1.401	0.127323							1.401	-0.594111			1.401	-0.591654
1.403	0.132207		1.402	0.127536							1.402	-0.597619			1.402	-0.595364
1.404	0.133028		1.403	0.127892							1.403	-0.600955			1.403	-0.598894
1.405	0.134065		1.404	0.12841							1.404	-0.604117			1.404	-0.602192
1.406	0.135357		1.405	0.129101							1.405	-0.607071			1.405	-0.605232
1.407	0.136919		1.406	0.129965							1.406	-0.609793			1.406	-0.608024
1.408	0.138737		1.407	0.13101							1.407	-0.612278			1.407	-0.610578
1.409	0.140808		1.408	0.132232							1.408	-0.614519			1.408	-0.612906
1.41	0.143115		1.409	0.133627							1.409	-0.616518			1.409	-0.615033
1.411	0.145603		1.41	0.135203							1.41	-0.618294			1.41	-0.61698
1.412	0.148203		1.411	0.136949							1.411	-0.61988			1.411	-0.618764
1.413	0.150872		1.412	0.138813							1.412	-0.621297			1.412	-0.620401
1.414	0.153585		1.413	0.140747							1.413	-0.622531			1.413	-0.621899
1.415	0.156301		1.414	0.142727							1.414	-0.623555			1.414	-0.62328
1.416	0.158968		1.415	0.144732							1.415	-0.624377			1.415	-0.624584
1.417	0.161557		1.416	0.146741							1.416	-0.625047			1.416	-0.625853
1.418	0.164074		1.417	0.148743							1.417	-0.625637			1.417	-0.627115
1.419	0.166532		1.418	0.15073							1.418	-0.626212			1.418	-0.628357
1.42	0.168927		1.419	0.152703							1.419	-0.626806			1.419	-0.629537
1.421	0.171255		1.42	0.154677							1.42	-0.627443			1.42	-0.630647
1.422	0.173526		1.421	0.156636							1.421	-0.628151			1.421	-0.631708
1.423	0.175748		1.422	0.158549							1.422	-0.628972			1.422	-0.632734
1.424	0.177922		1.423	0.160404							1.423	-0.629943			1.423	-0.633746
1.425	0.180042		1.424	0.162194							1.424	-0.631073			1.424	-0.634782
1.426	0.182094		1.425	0.163883							1.425	-0.632355			1.425	-0.635886
1.427	0.184051		1.426	0.165422							1.426	-0.633784			1.426	-0.637108
1.428	0.185894		1.427	0.166793							1.427	-0.635352			1.427	-0.638477
1.429	0.187603		1.428	0.168006							1.428	-0.637045			1.428	-0.639993
1.43	0.189139		1.429	0.169072							1.429	-0.638848			1.429	-0.641644
1.431	0.190464		1.43	0.170007							1.43	-0.640751			1.43	-0.643423
1.432	0.191558		1.431	0.170831							1.431	-0.642737			1.431	-0.645328
1.433	0.192413		1.432	0.17154							1.432	-0.644782			1.432	-0.647363
1.434	0.193025		1.433	0.172127							1.433	-0.646881			1.433	-0.649536
1.435	0.193399		1.434	0.172593							1.434	-0.649066			1.434	-0.651851
1.436	0.193553		1.435	0.172929							1.435	-0.651387			1.435	-0.654306
1.437	0.19351		1.436	0.173123							1.436	-0.653868			1.436	-0.656901
1.438	0.193292		1.437	0.173191							1.437	-0.656485			1.437	-0.659625
1.439	0.192916		1.438	0.173166							1.438	-0.659206			1.438	-0.66247
1.44	0.192409		1.439	0.173077							1.439	-0.662022			1.439	-0.665422
1.441	0.191786		1.44	0.172919							1.44	-0.664958			1.44	-0.66845
1.442	0.191052		1.441	0.172662							1.441	-0.668054			1.441	-0.671512
1.443	0.190211		1.442	0.172294							1.442	-0.671327			1.442	-0.674586
1.444	0.189278		1.443	0.171847							1.443	-0.674742			1.443	-0.677667
1.445	0.188301		1.444	0.171364							1.444	-0.678255			1.444	-0.680734
1.446	0.187339		1.445	0.170892							1.445	-0.681833			1.445	-0.683767
1.447	0.186422		1.446	0.170467							1.446	-0.685439			1.446	-0.686781
1.448	0.185575		1.447	0.170109							1.447	-0.689016			1.447	-0.689804
1.449	0.18486		1.448	0.169823							1.448	-0.692491			1.448	-0.692835
1.45	0.184348		1.449	0.169608							1.449	-0.6958			1.449	-0.695838
1.451	0.184056		1.45	0.169489							1.45	-0.698921			1.45	-0.69875
1.452	0.183953		1.451	0.169509							1.451	-0.701865			1.451	-0.701534
1.453	0.184001		1.452	0.169685							1.452	-0.70464			1.452	-0.704184
1.454	0.184191		1.453	0.169997							1.453	-0.707243			1.453	-0.706682
1.455	0.184545		1.454	0.170429							1.454	-0.709667			1.454	-0.708987
1.456	0.185095		1.455	0.170981							1.455	-0.711882			1.455	-0.711072
1.457	0.185867		1.456	0.171652							1.456	-0.713839			1.456	-0.712925
1.458	0.186893		1.457	0.172431							1.457	-0.715494			1.457	-0.714502
1.459	0.188202		1.458	0.173306							1.458	-0.716822			1.458	-0.715767
1.46	0.189806		1.459	0.174288							1.459	-0.717825			1.459	-0.716738
1.461	0.191707		1.46	0.175403							1.46	-0.718528			1.46	-0.717454
1.462	0.193894		1.461	0.176667							1.461	-0.718964			1.461	-0.717946
1.463	0.196326		1.462	0.178083							1.462	-0.719191			1.462	-0.71825
1.464	0.198939		1.463	0.179655							1.463	-0.719263			1.463	-0.718405
1.465	0.201671		1.464	0.181375							1.464	-0.719205			1.464	-0.718454
1.466	0.204472		1.465	0.183235							1.465	-0.719052			1.465	-0.718477
1.467	0.20729		1.466	0.185219							1.466	-0.718875			1.466	-0.718583
1.468	0.210088		1.467	0.187288							1.467	-0.718754			1.467	-0.718848
1.469	0.212852		1.468	0.189398							1.468	-0.718735			1.468	-0.719289
1.47	0.215562		1.469	0.191517							1.469	-0.718848			1.469	-0.719881
1.471	0.218195		1.47	0.193622							1.47	-0.719096			1.47	-0.720567
1.472	0.220748		1.471	0.195692							1.471	-0.719465			1.471	-0.721282
1.473	0.223225		1.472	0.197705							1.472	-0.71994			1.472	-0.721983
1.474	0.225609		1.473	0.199646							1.473	-0.720479			1.473	-0.722652
1.475	0.227874		1.474	0.2015							1.474	-0.721044			1.474	-0.723272
1.476	0.229989		1.475	0.203241							1.475	-0.721637			1.475	-0.723844
1.477	0.231921		1.476	0.204848							1.476	-0.722276			1.476	-0.724395
1.478	0.233654		1.477	0.206311							1.477	-0.722972			1.477	-0.724977
1.479	0.235187		1.478	0.207615							1.478	-0.723732			1.478	-0.725641
1.48	0.236521		1.479	0.208745							1.479	-0.724558			1.479	-0.726414
1.481	0.237662		1.48	0.209692							1.48	-0.725452			1.48	-0.72731
1.482	0.238616		1.481	0.210447							1.481	-0.726449			1.481	-0.728332
1.483	0.239389		1.482	0.211011							1.482	-0.727598			1.482	-0.729474
1.484	0.240004		1.483	0.211408							1.483	-0.728925			1.483	-0.730721
1.485	0.24051		1.484	0.211672							1.484	-0.730426			1.484	-0.732055
1.486	0.240938		1.485	0.211833							1.485	-0.732102			1.485	-0.733483
1.487	0.241267		1.486	0.211916							1.486	-0.733977			1.486	-0.735051
1.488	0.24146		1.487	0.211948							1.487	-0.736065			1.487	-0.736801
1.489	0.241509		1.488	0.211937							1.488	-0.73833			1.488	-0.738723
1.49	0.241437		1.489	0.211867							1.489	-0.740716			1.489	-0.740775
1.491	0.241269		1.49	0.211724							1.49	-0.743195			1.49	-0.742931
1.492	0.241002		1.491	0.211513							1.491	-0.745743			1.491	-0.745173
1.493	0.240599		1.492	0.211254							1.492	-0.748311			1.492	-0.747458
1.494	0.240051		1.493	0.210951							1.493	-0.75086			1.493	-0.749737
1.495	0.239397		1.494	0.210604							1.494	-0.75338			1.494	-0.751988
1.496	0.238692		1.495	0.210221							1.495	-0.755878			1.495	-0.754185
1.497	0.237978		1.496	0.209826							1.496	-0.758359			1.496	-0.756283
1.498	0.237288		1.497	0.209452							1.497	-0.760806			1.497	-0.758255
1.499	0.236657		1.498	0.209138							1.498	-0.763173			1.498	-0.76009
1.5	0.236124		1.499	0.208917							1.499	-0.765407			1.499	-0.76176
1.501	0.235708		1.5	0.2088							1.5	-0.767457			1.5	-0.763237
1.502	0.235403		1.501	0.208801							1.501	-0.769275			1.501	-0.764519
1.503	0.23521		1.502	0.208943							1.502	-0.770844			1.502	-0.765631
1.504	0.23518		1.503	0.209236							1.503	-0.77217			1.503	-0.766586
1.505	0.235384		1.504	0.209664							1.504	-0.773262			1.504	-0.767385
1.506	0.235877		1.505	0.21021							1.505	-0.774124			1.505	-0.768008
1.507	0.236677		1.506	0.21088							1.506	-0.774757			1.506	-0.76843
1.508	0.237772		1.507	0.211693							1.507	-0.775155			1.507	-0.768648
1.509	0.239137		1.508	0.212638							1.508	-0.775288			1.508	-0.768678
1.51	0.240736		1.509	0.213694							1.509	-0.775131			1.509	-0.768528
1.511	0.242517		1.51	0.214858							1.51	-0.774686			1.51	-0.768206
1.512	0.244454		1.511	0.216136							1.511	-0.773975			1.511	-0.767715
1.513	0.246556		1.512	0.217504							1.512	-0.773036			1.512	-0.76706
1.514	0.248819		1.513	0.218926							1.513	-0.771914			1.513	-0.76627
1.515	0.251204		1.514	0.220366							1.514	-0.770642			1.514	-0.765403
1.516	0.253659		1.515	0.221802							1.515	-0.769245			1.515	-0.764516
1.517	0.256142		1.516	0.223228							1.516	-0.767763			1.516	-0.763631
1.518	0.258614		1.517	0.224651							1.517	-0.766237			1.517	-0.762753
1.519	0.261055		1.518	0.226059							1.518	-0.764687			1.518	-0.76188
1.52	0.263469		1.519	0.227426							1.519	-0.763127			1.519	-0.761004
1.521	0.265872		1.52	0.228744							1.52	-0.761599			1.52	-0.760107
1.522	0.268248		1.521	0.230022							1.521	-0.760169			1.521	-0.759186
1.523	0.270555		1.522	0.231266							1.522	-0.758863			1.522	-0.75824
1.524	0.272757		1.523	0.232473							1.523	-0.75767			1.523	-0.757258
1.525	0.274835		1.524	0.233628							1.524	-0.756587			1.524	-0.756247
1.526	0.276772		1.525	0.234715							1.525	-0.755619			1.525	-0.755253
1.527	0.278544		1.526	0.235731							1.526	-0.754773			1.526	-0.754328
1.528	0.280126		1.527	0.236674							1.527	-0.754049			1.527	-0.753511
1.529	0.281502		1.528	0.237543							1.528	-0.753455			1.528	-0.752839
1.53	0.28267		1.529	0.238344							1.529	-0.753007			1.529	-0.752339
1.531	0.283637		1.53	0.239088							1.53	-0.752717			1.53	-0.752002
1.532	0.28442		1.531	0.239769							1.531	-0.752579			1.531	-0.751817
1.533	0.285022		1.532	0.24035							1.532	-0.752572			1.532	-0.751789
1.534	0.285422		1.533	0.240788							1.533	-0.752694			1.533	-0.751907
1.535	0.285591		1.534	0.241057							1.534	-0.752959			1.534	-0.752129
1.536	0.285523		1.535	0.24115							1.535	-0.753382			1.535	-0.752433
1.537	0.285232		1.536	0.241064							1.536	-0.753983			1.536	-0.752829
1.538	0.284723		1.537	0.240801							1.537	-0.754757			1.537	-0.753307
1.539	0.283992		1.538	0.240381							1.538	-0.755671			1.538	-0.753829
1.54	0.283069		1.539	0.239833							1.539	-0.756689			1.539	-0.754359
1.541	0.281996		1.54	0.239168							1.54	-0.757792			1.54	-0.754887
1.542	0.280791		1.541	0.238385							1.541	-0.758953			1.541	-0.755432
1.543	0.279458		1.542	0.237484							1.542	-0.760128			1.542	-0.75602
1.544	0.278024		1.543	0.2365							1.543	-0.761285			1.543	-0.756668
1.545	0.276528		1.544	0.235478							1.544	-0.762405			1.544	-0.757372
1.546	0.275025		1.545	0.234437							1.545	-0.763462			1.545	-0.758114
1.547	0.273585		1.546	0.233387							1.546	-0.764445			1.546	-0.758875
1.548	0.272253		1.547	0.232361							1.547	-0.765352			1.547	-0.75963
1.549	0.271041		1.548	0.231426							1.548	-0.76616			1.548	-0.760347
1.55	0.269971		1.549	0.230645							1.549	-0.76681			1.549	-0.760986
1.551	0.269096		1.55	0.230057							1.55	-0.767237			1.55	-0.761507
1.552	0.26845		1.551	0.229687							1.551	-0.767406			1.551	-0.761885
1.553	0.268025		1.552	0.229559							1.552	-0.767306			1.552	-0.762101
1.554	0.267779		1.553	0.229676							1.553	-0.766932			1.553	-0.762128
1.555	0.267694		1.554	0.230018							1.554	-0.766294			1.554	-0.761946
1.556	0.267783		1.555	0.230548							1.555	-0.765407			1.555	-0.761522
1.557	0.268068		1.556	0.231214							1.556	-0.764281			1.556	-0.760816
1.558	0.26858		1.557	0.231985							1.557	-0.762926			1.557	-0.759825
1.559	0.269331		1.558	0.232873							1.558	-0.76136			1.558	-0.758575
1.56	0.270311		1.559	0.233895							1.559	-0.759589			1.559	-0.757099
1.561	0.271502		1.56	0.235039							1.56	-0.757614			1.56	-0.755438
1.562	0.272901		1.561	0.236273							1.561	-0.755466			1.561	-0.753633
1.563	0.274496		1.562	0.237581							1.562	-0.753207			1.562	-0.751718
1.564	0.276265		1.563	0.238962							1.563	-0.750899			1.563	-0.749727
1.565	0.278191		1.564	0.240423							1.564	-0.748576			1.564	-0.747667
1.566	0.280257		1.565	0.241972							1.565	-0.746246			1.565	-0.745516
1.567	0.282427		1.566	0.243611							1.566	-0.7439			1.566	-0.743271
1.568	0.284648		1.567	0.245311							1.567	-0.741513			1.567	-0.740958
1.569	0.28687		1.568	0.24701							1.568	-0.739069			1.568	-0.738607
1.57	0.289044		1.569	0.24865							1.569	-0.736586			1.569	-0.736232
1.571	0.291137		1.57	0.250202							1.57	-0.734093			1.57	-0.73384
1.572	0.293134		1.571	0.251658							1.571	-0.731609			1.571	-0.73145
1.573	0.295018		1.572	0.253012							1.572	-0.729159			1.572	-0.729083
1.574	0.296764		1.573	0.254262							1.573	-0.726764			1.573	-0.72675
1.575	0.29835		1.574	0.255407							1.574	-0.724433			1.574	-0.724468
1.576	0.299752		1.575	0.256436							1.575	-0.722198			1.575	-0.722272
1.577	0.30093		1.576	0.257326							1.576	-0.720112			1.576	-0.720203
1.578	0.301855		1.577	0.258046							1.577	-0.718198			1.577	-0.718282
1.579	0.302541		1.578	0.258576							1.578	-0.716428			1.578	-0.716502
1.58	0.303031		1.579	0.258934							1.579	-0.714769			1.579	-0.714856
1.581	0.303381		1.58	0.259168							1.58	-0.71321			1.58	-0.713361
1.582	0.303626		1.581	0.25931							1.581	-0.71174			1.581	-0.712027
1.583	0.303752		1.582	0.259357							1.582	-0.710356			1.582	-0.710843
1.584	0.303712		1.583	0.259309							1.583	-0.709083			1.583	-0.709808
1.585	0.303479		1.584	0.259186							1.584	-0.707941			1.584	-0.708939
1.586	0.303051		1.585	0.259009							1.585	-0.70689			1.585	-0.708236
1.587	0.302449		1.586	0.258782							1.586	-0.705865			1.586	-0.707683
1.588	0.301721		1.587	0.258506							1.587	-0.704853			1.587	-0.707261
1.589	0.300902		1.588	0.258183							1.588	-0.703865			1.588	-0.706961
1.59	0.300001		1.589	0.257816							1.589	-0.702875			1.589	-0.706753
1.591	0.299019		1.59	0.2574							1.59	-0.701839			1.59	-0.706583
1.592	0.297958		1.591	0.256909							1.591	-0.700748			1.591	-0.706403
1.593	0.296823		1.592	0.256312							1.592	-0.699632			1.592	-0.706186
1.594	0.295622		1.593	0.255629							1.593	-0.698519			1.593	-0.705933
1.595	0.29438		1.594	0.254908							1.594	-0.697413			1.594	-0.705654
1.596	0.293123		1.595	0.254182							1.595	-0.696325			1.595	-0.705343
1.597	0.291876		1.596	0.253463							1.596	-0.695275			1.596	-0.704988
1.598	0.290692		1.597	0.252741							1.597	-0.694251			1.597	-0.704585
1.599	0.289625		1.598	0.252012							1.598	-0.693198			1.598	-0.704123
1.6	0.288689		1.599	0.251323							1.599	-0.692056			1.599	-0.703593
1.601	0.287872		1.6	0.250753							1.6	-0.690789			1.6	-0.702995
1.602	0.28719		1.601	0.250335							1.601	-0.689405			1.601	-0.702325
1.603	0.286672		1.602	0.250056							1.602	-0.687948			1.602	-0.701576
1.604	0.286335		1.603	0.249897							1.603	-0.686443			1.603	-0.700736
1.605	0.286193		1.604	0.249872							1.604	-0.684879			1.604	-0.699788
1.606	0.286253		1.605	0.250005							1.605	-0.68322			1.605	-0.698727
1.607	0.286507		1.606	0.250294							1.606	-0.681444			1.606	-0.697547
1.608	0.286947		1.607	0.250713							1.607	-0.679569			1.607	-0.696238
1.609	0.287584		1.608	0.251252							1.608	-0.67763			1.608	-0.694788
1.61	0.288446		1.609	0.251914							1.609	-0.675618			1.609	-0.693183
1.611	0.289539		1.61	0.252684							1.61	-0.673479			1.61	-0.691409
1.612	0.290833		1.611	0.253534							1.611	-0.67117			1.611	-0.689467
1.613	0.29226		1.612	0.254434							1.612	-0.668698			1.612	-0.687373
1.614	0.293745		1.613	0.255365							1.613	-0.666078			1.613	-0.685145
1.615	0.295252		1.614	0.256297							1.614	-0.663307			1.614	-0.682802
1.616	0.296769		1.615	0.257203							1.615	-0.660401			1.615	-0.680332
1.617	0.298283		1.616	0.258079							1.616	-0.657396			1.616	-0.677691
1.618	0.299789		1.617	0.258945							1.617	-0.654355			1.617	-0.674874
1.619	0.301268		1.618	0.259815							1.618	-0.65133			1.618	-0.671953
1.62	0.302671		1.619	0.260673							1.619	-0.648335			1.619	-0.669003
1.621	0.30395		1.62	0.261488							1.62	-0.645374			1.62	-0.66608
1.622	0.305092		1.621	0.262236							1.621	-0.642479			1.621	-0.663235
1.623	0.306099		1.622	0.262906							1.622	-0.63969			1.622	-0.660494
1.624	0.306971		1.623	0.263497							1.623	-0.637017			1.623	-0.657865
1.625	0.307689		1.624	0.264016							1.624	-0.63445			1.624	-0.655348
1.626	0.308227		1.625	0.264476							1.625	-0.631984			1.625	-0.652928
1.627	0.308596		1.626	0.264881							1.626	-0.629612			1.626	-0.650587
1.628	0.308812		1.627	0.265232							1.627	-0.627328			1.627	-0.648326
1.629	0.308864		1.628	0.265533							1.628	-0.625129			1.628	-0.646157
1.63	0.308742		1.629	0.26577							1.629	-0.623016			1.629	-0.64408
1.631	0.308462		1.63	0.265906							1.63	-0.620998			1.63	-0.642084
1.632	0.308069		1.631	0.265904							1.631	-0.619097			1.631	-0.640184
1.633	0.307619		1.632	0.265762							1.632	-0.617341			1.632	-0.638405
1.634	0.307137		1.633	0.265505							1.633	-0.61576			1.633	-0.636753
1.635	0.306585		1.634	0.265151							1.634	-0.614387			1.634	-0.635228
1.636	0.305907		1.635	0.264691							1.635	-0.613252			1.635	-0.633857
1.637	0.305091		1.636	0.264091							1.636	-0.61236			1.636	-0.63268
1.638	0.304173		1.637	0.263336							1.637	-0.61169			1.637	-0.631699
1.639	0.303187		1.638	0.262436							1.638	-0.611208			1.638	-0.630869
1.64	0.302122		1.639	0.261411							1.639	-0.610891			1.639	-0.630131
1.641	0.300948		1.64	0.260261							1.64	-0.610726			1.64	-0.629448
1.642	0.299651		1.641	0.258972							1.641	-0.610699			1.641	-0.628818
1.643	0.298238		1.642	0.257546							1.642	-0.61079			1.642	-0.628247
1.644	0.296727		1.643	0.256008							1.643	-0.610976			1.643	-0.627734
1.645	0.295143		1.644	0.254379							1.644	-0.611226			1.644	-0.627276
1.646	0.293515		1.645	0.25269							1.645	-0.611495			1.645	-0.626889
1.647	0.29187		1.646	0.250985							1.646	-0.611726			1.646	-0.626576
1.648	0.29023		1.647	0.249319							1.647	-0.611891			1.647	-0.626311
1.649	0.288629		1.648	0.247748							1.648	-0.611978			1.648	-0.626083
1.65	0.287131		1.649	0.246319							1.649	-0.611962			1.649	-0.62589
1.651	0.285789		1.65	0.245058							1.65	-0.611813			1.65	-0.625716
1.652	0.284631		1.651	0.243975							1.651	-0.611527			1.651	-0.625519
1.653	0.283693		1.652	0.243072							1.652	-0.61111			1.652	-0.625252
1.654	0.283011		1.653	0.242359							1.653	-0.610548			1.653	-0.624874
1.655	0.282591		1.654	0.241859							1.654	-0.609817			1.654	-0.62432
1.656	0.282411		1.655	0.241592							1.655	-0.608911			1.655	-0.623527
1.657	0.28246		1.656	0.241562							1.656	-0.607856			1.656	-0.622472
1.658	0.282737		1.657	0.241762							1.657	-0.606645			1.657	-0.621149
1.659	0.283227		1.658	0.242191							1.658	-0.605255			1.658	-0.619551
1.66	0.283905		1.659	0.242849							1.659	-0.603723			1.659	-0.617686
1.661	0.284747		1.66	0.243707							1.66	-0.602118			1.66	-0.615582
1.662	0.285731		1.661	0.24471							1.661	-0.600471			1.661	-0.613269
1.663	0.286819		1.662	0.245811							1.662	-0.598781			1.662	-0.610787
1.664	0.28799		1.663	0.246986							1.663	-0.59707			1.663	-0.608201
1.665	0.289245		1.664	0.248223							1.664	-0.595372			1.664	-0.605586
1.666	0.290584		1.665	0.249516							1.665	-0.5937			1.665	-0.602977
1.667	0.291978		1.666	0.250868							1.666	-0.592048			1.666	-0.600397
1.668	0.293378		1.667	0.252257							1.667	-0.59041			1.667	-0.597876
1.669	0.294742		1.668	0.253637							1.668	-0.588779			1.668	-0.595429
1.67	0.296041		1.669	0.254991							1.669	-0.58714			1.669	-0.593036
1.671	0.297259		1.67	0.256322							1.67	-0.585475			1.67	-0.590675
1.672	0.298362		1.671	0.257608							1.671	-0.583763			1.671	-0.588382
1.673	0.299324		1.672	0.258802							1.672	-0.581995			1.672	-0.586226
1.674	0.30015		1.673	0.259863							1.673	-0.580175			1.673	-0.584238
1.675	0.300844		1.674	0.260775							1.674	-0.578306			1.674	-0.582419
1.676	0.301377		1.675	0.261545							1.675	-0.576379			1.675	-0.580753
1.677	0.301712		1.676	0.262182							1.676	-0.574406			1.676	-0.579199
1.678	0.301836		1.677	0.262687							1.677	-0.572429			1.677	-0.577721
1.679	0.301754		1.678	0.263052							1.678	-0.570514			1.678	-0.576331
1.68	0.301464		1.679	0.263274							1.679	-0.568721			1.679	-0.575067
1.681	0.300963		1.68	0.263376							1.68	-0.567087			1.68	-0.573947
1.682	0.300269		1.681	0.263401							1.681	-0.565631			1.681	-0.572973
1.683	0.299407		1.682	0.26338							1.682	-0.564365			1.682	-0.57213
1.684	0.298395		1.683	0.263315							1.683	-0.563299			1.683	-0.571383
1.685	0.297268		1.684	0.263195							1.684	-0.562428			1.684	-0.570699
1.686	0.296075		1.685	0.263023							1.685	-0.561743			1.685	-0.570074
1.687	0.294847		1.686	0.262816							1.686	-0.561243			1.686	-0.569506
1.688	0.293577		1.687	0.262586							1.687	-0.56091			1.687	-0.568979
1.689	0.292255		1.688	0.262323							1.688	-0.560684			1.688	-0.568459
1.69	0.290875		1.689	0.262016							1.689	-0.560517			1.689	-0.567918
1.691	0.289435		1.69	0.261657							1.69	-0.560392			1.69	-0.567343
1.692	0.287958		1.691	0.261232							1.691	-0.560298			1.691	-0.566734
1.693	0.286484		1.692	0.260718							1.692	-0.560223			1.692	-0.56607
1.694	0.285057		1.693	0.260106							1.693	-0.560143			1.693	-0.565301
1.695	0.283699		1.694	0.259405							1.694	-0.56001			1.694	-0.564386
1.696	0.282403		1.695	0.25864							1.695	-0.559793			1.695	-0.563335
1.697	0.281155		1.696	0.257834							1.696	-0.5595			1.696	-0.562187
1.698	0.279953		1.697	0.256997							1.697	-0.559146			1.697	-0.560982
1.699	0.27879		1.698	0.256148							1.698	-0.558711			1.698	-0.559732
1.7	0.277669		1.699	0.255301							1.699	-0.558147			1.699	-0.558441
1.701	0.276611		1.7	0.254476							1.7	-0.557427			1.7	-0.557116
1.702	0.275646		1.701	0.253699							1.701	-0.556568			1.701	-0.55575
1.703	0.274806		1.702	0.252994							1.702	-0.555585			1.702	-0.554297
1.704	0.27412		1.703	0.2524							1.703	-0.554462			1.703	-0.552701
1.705	0.273609		1.704	0.251951							1.704	-0.553182			1.704	-0.55093
1.706	0.273286		1.705	0.251655							1.705	-0.551748			1.705	-0.54898
1.707	0.273149		1.706	0.251502							1.706	-0.55017			1.706	-0.54685
1.708	0.273194		1.707	0.251482							1.707	-0.548444			1.707	-0.544562
1.709	0.273411		1.708	0.25158							1.708	-0.546563			1.708	-0.542166
1.71	0.273773		1.709	0.25178							1.709	-0.544535			1.709	-0.539727
1.711	0.274242		1.71	0.252062							1.71	-0.54237			1.71	-0.53727
1.712	0.274794		1.711	0.252376							1.711	-0.540058			1.711	-0.534778
1.713	0.275431		1.712	0.25268							1.712	-0.537568			1.712	-0.532235
1.714	0.27617		1.713	0.252967							1.713	-0.534882			1.713	-0.529632
1.715	0.277005		1.714	0.253253							1.714	-0.532034			1.714	-0.526956
1.716	0.277898		1.715	0.253551							1.715	-0.529093			1.715	-0.52421
1.717	0.278799		1.716	0.253845							1.716	-0.526122			1.716	-0.521418
1.718	0.279664		1.717	0.25411							1.717	-0.523181			1.717	-0.518619
1.719	0.280458		1.718	0.254321							1.718	-0.520315			1.718	-0.515862
1.72	0.281169		1.719	0.254464							1.719	-0.51754			1.719	-0.513195
1.721	0.281805		1.72	0.254531							1.72	-0.51483			1.72	-0.510644
1.722	0.282372		1.721	0.254509							1.721	-0.512154			1.721	-0.508201
1.723	0.28288		1.722	0.254382							1.722	-0.509528			1.722	-0.505854
1.724	0.283342		1.723	0.254155							1.723	-0.507005			1.723	-0.503622
1.725	0.283758		1.724	0.253853							1.724	-0.504623			1.724	-0.501546
1.726	0.284124		1.725	0.253505							1.725	-0.502382			1.725	-0.499646
1.727	0.284433		1.726	0.253118							1.726	-0.500284			1.726	-0.497921
1.728	0.284658		1.727	0.252674							1.727	-0.498334			1.727	-0.496367
1.729	0.284751		1.728	0.252152							1.728	-0.496513			1.728	-0.494955
1.73	0.284658		1.729	0.251548							1.729	-0.494791			1.729	-0.493651
1.731	0.284348		1.73	0.250856							1.73	-0.493155			1.73	-0.492449
1.732	0.283825		1.731	0.25006							1.731	-0.491592			1.731	-0.491361
1.733	0.28312		1.732	0.249153							1.732	-0.490103			1.732	-0.490375
1.734	0.282265		1.733	0.248136							1.733	-0.4887			1.733	-0.489455
1.735	0.28126		1.734	0.247007							1.734	-0.487409			1.734	-0.488581
1.736	0.280072		1.735	0.245778							1.735	-0.486266			1.735	-0.487763
1.737	0.278681		1.736	0.244471							1.736	-0.485298			1.736	-0.487004
1.738	0.277095		1.737	0.243107							1.737	-0.484498			1.737	-0.486296
1.739	0.275356		1.738	0.241711							1.738	-0.483841			1.738	-0.485639
1.74	0.273506		1.739	0.240305							1.739	-0.483298			1.739	-0.485045
1.741	0.271572		1.74	0.23889							1.74	-0.482843			1.74	-0.484511
1.742	0.26956		1.741	0.237448							1.741	-0.482481			1.741	-0.484032
1.743	0.267473		1.742	0.235956							1.742	-0.482233			1.742	-0.483598
1.744	0.265328		1.743	0.234404							1.743	-0.482096			1.743	-0.483185
1.745	0.263192		1.744	0.232816							1.744	-0.482044			1.744	-0.482782
1.746	0.261163		1.745	0.231241							1.745	-0.482036			1.745	-0.482394
1.747	0.259315		1.746	0.229728							1.746	-0.482022			1.746	-0.482006
1.748	0.257673		1.747	0.228307							1.747	-0.481944			1.747	-0.481593
1.749	0.256237		1.748	0.226995							1.748	-0.48176			1.748	-0.481144
1.75	0.255006		1.749	0.225816							1.749	-0.481446			1.749	-0.480647
1.751	0.253999		1.75	0.224807							1.75	-0.480993			1.75	-0.480083
1.752	0.253241		1.751	0.223999							1.751	-0.480395			1.751	-0.479443
1.753	0.25275		1.752	0.223408							1.752	-0.479645			1.752	-0.478731
1.754	0.252524		1.753	0.223042							1.753	-0.478743			1.753	-0.47791
1.755	0.252544		1.754	0.222907							1.754	-0.477699			1.754	-0.476916
1.756	0.252775		1.755	0.222997							1.755	-0.476526			1.755	-0.475694
1.757	0.25318		1.756	0.22328							1.756	-0.475221			1.756	-0.474211
1.758	0.253743		1.757	0.223712							1.757	-0.473774			1.757	-0.472466
1.759	0.254467		1.758	0.224259							1.758	-0.472187			1.758	-0.470503
1.76	0.255341		1.759	0.224881							1.759	-0.470455			1.759	-0.46836
1.761	0.256357		1.76	0.225546							1.76	-0.468565			1.76	-0.466055
1.762	0.257491		1.761	0.226251							1.761	-0.46653			1.761	-0.46362
1.763	0.258686		1.762	0.227006							1.762	-0.464381			1.762	-0.4611
1.764	0.259892		1.763	0.227806							1.763	-0.462143			1.763	-0.458525
1.765	0.26109		1.764	0.22864							1.764	-0.459848			1.764	-0.455929
1.766	0.262281		1.765	0.22951							1.765	-0.45753			1.765	-0.453345
1.767	0.263457		1.766	0.230415							1.766	-0.455207			1.766	-0.450794
1.768	0.264601		1.767	0.231354							1.767	-0.452881			1.767	-0.448307
1.769	0.265695		1.768	0.232316							1.768	-0.450561			1.768	-0.44594
1.77	0.266727		1.769	0.233287							1.769	-0.448256			1.769	-0.443719
1.771	0.267673		1.77	0.234262							1.77	-0.445966			1.77	-0.44164
1.772	0.268497		1.771	0.235224							1.771	-0.443697			1.771	-0.439717
1.773	0.269161		1.772	0.236141							1.772	-0.441479			1.772	-0.43798
1.774	0.269651		1.773	0.236975							1.773	-0.439357			1.773	-0.436443
1.775	0.269957		1.774	0.237668							1.774	-0.437362			1.774	-0.435085
1.776	0.27006		1.775	0.238148							1.775	-0.435512			1.775	-0.433895
1.777	0.269924		1.776	0.238373							1.776	-0.433825			1.776	-0.432882
1.778	0.269525		1.777	0.238333							1.777	-0.432329			1.777	-0.432063
1.779	0.26886		1.778	0.238027							1.778	-0.431055			1.778	-0.431428
1.78	0.267927		1.779	0.237453							1.779	-0.430046			1.779	-0.430933
1.781	0.266716		1.78	0.236606							1.78	-0.429359			1.78	-0.430544
1.782	0.265234		1.781	0.235479							1.781	-0.429016			1.781	-0.430266
1.783	0.263491		1.782	0.234084							1.782	-0.429002			1.782	-0.430131
1.784	0.261497		1.783	0.232443							1.783	-0.429311			1.783	-0.430173
1.785	0.259276		1.784	0.230587							1.784	-0.429936			1.784	-0.430392
1.786	0.256854		1.785	0.228548							1.785	-0.430825			1.785	-0.430751
1.787	0.254242		1.786	0.226365							1.786	-0.431889			1.786	-0.431238
1.788	0.251481		1.787	0.224076							1.787	-0.433025			1.787	-0.431848
1.789	0.248643		1.788	0.221726							1.788	-0.434138			1.788	-0.432559
1.79	0.245801		1.789	0.219368							1.789	-0.435147			1.789	-0.433341
1.791	0.243		1.79	0.21704							1.79	-0.436008			1.79	-0.434151
1.792	0.24025		1.791	0.214748							1.791	-0.436702			1.791	-0.434946
1.793	0.237555		1.792	0.212475							1.792	-0.437211			1.792	-0.435712
1.794	0.234928		1.793	0.21021							1.793	-0.437515			1.793	-0.436442
1.795	0.232398		1.794	0.207987							1.794	-0.437592			1.794	-0.437096
1.796	0.229991		1.795	0.205885							1.795	-0.437434			1.795	-0.437599
1.797	0.227738		1.796	0.203981							1.796	-0.43703			1.796	-0.437874
1.798	0.225683		1.797	0.202326							1.797	-0.43637			1.797	-0.437894
1.799	0.223878		1.798	0.20095							1.798	-0.435451			1.798	-0.437672
1.8	0.222384		1.799	0.199878							1.799	-0.43427			1.799	-0.437215
1.801	0.221253		1.8	0.199126							1.8	-0.432838			1.8	-0.436482
1.802	0.220515		1.801	0.198695							1.801	-0.431181			1.801	-0.43541
1.803	0.220181		1.802	0.198575							1.802	-0.42932			1.802	-0.433968
1.804	0.220242		1.803	0.198752							1.803	-0.427262			1.803	-0.432174
1.805	0.220686		1.804	0.199199							1.804	-0.425012			1.804	-0.43005
1.806	0.221499		1.805	0.199903							1.805	-0.422585			1.805	-0.427614
1.807	0.222658		1.806	0.20085							1.806	-0.419985			1.806	-0.424887
1.808	0.224136		1.807	0.202014							1.807	-0.417221			1.807	-0.421921
1.809	0.225895		1.808	0.203348							1.808	-0.414302			1.808	-0.418788
1.81	0.227908		1.809	0.204814							1.809	-0.411205			1.809	-0.415563
1.811	0.230161		1.81	0.206382							1.81	-0.407901			1.81	-0.412293
1.812	0.232634		1.811	0.20803							1.811	-0.404388			1.811	-0.408991
1.813	0.235287		1.812	0.209731							1.812	-0.40069			1.812	-0.405667
1.814	0.238073		1.813	0.211459							1.813	-0.396832			1.813	-0.402344
1.815	0.240936		1.814	0.213196							1.814	-0.392842			1.814	-0.399029
1.816	0.243812		1.815	0.214936							1.815	-0.388758			1.815	-0.395706
1.817	0.246637		1.816	0.216678							1.816	-0.384625			1.816	-0.392391
1.818	0.249348		1.817	0.218414							1.817	-0.380499			1.817	-0.389144
1.819	0.251905		1.818	0.220125							1.818	-0.376439			1.818	-0.386007
1.82	0.254268		1.819	0.221791							1.819	-0.372513			1.819	-0.382988
1.821	0.256373		1.82	0.22339							1.82	-0.3688			1.82	-0.380086
1.822	0.258172		1.821	0.22489							1.821	-0.365369			1.821	-0.377318
1.823	0.259669		1.822	0.226258							1.822	-0.36227			1.822	-0.374746
1.824	0.260898		1.823	0.227478							1.823	-0.359531			1.823	-0.372449
1.825	0.261903		1.824	0.228538							1.824	-0.357152			1.824	-0.370451
1.826	0.262713		1.825	0.229425							1.825	-0.3551			1.825	-0.368712
1.827	0.263321		1.826	0.230136							1.826	-0.353329			1.826	-0.367187
1.828	0.263698		1.827	0.23067							1.827	-0.351829			1.827	-0.365859
1.829	0.263842		1.828	0.231025							1.828	-0.350646			1.828	-0.364725
1.83	0.263767		1.829	0.231187							1.829	-0.349814			1.829	-0.363784
1.831	0.263474		1.83	0.231145							1.83	-0.349314			1.83	-0.363045
1.832	0.262966		1.831	0.230897							1.831	-0.3491			1.831	-0.362512
1.833	0.262249		1.832	0.230437							1.832	-0.349126			1.832	-0.362171
1.834	0.261318		1.833	0.229754							1.833	-0.349353			1.833	-0.361995
1.835	0.260155		1.834	0.228851							1.834	-0.34977			1.834	-0.361958
1.836	0.258731		1.835	0.22773							1.835	-0.350362			1.835	-0.362056
1.837	0.257025		1.836	0.226395							1.836	-0.351093			1.836	-0.362323
1.838	0.255032		1.837	0.224869							1.837	-0.351922			1.837	-0.362794
1.839	0.252769		1.838	0.223191							1.838	-0.352821			1.838	-0.363461
1.84	0.250283		1.839	0.221384							1.839	-0.353781			1.839	-0.364286
1.841	0.247633		1.84	0.219456							1.84	-0.354808			1.84	-0.365239
1.842	0.244887		1.841	0.217427							1.841	-0.355902			1.841	-0.366309
1.843	0.242121		1.842	0.215354							1.842	-0.357061			1.842	-0.367449
1.844	0.239407		1.843	0.213296							1.843	-0.358273			1.843	-0.368568
1.845	0.236802		1.844	0.2113							1.844	-0.359499			1.844	-0.369587
1.846	0.234356		1.845	0.209406							1.845	-0.360694			1.845	-0.370474
1.847	0.23212		1.846	0.207645							1.846	-0.361801			1.846	-0.371209
1.848	0.230155		1.847	0.206041							1.847	-0.362743			1.847	-0.371766
1.849	0.228498		1.848	0.204642							1.848	-0.363449			1.848	-0.372109
1.85	0.227153		1.849	0.203489							1.849	-0.363863			1.849	-0.372198
1.851	0.226129		1.85	0.202599							1.85	-0.363948			1.85	-0.372007
1.852	0.22544		1.851	0.201999							1.851	-0.363685			1.851	-0.371567
1.853	0.225084		1.852	0.201739							1.852	-0.363078			1.852	-0.370945
1.854	0.225076		1.853	0.201849							1.853	-0.362147			1.853	-0.370163
1.855	0.225448		1.854	0.202314							1.854	-0.360935			1.854	-0.369182
1.856	0.226193		1.855	0.203095							1.855	-0.359494			1.855	-0.367968
1.857	0.22726		1.856	0.204144							1.856	-0.357856			1.856	-0.366526
1.858	0.228582		1.857	0.205403							1.857	-0.356038			1.857	-0.36488
1.859	0.230097		1.858	0.206816							1.858	-0.354072			1.858	-0.363035
1.86	0.231749		1.859	0.20833							1.859	-0.351989			1.859	-0.360987
1.861	0.233488		1.86	0.209899							1.86	-0.349786			1.86	-0.358739
1.862	0.235289		1.861	0.211472							1.861	-0.347454			1.861	-0.356307
1.863	0.237151		1.862	0.213012							1.862	-0.345002			1.862	-0.353724
1.864	0.239071		1.863	0.214503							1.863	-0.34244			1.863	-0.351027
1.865	0.241016		1.864	0.215941							1.864	-0.33978			1.864	-0.348235
1.866	0.24292		1.865	0.217334							1.865	-0.337056			1.865	-0.345353
1.867	0.244727		1.866	0.21869							1.866	-0.334321			1.866	-0.342375
1.868	0.246418		1.867	0.220011							1.867	-0.3316			1.867	-0.339308
1.869	0.248003		1.868	0.221284							1.868	-0.328867			1.868	-0.336194
1.87	0.2495		1.869	0.222481							1.869	-0.326093			1.869	-0.333092
1.871	0.250907		1.87	0.22356							1.87	-0.323296			1.87	-0.330041
1.872	0.252199		1.871	0.224476							1.871	-0.320515			1.871	-0.327068
1.873	0.253354		1.872	0.225206							1.872	-0.317769			1.872	-0.324196
1.874	0.25437		1.873	0.225761							1.873	-0.315074			1.873	-0.321443
1.875	0.255257		1.874	0.226158							1.874	-0.312459			1.874	-0.318815
1.876	0.256018		1.875	0.226383							1.875	-0.309972			1.875	-0.316323
1.877	0.25663		1.876	0.226414							1.876	-0.307694			1.876	-0.314005
1.878	0.257043		1.877	0.226241							1.877	-0.305688			1.877	-0.311904
1.879	0.257205		1.878	0.225852							1.878	-0.303965			1.878	-0.31005
1.88	0.257087		1.879	0.225246							1.879	-0.302515			1.879	-0.308483
1.881	0.256676		1.88	0.224443							1.88	-0.301349			1.88	-0.307249
1.882	0.255978		1.881	0.223469							1.881	-0.300481			1.881	-0.306365
1.883	0.254987		1.882	0.222347							1.882	-0.299929			1.882	-0.305822
1.884	0.253679		1.883	0.221082							1.883	-0.299733			1.883	-0.305611
1.885	0.252044		1.884	0.21967							1.884	-0.299926			1.884	-0.305722
1.886	0.250117		1.885	0.218102							1.885	-0.300498			1.885	-0.306108
1.887	0.247956		1.886	0.216365							1.886	-0.301391			1.886	-0.306703
1.888	0.245629		1.887	0.214459							1.887	-0.30253			1.887	-0.307453
1.889	0.243192		1.888	0.212422							1.888	-0.303835			1.888	-0.308317
1.89	0.240698		1.889	0.210318							1.889	-0.305243			1.889	-0.309249
1.891	0.238192		1.89	0.208216							1.89	-0.306717			1.89	-0.310216
1.892	0.235706		1.891	0.206175							1.891	-0.308231			1.891	-0.31119
1.893	0.233264		1.892	0.204248							1.892	-0.309747			1.892	-0.312149
1.894	0.230877		1.893	0.20247							1.893	-0.311195			1.893	-0.31307
1.895	0.228573		1.894	0.200849							1.894	-0.312495			1.894	-0.313921
1.896	0.226415		1.895	0.199393							1.895	-0.313599			1.895	-0.314677
1.897	0.224469		1.896	0.198137							1.896	-0.314512			1.896	-0.31531
1.898	0.222776		1.897	0.197128							1.897	-0.31525			1.897	-0.31576
1.899	0.221344		1.898	0.196387							1.898	-0.315789			1.898	-0.315965
1.9	0.220183		1.899	0.195893							1.899	-0.316058			1.899	-0.315918
1.901	0.219314		1.9	0.195604							1.9	-0.316016			1.9	-0.315645
1.902	0.218754		1.901	0.19549							1.901	-0.315663			1.901	-0.315152
1.903	0.218525		1.902	0.195546							1.902	-0.315003			1.902	-0.314404
1.904	0.218632		1.903	0.195788							1.903	-0.314027			1.903	-0.31336
1.905	0.219044		1.904	0.196252							1.904	-0.312751			1.904	-0.312029
1.906	0.219708		1.905	0.196937							1.905	-0.311218			1.905	-0.310448
1.907	0.220599		1.906	0.197787							1.906	-0.30945			1.906	-0.30864
1.908	0.221704		1.907	0.198741							1.907	-0.307448			1.907	-0.306611
1.909	0.222993		1.908	0.199764							1.908	-0.305219			1.908	-0.304369
1.91	0.224451		1.909	0.200831							1.909	-0.302772			1.909	-0.301939
1.911	0.226069		1.91	0.201939							1.91	-0.300108			1.91	-0.29937
1.912	0.227807		1.911	0.203084							1.911	-0.297266			1.911	-0.296721
1.913	0.22962		1.912	0.204244							1.912	-0.294317			1.912	-0.294036
1.914	0.231494		1.913	0.205378							1.913	-0.291295			1.913	-0.291319
1.915	0.233401		1.914	0.206457							1.914	-0.288178			1.914	-0.288552
1.916	0.23527		1.915	0.207458							1.915	-0.28495			1.915	-0.28575
1.917	0.23702		1.916	0.208372							1.916	-0.281626			1.916	-0.282965
1.918	0.238595		1.917	0.209197							1.917	-0.278225			1.917	-0.28024
1.919	0.239965		1.918	0.209943							1.918	-0.274768			1.918	-0.277581
1.92	0.241125		1.919	0.210623							1.919	-0.271304			1.919	-0.274962
1.921	0.242072		1.92	0.211241							1.92	-0.267923			1.92	-0.272367
1.922	0.242792		1.921	0.211778							1.921	-0.264724			1.921	-0.269829
1.923	0.243267		1.922	0.21221							1.922	-0.261786			1.922	-0.267416
1.924	0.243497		1.923	0.212542							1.923	-0.259134			1.923	-0.265171
1.925	0.243494		1.924	0.212793							1.924	-0.256746			1.924	-0.263096
1.926	0.243267		1.925	0.21295							1.925	-0.254593			1.925	-0.261188
1.927	0.24281		1.926	0.21297							1.926	-0.252685			1.926	-0.259463
1.928	0.24213		1.927	0.212819							1.927	-0.251067			1.927	-0.257955
1.929	0.241245		1.928	0.212491							1.928	-0.249766			1.928	-0.256682
1.93	0.24018		1.929	0.211992							1.929	-0.248759			1.929	-0.255645
1.931	0.238939		1.93	0.21132							1.93	-0.248008			1.93	-0.254831
1.932	0.237506		1.931	0.210457							1.931	-0.247482			1.931	-0.254232
1.933	0.235867		1.932	0.209384							1.932	-0.247183			1.932	-0.25384
1.934	0.234021		1.933	0.208093							1.933	-0.247152			1.933	-0.253636
1.935	0.231971		1.934	0.206577							1.934	-0.247425			1.934	-0.253606
1.936	0.229718		1.935	0.204854							1.935	-0.247981			1.935	-0.253757
1.937	0.227268		1.936	0.202965							1.936	-0.24877			1.936	-0.25409
1.938	0.224641		1.937	0.200937							1.937	-0.249745			1.937	-0.254573
1.939	0.221859		1.938	0.198769							1.938	-0.25087			1.938	-0.255169
1.94	0.218949		1.939	0.19646							1.939	-0.252118			1.939	-0.255844
1.941	0.215959		1.94	0.194049							1.94	-0.253461			1.94	-0.256572
1.942	0.212941		1.941	0.191613							1.941	-0.25486			1.941	-0.25731
1.943	0.20995		1.942	0.189224							1.942	-0.256268			1.942	-0.258006
1.944	0.20706		1.943	0.186905							1.943	-0.257632			1.943	-0.258635
1.945	0.20434		1.944	0.184664							1.944	-0.258891			1.944	-0.259208
1.946	0.201848		1.945	0.18253							1.945	-0.259989			1.945	-0.259721
1.947	0.19966		1.946	0.180559							1.946	-0.260908			1.946	-0.260138
1.948	0.197851		1.947	0.17883							1.947	-0.261649			1.947	-0.26043
1.949	0.196449		1.948	0.177411							1.948	-0.262195			1.948	-0.260599
1.95	0.195472		1.949	0.176331							1.949	-0.2625			1.949	-0.260628
1.951	0.194952		1.95	0.175575							1.95	-0.262504			1.95	-0.260455
1.952	0.19489		1.951	0.175104							1.951	-0.262166			1.951	-0.260028
1.953	0.195232		1.952	0.174883							1.952	-0.261463			1.952	-0.259339
1.954	0.195927		1.953	0.174879							1.953	-0.260395			1.953	-0.258384
1.955	0.196952		1.954	0.175053							1.954	-0.259003			1.954	-0.257136
1.956	0.198295		1.955	0.175363							1.955	-0.257329			1.955	-0.255585
1.957	0.199934		1.956	0.175781							1.956	-0.255366			1.956	-0.253751
1.958	0.201817		1.957	0.176288							1.957	-0.253091			1.957	-0.251629
1.959	0.203884		1.958	0.176873							1.958	-0.250519			1.958	-0.249202
1.96	0.206073		1.959	0.177526							1.959	-0.247688			1.959	-0.24648
1.961	0.208332		1.96	0.178246							1.96	-0.244628			1.96	-0.243512
1.962	0.210627		1.961	0.179039							1.961	-0.241387			1.961	-0.240348
1.963	0.212912		1.962	0.179896							1.962	-0.238062			1.962	-0.237031
1.964	0.215115		1.963	0.180789							1.963	-0.234747			1.963	-0.23361
1.965	0.217179		1.964	0.181675							1.964	-0.231477			1.964	-0.23014
1.966	0.219083		1.965	0.182518							1.965	-0.228251			1.965	-0.226668
1.967	0.2208		1.966	0.1833							1.966	-0.225084			1.966	-0.223236
1.968	0.222273		1.967	0.184011							1.967	-0.221982			1.967	-0.219887
1.969	0.223466		1.968	0.184649							1.968	-0.218919			1.968	-0.216661
1.97	0.224383		1.969	0.185207							1.969	-0.215897			1.969	-0.213576
1.971	0.225041		1.97	0.185671							1.97	-0.212968			1.97	-0.210637
1.972	0.225458		1.971	0.186016							1.971	-0.21018			1.971	-0.207858
1.973	0.22565		1.972	0.186213							1.972	-0.207548			1.972	-0.205262
1.974	0.225628		1.973	0.186231							1.973	-0.20508			1.973	-0.202873
1.975	0.225407		1.974	0.186057							1.974	-0.202813			1.974	-0.20071
1.976	0.225009		1.975	0.185696							1.975	-0.200799			1.975	-0.198776
1.977	0.224449		1.976	0.185152							1.976	-0.199068			1.976	-0.197068
1.978	0.223731		1.977	0.18442							1.977	-0.197609			1.977	-0.195582
1.979	0.222835		1.978	0.183513							1.978	-0.196398			1.978	-0.194306
1.98	0.22171		1.979	0.182457							1.979	-0.195441			1.979	-0.193226
1.981	0.220308		1.98	0.181277							1.98	-0.194752			1.98	-0.192314
1.982	0.218615		1.981	0.179992							1.981	-0.194308			1.981	-0.191531
1.983	0.216656		1.982	0.178609							1.982	-0.194075			1.982	-0.190858
1.984	0.214471		1.983	0.177122							1.983	-0.19404			1.983	-0.190318
1.985	0.212091		1.984	0.175535							1.984	-0.194212			1.984	-0.18995
1.986	0.209544		1.985	0.173866							1.985	-0.194593			1.985	-0.18978
1.987	0.206856		1.986	0.172135							1.986	-0.195161			1.986	-0.189826
1.988	0.204061		1.987	0.170357							1.987	-0.195859			1.987	-0.190088
1.989	0.201201		1.988	0.168541							1.988	-0.19665			1.988	-0.190541
1.99	0.198334		1.989	0.166697							1.989	-0.19753			1.989	-0.19117
1.991	0.195542		1.99	0.16486							1.99	-0.198504			1.99	-0.191972
1.992	0.192909		1.991	0.163089							1.991	-0.199564			1.991	-0.192918
1.993	0.1905		1.992	0.161443							1.992	-0.200658			1.992	-0.193953
1.994	0.18835		1.993	0.159949							1.993	-0.201703			1.993	-0.195006
[truncated: 1,006 more rows]
