# Supplementary material for: A two-lane mechanism for selective biological ammonium transport
Source: eLife. 2020 Jul 14;9:e57183. doi: 10.7554/eLife.57183 (PMC7447429; doi:10.7554/eLife.57183)
Supplement: Table 1—source data 1. [file elife-57183-table1-data1.xlsx]

## Sheet: Sheet1
	NH4+												K+
	LPR 10												LPR 10
	Variant	n1	n2	n3	n4	n5	n6	n7	n8	Mean	St.dev		Variant	n1	n2	n3	n4	n5	n6	n7	n8	Mean	St.dev
	AmtB-WT	13.7	12.54	11.72	14.5	11.9	14.83	14.97	13.4	13.445	1.28761		AmtB-WT	NC	NC	NC	NC	NC	NC	NC	NC	NC	NC
	D160A	20.36	22.81	21.75	19.96	21.22	22.34	22.9	22.78	21.765	1.1508		D160A	NC	NC	NC	NC	NC	NC	NC	NC	NC	NC
	D160E	19.62	21.12	17.29	19.8	14.49	14.46	15.3	14.19	17.0338	2.81048		D160E	NC	NC	NC	NC	NC	NC	NC	NC	NC	NC
	H168A H318A	31.17	27.2	28.2	31.32	33	27.47	29.5	27.98	29.48	2.13004		H168A H318A	NC	NC	NC	NC	NC	NC	NC	NC	NC	NC
	S219A H168A H318A	NC	NC	NC	NC	NC	NC	NC	NC	NC	NC		S219A H168A H318A	NC	NC	NC	NC	NC	NC	NC	NC	NC	NC
	H168A	29.81	27.87	24.89	28.93	28.91	29.19	28.75	27.82	28.2712	1.51566		H168A	2.43	2.1	2.65	3.21	2.78	3.53	2.75	2.17	2.7025	0.489044
	H318A	25.61	19.93	20.64	23.87	22.71	23.63	18.54	25.53	22.5575	2.61235		H318A	9.39	12.61	10.25	8.24	12.44	10.24	9.21	8.21	10.0738	1.69622
	NeRh50	26.4	24.1	25.64	24.4	22.1	21.35	24.16	24.04	24.0237	1.65938		NeRh50	NC	NC	NC	NC	NC	NC	NC	NC	NC	NC
	LPR 5												LPR 5
	Variant	n1	n2	n3	n4	n5	n6	n7	n8	Mean	St.dev		Variant	n1	n2	n3	n4	n5	n6	n7	n8	Mean	St.dev
	AmtB-WT	17.24	18.68	18.78	18.7	18	18.66	18.96	20.2	18.6525	0.839179		AmtB-WT	NC	NC	NC	NC	NC	NC	NC	NC	NC	NC
	D160A	24.8	27.5	24.36	23.29	24.72	23.04	23.64	22.8	24.2687	1.50975		D160A	NC	NC	NC	NC	NC	NC	NC	NC	NC	NC
	D160E	19.41	16.63	22.3	18.58	19.23	18.53	19.84	21.71	19.5288	1.81022		D160E	NC	NC	NC	NC	NC	NC	NC	NC	NC	NC
	H168A H318A	32.63	27.8	32.57	32.5	26.75	29.7	29.8	26.6	29.7937	2.57804		H168A H318A	NC	NC	NC	NC	NC	NC	NC	NC	NC	NC
	S219A H168A H318A	NC	NC	NC	NC	NC	NC	NC	NC	NC	NC		S219A H168A H318A	NC	NC	NC	NC	NC	NC	NC	NC	NC	NC
	H168A	38.38	39.59	35.9	38.03	38.18	38.48	37.42	38.02	38	1.04765		H168A	6.26	5.48	5.13	6.39	3.91	3.56	5.39	5.53	5.20625	1.00863
	H318A	24.89	31.47	23.99	31.04	29.71	30.65	25.1	29.18	28.2538	3.07684		H318A	15.21	13.28	14.23	14.9	16.13	19.01	13.88	18.5	15.6425	2.10999
	NeRh50	38.59	39.13	35.47	42.36	37.31	41.8	33.38	44	39.005	3.60982		NeRh50	NC	NC	NC	NC	NC	NC	NC	NC	NC	NC
